# Supplementary material for: Dissecting the chromosome-level genome of the Asian Clam (Corbicula fluminea)
Source: Sci Rep. 2021 Jul 22;11:15021. doi: 10.1038/s41598-021-94545-2 (PMC8298618; doi:10.1038/s41598-021-94545-2)
Supplement: Supplementary file 5 — Supplementary Table S9. [file 41598_2021_94545_MOESM5_ESM.xlsx]

## Sheet: Sheet1
miRNA_famlily	Number		rRNA_family	Number		tRNA_family	number
mir-137	1		SSU_rRNA_eukarya	58		Type=Asp	182
mir-1	2		5S_rRNA	311		Type=SeC	33
mir-10	2		LSU_rRNA_eukarya	41		Type=Leu	163
mir-2	2		5_8S_rRNA	10		Type=Undet	126
mir-124	1					Type=Trp	68
mir-598	30					Type=Phe	145
mir-133	2					Type=Gln	66
mir-9	2					Type=SeC(e)	5
mir-219	1					Type=Ala	95
mir-33	2					Type=Cys	53
						Type=Asn	96
						Type=Val	197
						Type=Lys	214
						Type=Arg	145
						Type=Pseudo	11942
						Type=Pro	169
						Type=Sup	11
						Type=Ile	96
						Type=Thr	1643
						Type=Met	139
						Type=Ser	157
						Type=Glu	77
						Type=Gly	187
						Type=His	49
						Type=Tyr	88
						tRNA_num	3707
						tRNA_fal_num	25
