# Supplementary material for: Dissecting the chromosome-level genome of the Asian Clam (Corbicula fluminea)
Source: Sci Rep. 2021 Jul 22;11:15021. doi: 10.1038/s41598-021-94545-2 (PMC8298618; doi:10.1038/s41598-021-94545-2)
Supplement: Supplementary file 6 — Supplementary Table S10. [file 41598_2021_94545_MOESM6_ESM.xlsx]

## Sheet: block_stats(1)
	LG01(0 bp-144266830 bp)	LG02(0 bp-96752369 bp)	LG03 (0 bp-99699725 bp)	LG04 (0 bp-79745118 bp)	LG05 (0 bp-83886143 bp)	LG06 (0 bp-79907130 bp)	LG07 (0 bp-75758333 bp)	LG08 (0 bp-71721866 bp)	LG09 (0 bp-70172945 bp)	LG10 (0 bp-70624541 bp)	LG11 (0 bp-68978117 bp)	LG12 (0 bp-68927514 bp)	LG13 (0 bp-67138617 bp)	LG14 (0 bp-67751340 bp)	LG15 (0 bp-64976359 bp)	LG16 (0 bp-65110397 bp)	LG17 (0 bp-64819678 bp)	LG18 (0 bp-57926138 bp)
chr1 (0 bp-61877160 bp)	0	1	0	0	0	17	1	0	0	0	1	0	0	0	0	0	0	0
chr2 (0 bp-55139113 bp)	0	0	0	0	0	0	0	0	18	0	1	0	0	0	0	0	0	0
chr3 (0 bp-57597570 bp)	0	0	15	0	0	0	0	0	0	0	1	0	0	0	1	0	0	0
chr4 (0 bp-58524437 bp)	0	0	2	0	0	0	0	0	1	0	0	0	7	1	0	0	0	0
chr5 (0 bp-58336189 bp)	1	0	0	0	0	0	0	0	0	0	0	0	0	0	0	10	0	0
chr6 (0 bp-56841912 bp)	0	0	0	0	0	0	0	0	0	13	0	0	0	0	0	0	0	0
chr7 (0 bp-49241792 bp)	0	0	0	0	0	0	9	0	0	0	0	0	0	0	0	0	0	0
chr8 (0 bp-47586491 bp)	9	1	0	0	0	0	1	0	0	0	0	1	0	0	0	0	0	0
chr9 (0 bp-39621008 bp)	0	1	0	0	1	0	0	0	0	0	0	0	0	4	0	0	1	0
chr10 (0 bp-42120502 bp)	0	0	0	0	1	0	0	0	0	0	10	1	0	0	0	0	0	0
chr11 (0 bp-46146653 bp)	4	1	0	0	1	0	0	0	1	0	0	0	0	0	0	0	0	0
chr12 (0 bp-36206569 bp)	0	0	1	3	0	0	0	0	0	0	0	0	0	0	0	0	1	0
chr13 (0 bp-47287480 bp)	0	0	0	0	1	0	0	0	1	0	0	7	0	0	0	0	0	0
chr14 (0 bp-39785154 bp)	0	0	0	0	0	0	0	0	0	0	0	0	0	0	7	0	0	0
chr15 (0 bp-51000240 bp)	0	1	0	0	1	0	0	0	0	0	0	0	0	1	0	0	16	0
chr16 (0 bp-32582240 bp)	0	0	1	0	0	0	0	0	0	0	0	0	0	0	0	0	0	4
chr17 (0 bp-56467786 bp)	0	26	2	0	0	0	0	0	0	0	0	0	0	0	0	0	0	0
chr18 (0 bp-25994160 bp)	0	0	0	0	0	0	0	2	0	0	0	0	0	0	0	0	0	0
chr19 (0 bp-62145902 bp)	0	0	0	0	30	0	0	1	0	0	0	0	0	0	0	0	0	0
Total	14	31	21	3	35	17	11	3	21	13	13	9	7	6	8	10	18	4
