# Supplementary material for: Dissecting the chromosome-level genome of the Asian Clam (Corbicula fluminea)
Source: Sci Rep. 2021 Jul 22;11:15021. doi: 10.1038/s41598-021-94545-2 (PMC8298618; doi:10.1038/s41598-021-94545-2)
Supplement: Supplementary file 7 — Supplementary Table S11. [file 41598_2021_94545_MOESM7_ESM.xlsx]

## Sheet: gene_type
Group	types	species genes
group46091	species_special	Corbicula_fluminea_species_EVM0009437.1
group18093	other_ortholog	Crassostrea_virginica_species_rna-XM_022462755.1	Crassostrea_virginica_species_rna-XM_022457473.1	Crassostrea_gigas_species_EVM0004007.1
group54511	species_special	Crassostrea_gigas_species_EVM0039781.1
group13165	species_special	Bathymodiolus_platifrons_species_14910:Bpl_scaf_33747-1.11-mRNA-1	Bathymodiolus_platifrons_species_16954:Bpl_scaf_50002-0.15-mRNA-1	Bathymodiolus_platifrons_species_5636:Bpl_scaf_8559-0.9-mRNA-1	Bathymodiolus_platifrons_species_14910:Bpl_scaf_33747-1.13-mRNA-1
group12004	other_ortholog	Crassostrea_gigas_species_EVM0049299.1	Crassostrea_gigas_species_EVM0029905.1	Crassostrea_virginica_species_rna-XM_022438464.1	Crassostrea_virginica_species_rna-XM_022438463.1	Crassostrea_virginica_species_rna-XM_022438465.1
group58845	species_special	Crassostrea_virginica_species_rna-XM_022430735.1
group13460	other_ortholog	Bathymodiolus_platifrons_species_13615:Bpl_scaf_61340-2.10-mRNA-1	Crassostrea_virginica_species_rna-XM_022460006.1	Crassostrea_virginica_species_rna-XM_022431236.1	Crassostrea_gigas_species_EVM0011876.1
group36752	species_special	Bathymodiolus_platifrons_species_7005:Bpl_scaf_43770-0.4-mRNA-1
group19327	other_ortholog	Crassostrea_gigas_species_EVM0020618.1	Crassostrea_gigas_species_EVM0020657.1	Crassostrea_virginica_species_rna-XM_022488415.1
group22603	species_special	Bathymodiolus_platifrons_species_13540:Bpl_scaf_25767-5.3-mRNA-1	Bathymodiolus_platifrons_species_11373:Bpl_scaf_25998-3.19-mRNA-1
group7210	other_ortholog	Corbicula_fluminea_species_EVM0007412.1	Corbicula_fluminea_species_EVM0029994.1	Bathymodiolus_platifrons_species_4886:Bpl_scaf_23287-9.4-mRNA-1	Corbicula_fluminea_species_EVM0031484.1	Lottia_gigantea_species_rna-XM_009068586.1	Crassostrea_gigas_species_EVM0032935.1
group19716	other_ortholog	Crassostrea_gigas_species_EVM0008701.1	Crassostrea_virginica_species_rna-XM_022480715.1	Crassostrea_virginica_species_rna-XM_022480714.1
group37524	species_special	Bathymodiolus_platifrons_species_2648:Bpl_scaf_48327-1.1-mRNA-1
group39205	species_special	Bathymodiolus_platifrons_species_8031:Bpl_scaf_56813-0.2-mRNA-1
group19358	species_special	Crassostrea_gigas_species_EVM0058471.1	Crassostrea_gigas_species_EVM0039608.1	Crassostrea_gigas_species_EVM0022337.1
group41630	species_special	Corbicula_fluminea_species_EVM0021405.1
group55176	species_special	Crassostrea_gigas_species_EVM0041349.1
group43360	species_special	Corbicula_fluminea_species_EVM0019886.1
group46428	species_special	Corbicula_fluminea_species_EVM0032319.1
group7292	multi_ortholog	Bathymodiolus_platifrons_species_13364:Bpl_scaf_15282-11.9-mRNA-1	Lottia_gigantea_species_rna-XM_009068309.1	Crassostrea_gigas_species_EVM0041172.1	Crassostrea_gigas_species_EVM0026858.1	Crassostrea_virginica_species_rna-XM_022486220.1	Corbicula_fluminea_species_EVM0021022.1
group67850	species_special	Lottia_gigantea_species_rna-XM_009060865.1
group51361	species_special	Corbicula_fluminea_species_EVM0032178.1
group8221	other_ortholog	Crassostrea_virginica_species_rna-XM_022462639.1	Crassostrea_virginica_species_rna-XM_022462640.1	Crassostrea_virginica_species_rna-XM_022431223.1	Crassostrea_virginica_species_rna-XM_022431222.1	Crassostrea_gigas_species_EVM0052884.1	Crassostrea_gigas_species_EVM0057967.1
group17553	species_special	Corbicula_fluminea_species_EVM0033225.1	Corbicula_fluminea_species_EVM0011892.1	Corbicula_fluminea_species_EVM0031789.1
group42598	species_special	Corbicula_fluminea_species_EVM0017585.1
group9416	other_ortholog	Crassostrea_gigas_species_EVM0027652.1	Crassostrea_gigas_species_EVM0028849.1	Crassostrea_gigas_species_EVM0041697.1	Crassostrea_gigas_species_EVM0034702.1	Crassostrea_gigas_species_EVM0057504.1	Crassostrea_virginica_species_rna-XM_022476078.1
group38053	species_special	Bathymodiolus_platifrons_species_15347:Bpl_scaf_51490-0.2-mRNA-1
group58128	species_special	Crassostrea_gigas_species_EVM0003516.1
group14321	other_ortholog	Crassostrea_gigas_species_EVM0037423.1	Crassostrea_virginica_species_rna-XM_022453995.1	Crassostrea_virginica_species_rna-XM_022453997.1	Crassostrea_gigas_species_EVM0005837.1
group16723	species_special	Bathymodiolus_platifrons_species_15482:Bpl_scaf_2297-0.1-mRNA-1	Bathymodiolus_platifrons_species_15594:Bpl_scaf_51516-0.0-mRNA-1	Bathymodiolus_platifrons_species_1607:Bpl_scaf_26316-0.2-mRNA-1
group13496	other_ortholog	Bathymodiolus_platifrons_species_16997:Bpl_scaf_64310-3.8-mRNA-1	Crassostrea_gigas_species_EVM0016839.1	Crassostrea_virginica_species_rna-XM_022485461.1	Crassostrea_gigas_species_EVM0048989.1
group10343	other_ortholog	Bathymodiolus_platifrons_species_17698:Bpl_scaf_23676-4.7-mRNA-1	Crassostrea_gigas_species_EVM0025392.1	Crassostrea_virginica_species_rna-XM_022473193.1	Crassostrea_gigas_species_EVM0004462.1	Corbicula_fluminea_species_EVM0034971.1
group39671	species_special	Bathymodiolus_platifrons_species_3854:Bpl_scaf_59479-0.6-mRNA-1
group64431	species_special	Lottia_gigantea_species_rna-XM_009052764.1
group37265	species_special	Bathymodiolus_platifrons_species_3460:Bpl_scaf_46876-3.19-mRNA-1
group31494	species_special	Bathymodiolus_platifrons_species_7211:Bpl_scaf_11942-3.8-mRNA-1
group50431	species_special	Corbicula_fluminea_species_EVM0027718.3
group5186	other_ortholog	Bathymodiolus_platifrons_species_13932:Bpl_scaf_12374-2.11-mRNA-1	Bathymodiolus_platifrons_species_10567:Bpl_scaf_33028-5.4-mRNA-1	Bathymodiolus_platifrons_species_13350:Bpl_scaf_28214-0.3-mRNA-1	Bathymodiolus_platifrons_species_869:Bpl_scaf_53773-1.3-mRNA-1	Corbicula_fluminea_species_EVM0024277.1	Bathymodiolus_platifrons_species_17699:Bpl_scaf_13797-2.12-mRNA-1	Bathymodiolus_platifrons_species_2783:Bpl_scaf_41711-0.0-mRNA-1
group28817	species_special	Crassostrea_gigas_species_EVM0030540.1	Crassostrea_gigas_species_EVM0028691.1
group44290	species_special	Corbicula_fluminea_species_EVM0016877.1
group39607	species_special	Bathymodiolus_platifrons_species_13904:Bpl_scaf_59079-1.10-mRNA-1
group68565	species_special	Lottia_gigantea_species_rna-XM_009062573.1
group2956	other_ortholog	Corbicula_fluminea_species_EVM0032183.1	Crassostrea_virginica_species_rna-XM_022450543.1	Crassostrea_virginica_species_rna-XM_022453693.1	Crassostrea_virginica_species_rna-XM_022450544.1	Corbicula_fluminea_species_EVM0003137.1	Crassostrea_virginica_species_rna-XM_022453694.1	Crassostrea_gigas_species_EVM0005291.1	Crassostrea_gigas_species_EVM0032817.2	Lottia_gigantea_species_rna-XM_009050661.1	Corbicula_fluminea_species_EVM0001221.1
group68847	species_special	Lottia_gigantea_species_rna-XM_009063219.1
group15616	species_special	Crassostrea_gigas_species_EVM0020984.1	Crassostrea_gigas_species_EVM0048305.1	Crassostrea_gigas_species_EVM0010761.1	Crassostrea_gigas_species_EVM0015432.1
group11448	other_ortholog	Corbicula_fluminea_species_EVM0027117.1	Crassostrea_virginica_species_rna-XM_022472696.1	Crassostrea_virginica_species_rna-XM_022472698.1	Crassostrea_gigas_species_EVM0044946.1	Crassostrea_gigas_species_EVM0018539.1
group35676	species_special	Bathymodiolus_platifrons_species_12014:Bpl_scaf_36952-0.8-mRNA-1
group64815	species_special	Lottia_gigantea_species_rna-XM_009053627.1
group27311	species_special	Crassostrea_gigas_species_EVM0011936.1	Crassostrea_gigas_species_EVM0005418.1
group20775	other_ortholog	Crassostrea_gigas_species_EVM0048999.1	Crassostrea_gigas_species_EVM0054884.1	Crassostrea_virginica_species_rna-XM_022452350.1
group57077	species_special	Crassostrea_gigas_species_EVM0057056.1
group38030	species_special	Bathymodiolus_platifrons_species_7437:Bpl_scaf_51293-0.11-mRNA-1
group67740	species_special	Lottia_gigantea_species_rna-XM_009060592.1
group24264	species_special	Corbicula_fluminea_species_EVM0007635.1	Corbicula_fluminea_species_EVM0000858.1
group43534	species_special	Corbicula_fluminea_species_EVM0015535.1
group3867	other_ortholog	Crassostrea_gigas_species_EVM0020007.1	Crassostrea_gigas_species_EVM0019327.1	Crassostrea_gigas_species_EVM0049589.1	Crassostrea_virginica_species_rna-XM_022446285.1	Crassostrea_virginica_species_rna-XM_022444898.1	Crassostrea_gigas_species_EVM0020868.1	Crassostrea_gigas_species_EVM0008114.1	Crassostrea_gigas_species_EVM0052764.1	Crassostrea_gigas_species_EVM0003140.1
group25303	species_special	Corbicula_fluminea_species_EVM0034867.1	Corbicula_fluminea_species_EVM0014223.1
group29978	species_special	Crassostrea_virginica_species_rna-XM_022466990.1	Crassostrea_virginica_species_rna-XM_022447771.1
group51045	species_special	Corbicula_fluminea_species_EVM0011856.1
group31644	species_special	Bathymodiolus_platifrons_species_15186:Bpl_scaf_13036-7.8-mRNA-1
group29378	species_special	Crassostrea_gigas_species_EVM0006569.1	Crassostrea_gigas_species_EVM0026652.1
group67704	species_special	Lottia_gigantea_species_rna-XM_009060503.1
group68671	species_special	Lottia_gigantea_species_rna-XM_009062814.1
group65802	species_special	Lottia_gigantea_species_rna-XM_009055945.1
group11287	species_special	Corbicula_fluminea_species_EVM0034143.1	Corbicula_fluminea_species_EVM0007609.1	Corbicula_fluminea_species_EVM0020299.1	Corbicula_fluminea_species_EVM0009376.1	Corbicula_fluminea_species_EVM0032029.1
group44357	species_special	Corbicula_fluminea_species_EVM0004694.1
group23004	species_special	Bathymodiolus_platifrons_species_6146:Bpl_scaf_38120-0.12-mRNA-1	Bathymodiolus_platifrons_species_2112:Bpl_scaf_62509-1.38-mRNA-1
group48880	species_special	Corbicula_fluminea_species_EVM0012514.1
group660	other_ortholog	Bathymodiolus_platifrons_species_11304:Bpl_scaf_8147-5.44-mRNA-1	Bathymodiolus_platifrons_species_5259:Bpl_scaf_38118-0.1-mRNA-1	Bathymodiolus_platifrons_species_6365:Bpl_scaf_31349-4.2-mRNA-1	Bathymodiolus_platifrons_species_6365:Bpl_scaf_31349-4.15-mRNA-1	Bathymodiolus_platifrons_species_5259:Bpl_scaf_38118-0.2-mRNA-1	Bathymodiolus_platifrons_species_15418:Bpl_scaf_44650-0.1-mRNA-1	Bathymodiolus_platifrons_species_3744:Bpl_scaf_54992-0.1-mRNA-1	Bathymodiolus_platifrons_species_1842:Bpl_scaf_57954-2.10-mRNA-1	Bathymodiolus_platifrons_species_1842:Bpl_scaf_57954-2.9-mRNA-1	Bathymodiolus_platifrons_species_11304:Bpl_scaf_8147-5.39-mRNA-1	Bathymodiolus_platifrons_species_11304:Bpl_scaf_8147-4.2-mRNA-1	Bathymodiolus_platifrons_species_11304:Bpl_scaf_8147-5.42-mRNA-1	Bathymodiolus_platifrons_species_11304:Bpl_scaf_8147-5.43-mRNA-1	Bathymodiolus_platifrons_species_15418:Bpl_scaf_44650-0.12-mRNA-1	Bathymodiolus_platifrons_species_1842:Bpl_scaf_57954-2.35-mRNA-1	Bathymodiolus_platifrons_species_11304:Bpl_scaf_8147-4.23-mRNA-1	Bathymodiolus_platifrons_species_11304:Bpl_scaf_8147-4.10-mRNA-1	Bathymodiolus_platifrons_species_11304:Bpl_scaf_8147-5.38-mRNA-1	Bathymodiolus_platifrons_species_11304:Bpl_scaf_8147-5.41-mRNA-1	Lottia_gigantea_species_rna-XM_009059067.1
group30656	species_special	Lottia_gigantea_species_rna-XM_009045958.1	Lottia_gigantea_species_rna-XM_009045959.1
group52332	species_special	Corbicula_fluminea_species_EVM0035286.1
group26130	species_special	Corbicula_fluminea_species_EVM0020952.3	Corbicula_fluminea_species_EVM0018269.1
group61123	species_special	Crassostrea_virginica_species_rna-XM_022456296.1
group54180	species_special	Crassostrea_gigas_species_EVM0056189.1
group44859	species_special	Corbicula_fluminea_species_EVM0012549.1
group32032	species_special	Bathymodiolus_platifrons_species_1883:Bpl_scaf_15695-0.8-mRNA-1
group23825	species_special	Corbicula_fluminea_species_EVM0021834.1	Corbicula_fluminea_species_EVM0004469.1
group32867	species_special	Bathymodiolus_platifrons_species_186:Bpl_scaf_19969-0.0-mRNA-1
group89	other_ortholog	Crassostrea_gigas_species_EVM0009464.1	Crassostrea_gigas_species_EVM0002747.1	Crassostrea_gigas_species_EVM0057070.1	Crassostrea_gigas_species_EVM0022217.1	Crassostrea_gigas_species_EVM0000028.1	Crassostrea_gigas_species_EVM0017746.1	Crassostrea_gigas_species_EVM0022978.1	Crassostrea_gigas_species_EVM0021974.1	Crassostrea_gigas_species_EVM0005772.1	Crassostrea_gigas_species_EVM0043748.1	Crassostrea_gigas_species_EVM0042302.1	Crassostrea_gigas_species_EVM0037232.1	Crassostrea_gigas_species_EVM0029527.1	Crassostrea_gigas_species_EVM0024758.1	Crassostrea_gigas_species_EVM0024960.1	Crassostrea_gigas_species_EVM0008598.1	Crassostrea_gigas_species_EVM0017285.1	Crassostrea_gigas_species_EVM0048935.1	Crassostrea_gigas_species_EVM0030520.1	Crassostrea_gigas_species_EVM0021949.1	Crassostrea_gigas_species_EVM0008044.1	Crassostrea_gigas_species_EVM0031553.1	Crassostrea_gigas_species_EVM0035155.1	Crassostrea_gigas_species_EVM0056676.1	Crassostrea_gigas_species_EVM0031796.1	Crassostrea_gigas_species_EVM0029940.1	Crassostrea_gigas_species_EVM0038448.1	Crassostrea_gigas_species_EVM0027132.1	Crassostrea_gigas_species_EVM0034394.1	Crassostrea_gigas_species_EVM0031871.1	Crassostrea_gigas_species_EVM0010375.1	Crassostrea_gigas_species_EVM0032538.1	Crassostrea_virginica_species_rna-XM_022472560.1	Crassostrea_virginica_species_rna-XM_022464723.1	Crassostrea_gigas_species_EVM0040605.1	Crassostrea_gigas_species_EVM0018272.1	Crassostrea_gigas_species_EVM0051384.1	Crassostrea_gigas_species_EVM0000779.1	Crassostrea_gigas_species_EVM0035483.1	Crassostrea_gigas_species_EVM0009293.1	Crassostrea_gigas_species_EVM0032838.1	Crassostrea_gigas_species_EVM0053745.1	Crassostrea_gigas_species_EVM0027076.1	Crassostrea_virginica_species_rna-XM_022464527.1	Crassostrea_gigas_species_EVM0028125.1	Crassostrea_gigas_species_EVM0019396.1	Crassostrea_gigas_species_EVM0025515.1	Crassostrea_gigas_species_EVM0024491.1
group58962	species_special	Crassostrea_virginica_species_rna-XM_022460887.1
group28318	species_special	Crassostrea_gigas_species_EVM0031852.1	Crassostrea_gigas_species_EVM0022086.1
group57899	species_special	Crassostrea_gigas_species_EVM0013565.1
group43784	species_special	Corbicula_fluminea_species_EVM0000945.1
group35467	species_special	Bathymodiolus_platifrons_species_16567:Bpl_scaf_35727-1.17-mRNA-1
group17772	other_ortholog	Corbicula_fluminea_species_EVM0028482.1	Crassostrea_gigas_species_EVM0032927.1	Corbicula_fluminea_species_EVM0005012.1
group37272	species_special	Bathymodiolus_platifrons_species_14616:Bpl_scaf_46927-0.4-mRNA-1
group44549	species_special	Corbicula_fluminea_species_EVM0000711.1
group14777	other_ortholog	Crassostrea_gigas_species_EVM0035888.1	Crassostrea_gigas_species_EVM0019074.1	Crassostrea_virginica_species_rna-XM_022432951.1	Lottia_gigantea_species_rna-XM_009063409.1
group26637	other_ortholog	Crassostrea_gigas_species_EVM0039785.1	Crassostrea_virginica_species_rna-XM_022467116.1
group28218	species_special	Crassostrea_gigas_species_EVM0050620.1	Crassostrea_gigas_species_EVM0000973.1
group4488	other_ortholog	Bathymodiolus_platifrons_species_2110:Bpl_scaf_52271-1.0-mRNA-1	Bathymodiolus_platifrons_species_9174:Bpl_scaf_60795-2.1-mRNA-1	Crassostrea_virginica_species_rna-XM_022488870.1	Crassostrea_virginica_species_rna-XM_022488871.1	Crassostrea_virginica_species_rna-XM_022489536.1	Crassostrea_virginica_species_rna-XM_022489535.1	Crassostrea_gigas_species_EVM0039202.1	Crassostrea_gigas_species_EVM0048868.1
group44798	species_special	Corbicula_fluminea_species_EVM0012311.1
group1979	multi_ortholog	Bathymodiolus_platifrons_species_49:Bpl_scaf_3489-0.13-mRNA-1	Corbicula_fluminea_species_EVM0031414.1	Corbicula_fluminea_species_EVM0015252.1	Crassostrea_virginica_species_rna-XM_022451632.1	Crassostrea_virginica_species_rna-XM_022451633.1	Crassostrea_virginica_species_rna-XM_022451631.1	Crassostrea_virginica_species_rna-XM_022451625.1	Crassostrea_virginica_species_rna-XM_022451627.1	Crassostrea_virginica_species_rna-XM_022451624.1	Crassostrea_gigas_species_EVM0041592.1	Crassostrea_gigas_species_EVM0057968.1	Lottia_gigantea_species_rna-XM_009054400.1
group59831	species_special	Crassostrea_virginica_species_rna-XM_022480360.1
group62768	species_special	Lottia_gigantea_species_rna-XM_009048925.1
group11419	other_ortholog	Corbicula_fluminea_species_EVM0001079.1	Crassostrea_gigas_species_EVM0053786.1	Crassostrea_gigas_species_EVM0026322.1	Crassostrea_virginica_species_rna-XM_022466983.1	Lottia_gigantea_species_rna-XM_009049261.1
group55989	species_special	Crassostrea_gigas_species_EVM0033460.1
group31592	species_special	Bathymodiolus_platifrons_species_2830:Bpl_scaf_12540-1.42-mRNA-1
group16759	species_special	Bathymodiolus_platifrons_species_12910:Bpl_scaf_56279-1.16-mRNA-1	Bathymodiolus_platifrons_species_14564:Bpl_scaf_63590-2.2-mRNA-1	Bathymodiolus_platifrons_species_14564:Bpl_scaf_63590-2.27-mRNA-1
group18895	other_ortholog	Crassostrea_gigas_species_EVM0042561.1	Crassostrea_gigas_species_EVM0019404.1	Crassostrea_virginica_species_rna-XM_022476740.1
group5623	multi_ortholog	Bathymodiolus_platifrons_species_15438:Bpl_scaf_31134-3.14-mRNA-1	Crassostrea_virginica_species_rna-XM_022459738.1	Crassostrea_virginica_species_rna-XM_022460089.1	Corbicula_fluminea_species_EVM0007011.1	Crassostrea_gigas_species_EVM0044395.1	Crassostrea_gigas_species_EVM0023528.1	Lottia_gigantea_species_rna-XM_009066335.1
group41393	species_special	Bathymodiolus_platifrons_species_5269:Bpl_scaf_9971-6.6-mRNA-1
group42022	species_special	Corbicula_fluminea_species_EVM0034590.1
group22495	species_special	Bathymodiolus_platifrons_species_16106:Bpl_scaf_23521-6.46-mRNA-1	Bathymodiolus_platifrons_species_3648:Bpl_scaf_56194-0.12-mRNA-1
group51442	species_special	Corbicula_fluminea_species_EVM0011721.1
group65548	species_special	Lottia_gigantea_species_rna-XM_009055332.1
group45053	species_special	Corbicula_fluminea_species_EVM0017734.1
group15452	other_ortholog	Crassostrea_gigas_species_EVM0033915.1	Crassostrea_gigas_species_EVM0037786.1	Crassostrea_virginica_species_rna-XM_022467827.1	Crassostrea_virginica_species_rna-XM_022467828.1
group9260	species_special	Crassostrea_virginica_species_rna-XM_022454010.1	Crassostrea_virginica_species_rna-XM_022454392.1	Crassostrea_virginica_species_rna-XM_022447585.1	Crassostrea_virginica_species_rna-XM_022448475.1	Crassostrea_virginica_species_rna-XM_022454393.1	Crassostrea_virginica_species_rna-XM_022451959.1
group21758	species_special	Lottia_gigantea_species_rna-XM_009050017.1	Lottia_gigantea_species_rna-XM_009050020.1	Lottia_gigantea_species_rna-XM_009068184.1
group32008	species_special	Bathymodiolus_platifrons_species_11730:Bpl_scaf_15457-0.6-mRNA-1
group67781	species_special	Lottia_gigantea_species_rna-XM_009060716.1
group20737	other_ortholog	Crassostrea_gigas_species_EVM0053185.1	Crassostrea_gigas_species_EVM0020530.1	Crassostrea_virginica_species_rna-XM_022452389.1
group2326	multi_ortholog	Bathymodiolus_platifrons_species_3138:Bpl_scaf_28712-4.9-mRNA-1	Crassostrea_virginica_species_rna-XM_022487396.1	Crassostrea_virginica_species_rna-XM_022487393.1	Crassostrea_virginica_species_rna-XM_022487395.1	Crassostrea_virginica_species_rna-XM_022487392.1	Crassostrea_gigas_species_EVM0004569.1	Crassostrea_virginica_species_rna-XM_022487394.1	Crassostrea_virginica_species_rna-XM_022487390.1	Crassostrea_gigas_species_EVM0058392.1	Corbicula_fluminea_species_EVM0032078.2	Lottia_gigantea_species_rna-XM_009068152.1
group69908	species_special	Lottia_gigantea_species_rna-XM_009065771.1
group10478	single_ortholog	Bathymodiolus_platifrons_species_4716:Bpl_scaf_31123-0.12-mRNA-1	Crassostrea_gigas_species_EVM0041071.1	Crassostrea_virginica_species_rna-XM_022481206.1	Corbicula_fluminea_species_EVM0016320.1	Lottia_gigantea_species_rna-XM_009048392.1
group2028	multi_ortholog	Bathymodiolus_platifrons_species_2532:Bpl_scaf_52671-3.7-mRNA-1	Crassostrea_virginica_species_rna-XM_022485524.1	Crassostrea_virginica_species_rna-XM_022485523.1	Crassostrea_virginica_species_rna-XM_022485527.1	Crassostrea_virginica_species_rna-XM_022485528.1	Crassostrea_virginica_species_rna-XM_022485521.1	Crassostrea_virginica_species_rna-XM_022485522.1	Crassostrea_virginica_species_rna-XM_022485525.1	Crassostrea_gigas_species_EVM0043787.3	Lottia_gigantea_species_rna-XM_009046970.1	Corbicula_fluminea_species_EVM0012203.3	Crassostrea_gigas_species_EVM0011934.3
group33836	species_special	Bathymodiolus_platifrons_species_4069:Bpl_scaf_25973-3.4-mRNA-1
group26497	other_ortholog	Crassostrea_gigas_species_EVM0027662.1	Crassostrea_virginica_species_rna-XM_022435091.1
group23449	species_special	Bathymodiolus_platifrons_species_17910:Bpl_scaf_54088-0.0-mRNA-1	Bathymodiolus_platifrons_species_9526:Bpl_scaf_62995-1.17-mRNA-1
group47151	species_special	Corbicula_fluminea_species_EVM0010432.1
group43238	species_special	Corbicula_fluminea_species_EVM0006031.1
group18894	species_special	Crassostrea_gigas_species_EVM0006689.1	Crassostrea_gigas_species_EVM0025692.1	Crassostrea_gigas_species_EVM0039027.1
group8302	multi_ortholog	Bathymodiolus_platifrons_species_924:Bpl_scaf_49759-10.5-mRNA-1	Crassostrea_gigas_species_EVM0024954.1	Crassostrea_virginica_species_rna-XM_022470198.1	Crassostrea_gigas_species_EVM0058380.1	Lottia_gigantea_species_rna-XM_009067336.1	Corbicula_fluminea_species_EVM0023925.1
group43006	species_special	Corbicula_fluminea_species_EVM0021638.1
group5910	multi_ortholog	Bathymodiolus_platifrons_species_7941:Bpl_scaf_46866-2.25-mRNA-1	Crassostrea_gigas_species_EVM0036781.1	Crassostrea_virginica_species_rna-XM_022482484.1	Crassostrea_virginica_species_rna-XM_022482483.1	Corbicula_fluminea_species_EVM0035892.1	Lottia_gigantea_species_rna-XM_009052662.1	Crassostrea_gigas_species_EVM0033545.1
group71297	species_special	Lottia_gigantea_species_rna-XM_009069086.1
group51780	species_special	Corbicula_fluminea_species_EVM0005507.1
group13673	species_special	Corbicula_fluminea_species_EVM0003357.1	Corbicula_fluminea_species_EVM0020590.1	Corbicula_fluminea_species_EVM0015789.1	Corbicula_fluminea_species_EVM0032081.1
group4285	multi_ortholog	Bathymodiolus_platifrons_species_6574:Bpl_scaf_34315-1.13-mRNA-1	Crassostrea_gigas_species_EVM0016158.1	Crassostrea_virginica_species_rna-XM_022486174.1	Crassostrea_virginica_species_rna-XM_022486175.1	Crassostrea_gigas_species_EVM0053813.1	Corbicula_fluminea_species_EVM0002543.1	Corbicula_fluminea_species_EVM0018228.1	Lottia_gigantea_species_rna-XM_009055956.1
group58474	species_special	Crassostrea_gigas_species_EVM0002850.1
group8959	species_special	Corbicula_fluminea_species_EVM0029250.1	Corbicula_fluminea_species_EVM0035063.1	Corbicula_fluminea_species_EVM0007630.1	Corbicula_fluminea_species_EVM0027122.1	Corbicula_fluminea_species_EVM0031714.1	Corbicula_fluminea_species_EVM0002566.1
group13741	other_ortholog	Corbicula_fluminea_species_EVM0015414.1	Lottia_gigantea_species_rna-XM_009060994.1	Crassostrea_gigas_species_EVM0057868.1	Crassostrea_virginica_species_rna-XM_022475319.1
group61416	species_special	Lottia_gigantea_species_rna-XM_009045807.1
group37482	species_special	Bathymodiolus_platifrons_species_18823:Bpl_scaf_48231-2.7-mRNA-1
group69549	species_special	Lottia_gigantea_species_rna-XM_009064853.1
group54397	species_special	Crassostrea_gigas_species_EVM0051535.1
group55569	species_special	Crassostrea_gigas_species_EVM0023638.1
group33372	species_special	Bathymodiolus_platifrons_species_3448:Bpl_scaf_23485-0.6-mRNA-1
group31454	species_special	Bathymodiolus_platifrons_species_6528:Bpl_scaf_11663-8.16-mRNA-1
group33268	species_special	Bathymodiolus_platifrons_species_12677:Bpl_scaf_22804-0.15-mRNA-1
group58892	species_special	Crassostrea_virginica_species_rna-XM_022461931.1
group11716	species_special	Crassostrea_gigas_species_EVM0032398.1	Crassostrea_gigas_species_EVM0044275.1	Crassostrea_gigas_species_EVM0014059.1	Crassostrea_gigas_species_EVM0000270.1	Crassostrea_gigas_species_EVM0002791.1
group26829	species_special	Crassostrea_virginica_species_rna-XM_022449363.1	Crassostrea_virginica_species_rna-XM_022449362.1
group51285	species_special	Corbicula_fluminea_species_EVM0025602.1
group68458	species_special	Lottia_gigantea_species_rna-XM_009062259.1
group17273	other_ortholog	Bathymodiolus_platifrons_species_5354:Bpl_scaf_63866-4.5-mRNA-1	Corbicula_fluminea_species_EVM0022477.1	Corbicula_fluminea_species_EVM0022474.1
group15404	other_ortholog	Crassostrea_gigas_species_EVM0010702.1	Crassostrea_gigas_species_EVM0035028.1	Crassostrea_virginica_species_rna-XM_022471170.1	Crassostrea_virginica_species_rna-XM_022471526.1
group63259	species_special	Lottia_gigantea_species_rna-XM_009050003.1
group55937	species_special	Crassostrea_gigas_species_EVM0049241.1
group21122	other_ortholog	Crassostrea_gigas_species_EVM0021559.1	Crassostrea_gigas_species_EVM0007882.1	Crassostrea_virginica_species_rna-XM_022462892.1
group27912	species_special	Crassostrea_gigas_species_EVM0053222.1	Crassostrea_gigas_species_EVM0054133.1
group10856	other_ortholog	Bathymodiolus_platifrons_species_5032:Bpl_scaf_55356-3.17-mRNA-1	Crassostrea_virginica_species_rna-XM_022482845.1	Crassostrea_gigas_species_EVM0045448.1	Crassostrea_gigas_species_EVM0042343.1	Corbicula_fluminea_species_EVM0026242.1
group26597	other_ortholog	Crassostrea_gigas_species_EVM0010661.3	Crassostrea_virginica_species_rna-XM_022443950.1
group117	other_ortholog	Crassostrea_gigas_species_EVM0010645.1	Crassostrea_gigas_species_EVM0032278.1	Crassostrea_virginica_species_rna-XM_022469723.1	Crassostrea_virginica_species_rna-XM_022468114.1	Crassostrea_gigas_species_EVM0045890.1	Crassostrea_virginica_species_rna-XM_022468115.1	Crassostrea_gigas_species_EVM0050370.1	Crassostrea_virginica_species_rna-XM_022468116.1	Crassostrea_gigas_species_EVM0044453.1	Crassostrea_gigas_species_EVM0024134.1	Crassostrea_virginica_species_rna-XM_022469722.1	Crassostrea_virginica_species_rna-XM_022469720.1	Crassostrea_virginica_species_rna-XM_022469718.1	Crassostrea_virginica_species_rna-XM_022469716.1	Crassostrea_gigas_species_EVM0041668.1	Crassostrea_gigas_species_EVM0044234.1	Crassostrea_virginica_species_rna-XM_022469717.1	Crassostrea_virginica_species_rna-XM_022470734.1	Crassostrea_virginica_species_rna-XM_022470743.1	Crassostrea_virginica_species_rna-XM_022470744.1	Crassostrea_virginica_species_rna-XM_022470746.1	Crassostrea_virginica_species_rna-XM_022470738.1	Crassostrea_gigas_species_EVM0058317.1	Crassostrea_virginica_species_rna-XM_022470736.1	Crassostrea_gigas_species_EVM0012467.1	Crassostrea_gigas_species_EVM0016820.1	Crassostrea_virginica_species_rna-XM_022470739.1	Crassostrea_virginica_species_rna-XM_022470745.1	Crassostrea_virginica_species_rna-XM_022470735.1	Crassostrea_gigas_species_EVM0005810.1	Crassostrea_gigas_species_EVM0050354.1	Crassostrea_virginica_species_rna-XM_022470740.1	Crassostrea_virginica_species_rna-XM_022469731.1	Crassostrea_gigas_species_EVM0050662.1	Crassostrea_virginica_species_rna-XM_022470741.1	Crassostrea_gigas_species_EVM0034841.1	Crassostrea_virginica_species_rna-XM_022469721.1	Crassostrea_virginica_species_rna-XM_022466896.1	Crassostrea_virginica_species_rna-XM_022470742.1	Crassostrea_virginica_species_rna-XM_022469732.1	Crassostrea_virginica_species_rna-XM_022469733.1	Crassostrea_virginica_species_rna-XM_022469740.1	Crassostrea_virginica_species_rna-XM_022466898.1
group39157	species_special	Bathymodiolus_platifrons_species_12140:Bpl_scaf_56526-0.1-mRNA-1
group41494	species_special	Corbicula_fluminea_species_EVM0034994.1
group20855	other_ortholog	Crassostrea_gigas_species_EVM0014030.1	Crassostrea_gigas_species_EVM0035534.1	Crassostrea_virginica_species_rna-XM_022461639.1
group22095	species_special	Bathymodiolus_platifrons_species_18455:Bpl_scaf_15114-1.5-mRNA-1	Bathymodiolus_platifrons_species_7875:Bpl_scaf_29476-2.1-mRNA-1
group3203	other_ortholog	Lottia_gigantea_species_rna-XM_009053175.1	Bathymodiolus_platifrons_species_8350:Bpl_scaf_7408-5.11-mRNA-1	Lottia_gigantea_species_rna-XM_009064727.1	Corbicula_fluminea_species_EVM0021773.1	Corbicula_fluminea_species_EVM0024319.1	Corbicula_fluminea_species_EVM0028443.1	Corbicula_fluminea_species_EVM0030927.1	Corbicula_fluminea_species_EVM0033123.1	Corbicula_fluminea_species_EVM0011893.1
group60500	species_special	Crassostrea_virginica_species_rna-XM_022445989.1
group23621	other_ortholog	Bathymodiolus_platifrons_species_16920:Bpl_scaf_61969-7.6-mRNA-1	Lottia_gigantea_species_rna-XM_009056563.1
group48995	species_special	Corbicula_fluminea_species_EVM0015958.1
group31246	species_special	Bathymodiolus_platifrons_species_1354:Bpl_scaf_10267-0.29-mRNA-1
group35287	species_special	Bathymodiolus_platifrons_species_13124:Bpl_scaf_3471-1.2-mRNA-1
group24103	species_special	Corbicula_fluminea_species_EVM0002755.1	Corbicula_fluminea_species_EVM0032059.1
group16402	species_special	Bathymodiolus_platifrons_species_1275:Bpl_scaf_11525-0.2-mRNA-1	Bathymodiolus_platifrons_species_1275:Bpl_scaf_11525-0.8-mRNA-1	Bathymodiolus_platifrons_species_886:Bpl_scaf_59672-0.4-mRNA-1
group15496	species_special	Crassostrea_gigas_species_EVM0035227.1	Crassostrea_gigas_species_EVM0040334.1	Crassostrea_gigas_species_EVM0006803.2	Crassostrea_gigas_species_EVM0036960.1
group2462	species_special	Corbicula_fluminea_species_EVM0012760.1	Corbicula_fluminea_species_EVM0037039.1	Corbicula_fluminea_species_EVM0021620.1	Corbicula_fluminea_species_EVM0038743.1	Corbicula_fluminea_species_EVM0016520.1	Corbicula_fluminea_species_EVM0024096.1	Corbicula_fluminea_species_EVM0009518.1	Corbicula_fluminea_species_EVM0018408.1	Corbicula_fluminea_species_EVM0036161.1	Corbicula_fluminea_species_EVM0028845.1	Corbicula_fluminea_species_EVM0016400.1
group46572	species_special	Corbicula_fluminea_species_EVM0031856.1
group62396	species_special	Lottia_gigantea_species_rna-XM_009048121.1
group39718	species_special	Bathymodiolus_platifrons_species_2654:Bpl_scaf_59648-7.11-mRNA-1
group28919	species_special	Crassostrea_gigas_species_EVM0003522.1	Crassostrea_gigas_species_EVM0025149.1
group68114	species_special	Lottia_gigantea_species_rna-XM_009061545.1
group56302	species_special	Crassostrea_gigas_species_EVM0054020.1
group4962	other_ortholog	Crassostrea_gigas_species_EVM0012968.1	Crassostrea_gigas_species_EVM0013571.1	Crassostrea_gigas_species_EVM0012257.1	Crassostrea_virginica_species_rna-XM_022489125.1	Crassostrea_virginica_species_rna-XM_022489129.1	Crassostrea_virginica_species_rna-XM_022489126.1	Crassostrea_virginica_species_rna-XM_022489130.1	Crassostrea_virginica_species_rna-XM_022489128.1
group36565	species_special	Bathymodiolus_platifrons_species_4062:Bpl_scaf_42343-0.6-mRNA-1
group5165	species_special	Bathymodiolus_platifrons_species_12857:Bpl_scaf_40292-0.29-mRNA-1	Bathymodiolus_platifrons_species_3025:Bpl_scaf_57247-0.12-mRNA-1	Bathymodiolus_platifrons_species_2085:Bpl_scaf_4628-0.4-mRNA-1	Bathymodiolus_platifrons_species_15696:Bpl_scaf_18323-0.5-mRNA-1	Bathymodiolus_platifrons_species_9438:Bpl_scaf_41876-0.9-mRNA-1	Bathymodiolus_platifrons_species_6445:Bpl_scaf_22547-0.3-mRNA-1	Bathymodiolus_platifrons_species_16633:Bpl_scaf_50690-0.23-mRNA-1
group20700	other_ortholog	Crassostrea_gigas_species_EVM0057925.1	Crassostrea_gigas_species_EVM0009065.1	Crassostrea_virginica_species_rna-XM_022445701.1
group70016	species_special	Lottia_gigantea_species_rna-XM_009066017.1
group35056	species_special	Bathymodiolus_platifrons_species_14049:Bpl_scaf_33261-0.6-mRNA-1
group42800	species_special	Corbicula_fluminea_species_EVM0007266.1
group66914	species_special	Lottia_gigantea_species_rna-XM_009058572.1
group45367	species_special	Corbicula_fluminea_species_EVM0027099.1
group66913	species_special	Lottia_gigantea_species_rna-XM_009058571.1
group52666	species_special	Corbicula_fluminea_species_EVM0027445.1
group3135	other_ortholog	Crassostrea_gigas_species_EVM0009599.1	Crassostrea_gigas_species_EVM0019119.1	Crassostrea_gigas_species_EVM0017196.1	Crassostrea_gigas_species_EVM0035870.1	Crassostrea_gigas_species_EVM0016825.1	Crassostrea_gigas_species_EVM0044141.1	Crassostrea_virginica_species_rna-XM_022471249.1	Crassostrea_virginica_species_rna-XM_022471250.1	Crassostrea_virginica_species_rna-XM_022471243.1	Crassostrea_virginica_species_rna-XM_022471244.1
group65854	species_special	Lottia_gigantea_species_rna-XM_009056046.1
group53832	species_special	Crassostrea_gigas_species_EVM0019661.1
group66133	species_special	Lottia_gigantea_species_rna-XM_009056727.1
group47848	species_special	Corbicula_fluminea_species_EVM0038462.1
group39855	species_special	Bathymodiolus_platifrons_species_8664:Bpl_scaf_60489-5.8-mRNA-1
group1629	multi_ortholog	Bathymodiolus_platifrons_species_4829:Bpl_scaf_21345-6.13-mRNA-1	Crassostrea_gigas_species_EVM0005906.1	Crassostrea_gigas_species_EVM0057662.1	Crassostrea_virginica_species_rna-XM_022486954.1	Corbicula_fluminea_species_EVM0009590.1	Lottia_gigantea_species_rna-XM_009061543.1	Lottia_gigantea_species_rna-XM_009047123.1	Lottia_gigantea_species_rna-XM_009055017.1	Crassostrea_gigas_species_EVM0003437.1	Crassostrea_gigas_species_EVM0033971.1	Crassostrea_virginica_species_rna-XM_022489809.1	Corbicula_fluminea_species_EVM0019175.1	Lottia_gigantea_species_rna-XM_009055018.1
group5227	species_special	Bathymodiolus_platifrons_species_6271:Bpl_scaf_14273-0.3-mRNA-1	Bathymodiolus_platifrons_species_14067:Bpl_scaf_47911-0.13-mRNA-1	Bathymodiolus_platifrons_species_2112:Bpl_scaf_62509-0.40-mRNA-1	Bathymodiolus_platifrons_species_1383:Bpl_scaf_58067-0.29-mRNA-1	Bathymodiolus_platifrons_species_4553:Bpl_scaf_43255-1.4-mRNA-1	Bathymodiolus_platifrons_species_2535:Bpl_scaf_2869-0.11-mRNA-1	Bathymodiolus_platifrons_species_11657:Bpl_scaf_32877-3.3-mRNA-1
group70256	species_special	Lottia_gigantea_species_rna-XM_009066665.1
group56081	species_special	Crassostrea_gigas_species_EVM0048812.2
group19590	other_ortholog	Crassostrea_gigas_species_EVM0033603.1	Crassostrea_gigas_species_EVM0034238.1	Crassostrea_virginica_species_rna-XM_022459982.1
group33630	species_special	Bathymodiolus_platifrons_species_9478:Bpl_scaf_24781-5.28-mRNA-1
group50354	species_special	Corbicula_fluminea_species_EVM0015055.1
group14476	species_special	Crassostrea_gigas_species_EVM0031478.1	Crassostrea_gigas_species_EVM0039232.1	Crassostrea_gigas_species_EVM0053466.1	Crassostrea_gigas_species_EVM0008137.1
group69176	species_special	Lottia_gigantea_species_rna-XM_009063908.1
group57558	species_special	Crassostrea_gigas_species_EVM0054308.1
group54076	species_special	Crassostrea_gigas_species_EVM0011422.1
group63493	species_special	Lottia_gigantea_species_rna-XM_009050569.1
group30795	species_special	Lottia_gigantea_species_rna-XM_009051156.1	Lottia_gigantea_species_rna-XM_009051157.1
group20268	other_ortholog	Crassostrea_gigas_species_EVM0023358.1	Crassostrea_gigas_species_EVM0036021.1	Crassostrea_virginica_species_rna-XM_022470585.1
group6537	other_ortholog	Corbicula_fluminea_species_EVM0001983.1	Corbicula_fluminea_species_EVM0013210.1	Crassostrea_virginica_species_rna-XM_022468726.1	Crassostrea_gigas_species_EVM0048414.1	Crassostrea_gigas_species_EVM0023509.1	Crassostrea_virginica_species_rna-XM_022466490.1	Crassostrea_virginica_species_rna-XM_022467196.1
group27444	other_ortholog	Crassostrea_gigas_species_EVM0048106.1	Crassostrea_virginica_species_rna-XM_022488263.1
group4698	species_special	Corbicula_fluminea_species_EVM0032313.1	Corbicula_fluminea_species_EVM0007495.1	Corbicula_fluminea_species_EVM0007058.1	Corbicula_fluminea_species_EVM0009858.1	Corbicula_fluminea_species_EVM0016842.1	Corbicula_fluminea_species_EVM0015123.1	Corbicula_fluminea_species_EVM0027159.1	Corbicula_fluminea_species_EVM0002954.1
group3815	other_ortholog	Crassostrea_gigas_species_EVM0009996.1	Crassostrea_gigas_species_EVM0008258.1	Crassostrea_virginica_species_rna-XM_022433160.1	Crassostrea_gigas_species_EVM0018148.1	Crassostrea_gigas_species_EVM0003382.1	Crassostrea_virginica_species_rna-XM_022432808.1	Crassostrea_virginica_species_rna-XM_022433159.1	Crassostrea_virginica_species_rna-XM_022433157.1	Crassostrea_virginica_species_rna-XM_022433158.1
group38046	species_special	Bathymodiolus_platifrons_species_12601:Bpl_scaf_51465-1.14-mRNA-1
group19210	other_ortholog	Crassostrea_gigas_species_EVM0023824.1	Crassostrea_gigas_species_EVM0012397.1	Crassostrea_virginica_species_rna-XM_022431328.1
group41534	species_special	Corbicula_fluminea_species_EVM0029957.1
group44557	species_special	Corbicula_fluminea_species_EVM0022803.1
group35545	species_special	Bathymodiolus_platifrons_species_3559:Bpl_scaf_36180-0.12-mRNA-1
group66662	species_special	Lottia_gigantea_species_rna-XM_009057977.1
group57433	species_special	Crassostrea_gigas_species_EVM0045818.1
group6527	species_special	Corbicula_fluminea_species_EVM0023877.1	Corbicula_fluminea_species_EVM0009046.1	Corbicula_fluminea_species_EVM0023511.1	Corbicula_fluminea_species_EVM0024946.1	Corbicula_fluminea_species_EVM0010869.1	Corbicula_fluminea_species_EVM0000169.1	Corbicula_fluminea_species_EVM0000427.1
group21248	species_special	Crassostrea_gigas_species_EVM0036812.1	Crassostrea_gigas_species_EVM0004317.1	Crassostrea_gigas_species_EVM0040556.1
group20356	species_special	Crassostrea_gigas_species_EVM0056782.1	Crassostrea_gigas_species_EVM0012086.1	Crassostrea_gigas_species_EVM0031733.1
group36064	species_special	Bathymodiolus_platifrons_species_6848:Bpl_scaf_39648-0.7-mRNA-1
group66505	species_special	Lottia_gigantea_species_rna-XM_009057586.1
group30829	species_special	Lottia_gigantea_species_rna-XM_009052001.1	Lottia_gigantea_species_rna-XM_009060738.1
group16438	species_special	Bathymodiolus_platifrons_species_8682:Bpl_scaf_12468-0.5-mRNA-1	Bathymodiolus_platifrons_species_4500:Bpl_scaf_50094-0.16-mRNA-1	Bathymodiolus_platifrons_species_8682:Bpl_scaf_12468-0.2-mRNA-1
group66397	species_special	Lottia_gigantea_species_rna-XM_009057316.1
group38532	species_special	Bathymodiolus_platifrons_species_15141:Bpl_scaf_54034-2.2-mRNA-1
group25989	species_special	Corbicula_fluminea_species_EVM0015830.1	Corbicula_fluminea_species_EVM0003015.1
group7175	other_ortholog	Bathymodiolus_platifrons_species_4398:Bpl_scaf_12168-4.5-mRNA-1	Crassostrea_gigas_species_EVM0041772.1	Crassostrea_virginica_species_rna-XM_022440507.1	Crassostrea_virginica_species_rna-XM_022441242.1	Crassostrea_gigas_species_EVM0022047.1	Crassostrea_gigas_species_EVM0044870.2
group35205	species_special	Bathymodiolus_platifrons_species_6574:Bpl_scaf_34315-2.12-mRNA-1
group42676	species_special	Corbicula_fluminea_species_EVM0016712.2
group36794	species_special	Bathymodiolus_platifrons_species_1510:Bpl_scaf_43972-1.5-mRNA-1
group13710	other_ortholog	Corbicula_fluminea_species_EVM0020056.1	Crassostrea_gigas_species_EVM0017738.1	Crassostrea_gigas_species_EVM0046369.1	Crassostrea_virginica_species_rna-XM_022437079.1
group4706	other_ortholog	Corbicula_fluminea_species_EVM0000228.1	Crassostrea_gigas_species_EVM0047405.1	Crassostrea_virginica_species_rna-XM_022467812.1	Crassostrea_virginica_species_rna-XM_022467837.1	Crassostrea_virginica_species_rna-XM_022467855.1	Crassostrea_virginica_species_rna-XM_022467845.1	Crassostrea_virginica_species_rna-XM_022467830.1	Crassostrea_virginica_species_rna-XM_022467822.1
group26522	other_ortholog	Crassostrea_gigas_species_EVM0047972.1	Crassostrea_virginica_species_rna-XM_022485844.1
group7558	multi_ortholog	Bathymodiolus_platifrons_species_17698:Bpl_scaf_23676-1.2-mRNA-1	Crassostrea_virginica_species_rna-XM_022473935.1	Crassostrea_gigas_species_EVM0007139.1	Crassostrea_gigas_species_EVM0050812.1	Corbicula_fluminea_species_EVM0029226.1	Lottia_gigantea_species_rna-XM_009055563.1
group40158	species_special	Bathymodiolus_platifrons_species_4963:Bpl_scaf_6196-0.5-mRNA-1
group37293	species_special	Bathymodiolus_platifrons_species_3000:Bpl_scaf_4723-0.18-mRNA-1
group3317	multi_ortholog	Bathymodiolus_platifrons_species_12799:Bpl_scaf_23805-5.14-mRNA-1	Crassostrea_gigas_species_EVM0047436.1	Corbicula_fluminea_species_EVM0028148.4	Crassostrea_virginica_species_rna-XM_022457367.1	Crassostrea_gigas_species_EVM0008502.1	Bathymodiolus_platifrons_species_12799:Bpl_scaf_23805-5.13-mRNA-1	Bathymodiolus_platifrons_species_12799:Bpl_scaf_23805-5.21-mRNA-1	Lottia_gigantea_species_rna-XM_009049622.1	Lottia_gigantea_species_rna-XM_009049621.1
group13870	other_ortholog	Corbicula_fluminea_species_EVM0028850.1	Crassostrea_gigas_species_EVM0012761.1	Crassostrea_gigas_species_EVM0009732.1	Crassostrea_virginica_species_rna-XM_022457954.1
group63030	species_special	Lottia_gigantea_species_rna-XM_009049510.1
group69330	species_special	Lottia_gigantea_species_rna-XM_009064282.1
group39896	species_special	Bathymodiolus_platifrons_species_6897:Bpl_scaf_60716-0.0-mRNA-1
group51753	species_special	Corbicula_fluminea_species_EVM0035416.2
group58479	species_special	Crassostrea_gigas_species_EVM0031530.1
group56068	species_special	Crassostrea_gigas_species_EVM0052127.1
group22534	species_special	Bathymodiolus_platifrons_species_17064:Bpl_scaf_24314-2.16-mRNA-1	Bathymodiolus_platifrons_species_11990:Bpl_scaf_24508-0.5-mRNA-1
group25079	species_special	Corbicula_fluminea_species_EVM0027698.1	Corbicula_fluminea_species_EVM0025286.1
group34056	species_special	Bathymodiolus_platifrons_species_2088:Bpl_scaf_2733-1.7-mRNA-1
group70966	species_special	Lottia_gigantea_species_rna-XM_009068288.1
group69821	species_special	Lottia_gigantea_species_rna-XM_009065563.1
group5399	multi_ortholog	Bathymodiolus_platifrons_species_539:Bpl_scaf_1989-7.3-mRNA-1	Crassostrea_virginica_species_rna-XM_022467348.1	Crassostrea_virginica_species_rna-XM_022467450.1	Crassostrea_gigas_species_EVM0009493.1	Corbicula_fluminea_species_EVM0027329.1	Lottia_gigantea_species_rna-XM_009051150.1	Crassostrea_gigas_species_EVM0024193.2
group41293	species_special	Bathymodiolus_platifrons_species_9368:Bpl_scaf_9390-0.2-mRNA-1
group36768	species_special	Bathymodiolus_platifrons_species_14885:Bpl_scaf_43856-2.8-mRNA-1
group55200	species_special	Crassostrea_gigas_species_EVM0000179.1
group5048	species_special	Crassostrea_virginica_species_rna-XM_022441080.1	Crassostrea_virginica_species_rna-XM_022441075.1	Crassostrea_virginica_species_rna-XM_022441074.1	Crassostrea_virginica_species_rna-XM_022444251.1	Crassostrea_virginica_species_rna-XM_022444250.1	Crassostrea_virginica_species_rna-XM_022441071.1	Crassostrea_virginica_species_rna-XM_022441072.1	Crassostrea_virginica_species_rna-XM_022441073.1
group29922	species_special	Crassostrea_virginica_species_rna-XM_022460561.1	Crassostrea_virginica_species_rna-XM_022463929.1
group65671	species_special	Lottia_gigantea_species_rna-XM_009055610.1
group27459	other_ortholog	Crassostrea_gigas_species_EVM0022294.1	Crassostrea_virginica_species_rna-XM_022490323.1
group12350	species_special	Crassostrea_gigas_species_EVM0051475.1	Crassostrea_gigas_species_EVM0029574.1	Crassostrea_gigas_species_EVM0029723.1	Crassostrea_gigas_species_EVM0047818.1	Crassostrea_gigas_species_EVM0003694.1
group39886	species_special	Bathymodiolus_platifrons_species_7874:Bpl_scaf_60678-0.0-mRNA-1
group35993	species_special	Bathymodiolus_platifrons_species_8146:Bpl_scaf_38804-0.2-mRNA-1
group13512	other_ortholog	Bathymodiolus_platifrons_species_12596:Bpl_scaf_713-0.8-mRNA-1	Corbicula_fluminea_species_EVM0035625.1	Corbicula_fluminea_species_EVM0019367.1	Corbicula_fluminea_species_EVM0006843.1
group25624	species_special	Corbicula_fluminea_species_EVM0037768.1	Corbicula_fluminea_species_EVM0014815.1
group6787	other_ortholog	Crassostrea_gigas_species_EVM0009491.1	Crassostrea_gigas_species_EVM0006165.1	Crassostrea_gigas_species_EVM0043678.1	Crassostrea_gigas_species_EVM0031117.1	Crassostrea_gigas_species_EVM0011077.1	Crassostrea_virginica_species_rna-XM_022449448.1	Crassostrea_virginica_species_rna-XM_022449449.1
group43541	species_special	Corbicula_fluminea_species_EVM0037114.1
group40451	species_special	Bathymodiolus_platifrons_species_1456:Bpl_scaf_63420-0.17-mRNA-1
group46095	species_special	Corbicula_fluminea_species_EVM0020652.1
group58831	species_special	Crassostrea_virginica_species_rna-XM_022479458.1
group8178	other_ortholog	Bathymodiolus_platifrons_species_5427:Bpl_scaf_45214-6.7-mRNA-1	Crassostrea_virginica_species_rna-XM_022451301.1	Crassostrea_gigas_species_EVM0038833.1	Crassostrea_gigas_species_EVM0046926.1	Corbicula_fluminea_species_EVM0020561.1	Corbicula_fluminea_species_EVM0023898.1
group55100	species_special	Crassostrea_gigas_species_EVM0017673.1
group47638	species_special	Corbicula_fluminea_species_EVM0013344.1
group50170	species_special	Corbicula_fluminea_species_EVM0026683.1
group51440	species_special	Corbicula_fluminea_species_EVM0005420.1
group5014	other_ortholog	Crassostrea_gigas_species_EVM0040934.1	Crassostrea_gigas_species_EVM0042903.1	Crassostrea_virginica_species_rna-XM_022467518.1	Crassostrea_virginica_species_rna-XM_022467519.1	Crassostrea_virginica_species_rna-XM_022468017.1	Crassostrea_virginica_species_rna-XM_022468016.1	Crassostrea_virginica_species_rna-XM_022467520.1	Crassostrea_virginica_species_rna-XM_022468018.1
group35991	species_special	Bathymodiolus_platifrons_species_3521:Bpl_scaf_38799-1.20-mRNA-1
group38172	species_special	Bathymodiolus_platifrons_species_13099:Bpl_scaf_52204-1.4-mRNA-1
group26029	species_special	Corbicula_fluminea_species_EVM0001140.1	Corbicula_fluminea_species_EVM0018510.1
group56218	species_special	Crassostrea_gigas_species_EVM0032905.1
group3466	multi_ortholog	Bathymodiolus_platifrons_species_8252:Bpl_scaf_45-1.8-mRNA-1	Corbicula_fluminea_species_EVM0012255.1	Crassostrea_virginica_species_rna-XM_022478794.1	Crassostrea_gigas_species_EVM0017696.1	Crassostrea_virginica_species_rna-XM_022479068.1	Crassostrea_virginica_species_rna-XM_022478793.1	Crassostrea_virginica_species_rna-XM_022479067.1	Lottia_gigantea_species_rna-XM_009061399.1	Crassostrea_gigas_species_EVM0039610.1
group3548	multi_ortholog	Bathymodiolus_platifrons_species_17652:Bpl_scaf_58007-6.14-mRNA-1	Crassostrea_virginica_species_rna-XM_022461810.1	Crassostrea_virginica_species_rna-XM_022461808.1	Crassostrea_virginica_species_rna-XM_022461807.1	Crassostrea_virginica_species_rna-XM_022461809.1	Crassostrea_gigas_species_EVM0048033.1	Crassostrea_gigas_species_EVM0000388.1	Corbicula_fluminea_species_EVM0014642.1	Lottia_gigantea_species_rna-XM_009056474.1
group47279	species_special	Corbicula_fluminea_species_EVM0000313.1
group14872	species_special	Crassostrea_virginica_species_rna-XM_022435259.1	Crassostrea_virginica_species_rna-XM_022435258.1	Crassostrea_virginica_species_rna-XM_022435257.1	Crassostrea_virginica_species_rna-XM_022435260.1
group21708	species_special	Lottia_gigantea_species_rna-XM_009046446.1	Lottia_gigantea_species_rna-XM_009056077.1	Lottia_gigantea_species_rna-XM_009068796.1
group3192	species_special	Crassostrea_virginica_species_rna-XM_022444330.1	Crassostrea_virginica_species_rna-XM_022444329.1	Crassostrea_virginica_species_rna-XM_022444333.1	Crassostrea_virginica_species_rna-XM_022444334.1	Crassostrea_virginica_species_rna-XM_022444331.1	Crassostrea_virginica_species_rna-XM_022444326.1	Crassostrea_virginica_species_rna-XM_022444327.1	Crassostrea_virginica_species_rna-XM_022444328.1	Crassostrea_virginica_species_rna-XM_022444336.1	Crassostrea_virginica_species_rna-XM_022444335.1
group66474	species_special	Lottia_gigantea_species_rna-XM_009057417.1
group14952	other_ortholog	Crassostrea_gigas_species_EVM0020175.1	Crassostrea_gigas_species_EVM0001446.1	Crassostrea_virginica_species_rna-XM_022433667.1	Crassostrea_virginica_species_rna-XM_022433860.1
group53612	species_special	Crassostrea_gigas_species_EVM0012808.1
group70482	species_special	Lottia_gigantea_species_rna-XM_009067186.1
group13007	species_special	Bathymodiolus_platifrons_species_6043:Bpl_scaf_23512-5.15-mRNA-1	Bathymodiolus_platifrons_species_1900:Bpl_scaf_7488-4.18-mRNA-1	Bathymodiolus_platifrons_species_7862:Bpl_scaf_45345-7.6-mRNA-1	Bathymodiolus_platifrons_species_4763:Bpl_scaf_30291-13.15-mRNA-1
group49357	species_special	Corbicula_fluminea_species_EVM0005184.1
group44306	species_special	Corbicula_fluminea_species_EVM0007322.1
group66604	species_special	Lottia_gigantea_species_rna-XM_009057826.1
group44201	species_special	Corbicula_fluminea_species_EVM0002517.1
group54467	species_special	Crassostrea_gigas_species_EVM0025160.1
group1410	other_ortholog	Bathymodiolus_platifrons_species_7778:Bpl_scaf_41549-3.13-mRNA-1	Crassostrea_virginica_species_rna-XM_022483701.1	Crassostrea_virginica_species_rna-XM_022483689.1	Crassostrea_virginica_species_rna-XM_022483684.1	Crassostrea_virginica_species_rna-XM_022483710.1	Crassostrea_gigas_species_EVM0050700.1	Crassostrea_gigas_species_EVM0029439.1	Crassostrea_gigas_species_EVM0038581.1	Crassostrea_gigas_species_EVM0007814.1	Crassostrea_gigas_species_EVM0015828.1	Crassostrea_gigas_species_EVM0011531.1	Crassostrea_virginica_species_rna-XM_022440599.1	Crassostrea_gigas_species_EVM0043099.1	Crassostrea_virginica_species_rna-XM_022440887.1
group16263	species_special	Crassostrea_virginica_species_rna-XM_022447498.1	Crassostrea_virginica_species_rna-XM_022447495.1	Crassostrea_virginica_species_rna-XM_022447496.1	Crassostrea_virginica_species_rna-XM_022447497.1
group18872	species_special	Crassostrea_gigas_species_EVM0039758.1	Crassostrea_gigas_species_EVM0024073.1	Crassostrea_gigas_species_EVM0040855.1
group27824	species_special	Crassostrea_gigas_species_EVM0022518.1	Crassostrea_gigas_species_EVM0035995.1
group32514	species_special	Bathymodiolus_platifrons_species_15412:Bpl_scaf_17793-0.0-mRNA-1
group68253	species_special	Lottia_gigantea_species_rna-XM_009061862.1
group21602	species_special	Crassostrea_virginica_species_rna-XM_022447156.1	Crassostrea_virginica_species_rna-XM_022441694.1	Crassostrea_virginica_species_rna-XM_022441695.1
group28685	species_special	Crassostrea_gigas_species_EVM0055451.1	Crassostrea_gigas_species_EVM0014105.1
group38230	species_special	Bathymodiolus_platifrons_species_4906:Bpl_scaf_52494-0.6-mRNA-1
group52854	species_special	Corbicula_fluminea_species_EVM0021862.1
group53637	species_special	Crassostrea_gigas_species_EVM0025598.1
group29283	species_special	Crassostrea_gigas_species_EVM0008934.1	Crassostrea_gigas_species_EVM0032397.1
group4196	multi_ortholog	Bathymodiolus_platifrons_species_3264:Bpl_scaf_2519-2.10-mRNA-1	Crassostrea_virginica_species_rna-XM_022458031.1	Crassostrea_gigas_species_EVM0012520.1	Crassostrea_gigas_species_EVM0037424.1	Lottia_gigantea_species_rna-XM_009064426.1	Corbicula_fluminea_species_EVM0002907.1	Corbicula_fluminea_species_EVM0026588.1	Corbicula_fluminea_species_EVM0010293.1
group30731	species_special	Lottia_gigantea_species_rna-XM_009048670.1	Lottia_gigantea_species_rna-XM_009048671.1
group30132	species_special	Crassostrea_virginica_species_rna-XM_022488855.1	Crassostrea_virginica_species_rna-XM_022488856.1
group69591	species_special	Lottia_gigantea_species_rna-XM_009064950.1
group36314	species_special	Bathymodiolus_platifrons_species_10412:Bpl_scaf_41094-9.0-mRNA-1
group30301	species_special	Crassostrea_virginica_species_rna-XM_022436159.1	Crassostrea_virginica_species_rna-XM_022438329.1
group33880	species_special	Bathymodiolus_platifrons_species_14211:Bpl_scaf_26355-0.19-mRNA-1
group42883	species_special	Corbicula_fluminea_species_EVM0037437.1
group69517	species_special	Lottia_gigantea_species_rna-XM_009064778.1
group53590	species_special	Crassostrea_gigas_species_EVM0027616.1
group11933	other_ortholog	Crassostrea_gigas_species_EVM0034062.1	Crassostrea_virginica_species_rna-XM_022485213.1	Crassostrea_virginica_species_rna-XM_022485215.1	Crassostrea_virginica_species_rna-XM_022485214.1	Crassostrea_gigas_species_EVM0052844.2
group66036	species_special	Lottia_gigantea_species_rna-XM_009056492.1
group66174	species_special	Lottia_gigantea_species_rna-XM_009056823.1
group24243	species_special	Corbicula_fluminea_species_EVM0023131.1	Corbicula_fluminea_species_EVM0001166.1
group43313	species_special	Corbicula_fluminea_species_EVM0025927.2
group14592	other_ortholog	Crassostrea_gigas_species_EVM0022151.1	Crassostrea_gigas_species_EVM0006528.1	Crassostrea_virginica_species_rna-XM_022473687.1	Crassostrea_virginica_species_rna-XM_022473851.1
group58710	species_special	Crassostrea_virginica_species_rna-XM_022441490.1
group50366	species_special	Corbicula_fluminea_species_EVM0024788.1
group47714	species_special	Corbicula_fluminea_species_EVM0034785.1
group54779	species_special	Crassostrea_gigas_species_EVM0028673.1
group7074	species_special	Crassostrea_virginica_species_rna-XM_022455971.1	Crassostrea_virginica_species_rna-XM_022455973.1	Crassostrea_virginica_species_rna-XM_022455972.1	Crassostrea_virginica_species_rna-XM_022455974.1	Crassostrea_virginica_species_rna-XM_022455896.1	Crassostrea_virginica_species_rna-XM_022455897.1	Crassostrea_virginica_species_rna-XM_022455898.1
group30531	species_special	Crassostrea_virginica_species_rna-XM_022449688.1	Crassostrea_virginica_species_rna-XM_022449689.1
group54728	species_special	Crassostrea_gigas_species_EVM0019753.1
group2457	multi_ortholog	Bathymodiolus_platifrons_species_16429:Bpl_scaf_7656-0.4-mRNA-1	Corbicula_fluminea_species_EVM0018103.1	Lottia_gigantea_species_rna-XM_009046837.1	Crassostrea_gigas_species_EVM0024764.2	Crassostrea_virginica_species_rna-XM_022465400.1	Crassostrea_virginica_species_rna-XM_022465401.1	Crassostrea_virginica_species_rna-XM_022465403.1	Crassostrea_virginica_species_rna-XM_022465398.1	Crassostrea_virginica_species_rna-XM_022465399.1	Crassostrea_gigas_species_EVM0058634.1	Crassostrea_virginica_species_rna-XM_022465402.1
group22985	species_special	Bathymodiolus_platifrons_species_9134:Bpl_scaf_37621-3.13-mRNA-1	Bathymodiolus_platifrons_species_2161:Bpl_scaf_59189-0.10-mRNA-1
group42561	species_special	Corbicula_fluminea_species_EVM0035428.1
group5060	other_ortholog	Crassostrea_gigas_species_EVM0032341.1	Crassostrea_gigas_species_EVM0045970.2	Crassostrea_gigas_species_EVM0048595.1	Crassostrea_gigas_species_EVM0014425.1	Crassostrea_virginica_species_rna-XM_022471010.1	Crassostrea_gigas_species_EVM0040131.1	Crassostrea_gigas_species_EVM0008458.1	Crassostrea_gigas_species_EVM0051906.1
group38173	species_special	Bathymodiolus_platifrons_species_10866:Bpl_scaf_52224-1.17-mRNA-1
group23494	other_ortholog	Bathymodiolus_platifrons_species_1960:Bpl_scaf_64559-0.20-mRNA-1	Crassostrea_virginica_species_rna-XM_022464421.1
group69272	species_special	Lottia_gigantea_species_rna-XM_009064123.1
group1406	multi_ortholog	Bathymodiolus_platifrons_species_1451:Bpl_scaf_27248-1.18-mRNA-1	Crassostrea_virginica_species_rna-XM_022438654.1	Crassostrea_virginica_species_rna-XM_022438653.1	Crassostrea_virginica_species_rna-XM_022438655.1	Crassostrea_virginica_species_rna-XM_022438656.1	Crassostrea_virginica_species_rna-XM_022439755.1	Crassostrea_virginica_species_rna-XM_022439753.1	Crassostrea_virginica_species_rna-XM_022439756.1	Crassostrea_virginica_species_rna-XM_022439757.1	Crassostrea_gigas_species_EVM0020047.1	Corbicula_fluminea_species_EVM0034597.1	Crassostrea_gigas_species_EVM0035329.1	Lottia_gigantea_species_rna-XM_009061906.1	Corbicula_fluminea_species_EVM0021269.1
group63360	species_special	Lottia_gigantea_species_rna-XM_009050249.1
group37143	species_special	Bathymodiolus_platifrons_species_9821:Bpl_scaf_46053-1.0-mRNA-1
group17490	species_special	Corbicula_fluminea_species_EVM0036573.1	Corbicula_fluminea_species_EVM0012232.1	Corbicula_fluminea_species_EVM0004562.1
group3866	other_ortholog	Crassostrea_gigas_species_EVM0034468.1	Crassostrea_gigas_species_EVM0026415.2	Crassostrea_virginica_species_rna-XM_022444884.1	Crassostrea_virginica_species_rna-XM_022446022.1	Crassostrea_virginica_species_rna-XM_022444882.1	Crassostrea_virginica_species_rna-XM_022446020.1	Crassostrea_virginica_species_rna-XM_022444883.1	Crassostrea_virginica_species_rna-XM_022446021.1	Crassostrea_virginica_species_rna-XM_022444885.1
group13893	species_special	Corbicula_fluminea_species_EVM0014089.1	Corbicula_fluminea_species_EVM0028126.1	Corbicula_fluminea_species_EVM0032153.1	Corbicula_fluminea_species_EVM0027080.1
group21457	species_special	Crassostrea_virginica_species_rna-XM_022485189.1	Crassostrea_virginica_species_rna-XM_022485190.1	Crassostrea_virginica_species_rna-XM_022485191.1
group6266	multi_ortholog	Bathymodiolus_platifrons_species_1694:Bpl_scaf_62418-4.18-mRNA-1	Crassostrea_gigas_species_EVM0021069.1	Crassostrea_gigas_species_EVM0036895.1	Lottia_gigantea_species_rna-XM_009061901.1	Corbicula_fluminea_species_EVM0009849.1	Crassostrea_virginica_species_rna-XM_022483281.1	Crassostrea_virginica_species_rna-XM_022483282.1
group65280	species_special	Lottia_gigantea_species_rna-XM_009054655.1
group48955	species_special	Corbicula_fluminea_species_EVM0031899.1
group55664	species_special	Crassostrea_gigas_species_EVM0051182.1
group62600	species_special	Lottia_gigantea_species_rna-XM_009048557.1
group7917	multi_ortholog	Bathymodiolus_platifrons_species_15133:Bpl_scaf_34764-1.7-mRNA-1	Crassostrea_virginica_species_rna-XM_022460764.1	Lottia_gigantea_species_rna-XM_009066906.1	Corbicula_fluminea_species_EVM0012826.1	Crassostrea_gigas_species_EVM0013895.1	Crassostrea_gigas_species_EVM0058057.1
group56649	species_special	Crassostrea_gigas_species_EVM0011145.1
group6327	species_special	Crassostrea_gigas_species_EVM0016441.1	Crassostrea_gigas_species_EVM0043857.1	Crassostrea_gigas_species_EVM0027681.1	Crassostrea_gigas_species_EVM0007103.1	Crassostrea_gigas_species_EVM0046184.1	Crassostrea_gigas_species_EVM0031033.1	Crassostrea_gigas_species_EVM0012516.1
group19254	other_ortholog	Crassostrea_gigas_species_EVM0046335.1	Crassostrea_gigas_species_EVM0057882.1	Crassostrea_virginica_species_rna-XM_022490047.1
group40267	species_special	Bathymodiolus_platifrons_species_8713:Bpl_scaf_62500-3.20-mRNA-1
group57111	species_special	Crassostrea_gigas_species_EVM0045989.1
group67944	species_special	Lottia_gigantea_species_rna-XM_009061118.1
group55098	species_special	Crassostrea_gigas_species_EVM0051138.1
group64679	species_special	Lottia_gigantea_species_rna-XM_009053325.1
group54292	species_special	Crassostrea_gigas_species_EVM0044924.1
group26896	species_special	Crassostrea_gigas_species_EVM0022943.1	Crassostrea_gigas_species_EVM0058654.1
group13304	other_ortholog	Bathymodiolus_platifrons_species_12182:Bpl_scaf_45043-0.8-mRNA-1	Crassostrea_virginica_species_rna-XM_022489720.1	Crassostrea_gigas_species_EVM0027761.1	Crassostrea_gigas_species_EVM0046721.1
group24552	species_special	Corbicula_fluminea_species_EVM0027146.1	Corbicula_fluminea_species_EVM0017282.1
group18918	other_ortholog	Crassostrea_gigas_species_EVM0005482.1	Crassostrea_gigas_species_EVM0021029.1	Crassostrea_virginica_species_rna-XM_022477239.1
group57294	species_special	Crassostrea_gigas_species_EVM0026849.1
group49746	species_special	Corbicula_fluminea_species_EVM0028536.1
group66996	species_special	Lottia_gigantea_species_rna-XM_009058788.1
group51662	species_special	Corbicula_fluminea_species_EVM0028391.1
group66436	species_special	Lottia_gigantea_species_rna-XM_009057396.1
group34512	species_special	Bathymodiolus_platifrons_species_15734:Bpl_scaf_29910-0.14-mRNA-1
group57026	species_special	Crassostrea_gigas_species_EVM0052895.1
group60013	species_special	Crassostrea_virginica_species_rna-XM_022434585.1
group5333	multi_ortholog	Bathymodiolus_platifrons_species_13315:Bpl_scaf_17128-6.6-mRNA-1	Crassostrea_gigas_species_EVM0019155.1	Crassostrea_virginica_species_rna-XM_022461335.1	Crassostrea_virginica_species_rna-XM_022461336.1	Lottia_gigantea_species_rna-XM_009047152.1	Crassostrea_gigas_species_EVM0009358.1	Corbicula_fluminea_species_EVM0017632.1
group51332	species_special	Corbicula_fluminea_species_EVM0031176.1
group12703	species_special	Bathymodiolus_platifrons_species_17648:Bpl_scaf_1057-0.8-mRNA-1	Bathymodiolus_platifrons_species_1801:Bpl_scaf_46577-3.4-mRNA-1	Bathymodiolus_platifrons_species_1801:Bpl_scaf_46577-4.8-mRNA-1	Bathymodiolus_platifrons_species_9888:Bpl_scaf_53149-2.5-mRNA-1
group64493	species_special	Lottia_gigantea_species_rna-XM_009052870.1
group45675	species_special	Corbicula_fluminea_species_EVM0012517.1
group56917	species_special	Crassostrea_gigas_species_EVM0046347.1
group5671	other_ortholog	Crassostrea_gigas_species_EVM0019652.1	Crassostrea_virginica_species_rna-XM_022479739.1	Crassostrea_virginica_species_rna-XM_022464169.1	Crassostrea_virginica_species_rna-XM_022480267.1	Crassostrea_virginica_species_rna-XM_022488484.1	Crassostrea_virginica_species_rna-XM_022453762.1	Crassostrea_virginica_species_rna-XM_022453761.1
group70303	species_special	Lottia_gigantea_species_rna-XM_009066755.1
group58578	species_special	Crassostrea_gigas_species_EVM0035533.1
group65246	species_special	Lottia_gigantea_species_rna-XM_009054587.1
group17063	species_special	Bathymodiolus_platifrons_species_9958:Bpl_scaf_4259-3.33-mRNA-1	Bathymodiolus_platifrons_species_9958:Bpl_scaf_4259-3.22-mRNA-1	Bathymodiolus_platifrons_species_9958:Bpl_scaf_4259-3.18-mRNA-1
group30813	species_special	Lottia_gigantea_species_rna-XM_009051477.1	Lottia_gigantea_species_rna-XM_009051480.1
group33750	species_special	Bathymodiolus_platifrons_species_15515:Bpl_scaf_25441-3.7-mRNA-1
group42572	species_special	Corbicula_fluminea_species_EVM0035042.1
group46703	species_special	Corbicula_fluminea_species_EVM0037186.1
group59179	species_special	Crassostrea_virginica_species_rna-XM_022466973.1
group18550	species_special	Crassostrea_gigas_species_EVM0027786.1	Crassostrea_gigas_species_EVM0016038.1	Crassostrea_gigas_species_EVM0048387.1
group18461	other_ortholog	Crassostrea_gigas_species_EVM0055861.1	Crassostrea_gigas_species_EVM0006066.1	Crassostrea_virginica_species_rna-XM_022472440.1
group32666	species_special	Bathymodiolus_platifrons_species_11846:Bpl_scaf_18893-5.8-mRNA-1
group38142	species_special	Bathymodiolus_platifrons_species_2174:Bpl_scaf_52012-4.6-mRNA-1
group47607	species_special	Corbicula_fluminea_species_EVM0011382.1
group28964	species_special	Crassostrea_gigas_species_EVM0036718.1	Crassostrea_gigas_species_EVM0029061.1
group35606	species_special	Bathymodiolus_platifrons_species_837:Bpl_scaf_36574-0.9-mRNA-1
group63379	species_special	Lottia_gigantea_species_rna-XM_009050293.1
group14438	species_special	Crassostrea_virginica_species_rna-XM_022448468.1	Crassostrea_virginica_species_rna-XM_022448469.1	Crassostrea_virginica_species_rna-XM_022464865.1	Crassostrea_virginica_species_rna-XM_022448470.1
group45099	species_special	Corbicula_fluminea_species_EVM0019866.1
group51145	species_special	Corbicula_fluminea_species_EVM0013061.1
group12290	other_ortholog	Crassostrea_gigas_species_EVM0046165.1	Crassostrea_gigas_species_EVM0014542.1	Crassostrea_virginica_species_rna-XM_022442502.1	Crassostrea_virginica_species_rna-XM_022442503.1	Crassostrea_gigas_species_EVM0020338.1
group65672	species_special	Lottia_gigantea_species_rna-XM_009055611.1
group54716	species_special	Crassostrea_gigas_species_EVM0024356.1
group8105	multi_ortholog	Bathymodiolus_platifrons_species_15252:Bpl_scaf_42709-0.11-mRNA-1	Crassostrea_virginica_species_rna-XM_022463726.1	Crassostrea_gigas_species_EVM0022629.1	Corbicula_fluminea_species_EVM0035739.1	Lottia_gigantea_species_rna-XM_009058675.1	Crassostrea_gigas_species_EVM0024943.1
group9532	other_ortholog	Crassostrea_gigas_species_EVM0049208.1	Crassostrea_gigas_species_EVM0012879.1	Crassostrea_gigas_species_EVM0032961.1	Crassostrea_gigas_species_EVM0047839.1	Crassostrea_virginica_species_rna-XM_022489338.1	Crassostrea_gigas_species_EVM0020324.1
group45032	species_special	Corbicula_fluminea_species_EVM0003070.2
group54629	species_special	Crassostrea_gigas_species_EVM0028548.1
group49413	species_special	Corbicula_fluminea_species_EVM0017033.1
group67787	species_special	Lottia_gigantea_species_rna-XM_009060733.1
group47950	species_special	Corbicula_fluminea_species_EVM0017599.1
group4514	multi_ortholog	Bathymodiolus_platifrons_species_15908:Bpl_scaf_54789-0.20-mRNA-1	Corbicula_fluminea_species_EVM0005135.1	Crassostrea_virginica_species_rna-XM_022466962.1	Crassostrea_virginica_species_rna-XM_022471719.1	Crassostrea_gigas_species_EVM0046240.1	Lottia_gigantea_species_rna-XM_009049055.1	Crassostrea_virginica_species_rna-XM_022471632.1	Crassostrea_gigas_species_EVM0007588.1
group28328	species_special	Crassostrea_gigas_species_EVM0012626.1	Crassostrea_gigas_species_EVM0039957.1
group24335	species_special	Corbicula_fluminea_species_EVM0011698.1	Corbicula_fluminea_species_EVM0034287.1
group23052	other_ortholog	Bathymodiolus_platifrons_species_14658:Bpl_scaf_4027-0.19-mRNA-1	Lottia_gigantea_species_rna-XM_009056443.1
group65931	species_special	Lottia_gigantea_species_rna-XM_009056251.1
group32079	species_special	Bathymodiolus_platifrons_species_16258:Bpl_scaf_15856-1.10-mRNA-1
group10346	species_special	Bathymodiolus_platifrons_species_8321:Bpl_scaf_5969-0.12-mRNA-1	Bathymodiolus_platifrons_species_13080:Bpl_scaf_545-0.4-mRNA-1	Bathymodiolus_platifrons_species_10834:Bpl_scaf_3476-1.14-mRNA-1	Bathymodiolus_platifrons_species_2527:Bpl_scaf_37921-0.11-mRNA-1	Bathymodiolus_platifrons_species_751:Bpl_scaf_45587-0.12-mRNA-1
group33754	species_special	Bathymodiolus_platifrons_species_15515:Bpl_scaf_25441-5.27-mRNA-1
group11354	other_ortholog	Corbicula_fluminea_species_EVM0006387.1	Corbicula_fluminea_species_EVM0001327.1	Crassostrea_gigas_species_EVM0056199.1	Crassostrea_gigas_species_EVM0034891.1	Lottia_gigantea_species_rna-XM_009067125.1
group25578	species_special	Corbicula_fluminea_species_EVM0036232.1	Corbicula_fluminea_species_EVM0018083.1
group69030	species_special	Lottia_gigantea_species_rna-XM_009063597.1
group65531	species_special	Lottia_gigantea_species_rna-XM_009055298.1
group70977	species_special	Lottia_gigantea_species_rna-XM_009068320.1
group31288	species_special	Bathymodiolus_platifrons_species_245:Bpl_scaf_10456-0.11-mRNA-1
group5152	species_special	Bathymodiolus_platifrons_species_4742:Bpl_scaf_10728-0.12-mRNA-1	Bathymodiolus_platifrons_species_3799:Bpl_scaf_24316-0.0-mRNA-1	Bathymodiolus_platifrons_species_10771:Bpl_scaf_38390-4.9-mRNA-1	Bathymodiolus_platifrons_species_5644:Bpl_scaf_20486-0.7-mRNA-1	Bathymodiolus_platifrons_species_5726:Bpl_scaf_63096-1.0-mRNA-1	Bathymodiolus_platifrons_species_6055:Bpl_scaf_44519-2.9-mRNA-1	Bathymodiolus_platifrons_species_31:Bpl_scaf_30818-0.3-mRNA-1
group33439	species_special	Bathymodiolus_platifrons_species_2328:Bpl_scaf_23804-9.8-mRNA-1
group6557	other_ortholog	Crassostrea_gigas_species_EVM0013047.1	Crassostrea_gigas_species_EVM0029379.1	Crassostrea_virginica_species_rna-XM_022484764.1	Crassostrea_virginica_species_rna-XM_022484763.1	Crassostrea_virginica_species_rna-XM_022484149.1	Crassostrea_virginica_species_rna-XM_022484148.1	Crassostrea_virginica_species_rna-XM_022484147.1
group53533	species_special	Crassostrea_gigas_species_EVM0014647.1
group40547	species_special	Bathymodiolus_platifrons_species_3121:Bpl_scaf_63854-12.57-mRNA-1
group40766	species_special	Bathymodiolus_platifrons_species_16363:Bpl_scaf_64993-0.1-mRNA-1
group13339	other_ortholog	Bathymodiolus_platifrons_species_2292:Bpl_scaf_48232-6.15-mRNA-1	Crassostrea_gigas_species_EVM0049346.1	Crassostrea_virginica_species_rna-XM_022457227.1	Lottia_gigantea_species_rna-XM_009053171.1
group5022	other_ortholog	Crassostrea_gigas_species_EVM0056405.1	Crassostrea_gigas_species_EVM0017690.1	Crassostrea_gigas_species_EVM0030370.1	Crassostrea_gigas_species_EVM0005626.1	Crassostrea_gigas_species_EVM0044919.1	Crassostrea_gigas_species_EVM0031470.1	Crassostrea_virginica_species_rna-XM_022470296.1	Crassostrea_virginica_species_rna-XM_022470297.1
group19725	other_ortholog	Crassostrea_gigas_species_EVM0036540.1	Crassostrea_gigas_species_EVM0030312.1	Crassostrea_virginica_species_rna-XM_022483255.1
group56836	species_special	Crassostrea_gigas_species_EVM0003237.1
group16480	species_special	Corbicula_fluminea_species_EVM0004046.1	Corbicula_fluminea_species_EVM0012372.1	Corbicula_fluminea_species_EVM0038411.1
group69615	species_special	Lottia_gigantea_species_rna-XM_009065011.1
group21048	other_ortholog	Crassostrea_gigas_species_EVM0038890.1	Crassostrea_gigas_species_EVM0023149.1	Crassostrea_virginica_species_rna-XM_022460677.1
group52915	species_special	Corbicula_fluminea_species_EVM0035762.1
group6702	other_ortholog	Crassostrea_gigas_species_EVM0047621.1	Crassostrea_gigas_species_EVM0012450.1	Crassostrea_gigas_species_EVM0020274.1	Crassostrea_virginica_species_rna-XM_022478513.1	Crassostrea_virginica_species_rna-XM_022447772.1	Crassostrea_gigas_species_EVM0030188.1	Crassostrea_virginica_species_rna-XM_022447297.1
group21891	species_special	Bathymodiolus_platifrons_species_15465:Bpl_scaf_10276-1.18-mRNA-1	Bathymodiolus_platifrons_species_6308:Bpl_scaf_52750-0.9-mRNA-1
group43240	species_special	Corbicula_fluminea_species_EVM0020838.1
group30043	species_special	Crassostrea_virginica_species_rna-XM_022472634.1	Crassostrea_virginica_species_rna-XM_022455453.1
group515	other_ortholog	Crassostrea_gigas_species_EVM0032544.1	Crassostrea_gigas_species_EVM0011316.1	Crassostrea_gigas_species_EVM0049791.1	Crassostrea_gigas_species_EVM0012838.1	Crassostrea_gigas_species_EVM0056496.1	Crassostrea_gigas_species_EVM0000453.1	Crassostrea_gigas_species_EVM0023637.1	Crassostrea_gigas_species_EVM0010697.1	Crassostrea_virginica_species_rna-XM_022434645.1	Crassostrea_virginica_species_rna-XM_022451860.1	Crassostrea_gigas_species_EVM0043435.1	Crassostrea_virginica_species_rna-XM_022434637.1	Crassostrea_gigas_species_EVM0024906.1	Crassostrea_gigas_species_EVM0047605.1	Crassostrea_gigas_species_EVM0036070.1	Crassostrea_virginica_species_rna-XM_022431837.1	Crassostrea_virginica_species_rna-XM_022448634.1	Crassostrea_virginica_species_rna-XM_022455691.1	Crassostrea_virginica_species_rna-XM_022455690.1	Crassostrea_virginica_species_rna-XM_022455689.1	Crassostrea_virginica_species_rna-XM_022448633.1	Crassostrea_virginica_species_rna-XM_022448635.1	Crassostrea_virginica_species_rna-XM_022455692.1
group9257	species_special	Crassostrea_gigas_species_EVM0030267.1	Crassostrea_gigas_species_EVM0031413.1	Crassostrea_gigas_species_EVM0035619.1	Crassostrea_gigas_species_EVM0010239.1	Crassostrea_gigas_species_EVM0009236.1	Crassostrea_gigas_species_EVM0026904.1
group45341	species_special	Corbicula_fluminea_species_EVM0025365.1
group34452	species_special	Bathymodiolus_platifrons_species_1130:Bpl_scaf_2955-0.2-mRNA-1
group25979	species_special	Corbicula_fluminea_species_EVM0030132.1	Corbicula_fluminea_species_EVM0006215.1
group54851	species_special	Crassostrea_gigas_species_EVM0027394.1
group51622	species_special	Corbicula_fluminea_species_EVM0008974.1
group19763	other_ortholog	Crassostrea_virginica_species_rna-XM_022467295.1	Crassostrea_gigas_species_EVM0006410.1	Crassostrea_gigas_species_EVM0020917.1
group64902	species_special	Lottia_gigantea_species_rna-XM_009053793.1
group58635	species_special	Crassostrea_virginica_species_rna-XM_022439698.1
group66161	species_special	Lottia_gigantea_species_rna-XM_009056776.1
group33118	species_special	Bathymodiolus_platifrons_species_18811:Bpl_scaf_21647-3.12-mRNA-1
group12464	other_ortholog	Crassostrea_gigas_species_EVM0045258.1	Crassostrea_virginica_species_rna-XM_022460559.1	Crassostrea_virginica_species_rna-XM_022460558.1	Crassostrea_gigas_species_EVM0003433.1	Crassostrea_virginica_species_rna-XM_022461136.1
group52664	species_special	Corbicula_fluminea_species_EVM0023863.1
group69969	species_special	Lottia_gigantea_species_rna-XM_009065911.1
group49580	species_special	Corbicula_fluminea_species_EVM0004866.1
group46212	species_special	Corbicula_fluminea_species_EVM0012865.1
group34050	species_special	Bathymodiolus_platifrons_species_10519:Bpl_scaf_27307-9.7-mRNA-1
group53124	species_special	Corbicula_fluminea_species_EVM0021066.2
group19306	other_ortholog	Crassostrea_gigas_species_EVM0038031.1	Crassostrea_gigas_species_EVM0019173.1	Crassostrea_virginica_species_rna-XM_022434927.1
group43230	species_special	Corbicula_fluminea_species_EVM0024746.1
group22014	other_ortholog	Bathymodiolus_platifrons_species_13158:Bpl_scaf_13030-1.9-mRNA-1	Crassostrea_gigas_species_EVM0030590.1
group46911	species_special	Corbicula_fluminea_species_EVM0014398.1
group19191	other_ortholog	Crassostrea_gigas_species_EVM0028596.1	Crassostrea_gigas_species_EVM0055760.1	Crassostrea_virginica_species_rna-XM_022430839.1
group69360	species_special	Lottia_gigantea_species_rna-XM_009064369.1
group45700	species_special	Corbicula_fluminea_species_EVM0003443.1
group9869	other_ortholog	Crassostrea_gigas_species_EVM0029725.1	Crassostrea_gigas_species_EVM0041003.1	Crassostrea_virginica_species_rna-XM_022463757.1	Crassostrea_virginica_species_rna-XM_022463755.1	Crassostrea_virginica_species_rna-XM_022463756.1	Crassostrea_virginica_species_rna-XM_022463758.1
group13814	species_special	Corbicula_fluminea_species_EVM0034389.1	Corbicula_fluminea_species_EVM0007627.1	Corbicula_fluminea_species_EVM0024611.1	Corbicula_fluminea_species_EVM0038405.1
group1513	other_ortholog	Crassostrea_gigas_species_EVM0051515.1	Crassostrea_gigas_species_EVM0032207.1	Crassostrea_gigas_species_EVM0038548.1	Crassostrea_gigas_species_EVM0000713.1	Crassostrea_virginica_species_rna-XM_022473681.1	Crassostrea_virginica_species_rna-XM_022473680.1	Crassostrea_virginica_species_rna-XM_022473682.1	Crassostrea_gigas_species_EVM0049586.1	Crassostrea_gigas_species_EVM0024567.1	Crassostrea_virginica_species_rna-XM_022441724.1	Crassostrea_virginica_species_rna-XM_022441723.1	Crassostrea_gigas_species_EVM0035474.1	Crassostrea_gigas_species_EVM0012803.1	Crassostrea_virginica_species_rna-XM_022445406.1
group55938	species_special	Crassostrea_gigas_species_EVM0040417.1
group8270	multi_ortholog	Bathymodiolus_platifrons_species_14610:Bpl_scaf_48789-2.7-mRNA-1	Crassostrea_gigas_species_EVM0017305.1	Crassostrea_virginica_species_rna-XM_022471721.1	Crassostrea_gigas_species_EVM0033554.1	Corbicula_fluminea_species_EVM0020477.1	Lottia_gigantea_species_rna-XM_009046740.1
group1915	multi_ortholog	Bathymodiolus_platifrons_species_8326:Bpl_scaf_21173-1.13-mRNA-1	Corbicula_fluminea_species_EVM0028743.1	Corbicula_fluminea_species_EVM0004315.1	Crassostrea_virginica_species_rna-XM_022482580.1	Crassostrea_gigas_species_EVM0019942.2	Crassostrea_gigas_species_EVM0029910.1	Corbicula_fluminea_species_EVM0006527.1	Crassostrea_virginica_species_rna-XM_022485316.1	Crassostrea_virginica_species_rna-XM_022485317.1	Lottia_gigantea_species_rna-XM_009059732.1	Lottia_gigantea_species_rna-XM_009051882.1	Crassostrea_virginica_species_rna-XM_022485318.1
group3673	other_ortholog	Corbicula_fluminea_species_EVM0002005.1	Crassostrea_virginica_species_rna-XM_022465183.1	Crassostrea_virginica_species_rna-XM_022467882.1	Crassostrea_virginica_species_rna-XM_022467883.1	Crassostrea_virginica_species_rna-XM_022467880.1	Crassostrea_virginica_species_rna-XM_022469679.1	Crassostrea_virginica_species_rna-XM_022469678.1	Crassostrea_gigas_species_EVM0052692.1	Crassostrea_gigas_species_EVM0006855.1
group35587	species_special	Bathymodiolus_platifrons_species_18827:Bpl_scaf_36436-0.15-mRNA-1
group24067	other_ortholog	Corbicula_fluminea_species_EVM0033723.1	Crassostrea_gigas_species_EVM0017452.1
group68162	species_special	Lottia_gigantea_species_rna-XM_009061643.1
group21686	species_special	Crassostrea_virginica_species_rna-XM_022455993.1	Crassostrea_virginica_species_rna-XM_022455994.1	Crassostrea_virginica_species_rna-XM_022455995.1
group65810	species_special	Lottia_gigantea_species_rna-XM_009055961.1
group30477	species_special	Crassostrea_virginica_species_rna-XM_022447149.1	Crassostrea_virginica_species_rna-XM_022447150.1
group35780	species_special	Bathymodiolus_platifrons_species_17834:Bpl_scaf_37922-3.15-mRNA-1
group16270	species_special	Crassostrea_virginica_species_rna-XM_022448166.1	Crassostrea_virginica_species_rna-XM_022448164.1	Crassostrea_virginica_species_rna-XM_022448165.1	Crassostrea_virginica_species_rna-XM_022448169.1
group43698	species_special	Corbicula_fluminea_species_EVM0030916.1
group432	other_ortholog	Crassostrea_gigas_species_EVM0004563.1	Crassostrea_gigas_species_EVM0005435.1	Crassostrea_virginica_species_rna-XM_022433881.1	Crassostrea_gigas_species_EVM0000121.1	Crassostrea_gigas_species_EVM0013854.1	Crassostrea_gigas_species_EVM0047500.1	Crassostrea_gigas_species_EVM0015977.1	Crassostrea_gigas_species_EVM0037210.1	Crassostrea_gigas_species_EVM0018093.1	Crassostrea_gigas_species_EVM0024082.1	Crassostrea_gigas_species_EVM0056185.1	Crassostrea_gigas_species_EVM0040504.1	Crassostrea_gigas_species_EVM0038357.1	Crassostrea_gigas_species_EVM0031483.1	Crassostrea_gigas_species_EVM0051013.1	Crassostrea_gigas_species_EVM0025153.1	Crassostrea_gigas_species_EVM0045429.1	Crassostrea_gigas_species_EVM0015610.1	Crassostrea_gigas_species_EVM0039936.1	Crassostrea_gigas_species_EVM0013468.1	Crassostrea_gigas_species_EVM0043119.1	Crassostrea_gigas_species_EVM0033925.1	Crassostrea_gigas_species_EVM0046253.1	Crassostrea_gigas_species_EVM0009492.1	Crassostrea_gigas_species_EVM0053815.1
group34941	species_special	Bathymodiolus_platifrons_species_318:Bpl_scaf_32399-8.6-mRNA-1
group35891	species_special	Bathymodiolus_platifrons_species_9809:Bpl_scaf_38288-4.4-mRNA-1
group8972	other_ortholog	Corbicula_fluminea_species_EVM0038400.1	Crassostrea_gigas_species_EVM0057862.1	Crassostrea_virginica_species_rna-XM_022481341.1	Crassostrea_virginica_species_rna-XM_022481333.1	Crassostrea_gigas_species_EVM0017257.1	Lottia_gigantea_species_rna-XM_009067102.1
group59477	species_special	Crassostrea_virginica_species_rna-XM_022479074.1
group42742	species_special	Corbicula_fluminea_species_EVM0034133.1
group12083	other_ortholog	Crassostrea_gigas_species_EVM0006262.1	Crassostrea_gigas_species_EVM0002200.1	Crassostrea_virginica_species_rna-XM_022490023.1	Crassostrea_virginica_species_rna-XM_022490026.1	Crassostrea_virginica_species_rna-XM_022490024.1
group39731	species_special	Bathymodiolus_platifrons_species_7970:Bpl_scaf_59661-1.4-mRNA-1
group66949	species_special	Lottia_gigantea_species_rna-XM_009058688.1
group4391	multi_ortholog	Bathymodiolus_platifrons_species_1510:Bpl_scaf_43972-3.13-mRNA-1	Corbicula_fluminea_species_EVM0035209.1	Crassostrea_virginica_species_rna-XM_022448039.1	Crassostrea_virginica_species_rna-XM_022448040.1	Lottia_gigantea_species_rna-XM_009069016.1	Crassostrea_gigas_species_EVM0038905.1	Corbicula_fluminea_species_EVM0035555.1	Crassostrea_gigas_species_EVM0027749.1
group52178	species_special	Corbicula_fluminea_species_EVM0004023.1
group69141	species_special	Lottia_gigantea_species_rna-XM_009063841.1
group32223	species_special	Bathymodiolus_platifrons_species_8312:Bpl_scaf_16599-3.8-mRNA-1
group20224	other_ortholog	Crassostrea_gigas_species_EVM0043489.1	Crassostrea_gigas_species_EVM0022568.1	Crassostrea_virginica_species_rna-XM_022470809.1
group22163	species_special	Bathymodiolus_platifrons_species_12434:Bpl_scaf_16342-6.57-mRNA-1	Bathymodiolus_platifrons_species_12434:Bpl_scaf_16342-6.58-mRNA-1
group618	other_ortholog	Corbicula_fluminea_species_EVM0003269.1	Crassostrea_virginica_species_rna-XM_022458094.1	Crassostrea_virginica_species_rna-XM_022458091.1	Crassostrea_virginica_species_rna-XM_022458088.1	Crassostrea_virginica_species_rna-XM_022458093.1	Crassostrea_virginica_species_rna-XM_022458087.1	Crassostrea_virginica_species_rna-XM_022458090.1	Crassostrea_virginica_species_rna-XM_022458085.1	Crassostrea_virginica_species_rna-XM_022458086.1	Crassostrea_virginica_species_rna-XM_022458081.1	Crassostrea_virginica_species_rna-XM_022458080.1	Crassostrea_virginica_species_rna-XM_022458083.1	Crassostrea_virginica_species_rna-XM_022458084.1	Crassostrea_virginica_species_rna-XM_022458095.1	Crassostrea_gigas_species_EVM0021439.1	Crassostrea_gigas_species_EVM0002321.8	Crassostrea_virginica_species_rna-XM_022458096.1	Crassostrea_virginica_species_rna-XM_022458079.1	Crassostrea_virginica_species_rna-XM_022458089.1	Crassostrea_virginica_species_rna-XM_022458082.1	Lottia_gigantea_species_rna-XM_009049787.1
group5467	species_special	Bathymodiolus_platifrons_species_15024:Bpl_scaf_23576-1.18-mRNA-1	Bathymodiolus_platifrons_species_5533:Bpl_scaf_40394-1.8-mRNA-1	Bathymodiolus_platifrons_species_16898:Bpl_scaf_47986-0.25-mRNA-1	Bathymodiolus_platifrons_species_169:Bpl_scaf_45598-5.12-mRNA-1	Bathymodiolus_platifrons_species_169:Bpl_scaf_45598-5.19-mRNA-1	Bathymodiolus_platifrons_species_169:Bpl_scaf_45598-5.11-mRNA-1	Bathymodiolus_platifrons_species_3024:Bpl_scaf_54291-1.21-mRNA-1
group70921	species_special	Lottia_gigantea_species_rna-XM_009068180.1
group38410	species_special	Bathymodiolus_platifrons_species_9516:Bpl_scaf_53397-0.15-mRNA-1
group37707	species_special	Bathymodiolus_platifrons_species_3741:Bpl_scaf_49373-0.7-mRNA-1
group61642	species_special	Lottia_gigantea_species_rna-XM_009046291.1
group14280	species_special	Crassostrea_gigas_species_EVM0055931.1	Crassostrea_gigas_species_EVM0056793.1	Crassostrea_gigas_species_EVM0010682.1	Crassostrea_gigas_species_EVM0012240.1
group42987	species_special	Corbicula_fluminea_species_EVM0024245.1
group51917	species_special	Corbicula_fluminea_species_EVM0018877.1
group57568	species_special	Crassostrea_gigas_species_EVM0035697.1
group58811	species_special	Crassostrea_virginica_species_rna-XM_022443343.1
group56585	species_special	Crassostrea_gigas_species_EVM0010175.1
group14076	other_ortholog	Corbicula_fluminea_species_EVM0035225.1	Crassostrea_virginica_species_rna-XM_022452988.1	Crassostrea_gigas_species_EVM0032164.1	Crassostrea_gigas_species_EVM0005491.1
group51687	species_special	Corbicula_fluminea_species_EVM0014418.1
group27640	species_special	Crassostrea_gigas_species_EVM0033200.1	Crassostrea_gigas_species_EVM0020154.1
group67191	species_special	Lottia_gigantea_species_rna-XM_009059327.1
group55455	species_special	Crassostrea_gigas_species_EVM0037112.1
group25451	species_special	Corbicula_fluminea_species_EVM0038454.1	Corbicula_fluminea_species_EVM0011417.1
group14351	other_ortholog	Crassostrea_gigas_species_EVM0051780.1	Crassostrea_virginica_species_rna-XM_022458138.1	Crassostrea_virginica_species_rna-XM_022435989.1	Crassostrea_gigas_species_EVM0003375.1
group25120	species_special	Corbicula_fluminea_species_EVM0016828.1	Corbicula_fluminea_species_EVM0012091.1
group22226	species_special	Bathymodiolus_platifrons_species_7398:Bpl_scaf_17198-3.7-mRNA-1	Bathymodiolus_platifrons_species_16398:Bpl_scaf_48682-0.18-mRNA-1
group36386	species_special	Bathymodiolus_platifrons_species_1587:Bpl_scaf_4130-0.13-mRNA-1
group9083	other_ortholog	Corbicula_fluminea_species_EVM0006018.1	Crassostrea_gigas_species_EVM0024090.1	Crassostrea_gigas_species_EVM0001827.1	Crassostrea_virginica_species_rna-XM_022431370.1	Crassostrea_virginica_species_rna-XM_022432596.1	Lottia_gigantea_species_rna-XM_009066858.1
group46600	species_special	Corbicula_fluminea_species_EVM0007922.1
group21619	species_special	Crassostrea_virginica_species_rna-XM_022450500.1	Crassostrea_virginica_species_rna-XM_022450502.1	Crassostrea_virginica_species_rna-XM_022450501.1
group63087	species_special	Lottia_gigantea_species_rna-XM_009049643.1
group26004	species_special	Corbicula_fluminea_species_EVM0029292.1	Corbicula_fluminea_species_EVM0028397.1
group7281	other_ortholog	Bathymodiolus_platifrons_species_5686:Bpl_scaf_24192-0.40-mRNA-1	Bathymodiolus_platifrons_species_9935:Bpl_scaf_17714-1.20-mRNA-1	Bathymodiolus_platifrons_species_14874:Bpl_scaf_23186-0.5-mRNA-1	Bathymodiolus_platifrons_species_15708:Bpl_scaf_20083-0.4-mRNA-1	Bathymodiolus_platifrons_species_7509:Bpl_scaf_5339-0.5-mRNA-1	Lottia_gigantea_species_rna-XM_009061098.1
group45682	species_special	Corbicula_fluminea_species_EVM0000895.1
group37162	species_special	Bathymodiolus_platifrons_species_18255:Bpl_scaf_46249-4.0-mRNA-1
group65409	species_special	Lottia_gigantea_species_rna-XM_009054965.1
group65004	species_special	Lottia_gigantea_species_rna-XM_009054063.1
group37184	species_special	Bathymodiolus_platifrons_species_6120:Bpl_scaf_46341-0.1-mRNA-1
group8382	multi_ortholog	Bathymodiolus_platifrons_species_5459:Bpl_scaf_52954-1.13-mRNA-1	Crassostrea_gigas_species_EVM0046482.1	Crassostrea_gigas_species_EVM0044224.1	Crassostrea_virginica_species_rna-XM_022475978.1	Corbicula_fluminea_species_EVM0031868.1	Lottia_gigantea_species_rna-XM_009048095.1
group70484	species_special	Lottia_gigantea_species_rna-XM_009067190.1
group57432	species_special	Crassostrea_gigas_species_EVM0055157.1
group17843	other_ortholog	Corbicula_fluminea_species_EVM0011749.1	Crassostrea_virginica_species_rna-XM_022439017.1	Lottia_gigantea_species_rna-XM_009056319.1
group61492	species_special	Lottia_gigantea_species_rna-XM_009045985.1
group23330	other_ortholog	Bathymodiolus_platifrons_species_18767:Bpl_scaf_49160-4.7-mRNA-1	Crassostrea_virginica_species_rna-XM_022448340.1
group36936	species_special	Bathymodiolus_platifrons_species_2044:Bpl_scaf_44712-0.12-mRNA-1
group40130	species_special	Bathymodiolus_platifrons_species_17399:Bpl_scaf_61879-1.36-mRNA-1
group64688	species_special	Lottia_gigantea_species_rna-XM_009053347.1
group39882	species_special	Bathymodiolus_platifrons_species_9724:Bpl_scaf_60637-0.5-mRNA-1
group55996	species_special	Crassostrea_gigas_species_EVM0024067.1
group62742	species_special	Lottia_gigantea_species_rna-XM_009048881.1
group26279	species_special	Corbicula_fluminea_species_EVM0025777.1	Corbicula_fluminea_species_EVM0006061.1
group60361	species_special	Crassostrea_virginica_species_rna-XM_022437690.1
group29784	species_special	Crassostrea_virginica_species_rna-XM_022483660.1	Crassostrea_virginica_species_rna-XM_022438277.1
group43359	species_special	Corbicula_fluminea_species_EVM0037462.1
group55165	species_special	Crassostrea_gigas_species_EVM0038587.1
group51580	species_special	Corbicula_fluminea_species_EVM0015124.1
group52425	species_special	Corbicula_fluminea_species_EVM0023042.1
group20828	other_ortholog	Crassostrea_gigas_species_EVM0038593.1	Crassostrea_gigas_species_EVM0033701.1	Crassostrea_virginica_species_rna-XM_022460153.1
group60121	species_special	Crassostrea_virginica_species_rna-XM_022431200.1
group61954	species_special	Lottia_gigantea_species_rna-XM_009047100.1
group16179	species_special	Crassostrea_virginica_species_rna-XM_022438522.1	Crassostrea_virginica_species_rna-XM_022438521.1	Crassostrea_virginica_species_rna-XM_022435583.1	Crassostrea_virginica_species_rna-XM_022435584.1
group43630	species_special	Corbicula_fluminea_species_EVM0010079.2
group39632	species_special	Bathymodiolus_platifrons_species_2161:Bpl_scaf_59189-3.12-mRNA-1
group15050	other_ortholog	Crassostrea_gigas_species_EVM0014896.1	Crassostrea_gigas_species_EVM0035604.1	Crassostrea_virginica_species_rna-XM_022488556.1	Crassostrea_virginica_species_rna-XM_022488925.1
group70064	species_special	Lottia_gigantea_species_rna-XM_009066151.1
group47611	species_special	Corbicula_fluminea_species_EVM0025949.1
group47621	species_special	Corbicula_fluminea_species_EVM0030938.1
group22278	species_special	Bathymodiolus_platifrons_species_4603:Bpl_scaf_54352-2.19-mRNA-1	Bathymodiolus_platifrons_species_7165:Bpl_scaf_42389-1.3-mRNA-1
group56886	species_special	Crassostrea_gigas_species_EVM0018986.1
group24800	species_special	Corbicula_fluminea_species_EVM0022549.1	Corbicula_fluminea_species_EVM0024190.1
group26853	species_special	Crassostrea_gigas_species_EVM0032475.1	Crassostrea_gigas_species_EVM0052747.1
group14915	other_ortholog	Crassostrea_gigas_species_EVM0000416.1	Crassostrea_gigas_species_EVM0004708.1	Crassostrea_virginica_species_rna-XM_022438107.1	Crassostrea_gigas_species_EVM0055972.1
group31961	species_special	Bathymodiolus_platifrons_species_3618:Bpl_scaf_15196-2.2-mRNA-1
group9198	species_special	Corbicula_fluminea_species_EVM0000204.1	Corbicula_fluminea_species_EVM0029189.1	Corbicula_fluminea_species_EVM0003099.1	Corbicula_fluminea_species_EVM0038755.1	Corbicula_fluminea_species_EVM0021841.1	Corbicula_fluminea_species_EVM0006920.1
group16137	species_special	Crassostrea_virginica_species_rna-XM_022479780.1	Crassostrea_virginica_species_rna-XM_022479779.1	Crassostrea_virginica_species_rna-XM_022479777.1	Crassostrea_virginica_species_rna-XM_022479781.1
group35144	species_special	Bathymodiolus_platifrons_species_9770:Bpl_scaf_33855-2.27-mRNA-1
group33088	species_special	Bathymodiolus_platifrons_species_3622:Bpl_scaf_21376-1.19-mRNA-1
group16074	species_special	Crassostrea_virginica_species_rna-XM_022472776.1	Crassostrea_virginica_species_rna-XM_022472352.1	Crassostrea_virginica_species_rna-XM_022452574.1	Crassostrea_virginica_species_rna-XM_022446895.1
group7657	multi_ortholog	Bathymodiolus_platifrons_species_1493:Bpl_scaf_26452-3.10-mRNA-1	Crassostrea_gigas_species_EVM0054093.1	Crassostrea_virginica_species_rna-XM_022464978.1	Crassostrea_gigas_species_EVM0038446.1	Corbicula_fluminea_species_EVM0007466.1	Lottia_gigantea_species_rna-XM_009049027.1
group44560	species_special	Corbicula_fluminea_species_EVM0018421.1
group447	multi_ortholog	Bathymodiolus_platifrons_species_10363:Bpl_scaf_15294-6.19-mRNA-1	Crassostrea_gigas_species_EVM0039917.1	Crassostrea_virginica_species_rna-XM_022477912.1	Crassostrea_virginica_species_rna-XM_022478256.1	Crassostrea_virginica_species_rna-XM_022478258.1	Crassostrea_virginica_species_rna-XM_022477910.1	Crassostrea_virginica_species_rna-XM_022478253.1	Crassostrea_virginica_species_rna-XM_022477911.1	Crassostrea_virginica_species_rna-XM_022477907.1	Crassostrea_virginica_species_rna-XM_022477908.1	Crassostrea_virginica_species_rna-XM_022478255.1	Crassostrea_virginica_species_rna-XM_022478251.1	Crassostrea_virginica_species_rna-XM_022478252.1	Crassostrea_virginica_species_rna-XM_022477906.1	Crassostrea_virginica_species_rna-XM_022477905.1	Crassostrea_virginica_species_rna-XM_022477904.1	Crassostrea_virginica_species_rna-XM_022478250.1	Corbicula_fluminea_species_EVM0003206.1	Corbicula_fluminea_species_EVM0030080.1	Crassostrea_virginica_species_rna-XM_022478249.1	Crassostrea_virginica_species_rna-XM_022478248.1	Crassostrea_virginica_species_rna-XM_022478257.1	Crassostrea_virginica_species_rna-XM_022477913.1	Lottia_gigantea_species_rna-XM_009063397.1
group71102	species_special	Lottia_gigantea_species_rna-XM_009068590.1
group36772	species_special	Bathymodiolus_platifrons_species_14427:Bpl_scaf_43867-2.14-mRNA-1
group66762	species_special	Lottia_gigantea_species_rna-XM_009058220.1
group27291	other_ortholog	Crassostrea_gigas_species_EVM0006716.1	Crassostrea_virginica_species_rna-XM_022475598.1
group57539	species_special	Crassostrea_gigas_species_EVM0038083.1
group64743	species_special	Lottia_gigantea_species_rna-XM_009053462.1
group65677	species_special	Lottia_gigantea_species_rna-XM_009055620.1
group58888	species_special	Crassostrea_virginica_species_rna-XM_022458407.1
group68166	species_special	Lottia_gigantea_species_rna-XM_009061648.1
group36083	species_special	Bathymodiolus_platifrons_species_18279:Bpl_scaf_39729-0.7-mRNA-1
group53732	species_special	Crassostrea_gigas_species_EVM0005034.1
group19101	other_ortholog	Crassostrea_gigas_species_EVM0001621.1	Crassostrea_gigas_species_EVM0039404.1	Crassostrea_virginica_species_rna-XM_022475990.1
group67242	species_special	Lottia_gigantea_species_rna-XM_009059445.1
group41526	species_special	Corbicula_fluminea_species_EVM0035223.1
group11590	species_special	Crassostrea_gigas_species_EVM0009927.1	Crassostrea_gigas_species_EVM0023926.1	Crassostrea_gigas_species_EVM0007668.1	Crassostrea_gigas_species_EVM0005879.1	Crassostrea_gigas_species_EVM0043736.1
group556	multi_ortholog	Crassostrea_virginica_species_rna-XM_022467657.1	Bathymodiolus_platifrons_species_17418:Bpl_scaf_54423-3.11-mRNA-1	Bathymodiolus_platifrons_species_7794:Bpl_scaf_9391-1.4-mRNA-1	Crassostrea_gigas_species_EVM0016011.1	Corbicula_fluminea_species_EVM0016172.1	Corbicula_fluminea_species_EVM0015971.1	Corbicula_fluminea_species_EVM0003617.1	Corbicula_fluminea_species_EVM0011077.1	Corbicula_fluminea_species_EVM0009057.1	Crassostrea_virginica_species_rna-XM_022467658.1	Corbicula_fluminea_species_EVM0019739.1	Corbicula_fluminea_species_EVM0033385.1	Crassostrea_gigas_species_EVM0024801.1	Crassostrea_gigas_species_EVM0004587.1	Corbicula_fluminea_species_EVM0000012.1	Crassostrea_virginica_species_rna-XM_022430468.1	Lottia_gigantea_species_rna-XM_009051200.1	Crassostrea_gigas_species_EVM0000617.1	Crassostrea_gigas_species_EVM0053476.1	Crassostrea_virginica_species_rna-XM_022430469.1	Crassostrea_gigas_species_EVM0045248.1	Lottia_gigantea_species_rna-XM_009049896.1
group68541	species_special	Lottia_gigantea_species_rna-XM_009062503.1
group17931	other_ortholog	Corbicula_fluminea_species_EVM0025462.1	Crassostrea_virginica_species_rna-XM_022469489.1	Crassostrea_gigas_species_EVM0016611.1
group30186	species_special	Crassostrea_virginica_species_rna-XM_022489140.1	Crassostrea_virginica_species_rna-XM_022489141.1
group26881	species_special	Crassostrea_gigas_species_EVM0050719.2	Crassostrea_gigas_species_EVM0031782.1
group14728	other_ortholog	Crassostrea_gigas_species_EVM0045364.1	Crassostrea_gigas_species_EVM0016858.1	Crassostrea_virginica_species_rna-XM_022488408.1	Crassostrea_virginica_species_rna-XM_022488409.1
group67721	species_special	Lottia_gigantea_species_rna-XM_009060550.1
group47911	species_special	Corbicula_fluminea_species_EVM0006274.1
group49090	species_special	Corbicula_fluminea_species_EVM0023132.1
group29029	species_special	Crassostrea_gigas_species_EVM0032305.1	Crassostrea_gigas_species_EVM0005179.1
group55705	species_special	Crassostrea_gigas_species_EVM0016470.1
group50764	species_special	Corbicula_fluminea_species_EVM0029640.1
group61739	species_special	Lottia_gigantea_species_rna-XM_009046534.1
group15334	other_ortholog	Crassostrea_gigas_species_EVM0024652.1	Crassostrea_gigas_species_EVM0025912.1	Crassostrea_virginica_species_rna-XM_022469806.1	Crassostrea_virginica_species_rna-XM_022469807.1
group22581	species_special	Bathymodiolus_platifrons_species_4147:Bpl_scaf_25182-0.0-mRNA-1	Bathymodiolus_platifrons_species_3638:Bpl_scaf_54774-0.4-mRNA-1
group61384	species_special	Lottia_gigantea_species_rna-XM_009045742.1
group58170	species_special	Crassostrea_gigas_species_EVM0003504.1
group53351	species_special	Corbicula_fluminea_species_EVM0013956.1
group64121	species_special	Lottia_gigantea_species_rna-XM_009051983.1
group46802	species_special	Corbicula_fluminea_species_EVM0033398.1
group44301	species_special	Corbicula_fluminea_species_EVM0002775.1
group1632	multi_ortholog	Bathymodiolus_platifrons_species_4091:Bpl_scaf_2322-1.15-mRNA-1	Crassostrea_virginica_species_rna-XM_022461333.1	Crassostrea_virginica_species_rna-XM_022461334.1	Crassostrea_gigas_species_EVM0043557.1	Lottia_gigantea_species_rna-XM_009049786.1	Crassostrea_gigas_species_EVM0009367.1	Lottia_gigantea_species_rna-XM_009053735.1	Corbicula_fluminea_species_EVM0010623.1	Corbicula_fluminea_species_EVM0010614.1	Corbicula_fluminea_species_EVM0026172.1	Corbicula_fluminea_species_EVM0034869.1	Corbicula_fluminea_species_EVM0005920.1	Corbicula_fluminea_species_EVM0014721.1
group44897	species_special	Corbicula_fluminea_species_EVM0025251.1
group22040	species_special	Bathymodiolus_platifrons_species_4991:Bpl_scaf_13698-7.15-mRNA-1	Bathymodiolus_platifrons_species_12462:Bpl_scaf_290-0.8-mRNA-1
group35500	species_special	Bathymodiolus_platifrons_species_17033:Bpl_scaf_35974-0.0-mRNA-1
group24859	species_special	Corbicula_fluminea_species_EVM0018201.1	Corbicula_fluminea_species_EVM0020574.1
group51020	species_special	Corbicula_fluminea_species_EVM0025065.1
group19722	species_special	Crassostrea_gigas_species_EVM0032103.1	Crassostrea_gigas_species_EVM0037253.1	Crassostrea_gigas_species_EVM0042519.1
group43169	species_special	Corbicula_fluminea_species_EVM0036719.1
group31113	species_special	Lottia_gigantea_species_rna-XM_009064350.1	Lottia_gigantea_species_rna-XM_009064351.1
group1162	other_ortholog	Crassostrea_gigas_species_EVM0003592.1	Crassostrea_gigas_species_EVM0006916.1	Crassostrea_virginica_species_rna-XM_022471877.1	Crassostrea_virginica_species_rna-XM_022464719.1	Crassostrea_virginica_species_rna-XM_022472607.1	Crassostrea_virginica_species_rna-XM_022472606.1	Crassostrea_virginica_species_rna-XM_022470590.1	Crassostrea_virginica_species_rna-XM_022470662.1	Crassostrea_virginica_species_rna-XM_022466083.1	Crassostrea_virginica_species_rna-XM_022466148.1	Crassostrea_gigas_species_EVM0023995.1	Crassostrea_gigas_species_EVM0012505.1	Crassostrea_gigas_species_EVM0049692.1	Crassostrea_gigas_species_EVM0017942.1	Crassostrea_virginica_species_rna-XM_022471959.1	Crassostrea_gigas_species_EVM0027870.1
group51579	species_special	Corbicula_fluminea_species_EVM0000124.1
group33693	species_special	Bathymodiolus_platifrons_species_834:Bpl_scaf_25028-1.13-mRNA-1
group15668	other_ortholog	Crassostrea_gigas_species_EVM0021294.1	Crassostrea_gigas_species_EVM0035659.1	Crassostrea_gigas_species_EVM0009792.1	Crassostrea_virginica_species_rna-XM_022445189.1
group55435	species_special	Crassostrea_gigas_species_EVM0033803.1
group38980	species_special	Bathymodiolus_platifrons_species_18848:Bpl_scaf_55633-6.14-mRNA-1
group52597	species_special	Corbicula_fluminea_species_EVM0004838.1
group1115	species_special	Corbicula_fluminea_species_EVM0033888.1	Corbicula_fluminea_species_EVM0014416.1	Corbicula_fluminea_species_EVM0036211.1	Corbicula_fluminea_species_EVM0009250.1	Corbicula_fluminea_species_EVM0035048.2	Corbicula_fluminea_species_EVM0029834.1	Corbicula_fluminea_species_EVM0007629.1	Corbicula_fluminea_species_EVM0011838.1	Corbicula_fluminea_species_EVM0027296.1	Corbicula_fluminea_species_EVM0015735.1	Corbicula_fluminea_species_EVM0001756.1	Corbicula_fluminea_species_EVM0017594.1	Corbicula_fluminea_species_EVM0002043.1	Corbicula_fluminea_species_EVM0007145.1	Corbicula_fluminea_species_EVM0017537.1	Corbicula_fluminea_species_EVM0006634.1
group7904	other_ortholog	Bathymodiolus_platifrons_species_1739:Bpl_scaf_34427-15.32-mRNA-1	Crassostrea_virginica_species_rna-XM_022488667.1	Crassostrea_virginica_species_rna-XM_022488668.1	Corbicula_fluminea_species_EVM0007167.1	Crassostrea_gigas_species_EVM0051355.1	Crassostrea_gigas_species_EVM0052104.1
group34425	species_special	Bathymodiolus_platifrons_species_7789:Bpl_scaf_29468-1.6-mRNA-1
group6807	other_ortholog	Crassostrea_gigas_species_EVM0042157.1	Crassostrea_gigas_species_EVM0010087.1	Crassostrea_virginica_species_rna-XM_022432355.1	Crassostrea_virginica_species_rna-XM_022432354.1	Crassostrea_gigas_species_EVM0047885.1	Crassostrea_gigas_species_EVM0022214.1	Crassostrea_gigas_species_EVM0028749.1
group58437	species_special	Crassostrea_gigas_species_EVM0036420.1
group22165	species_special	Bathymodiolus_platifrons_species_18510:Bpl_scaf_1646-0.16-mRNA-1	Bathymodiolus_platifrons_species_3075:Bpl_scaf_53809-0.4-mRNA-1
group7947	multi_ortholog	Bathymodiolus_platifrons_species_5256:Bpl_scaf_36085-2.21-mRNA-1	Crassostrea_virginica_species_rna-XM_022440260.1	Crassostrea_gigas_species_EVM0021487.1	Corbicula_fluminea_species_EVM0020268.1	Crassostrea_gigas_species_EVM0003926.1	Lottia_gigantea_species_rna-XM_009052410.1
group43639	species_special	Corbicula_fluminea_species_EVM0035523.1
group31406	species_special	Bathymodiolus_platifrons_species_1275:Bpl_scaf_11525-0.9-mRNA-1
group66984	species_special	Lottia_gigantea_species_rna-XM_009058763.1
group63432	species_special	Lottia_gigantea_species_rna-XM_009050431.1
group19385	other_ortholog	Crassostrea_gigas_species_EVM0019531.1	Crassostrea_gigas_species_EVM0000319.1	Crassostrea_virginica_species_rna-XM_022490165.1
group47527	species_special	Corbicula_fluminea_species_EVM0005061.1
group70614	species_special	Lottia_gigantea_species_rna-XM_009067510.1
group15070	other_ortholog	Crassostrea_gigas_species_EVM0054088.1	Crassostrea_gigas_species_EVM0041736.1	Crassostrea_virginica_species_rna-XM_022488477.1	Crassostrea_virginica_species_rna-XM_022488478.1
group55618	species_special	Crassostrea_gigas_species_EVM0058589.1
group69885	species_special	Lottia_gigantea_species_rna-XM_009065726.1
group34857	species_special	Bathymodiolus_platifrons_species_9234:Bpl_scaf_31793-10.11-mRNA-1
group23642	species_special	Bathymodiolus_platifrons_species_4455:Bpl_scaf_63004-2.10-mRNA-1	Bathymodiolus_platifrons_species_4240:Bpl_scaf_64136-7.4-mRNA-1
group26036	species_special	Corbicula_fluminea_species_EVM0018165.1	Corbicula_fluminea_species_EVM0034670.1
group47495	species_special	Corbicula_fluminea_species_EVM0027588.1
group22740	species_special	Bathymodiolus_platifrons_species_7242:Bpl_scaf_2971-0.17-mRNA-1	Bathymodiolus_platifrons_species_5830:Bpl_scaf_46551-0.6-mRNA-1
group40183	species_special	Bathymodiolus_platifrons_species_5176:Bpl_scaf_61985-5.23-mRNA-1
group29727	species_special	Crassostrea_virginica_species_rna-XM_022454567.1	Crassostrea_virginica_species_rna-XM_022455184.1
group67693	species_special	Lottia_gigantea_species_rna-XM_009060483.1
group23350	species_special	Bathymodiolus_platifrons_species_3261:Bpl_scaf_50011-0.0-mRNA-1	Bathymodiolus_platifrons_species_3261:Bpl_scaf_50011-0.2-mRNA-1
group62166	species_special	Lottia_gigantea_species_rna-XM_009047588.1
group8626	other_ortholog	Bathymodiolus_platifrons_species_17165:Bpl_scaf_59830-9.5-mRNA-1	Crassostrea_virginica_species_rna-XM_022488672.1	Crassostrea_gigas_species_EVM0015299.1	Corbicula_fluminea_species_EVM0017776.1	Crassostrea_gigas_species_EVM0034283.1	Crassostrea_gigas_species_EVM0058598.1
group58050	species_special	Crassostrea_gigas_species_EVM0008163.1
group55889	species_special	Crassostrea_gigas_species_EVM0028713.1
group35551	species_special	Bathymodiolus_platifrons_species_3559:Bpl_scaf_36180-5.10-mRNA-1
group65620	species_special	Lottia_gigantea_species_rna-XM_009055462.1
group70293	species_special	Lottia_gigantea_species_rna-XM_009066735.1
group30409	species_special	Crassostrea_virginica_species_rna-XM_022441485.1	Crassostrea_virginica_species_rna-XM_022446034.1
group16448	species_special	Bathymodiolus_platifrons_species_1978:Bpl_scaf_12818-0.4-mRNA-1	Bathymodiolus_platifrons_species_12835:Bpl_scaf_19600-0.8-mRNA-1	Bathymodiolus_platifrons_species_8129:Bpl_scaf_44190-0.8-mRNA-1
group68675	species_special	Lottia_gigantea_species_rna-XM_009062825.1
group18405	other_ortholog	Crassostrea_gigas_species_EVM0004014.1	Crassostrea_gigas_species_EVM0007713.1	Crassostrea_virginica_species_rna-XM_022454476.1
group25843	species_special	Corbicula_fluminea_species_EVM0006048.1	Corbicula_fluminea_species_EVM0021047.1
group32814	species_special	Bathymodiolus_platifrons_species_15214:Bpl_scaf_19731-6.22-mRNA-1
group4303	multi_ortholog	Bathymodiolus_platifrons_species_12503:Bpl_scaf_3529-0.8-mRNA-1	Crassostrea_gigas_species_EVM0055201.1	Crassostrea_virginica_species_rna-XM_022462584.1	Crassostrea_virginica_species_rna-XM_022458806.1	Crassostrea_virginica_species_rna-XM_022458807.1	Crassostrea_gigas_species_EVM0025796.1	Corbicula_fluminea_species_EVM0013457.1	Lottia_gigantea_species_rna-XM_009045640.1
group48953	species_special	Corbicula_fluminea_species_EVM0014474.1
group46830	species_special	Corbicula_fluminea_species_EVM0017696.1
group53933	species_special	Crassostrea_gigas_species_EVM0001284.1
group10401	other_ortholog	Bathymodiolus_platifrons_species_13313:Bpl_scaf_27306-1.15-mRNA-1	Corbicula_fluminea_species_EVM0026621.1	Corbicula_fluminea_species_EVM0036280.1	Lottia_gigantea_species_rna-XM_009067894.1	Corbicula_fluminea_species_EVM0036226.1
group17251	other_ortholog	Bathymodiolus_platifrons_species_13615:Bpl_scaf_61340-9.7-mRNA-1	Corbicula_fluminea_species_EVM0033986.1	Corbicula_fluminea_species_EVM0011632.1
group28250	species_special	Crassostrea_gigas_species_EVM0008261.1	Crassostrea_gigas_species_EVM0000762.1
group63863	species_special	Lottia_gigantea_species_rna-XM_009051382.1
group11268	other_ortholog	Corbicula_fluminea_species_EVM0000229.1	Crassostrea_gigas_species_EVM0049012.1	Crassostrea_virginica_species_rna-XM_022461614.1	Lottia_gigantea_species_rna-XM_009062707.1	Crassostrea_gigas_species_EVM0035687.1
group53998	species_special	Crassostrea_gigas_species_EVM0050040.1
group16898	species_special	Bathymodiolus_platifrons_species_7492:Bpl_scaf_31329-0.0-mRNA-1	Bathymodiolus_platifrons_species_17267:Bpl_scaf_31475-0.11-mRNA-1	Bathymodiolus_platifrons_species_6849:Bpl_scaf_32638-0.2-mRNA-1
group62627	species_special	Lottia_gigantea_species_rna-XM_009048618.1
group62510	species_special	Lottia_gigantea_species_rna-XM_009048365.1
group11959	other_ortholog	Crassostrea_gigas_species_EVM0011715.1	Crassostrea_gigas_species_EVM0036175.1	Crassostrea_gigas_species_EVM0019895.1	Crassostrea_gigas_species_EVM0034479.2	Crassostrea_virginica_species_rna-XM_022487798.1
group36323	species_special	Bathymodiolus_platifrons_species_1867:Bpl_scaf_41124-0.2-mRNA-1
group6786	species_special	Crassostrea_gigas_species_EVM0057209.1	Crassostrea_gigas_species_EVM0030109.1	Crassostrea_gigas_species_EVM0022114.1	Crassostrea_gigas_species_EVM0046384.1	Crassostrea_gigas_species_EVM0041494.2	Crassostrea_gigas_species_EVM0000817.1	Crassostrea_gigas_species_EVM0034835.1
group37964	species_special	Bathymodiolus_platifrons_species_17204:Bpl_scaf_50874-0.2-mRNA-1
group46836	species_special	Corbicula_fluminea_species_EVM0026291.1
group30467	species_special	Crassostrea_virginica_species_rna-XM_022442509.1	Crassostrea_virginica_species_rna-XM_022442510.1
group19511	species_special	Crassostrea_gigas_species_EVM0014466.1	Crassostrea_gigas_species_EVM0007178.1	Crassostrea_gigas_species_EVM0006449.2
group38797	species_special	Bathymodiolus_platifrons_species_4597:Bpl_scaf_54993-0.2-mRNA-1
group24424	species_special	Corbicula_fluminea_species_EVM0005093.1	Corbicula_fluminea_species_EVM0023560.1
group31749	species_special	Bathymodiolus_platifrons_species_11810:Bpl_scaf_1370-2.9-mRNA-1
group16784	species_special	Bathymodiolus_platifrons_species_4357:Bpl_scaf_25760-0.1-mRNA-1	Bathymodiolus_platifrons_species_4514:Bpl_scaf_4930-3.0-mRNA-1	Bathymodiolus_platifrons_species_10480:Bpl_scaf_56904-7.25-mRNA-1
group14713	other_ortholog	Crassostrea_gigas_species_EVM0046432.1	Crassostrea_gigas_species_EVM0041232.1	Crassostrea_virginica_species_rna-XM_022488468.1	Crassostrea_virginica_species_rna-XM_022488469.1
group14958	other_ortholog	Crassostrea_gigas_species_EVM0017773.1	Crassostrea_gigas_species_EVM0019648.1	Crassostrea_virginica_species_rna-XM_022432464.1	Crassostrea_virginica_species_rna-XM_022432465.1
group41688	species_special	Corbicula_fluminea_species_EVM0013264.1
group39935	species_special	Bathymodiolus_platifrons_species_12300:Bpl_scaf_60785-2.1-mRNA-1
group48433	species_special	Corbicula_fluminea_species_EVM0026691.1
group56005	species_special	Crassostrea_gigas_species_EVM0050007.1
group49996	species_special	Corbicula_fluminea_species_EVM0025021.1
group37399	species_special	Bathymodiolus_platifrons_species_6873:Bpl_scaf_47967-0.10-mRNA-1
group35747	species_special	Bathymodiolus_platifrons_species_2325:Bpl_scaf_37699-0.10-mRNA-1
group66923	species_special	Lottia_gigantea_species_rna-XM_009058598.1
group63263	species_special	Lottia_gigantea_species_rna-XM_009050013.1
group6893	other_ortholog	Crassostrea_gigas_species_EVM0014109.1	Crassostrea_gigas_species_EVM0002821.1	Crassostrea_virginica_species_rna-XM_022471043.1	Crassostrea_virginica_species_rna-XM_022471042.1	Crassostrea_virginica_species_rna-XM_022471041.1	Crassostrea_virginica_species_rna-XM_022466129.1	Crassostrea_virginica_species_rna-XM_022466128.1
group17455	species_special	Corbicula_fluminea_species_EVM0006686.1	Corbicula_fluminea_species_EVM0037171.1	Corbicula_fluminea_species_EVM0036873.1
group57450	species_special	Crassostrea_gigas_species_EVM0012753.1
group70166	species_special	Lottia_gigantea_species_rna-XM_009066422.1
group52283	species_special	Corbicula_fluminea_species_EVM0009727.1
group31516	species_special	Bathymodiolus_platifrons_species_16304:Bpl_scaf_12118-3.9-mRNA-1
group11	species_special	Crassostrea_virginica_species_rna-XM_022436921.1	Crassostrea_virginica_species_rna-XM_022456276.1	Crassostrea_virginica_species_rna-XM_022448014.1	Crassostrea_virginica_species_rna-XM_022449097.1	Crassostrea_virginica_species_rna-XM_022456277.1	Crassostrea_virginica_species_rna-XM_022453270.1	Crassostrea_virginica_species_rna-XM_022453269.1	Crassostrea_virginica_species_rna-XM_022447734.1	Crassostrea_virginica_species_rna-XM_022455881.1	Crassostrea_virginica_species_rna-XM_022455002.1	Crassostrea_virginica_species_rna-XM_022456390.1	Crassostrea_virginica_species_rna-XM_022437599.1	Crassostrea_virginica_species_rna-XM_022436867.1	Crassostrea_virginica_species_rna-XM_022456471.1	Crassostrea_virginica_species_rna-XM_022456389.1	Crassostrea_virginica_species_rna-XM_022456473.1	Crassostrea_virginica_species_rna-XM_022447737.1	Crassostrea_virginica_species_rna-XM_022456279.1	Crassostrea_virginica_species_rna-XM_022456280.1	Crassostrea_virginica_species_rna-XM_022456278.1	Crassostrea_virginica_species_rna-XM_022438780.1	Crassostrea_virginica_species_rna-XM_022437600.1	Crassostrea_virginica_species_rna-XM_022456107.1	Crassostrea_virginica_species_rna-XM_022456362.1	Crassostrea_virginica_species_rna-XM_022456452.1	Crassostrea_virginica_species_rna-XM_022435562.1	Crassostrea_virginica_species_rna-XM_022451996.1	Crassostrea_virginica_species_rna-XM_022456391.1	Crassostrea_virginica_species_rna-XM_022452075.1	Crassostrea_virginica_species_rna-XM_022452079.1	Crassostrea_virginica_species_rna-XM_022456478.1	Crassostrea_virginica_species_rna-XM_022456477.1	Crassostrea_virginica_species_rna-XM_022455216.1	Crassostrea_virginica_species_rna-XM_022439208.1	Crassostrea_virginica_species_rna-XM_022456304.1	Crassostrea_virginica_species_rna-XM_022456360.1	Crassostrea_virginica_species_rna-XM_022456361.1	Crassostrea_virginica_species_rna-XM_022455219.1	Crassostrea_virginica_species_rna-XM_022456302.1	Crassostrea_virginica_species_rna-XM_022456104.1	Crassostrea_virginica_species_rna-XM_022456106.1	Crassostrea_virginica_species_rna-XM_022456105.1	Crassostrea_virginica_species_rna-XM_022451670.1	Crassostrea_virginica_species_rna-XM_022454041.1	Crassostrea_virginica_species_rna-XM_022456453.1	Crassostrea_virginica_species_rna-XM_022450604.1	Crassostrea_virginica_species_rna-XM_022440667.1	Crassostrea_virginica_species_rna-XM_022456621.1
group7570	other_ortholog	Bathymodiolus_platifrons_species_13400:Bpl_scaf_23987-3.7-mRNA-1	Bathymodiolus_platifrons_species_13400:Bpl_scaf_23987-3.8-mRNA-1	Crassostrea_gigas_species_EVM0021821.1	Crassostrea_virginica_species_rna-XM_022476459.1	Corbicula_fluminea_species_EVM0014211.1	Crassostrea_gigas_species_EVM0050445.1
group28855	species_special	Crassostrea_gigas_species_EVM0024290.1	Crassostrea_gigas_species_EVM0017374.1
group39598	species_special	Bathymodiolus_platifrons_species_13485:Bpl_scaf_58986-1.13-mRNA-1
group1156	other_ortholog	Crassostrea_gigas_species_EVM0042898.1	Crassostrea_gigas_species_EVM0009153.1	Crassostrea_virginica_species_rna-XM_022488166.1	Crassostrea_virginica_species_rna-XM_022488168.1	Crassostrea_virginica_species_rna-XM_022488161.1	Crassostrea_virginica_species_rna-XM_022488159.1	Crassostrea_virginica_species_rna-XM_022488162.1	Crassostrea_virginica_species_rna-XM_022488163.1	Crassostrea_virginica_species_rna-XM_022488164.1	Crassostrea_gigas_species_EVM0007661.1	Crassostrea_gigas_species_EVM0052180.1	Crassostrea_virginica_species_rna-XM_022488169.1	Crassostrea_virginica_species_rna-XM_022488167.1	Crassostrea_virginica_species_rna-XM_022484446.1	Crassostrea_virginica_species_rna-XM_022484448.1	Crassostrea_virginica_species_rna-XM_022488165.1
group32691	species_special	Bathymodiolus_platifrons_species_6596:Bpl_scaf_18985-0.18-mRNA-1
group9916	species_special	Crassostrea_virginica_species_rna-XM_022451932.1	Crassostrea_virginica_species_rna-XM_022472784.1	Crassostrea_virginica_species_rna-XM_022439275.1	Crassostrea_virginica_species_rna-XM_022480190.1	Crassostrea_virginica_species_rna-XM_022476214.1	Crassostrea_virginica_species_rna-XM_022436807.1
group65163	species_special	Lottia_gigantea_species_rna-XM_009054388.1
group59153	species_special	Crassostrea_virginica_species_rna-XM_022466924.1
group25230	species_special	Corbicula_fluminea_species_EVM0010473.1	Corbicula_fluminea_species_EVM0030239.1
group17348	species_special	Corbicula_fluminea_species_EVM0017498.1	Corbicula_fluminea_species_EVM0012662.1	Corbicula_fluminea_species_EVM0024833.1
group66654	species_special	Lottia_gigantea_species_rna-XM_009057967.1
group62540	species_special	Lottia_gigantea_species_rna-XM_009048419.1
group26058	species_special	Corbicula_fluminea_species_EVM0022455.1	Corbicula_fluminea_species_EVM0014154.1
group2643	other_ortholog	Crassostrea_gigas_species_EVM0011149.1	Crassostrea_virginica_species_rna-XM_022451671.1	Crassostrea_virginica_species_rna-XM_022485277.1	Crassostrea_virginica_species_rna-XM_022451663.1	Crassostrea_virginica_species_rna-XM_022484419.1	Crassostrea_virginica_species_rna-XM_022451650.1	Crassostrea_virginica_species_rna-XM_022451659.1	Crassostrea_virginica_species_rna-XM_022451681.1	Crassostrea_virginica_species_rna-XM_022482760.1	Crassostrea_virginica_species_rna-XM_022483551.1	Crassostrea_virginica_species_rna-XM_022486118.1
group68979	species_special	Lottia_gigantea_species_rna-XM_009063475.1
group56989	species_special	Crassostrea_gigas_species_EVM0058172.1
group46257	species_special	Corbicula_fluminea_species_EVM0003550.1
group65139	species_special	Lottia_gigantea_species_rna-XM_009054317.1
group22703	species_special	Bathymodiolus_platifrons_species_17430:Bpl_scaf_28769-0.0-mRNA-1	Bathymodiolus_platifrons_species_9616:Bpl_scaf_56471-0.0-mRNA-1
group27932	species_special	Crassostrea_gigas_species_EVM0024427.1	Crassostrea_gigas_species_EVM0042827.2
group27940	species_special	Crassostrea_gigas_species_EVM0052453.1	Crassostrea_gigas_species_EVM0035434.1
group32044	species_special	Bathymodiolus_platifrons_species_17566:Bpl_scaf_15772-1.1-mRNA-1
group46845	species_special	Corbicula_fluminea_species_EVM0025073.1
group52091	species_special	Corbicula_fluminea_species_EVM0005911.1
group10298	species_special	Bathymodiolus_platifrons_species_18406:Bpl_scaf_21453-2.39-mRNA-1	Bathymodiolus_platifrons_species_18175:Bpl_scaf_25605-4.11-mRNA-1	Bathymodiolus_platifrons_species_16746:Bpl_scaf_3367-5.9-mRNA-1	Bathymodiolus_platifrons_species_30:Bpl_scaf_7788-0.4-mRNA-1	Bathymodiolus_platifrons_species_1885:Bpl_scaf_34414-0.6-mRNA-1
group19934	other_ortholog	Crassostrea_gigas_species_EVM0022479.1	Crassostrea_gigas_species_EVM0008269.1	Crassostrea_virginica_species_rna-XM_022489905.1
group24060	species_special	Corbicula_fluminea_species_EVM0018115.1	Corbicula_fluminea_species_EVM0028454.1
group48429	species_special	Corbicula_fluminea_species_EVM0018970.1
group59046	species_special	Crassostrea_virginica_species_rna-XM_022462858.1
group31511	species_special	Bathymodiolus_platifrons_species_258:Bpl_scaf_12052-0.6-mRNA-1
group29852	species_special	Crassostrea_virginica_species_rna-XM_022436060.1	Crassostrea_virginica_species_rna-XM_022436068.1
group67891	species_special	Lottia_gigantea_species_rna-XM_009060993.1
group12605	species_special	Crassostrea_virginica_species_rna-XM_022445980.1	Crassostrea_virginica_species_rna-XM_022445981.1	Crassostrea_virginica_species_rna-XM_022440993.1	Crassostrea_virginica_species_rna-XM_022440994.1	Crassostrea_virginica_species_rna-XM_022440995.1
group17358	species_special	Corbicula_fluminea_species_EVM0022596.1	Corbicula_fluminea_species_EVM0001917.1	Corbicula_fluminea_species_EVM0003363.1
group33471	species_special	Bathymodiolus_platifrons_species_12240:Bpl_scaf_23882-4.3-mRNA-1
group22208	species_special	Bathymodiolus_platifrons_species_16380:Bpl_scaf_17051-13.14-mRNA-1	Bathymodiolus_platifrons_species_12563:Bpl_scaf_28956-4.13-mRNA-1
group66347	species_special	Lottia_gigantea_species_rna-XM_009057203.1
group33463	species_special	Bathymodiolus_platifrons_species_12407:Bpl_scaf_23841-4.21-mRNA-1
group41507	species_special	Corbicula_fluminea_species_EVM0011493.1
group56643	species_special	Crassostrea_gigas_species_EVM0020101.1
group18048	other_ortholog	Corbicula_fluminea_species_EVM0005497.1	Lottia_gigantea_species_rna-XM_009060663.1	Lottia_gigantea_species_rna-XM_009064754.1
group27747	other_ortholog	Crassostrea_gigas_species_EVM0016488.1	Crassostrea_virginica_species_rna-XM_022437583.1
group36790	species_special	Bathymodiolus_platifrons_species_12211:Bpl_scaf_43966-0.2-mRNA-1
group8131	other_ortholog	Bathymodiolus_platifrons_species_16772:Bpl_scaf_44118-4.18-mRNA-1	Crassostrea_virginica_species_rna-XM_022436332.1	Crassostrea_gigas_species_EVM0012888.1	Crassostrea_gigas_species_EVM0032389.1	Crassostrea_virginica_species_rna-XM_022436340.1	Crassostrea_virginica_species_rna-XM_022436352.1
group22764	other_ortholog	Bathymodiolus_platifrons_species_2199:Bpl_scaf_30366-0.19-mRNA-1	Lottia_gigantea_species_rna-XM_009060664.1
group32643	species_special	Bathymodiolus_platifrons_species_6692:Bpl_scaf_18682-1.24-mRNA-1
group28503	species_special	Crassostrea_gigas_species_EVM0032622.1	Crassostrea_gigas_species_EVM0016908.1
group46563	species_special	Corbicula_fluminea_species_EVM0011361.1
group42763	species_special	Corbicula_fluminea_species_EVM0027205.1
group43962	species_special	Corbicula_fluminea_species_EVM0010326.1
group55255	species_special	Crassostrea_gigas_species_EVM0001910.1
group16519	species_special	Bathymodiolus_platifrons_species_1579:Bpl_scaf_15801-8.13-mRNA-1	Bathymodiolus_platifrons_species_17098:Bpl_scaf_25191-2.15-mRNA-1	Bathymodiolus_platifrons_species_5924:Bpl_scaf_60726-5.1-mRNA-1
group17315	species_special	Corbicula_fluminea_species_EVM0003264.1	Corbicula_fluminea_species_EVM0012631.1	Corbicula_fluminea_species_EVM0025318.1
group7602	multi_ortholog	Bathymodiolus_platifrons_species_10802:Bpl_scaf_24764-0.0-mRNA-1	Lottia_gigantea_species_rna-XM_009049418.1	Crassostrea_gigas_species_EVM0019787.1	Corbicula_fluminea_species_EVM0016667.1	Crassostrea_virginica_species_rna-XM_022468131.1	Crassostrea_gigas_species_EVM0045547.1
group35242	species_special	Bathymodiolus_platifrons_species_1739:Bpl_scaf_34427-8.9-mRNA-1
group2637	other_ortholog	Crassostrea_gigas_species_EVM0055191.1	Crassostrea_gigas_species_EVM0037537.1	Crassostrea_virginica_species_rna-XM_022462461.1	Crassostrea_virginica_species_rna-XM_022457700.1	Crassostrea_virginica_species_rna-XM_022463357.1	Crassostrea_virginica_species_rna-XM_022457699.1	Crassostrea_gigas_species_EVM0026556.1	Crassostrea_gigas_species_EVM0006964.1	Crassostrea_virginica_species_rna-XM_022463739.1	Crassostrea_virginica_species_rna-XM_022461891.1	Crassostrea_virginica_species_rna-XM_022462522.1
group41468	species_special	Corbicula_fluminea_species_EVM0019452.1
group15794	other_ortholog	Crassostrea_gigas_species_EVM0022239.1	Crassostrea_gigas_species_EVM0047355.1	Crassostrea_virginica_species_rna-XM_022457916.1	Crassostrea_virginica_species_rna-XM_022457229.1
group41767	species_special	Corbicula_fluminea_species_EVM0024369.1
group24789	species_special	Corbicula_fluminea_species_EVM0026124.1	Corbicula_fluminea_species_EVM0007679.1
group58080	species_special	Crassostrea_gigas_species_EVM0045990.1
group39860	species_special	Bathymodiolus_platifrons_species_11390:Bpl_scaf_60525-0.1-mRNA-1
group63713	species_special	Lottia_gigantea_species_rna-XM_009051182.1
group51026	species_special	Corbicula_fluminea_species_EVM0007695.1
group64301	species_special	Lottia_gigantea_species_rna-XM_009052438.1
group58045	species_special	Crassostrea_gigas_species_EVM0016323.1
group38087	species_special	Bathymodiolus_platifrons_species_12883:Bpl_scaf_51655-0.17-mRNA-1
group47616	species_special	Corbicula_fluminea_species_EVM0028085.1
group41434	species_special	Corbicula_fluminea_species_EVM0000970.1
group47019	species_special	Corbicula_fluminea_species_EVM0030877.1
group70697	species_special	Lottia_gigantea_species_rna-XM_009067706.1
group50236	species_special	Corbicula_fluminea_species_EVM0002221.1
group456	multi_ortholog	Bathymodiolus_platifrons_species_1739:Bpl_scaf_34427-9.6-mRNA-1	Corbicula_fluminea_species_EVM0005488.1	Corbicula_fluminea_species_EVM0017884.1	Corbicula_fluminea_species_EVM0000599.1	Crassostrea_gigas_species_EVM0020920.1	Corbicula_fluminea_species_EVM0010253.1	Corbicula_fluminea_species_EVM0003856.1	Crassostrea_virginica_species_rna-XM_022477492.1	Lottia_gigantea_species_rna-XM_009061410.1	Lottia_gigantea_species_rna-XM_009050532.1	Bathymodiolus_platifrons_species_13467:Bpl_scaf_40569-4.22-mRNA-1	Lottia_gigantea_species_rna-XM_009067342.1	Bathymodiolus_platifrons_species_8754:Bpl_scaf_5334-1.21-mRNA-1	Lottia_gigantea_species_rna-XM_009061409.1	Crassostrea_gigas_species_EVM0054524.1	Crassostrea_gigas_species_EVM0047157.1	Crassostrea_virginica_species_rna-XM_022474863.1	Bathymodiolus_platifrons_species_8328:Bpl_scaf_63861-0.6-mRNA-1	Crassostrea_gigas_species_EVM0002485.1	Corbicula_fluminea_species_EVM0009654.1	Crassostrea_gigas_species_EVM0029024.1	Crassostrea_virginica_species_rna-XM_022477011.1	Crassostrea_gigas_species_EVM0005154.1	Corbicula_fluminea_species_EVM0013730.1
group51854	species_special	Corbicula_fluminea_species_EVM0004247.1
group171	other_ortholog	Corbicula_fluminea_species_EVM0002402.1	Corbicula_fluminea_species_EVM0001517.1	Corbicula_fluminea_species_EVM0006427.1	Corbicula_fluminea_species_EVM0007725.1	Corbicula_fluminea_species_EVM0026965.1	Corbicula_fluminea_species_EVM0035321.1	Corbicula_fluminea_species_EVM0011352.1	Corbicula_fluminea_species_EVM0027984.1	Corbicula_fluminea_species_EVM0003781.1	Corbicula_fluminea_species_EVM0007081.1	Corbicula_fluminea_species_EVM0011272.1	Corbicula_fluminea_species_EVM0021739.1	Corbicula_fluminea_species_EVM0008284.1	Corbicula_fluminea_species_EVM0029815.1	Crassostrea_gigas_species_EVM0039967.1	Crassostrea_gigas_species_EVM0009209.1	Crassostrea_virginica_species_rna-XM_022452439.1	Crassostrea_gigas_species_EVM0007838.1	Corbicula_fluminea_species_EVM0002685.1	Corbicula_fluminea_species_EVM0036533.1	Crassostrea_gigas_species_EVM0007702.1	Crassostrea_virginica_species_rna-XM_022451862.1	Crassostrea_gigas_species_EVM0048889.1	Crassostrea_gigas_species_EVM0049371.1	Crassostrea_virginica_species_rna-XM_022445156.1	Crassostrea_gigas_species_EVM0028137.1	Crassostrea_gigas_species_EVM0038069.1	Crassostrea_gigas_species_EVM0042650.1	Crassostrea_gigas_species_EVM0040770.1	Crassostrea_gigas_species_EVM0040042.1	Crassostrea_gigas_species_EVM0009147.1	Crassostrea_gigas_species_EVM0037635.1	Crassostrea_gigas_species_EVM0057317.1	Crassostrea_gigas_species_EVM0012122.1	Crassostrea_gigas_species_EVM0057152.1	Crassostrea_virginica_species_rna-XM_022480226.1
group9084	species_special	Corbicula_fluminea_species_EVM0013243.1	Corbicula_fluminea_species_EVM0015950.1	Corbicula_fluminea_species_EVM0009401.1	Corbicula_fluminea_species_EVM0033885.1	Corbicula_fluminea_species_EVM0005830.1	Corbicula_fluminea_species_EVM0003671.1
group22081	species_special	Bathymodiolus_platifrons_species_8722:Bpl_scaf_14560-1.10-mRNA-1	Bathymodiolus_platifrons_species_10519:Bpl_scaf_27307-9.6-mRNA-1
group24985	species_special	Corbicula_fluminea_species_EVM0031844.1	Corbicula_fluminea_species_EVM0029353.2
group24136	species_special	Corbicula_fluminea_species_EVM0006784.1	Corbicula_fluminea_species_EVM0024735.1
group13458	other_ortholog	Bathymodiolus_platifrons_species_15749:Bpl_scaf_61139-0.0-mRNA-1	Crassostrea_virginica_species_rna-XM_022486421.1	Crassostrea_gigas_species_EVM0047482.1	Crassostrea_gigas_species_EVM0051370.1
group4870	other_ortholog	Crassostrea_gigas_species_EVM0046503.1	Crassostrea_gigas_species_EVM0013608.1	Crassostrea_gigas_species_EVM0021161.1	Crassostrea_gigas_species_EVM0053903.1	Crassostrea_virginica_species_rna-XM_022478977.1	Crassostrea_virginica_species_rna-XM_022487998.1	Crassostrea_virginica_species_rna-XM_022487989.1	Crassostrea_virginica_species_rna-XM_022476017.1
group65051	species_special	Lottia_gigantea_species_rna-XM_009054141.1
group4218	multi_ortholog	Bathymodiolus_platifrons_species_3038:Bpl_scaf_27805-12.13-mRNA-1	Crassostrea_virginica_species_rna-XM_022473651.1	Crassostrea_virginica_species_rna-XM_022473802.1	Crassostrea_virginica_species_rna-XM_022473801.1	Crassostrea_gigas_species_EVM0047697.1	Corbicula_fluminea_species_EVM0034747.1	Crassostrea_gigas_species_EVM0025279.1	Lottia_gigantea_species_rna-XM_009050376.1
group9347	species_special	Crassostrea_gigas_species_EVM0027056.1	Crassostrea_gigas_species_EVM0034922.1	Crassostrea_gigas_species_EVM0050047.1	Crassostrea_gigas_species_EVM0010145.1	Crassostrea_gigas_species_EVM0033325.1	Crassostrea_gigas_species_EVM0009603.1
group43205	species_special	Corbicula_fluminea_species_EVM0015009.1
group67225	species_special	Lottia_gigantea_species_rna-XM_009059419.1
group56368	species_special	Crassostrea_gigas_species_EVM0012887.1
group2780	multi_ortholog	Bathymodiolus_platifrons_species_10804:Bpl_scaf_28865-1.2-mRNA-1	Bathymodiolus_platifrons_species_5547:Bpl_scaf_55686-0.2-mRNA-1	Crassostrea_gigas_species_EVM0002136.1	Crassostrea_gigas_species_EVM0021369.1	Crassostrea_virginica_species_rna-XM_022478358.1	Crassostrea_virginica_species_rna-XM_022478357.1	Crassostrea_virginica_species_rna-XM_022478359.1	Crassostrea_virginica_species_rna-XM_022478356.1	Lottia_gigantea_species_rna-XM_009066568.1	Corbicula_fluminea_species_EVM0020062.1
group20237	other_ortholog	Crassostrea_gigas_species_EVM0016068.1	Crassostrea_gigas_species_EVM0030691.1	Crassostrea_virginica_species_rna-XM_022465484.1
group34862	species_special	Bathymodiolus_platifrons_species_3193:Bpl_scaf_31818-0.6-mRNA-1
group19251	other_ortholog	Crassostrea_gigas_species_EVM0034362.1	Crassostrea_gigas_species_EVM0000392.1	Crassostrea_virginica_species_rna-XM_022487202.1
group16785	species_special	Bathymodiolus_platifrons_species_7848:Bpl_scaf_25766-2.12-mRNA-1	Bathymodiolus_platifrons_species_18634:Bpl_scaf_50065-1.3-mRNA-1	Bathymodiolus_platifrons_species_6810:Bpl_scaf_61901-1.0-mRNA-1
group18402	species_special	Crassostrea_gigas_species_EVM0049740.1	Crassostrea_gigas_species_EVM0041458.1	Crassostrea_gigas_species_EVM0023140.1
group26825	species_special	Crassostrea_gigas_species_EVM0035423.1	Crassostrea_gigas_species_EVM0054455.1
group63496	species_special	Lottia_gigantea_species_rna-XM_009050577.1
group20212	other_ortholog	Crassostrea_gigas_species_EVM0030557.1	Crassostrea_gigas_species_EVM0036591.1	Crassostrea_virginica_species_rna-XM_022470008.1
group2994	species_special	Corbicula_fluminea_species_EVM0011989.1	Corbicula_fluminea_species_EVM0029497.1	Corbicula_fluminea_species_EVM0009699.1	Corbicula_fluminea_species_EVM0031915.1	Corbicula_fluminea_species_EVM0024191.1	Corbicula_fluminea_species_EVM0022751.1	Corbicula_fluminea_species_EVM0032951.1	Corbicula_fluminea_species_EVM0034495.1	Corbicula_fluminea_species_EVM0023504.1	Corbicula_fluminea_species_EVM0037110.1
group50315	species_special	Corbicula_fluminea_species_EVM0017244.1
group4202	multi_ortholog	Bathymodiolus_platifrons_species_13540:Bpl_scaf_25767-10.4-mRNA-1	Lottia_gigantea_species_rna-XM_009067167.1	Corbicula_fluminea_species_EVM0000990.1	Corbicula_fluminea_species_EVM0002178.1	Crassostrea_virginica_species_rna-XM_022469901.1	Crassostrea_virginica_species_rna-XM_022469982.1	Crassostrea_gigas_species_EVM0032201.1	Crassostrea_gigas_species_EVM0015099.1
group54387	species_special	Crassostrea_gigas_species_EVM0007453.1
group63407	species_special	Lottia_gigantea_species_rna-XM_009050368.1
group55458	species_special	Crassostrea_gigas_species_EVM0050415.1
group27991	species_special	Crassostrea_gigas_species_EVM0029042.1	Crassostrea_gigas_species_EVM0047524.1
group12620	species_special	Crassostrea_virginica_species_rna-XM_022449392.1	Crassostrea_virginica_species_rna-XM_022453727.1	Crassostrea_virginica_species_rna-XM_022453730.1	Crassostrea_virginica_species_rna-XM_022453729.1	Crassostrea_virginica_species_rna-XM_022453728.1
group67947	species_special	Lottia_gigantea_species_rna-XM_009061127.1
group70967	species_special	Lottia_gigantea_species_rna-XM_009068290.1
group22368	species_special	Bathymodiolus_platifrons_species_2299:Bpl_scaf_20631-1.9-mRNA-1	Bathymodiolus_platifrons_species_13155:Bpl_scaf_38389-0.0-mRNA-1
group40269	species_special	Bathymodiolus_platifrons_species_8713:Bpl_scaf_62500-5.5-mRNA-1
group30061	species_special	Crassostrea_virginica_species_rna-XM_022478843.1	Crassostrea_virginica_species_rna-XM_022478844.1
group14465	species_special	Crassostrea_gigas_species_EVM0056991.1	Crassostrea_gigas_species_EVM0052797.1	Crassostrea_gigas_species_EVM0053909.1	Crassostrea_gigas_species_EVM0026547.1
group58169	species_special	Crassostrea_gigas_species_EVM0003270.1
group66739	species_special	Lottia_gigantea_species_rna-XM_009058170.1
group3252	other_ortholog	Bathymodiolus_platifrons_species_15628:Bpl_scaf_15983-4.23-mRNA-1	Bathymodiolus_platifrons_species_6113:Bpl_scaf_42354-1.6-mRNA-1	Bathymodiolus_platifrons_species_15108:Bpl_scaf_7257-0.8-mRNA-1	Bathymodiolus_platifrons_species_3835:Bpl_scaf_32686-0.8-mRNA-1	Corbicula_fluminea_species_EVM0025108.1	Corbicula_fluminea_species_EVM0032942.1	Corbicula_fluminea_species_EVM0027968.1	Crassostrea_virginica_species_rna-XM_022479285.1	Crassostrea_virginica_species_rna-XM_022479286.1
group60646	species_special	Crassostrea_virginica_species_rna-XM_022445446.1
group5120	species_special	Lottia_gigantea_species_rna-XM_009045434.1	Lottia_gigantea_species_rna-XM_009045437.1	Lottia_gigantea_species_rna-XM_009060154.1	Lottia_gigantea_species_rna-XM_009062858.1	Lottia_gigantea_species_rna-XM_009067756.1	Lottia_gigantea_species_rna-XM_009045439.1	Lottia_gigantea_species_rna-XM_009057038.1	Lottia_gigantea_species_rna-XM_009049210.1
group34	multi_ortholog	Corbicula_fluminea_species_EVM0038457.1	Corbicula_fluminea_species_EVM0024897.1	Corbicula_fluminea_species_EVM0037796.1	Lottia_gigantea_species_rna-XM_009054454.1	Crassostrea_virginica_species_rna-XM_022488951.1	Corbicula_fluminea_species_EVM0001806.1	Corbicula_fluminea_species_EVM0038486.1	Bathymodiolus_platifrons_species_11846:Bpl_scaf_18893-5.88-mRNA-1	Corbicula_fluminea_species_EVM0017284.1	Lottia_gigantea_species_rna-XM_009068013.1	Lottia_gigantea_species_rna-XM_009055691.1	Lottia_gigantea_species_rna-XM_009064504.1	Bathymodiolus_platifrons_species_11846:Bpl_scaf_18893-5.7-mRNA-1	Corbicula_fluminea_species_EVM0030574.1	Lottia_gigantea_species_rna-XM_009068014.1	Bathymodiolus_platifrons_species_11846:Bpl_scaf_18893-5.11-mRNA-1	Corbicula_fluminea_species_EVM0014178.1	Lottia_gigantea_species_rna-XM_009068023.1	Bathymodiolus_platifrons_species_119:Bpl_scaf_46023-5.41-mRNA-1	Bathymodiolus_platifrons_species_13263:Bpl_scaf_30210-0.23-mRNA-1	Bathymodiolus_platifrons_species_4293:Bpl_scaf_38703-10.8-mRNA-1	Crassostrea_gigas_species_EVM0052156.1	Crassostrea_virginica_species_rna-XM_022468511.1	Corbicula_fluminea_species_EVM0035023.1	Bathymodiolus_platifrons_species_11648:Bpl_scaf_63690-3.77-mRNA-1	Crassostrea_gigas_species_EVM0012794.1	Bathymodiolus_platifrons_species_2650:Bpl_scaf_53892-0.9-mRNA-1	Lottia_gigantea_species_rna-XM_009051179.1	Lottia_gigantea_species_rna-XM_009051903.1	Lottia_gigantea_species_rna-XM_009067478.1	Corbicula_fluminea_species_EVM0008851.1	Corbicula_fluminea_species_EVM0026783.1	Corbicula_fluminea_species_EVM0029393.1	Corbicula_fluminea_species_EVM0010854.1	Corbicula_fluminea_species_EVM0026763.1	Corbicula_fluminea_species_EVM0002930.1	Lottia_gigantea_species_rna-XM_009051174.1	Lottia_gigantea_species_rna-XM_009055410.1	Lottia_gigantea_species_rna-XM_009061799.1	Lottia_gigantea_species_rna-XM_009050379.1	Lottia_gigantea_species_rna-XM_009050382.1	Lottia_gigantea_species_rna-XM_009060387.1	Lottia_gigantea_species_rna-XM_009060388.1	Lottia_gigantea_species_rna-XM_009065880.1	Lottia_gigantea_species_rna-XM_009065882.1	Lottia_gigantea_species_rna-XM_009061797.1	Lottia_gigantea_species_rna-XM_009061660.1	Corbicula_fluminea_species_EVM0027550.1
group27656	other_ortholog	Crassostrea_gigas_species_EVM0013418.1	Crassostrea_virginica_species_rna-XM_022437806.1
group33731	species_special	Bathymodiolus_platifrons_species_17098:Bpl_scaf_25191-1.14-mRNA-1
group9962	species_special	Crassostrea_virginica_species_rna-XM_022432781.1	Crassostrea_virginica_species_rna-XM_022456150.1	Crassostrea_virginica_species_rna-XM_022456149.1	Crassostrea_virginica_species_rna-XM_022456863.1	Crassostrea_virginica_species_rna-XM_022456864.1	Crassostrea_virginica_species_rna-XM_022451897.1
group942	multi_ortholog	Bathymodiolus_platifrons_species_16624:Bpl_scaf_15945-0.9-mRNA-1	Crassostrea_gigas_species_EVM0009442.1	Crassostrea_gigas_species_EVM0038492.1	Crassostrea_virginica_species_rna-XM_022435565.1	Crassostrea_virginica_species_rna-XM_022438031.1	Lottia_gigantea_species_rna-XM_009052503.1	Corbicula_fluminea_species_EVM0027850.1	Lottia_gigantea_species_rna-XM_009047305.1	Lottia_gigantea_species_rna-XM_009066943.1	Corbicula_fluminea_species_EVM0011262.1	Crassostrea_gigas_species_EVM0026264.1	Crassostrea_gigas_species_EVM0045434.1	Corbicula_fluminea_species_EVM0004953.1	Corbicula_fluminea_species_EVM0003970.1	Corbicula_fluminea_species_EVM0026767.1	Crassostrea_gigas_species_EVM0037780.1	Crassostrea_gigas_species_EVM0050939.1
group10614	other_ortholog	Bathymodiolus_platifrons_species_5441:Bpl_scaf_39475-4.8-mRNA-1	Lottia_gigantea_species_rna-XM_009064379.1	Crassostrea_gigas_species_EVM0017958.1	Corbicula_fluminea_species_EVM0012114.1	Crassostrea_gigas_species_EVM0045766.1
group36660	species_special	Bathymodiolus_platifrons_species_6626:Bpl_scaf_43097-1.3-mRNA-1
group8702	multi_ortholog	Bathymodiolus_platifrons_species_9907:Bpl_scaf_62441-5.6-mRNA-1	Crassostrea_gigas_species_EVM0009814.1	Crassostrea_gigas_species_EVM0016835.1	Crassostrea_virginica_species_rna-XM_022472774.1	Lottia_gigantea_species_rna-XM_009046053.1	Corbicula_fluminea_species_EVM0026363.1
group51281	species_special	Corbicula_fluminea_species_EVM0018787.1
group29489	species_special	Crassostrea_gigas_species_EVM0025050.1	Crassostrea_gigas_species_EVM0037567.1
group45986	species_special	Corbicula_fluminea_species_EVM0030602.1
group14895	species_special	Crassostrea_gigas_species_EVM0008105.1	Crassostrea_gigas_species_EVM0046196.1	Crassostrea_gigas_species_EVM0047110.1	Crassostrea_gigas_species_EVM0053124.1
group34470	species_special	Bathymodiolus_platifrons_species_10356:Bpl_scaf_29696-1.23-mRNA-1
group12927	species_special	Bathymodiolus_platifrons_species_6596:Bpl_scaf_18985-0.40-mRNA-1	Bathymodiolus_platifrons_species_10557:Bpl_scaf_49017-1.18-mRNA-1	Bathymodiolus_platifrons_species_10557:Bpl_scaf_49017-1.45-mRNA-1	Bathymodiolus_platifrons_species_10557:Bpl_scaf_49017-1.43-mRNA-1
group33608	species_special	Bathymodiolus_platifrons_species_14775:Bpl_scaf_24592-0.48-mRNA-1
group40863	species_special	Bathymodiolus_platifrons_species_18208:Bpl_scaf_65581-2.20-mRNA-1
group23413	other_ortholog	Bathymodiolus_platifrons_species_13302:Bpl_scaf_52731-6.6-mRNA-1	Lottia_gigantea_species_rna-XM_009060866.1
group47671	species_special	Corbicula_fluminea_species_EVM0031505.1
group70829	species_special	Lottia_gigantea_species_rna-XM_009067963.1
group61039	species_special	Crassostrea_virginica_species_rna-XM_022452593.1
group38121	species_special	Bathymodiolus_platifrons_species_3253:Bpl_scaf_51882-2.15-mRNA-1
group35230	species_special	Bathymodiolus_platifrons_species_1885:Bpl_scaf_34414-3.15-mRNA-1
group45403	species_special	Corbicula_fluminea_species_EVM0016889.1
group43128	species_special	Corbicula_fluminea_species_EVM0003014.1
group49449	species_special	Corbicula_fluminea_species_EVM0008087.1
group43456	species_special	Corbicula_fluminea_species_EVM0035122.1
group30287	species_special	Crassostrea_virginica_species_rna-XM_022434816.1	Crassostrea_virginica_species_rna-XM_022434826.1
group5611	multi_ortholog	Bathymodiolus_platifrons_species_4763:Bpl_scaf_30291-20.21-mRNA-1	Crassostrea_virginica_species_rna-XM_022444418.1	Crassostrea_virginica_species_rna-XM_022444280.1	Corbicula_fluminea_species_EVM0026220.1	Lottia_gigantea_species_rna-XM_009062204.1	Crassostrea_gigas_species_EVM0053293.1	Crassostrea_gigas_species_EVM0030396.1
group34355	species_special	Bathymodiolus_platifrons_species_3073:Bpl_scaf_29032-0.11-mRNA-1
group53761	species_special	Crassostrea_gigas_species_EVM0042525.1
group17461	species_special	Corbicula_fluminea_species_EVM0017075.1	Corbicula_fluminea_species_EVM0014075.2	Corbicula_fluminea_species_EVM0038329.1
group9560	species_special	Crassostrea_gigas_species_EVM0009050.1	Crassostrea_gigas_species_EVM0037514.1	Crassostrea_gigas_species_EVM0025849.1	Crassostrea_gigas_species_EVM0049817.1	Crassostrea_gigas_species_EVM0038009.1	Crassostrea_gigas_species_EVM0047295.1
group17436	species_special	Corbicula_fluminea_species_EVM0011351.1	Corbicula_fluminea_species_EVM0012802.1	Corbicula_fluminea_species_EVM0018521.1
group17589	species_special	Corbicula_fluminea_species_EVM0020861.1	Corbicula_fluminea_species_EVM0030423.1	Corbicula_fluminea_species_EVM0015727.1
group61640	species_special	Lottia_gigantea_species_rna-XM_009046286.1
group38805	species_special	Bathymodiolus_platifrons_species_6705:Bpl_scaf_55004-2.8-mRNA-1
group14591	other_ortholog	Crassostrea_gigas_species_EVM0052680.1	Crassostrea_gigas_species_EVM0046639.1	Crassostrea_virginica_species_rna-XM_022475927.1	Crassostrea_virginica_species_rna-XM_022478325.1
group20196	other_ortholog	Crassostrea_gigas_species_EVM0009301.1	Crassostrea_gigas_species_EVM0018751.1	Crassostrea_virginica_species_rna-XM_022464567.1
group49445	species_special	Corbicula_fluminea_species_EVM0005303.1
group51067	species_special	Corbicula_fluminea_species_EVM0006833.1
group68109	species_special	Lottia_gigantea_species_rna-XM_009061534.1
group27285	species_special	Crassostrea_gigas_species_EVM0042037.1	Crassostrea_gigas_species_EVM0038362.1
group56423	species_special	Crassostrea_gigas_species_EVM0004286.2
group57146	species_special	Crassostrea_gigas_species_EVM0018303.1
group43579	species_special	Corbicula_fluminea_species_EVM0004269.1
group19881	other_ortholog	Crassostrea_gigas_species_EVM0039047.1	Crassostrea_gigas_species_EVM0011847.1	Crassostrea_virginica_species_rna-XM_022486412.1
group44717	species_special	Corbicula_fluminea_species_EVM0020505.1
group31989	species_special	Bathymodiolus_platifrons_species_13364:Bpl_scaf_15282-8.12-mRNA-1
group42989	species_special	Corbicula_fluminea_species_EVM0003683.1
group34976	species_special	Bathymodiolus_platifrons_species_9284:Bpl_scaf_32549-3.54-mRNA-1
group13068	other_ortholog	Bathymodiolus_platifrons_species_1316:Bpl_scaf_25972-2.10-mRNA-1	Crassostrea_virginica_species_rna-XM_022457521.1	Crassostrea_gigas_species_EVM0018451.1	Crassostrea_gigas_species_EVM0058506.1
group62200	species_special	Lottia_gigantea_species_rna-XM_009047675.1
group15969	other_ortholog	Crassostrea_gigas_species_EVM0003945.1	Crassostrea_gigas_species_EVM0011678.1	Crassostrea_virginica_species_rna-XM_022459903.1	Crassostrea_virginica_species_rna-XM_022457467.1
group16081	other_ortholog	Crassostrea_virginica_species_rna-XM_022465294.1	Lottia_gigantea_species_rna-XM_009049355.1	Lottia_gigantea_species_rna-XM_009062223.1	Lottia_gigantea_species_rna-XM_009062443.1
group3771	other_ortholog	Crassostrea_gigas_species_EVM0004384.1	Crassostrea_virginica_species_rna-XM_022477313.1	Crassostrea_virginica_species_rna-XM_022477552.1	Crassostrea_virginica_species_rna-XM_022477551.1	Crassostrea_virginica_species_rna-XM_022477312.1	Crassostrea_virginica_species_rna-XM_022477316.1	Crassostrea_virginica_species_rna-XM_022477554.1	Crassostrea_virginica_species_rna-XM_022477553.1	Crassostrea_virginica_species_rna-XM_022477315.1
group33702	species_special	Bathymodiolus_platifrons_species_9439:Bpl_scaf_25048-2.11-mRNA-1
group35973	species_special	Bathymodiolus_platifrons_species_17782:Bpl_scaf_38731-0.49-mRNA-1
group35778	species_special	Bathymodiolus_platifrons_species_17834:Bpl_scaf_37922-2.18-mRNA-1
group5310	species_special	Bathymodiolus_platifrons_species_6813:Bpl_scaf_16621-10.12-mRNA-1	Bathymodiolus_platifrons_species_129:Bpl_scaf_38784-6.15-mRNA-1	Bathymodiolus_platifrons_species_13910:Bpl_scaf_48023-0.10-mRNA-1	Bathymodiolus_platifrons_species_3986:Bpl_scaf_52808-0.33-mRNA-1	Bathymodiolus_platifrons_species_11161:Bpl_scaf_17641-13.4-mRNA-1	Bathymodiolus_platifrons_species_4219:Bpl_scaf_45908-3.2-mRNA-1	Bathymodiolus_platifrons_species_16097:Bpl_scaf_49393-0.3-mRNA-1
group10783	single_ortholog	Bathymodiolus_platifrons_species_5595:Bpl_scaf_51980-4.6-mRNA-1	Crassostrea_gigas_species_EVM0022327.1	Crassostrea_virginica_species_rna-XM_022473280.1	Corbicula_fluminea_species_EVM0011730.1	Lottia_gigantea_species_rna-XM_009062803.1
group28867	species_special	Crassostrea_gigas_species_EVM0036647.1	Crassostrea_gigas_species_EVM0001630.1
group8577	multi_ortholog	Bathymodiolus_platifrons_species_13599:Bpl_scaf_58133-1.21-mRNA-1	Crassostrea_gigas_species_EVM0047391.1	Corbicula_fluminea_species_EVM0007399.2	Crassostrea_gigas_species_EVM0009758.1	Crassostrea_virginica_species_rna-XM_022467569.1	Lottia_gigantea_species_rna-XM_009060443.1
group49297	species_special	Corbicula_fluminea_species_EVM0028337.1
group45239	species_special	Corbicula_fluminea_species_EVM0012889.1
group52982	species_special	Corbicula_fluminea_species_EVM0035002.1
group57171	species_special	Crassostrea_gigas_species_EVM0009733.1
group41888	species_special	Corbicula_fluminea_species_EVM0036894.1
group61611	species_special	Lottia_gigantea_species_rna-XM_009046230.1
group29507	species_special	Crassostrea_gigas_species_EVM0052800.1	Crassostrea_gigas_species_EVM0002937.1
group19058	other_ortholog	Crassostrea_gigas_species_EVM0030133.1	Crassostrea_gigas_species_EVM0048019.1	Crassostrea_virginica_species_rna-XM_022475610.1
group22708	other_ortholog	Bathymodiolus_platifrons_species_8145:Bpl_scaf_28870-1.8-mRNA-1	Lottia_gigantea_species_rna-XM_009053058.1
group20137	other_ortholog	Crassostrea_gigas_species_EVM0036825.1	Crassostrea_gigas_species_EVM0040443.1	Crassostrea_virginica_species_rna-XM_022467139.1
group39757	species_special	Bathymodiolus_platifrons_species_17165:Bpl_scaf_59830-9.6-mRNA-1
group5703	multi_ortholog	Bathymodiolus_platifrons_species_13107:Bpl_scaf_35263-0.2-mRNA-1	Crassostrea_gigas_species_EVM0002176.1	Crassostrea_virginica_species_rna-XM_022489571.1	Corbicula_fluminea_species_EVM0002386.1	Crassostrea_gigas_species_EVM0001725.1	Corbicula_fluminea_species_EVM0004660.1	Lottia_gigantea_species_rna-XM_009053621.1
group43028	species_special	Corbicula_fluminea_species_EVM0028818.1
group46098	species_special	Corbicula_fluminea_species_EVM0037062.1
group71161	species_special	Lottia_gigantea_species_rna-XM_009068712.1
group50511	species_special	Corbicula_fluminea_species_EVM0037714.1
group7619	multi_ortholog	Bathymodiolus_platifrons_species_8422:Bpl_scaf_24996-17.6-mRNA-1	Crassostrea_gigas_species_EVM0015909.1	Corbicula_fluminea_species_EVM0031951.1	Crassostrea_gigas_species_EVM0018308.1	Crassostrea_virginica_species_rna-XM_022490151.1	Lottia_gigantea_species_rna-XM_009060513.1
group66097	species_special	Lottia_gigantea_species_rna-XM_009056614.1
group57552	species_special	Crassostrea_gigas_species_EVM0007483.1
group65186	species_special	Lottia_gigantea_species_rna-XM_009054434.1
group34147	species_special	Bathymodiolus_platifrons_species_18458:Bpl_scaf_28186-0.11-mRNA-1
group46879	species_special	Corbicula_fluminea_species_EVM0020647.1
group8766	multi_ortholog	Bathymodiolus_platifrons_species_2695:Bpl_scaf_64798-0.6-mRNA-1	Crassostrea_gigas_species_EVM0002763.1	Crassostrea_virginica_species_rna-XM_022476391.1	Crassostrea_gigas_species_EVM0022590.1	Corbicula_fluminea_species_EVM0002774.1	Lottia_gigantea_species_rna-XM_009054572.1
group16209	species_special	Crassostrea_virginica_species_rna-XM_022438104.1	Crassostrea_virginica_species_rna-XM_022438103.1	Crassostrea_virginica_species_rna-XM_022436314.1	Crassostrea_virginica_species_rna-XM_022436317.1
group6575	species_special	Corbicula_fluminea_species_EVM0012559.1	Corbicula_fluminea_species_EVM0033814.1	Corbicula_fluminea_species_EVM0012282.1	Corbicula_fluminea_species_EVM0024676.1	Corbicula_fluminea_species_EVM0008896.1	Corbicula_fluminea_species_EVM0007818.1	Corbicula_fluminea_species_EVM0022373.1
group63852	species_special	Lottia_gigantea_species_rna-XM_009051358.1
group67555	species_special	Lottia_gigantea_species_rna-XM_009060193.1
group19234	species_special	Crassostrea_virginica_species_rna-XM_022463970.1	Crassostrea_virginica_species_rna-XM_022463971.1	Crassostrea_virginica_species_rna-XM_022463973.1
group46438	species_special	Corbicula_fluminea_species_EVM0000539.1
group47726	species_special	Corbicula_fluminea_species_EVM0024663.1
group68265	species_special	Lottia_gigantea_species_rna-XM_009061886.1
group23536	species_special	Bathymodiolus_platifrons_species_11078:Bpl_scaf_5707-4.11-mRNA-1	Bathymodiolus_platifrons_species_11078:Bpl_scaf_5707-5.2-mRNA-1
group17091	species_special	Bathymodiolus_platifrons_species_703:Bpl_scaf_44507-2.14-mRNA-1	Bathymodiolus_platifrons_species_703:Bpl_scaf_44507-2.16-mRNA-1	Bathymodiolus_platifrons_species_11370:Bpl_scaf_52916-0.2-mRNA-1
group55520	species_special	Crassostrea_gigas_species_EVM0005059.1
group30282	species_special	Crassostrea_virginica_species_rna-XM_022433206.1	Crassostrea_virginica_species_rna-XM_022433205.1
group29192	species_special	Crassostrea_gigas_species_EVM0023349.1	Crassostrea_gigas_species_EVM0021976.1
group43032	species_special	Corbicula_fluminea_species_EVM0008484.1
group3157	other_ortholog	Crassostrea_gigas_species_EVM0014278.1	Crassostrea_gigas_species_EVM0021923.1	Crassostrea_virginica_species_rna-XM_022445639.1	Crassostrea_virginica_species_rna-XM_022445640.1	Crassostrea_virginica_species_rna-XM_022445641.1	Crassostrea_virginica_species_rna-XM_022445642.1	Crassostrea_virginica_species_rna-XM_022446592.1	Crassostrea_virginica_species_rna-XM_022446594.1	Crassostrea_virginica_species_rna-XM_022446591.1	Crassostrea_virginica_species_rna-XM_022446593.1
group61621	species_special	Lottia_gigantea_species_rna-XM_009046245.1
group50296	species_special	Corbicula_fluminea_species_EVM0013334.1
group65651	species_special	Lottia_gigantea_species_rna-XM_009055570.1
group68766	species_special	Lottia_gigantea_species_rna-XM_009063039.1
group62459	species_special	Lottia_gigantea_species_rna-XM_009048270.1
group63149	species_special	Lottia_gigantea_species_rna-XM_009049751.1
group35210	species_special	Bathymodiolus_platifrons_species_6574:Bpl_scaf_34315-5.28-mRNA-1
group35836	species_special	Bathymodiolus_platifrons_species_8420:Bpl_scaf_38107-0.8-mRNA-1
group30112	species_special	Crassostrea_virginica_species_rna-XM_022484460.1	Crassostrea_virginica_species_rna-XM_022484459.1
group65302	species_special	Lottia_gigantea_species_rna-XM_009054709.1
group39958	species_special	Bathymodiolus_platifrons_species_2339:Bpl_scaf_6090-9.1-mRNA-1
group26496	other_ortholog	Crassostrea_gigas_species_EVM0040851.1	Crassostrea_virginica_species_rna-XM_022478528.1
group16393	species_special	Bathymodiolus_platifrons_species_8386:Bpl_scaf_11137-0.9-mRNA-1	Bathymodiolus_platifrons_species_15581:Bpl_scaf_62839-0.19-mRNA-1	Bathymodiolus_platifrons_species_14589:Bpl_scaf_57976-0.13-mRNA-1
group3367	other_ortholog	Bathymodiolus_platifrons_species_4763:Bpl_scaf_30291-21.10-mRNA-1	Crassostrea_virginica_species_rna-XM_022442622.1	Crassostrea_virginica_species_rna-XM_022442620.1	Crassostrea_virginica_species_rna-XM_022442619.1	Crassostrea_virginica_species_rna-XM_022442618.1	Crassostrea_virginica_species_rna-XM_022442617.1	Crassostrea_virginica_species_rna-XM_022442616.1	Crassostrea_gigas_species_EVM0011600.1	Crassostrea_gigas_species_EVM0046649.1
group8009	multi_ortholog	Bathymodiolus_platifrons_species_4293:Bpl_scaf_38703-6.10-mRNA-1	Crassostrea_gigas_species_EVM0009103.1	Crassostrea_gigas_species_EVM0016770.1	Crassostrea_virginica_species_rna-XM_022466306.1	Lottia_gigantea_species_rna-XM_009046636.1	Corbicula_fluminea_species_EVM0023213.1
group16231	species_special	Crassostrea_virginica_species_rna-XM_022446957.1	Crassostrea_virginica_species_rna-XM_022446958.1	Crassostrea_virginica_species_rna-XM_022444343.1	Crassostrea_virginica_species_rna-XM_022444344.1
group2677	species_special	Bathymodiolus_platifrons_species_191:Bpl_scaf_10809-1.5-mRNA-1	Bathymodiolus_platifrons_species_13396:Bpl_scaf_63069-2.6-mRNA-1	Bathymodiolus_platifrons_species_15240:Bpl_scaf_61278-0.11-mRNA-1	Bathymodiolus_platifrons_species_6528:Bpl_scaf_11663-3.2-mRNA-1	Bathymodiolus_platifrons_species_18657:Bpl_scaf_33596-5.0-mRNA-1	Bathymodiolus_platifrons_species_13395:Bpl_scaf_50919-15.5-mRNA-1	Bathymodiolus_platifrons_species_12335:Bpl_scaf_39122-0.2-mRNA-1	Bathymodiolus_platifrons_species_9603:Bpl_scaf_48954-1.7-mRNA-1	Bathymodiolus_platifrons_species_662:Bpl_scaf_54083-0.7-mRNA-1	Bathymodiolus_platifrons_species_1361:Bpl_scaf_52918-0.8-mRNA-1
group42379	species_special	Corbicula_fluminea_species_EVM0035007.1
group18470	other_ortholog	Crassostrea_gigas_species_EVM0023992.1	Crassostrea_virginica_species_rna-XM_022456070.1	Crassostrea_gigas_species_EVM0030933.1
group52357	species_special	Corbicula_fluminea_species_EVM0034636.1
group9475	other_ortholog	Crassostrea_gigas_species_EVM0029881.3	Crassostrea_gigas_species_EVM0029375.1	Crassostrea_virginica_species_rna-XM_022478351.1	Crassostrea_virginica_species_rna-XM_022478352.1	Crassostrea_virginica_species_rna-XM_022478349.1	Crassostrea_virginica_species_rna-XM_022478350.1
group65853	species_special	Lottia_gigantea_species_rna-XM_009056045.1
group67645	species_special	Lottia_gigantea_species_rna-XM_009060390.1
group44795	species_special	Corbicula_fluminea_species_EVM0024791.1
group50715	species_special	Corbicula_fluminea_species_EVM0014325.1
group10937	other_ortholog	Bathymodiolus_platifrons_species_15934:Bpl_scaf_59670-2.7-mRNA-1	Crassostrea_gigas_species_EVM0005910.1	Crassostrea_gigas_species_EVM0024426.1	Corbicula_fluminea_species_EVM0030637.1	Crassostrea_virginica_species_rna-XM_022457277.1
group44831	species_special	Corbicula_fluminea_species_EVM0013789.2
group27427	species_special	Crassostrea_gigas_species_EVM0017509.1	Crassostrea_gigas_species_EVM0042992.1
group43071	species_special	Corbicula_fluminea_species_EVM0008619.2
group32405	species_special	Bathymodiolus_platifrons_species_13315:Bpl_scaf_17128-2.11-mRNA-1
group24005	species_special	Corbicula_fluminea_species_EVM0013435.1	Corbicula_fluminea_species_EVM0014842.1
group67137	species_special	Lottia_gigantea_species_rna-XM_009059182.1
group33821	species_special	Bathymodiolus_platifrons_species_14670:Bpl_scaf_2581-4.10-mRNA-1
group26266	other_ortholog	Corbicula_fluminea_species_EVM0006296.1	Lottia_gigantea_species_rna-XM_009069119.1
group32331	species_special	Bathymodiolus_platifrons_species_730:Bpl_scaf_16961-4.6-mRNA-1
group31234	species_special	Bathymodiolus_platifrons_species_2244:Bpl_scaf_10139-17.6-mRNA-1
group47820	species_special	Corbicula_fluminea_species_EVM0001334.1
group7618	multi_ortholog	Bathymodiolus_platifrons_species_8422:Bpl_scaf_24996-15.7-mRNA-1	Crassostrea_virginica_species_rna-XM_022467254.1	Lottia_gigantea_species_rna-XM_009045429.1	Corbicula_fluminea_species_EVM0032250.1	Crassostrea_gigas_species_EVM0013118.1	Crassostrea_gigas_species_EVM0018713.1
group3366	other_ortholog	Bathymodiolus_platifrons_species_17231:Bpl_scaf_30264-1.9-mRNA-1	Crassostrea_virginica_species_rna-XM_022442251.1	Crassostrea_virginica_species_rna-XM_022445890.1	Crassostrea_gigas_species_EVM0021573.1	Corbicula_fluminea_species_EVM0005095.2	Crassostrea_gigas_species_EVM0002527.1	Crassostrea_gigas_species_EVM0058514.1	Crassostrea_gigas_species_EVM0038120.1	Crassostrea_gigas_species_EVM0055483.1
group30344	species_special	Crassostrea_virginica_species_rna-XM_022438822.1	Crassostrea_virginica_species_rna-XM_022438823.1
group56252	species_special	Crassostrea_gigas_species_EVM0040866.1
group42551	species_special	Corbicula_fluminea_species_EVM0013438.1
group61900	species_special	Lottia_gigantea_species_rna-XM_009046975.1
group58182	species_special	Crassostrea_gigas_species_EVM0023867.1
group29167	species_special	Crassostrea_gigas_species_EVM0058286.1	Crassostrea_gigas_species_EVM0040113.1
group24344	species_special	Corbicula_fluminea_species_EVM0035669.1	Corbicula_fluminea_species_EVM0012065.1
group11889	other_ortholog	Crassostrea_gigas_species_EVM0026642.1	Crassostrea_gigas_species_EVM0002221.1	Crassostrea_virginica_species_rna-XM_022488141.1	Crassostrea_virginica_species_rna-XM_022488143.1	Crassostrea_virginica_species_rna-XM_022488142.1
group53869	species_special	Crassostrea_gigas_species_EVM0004031.1
group14149	species_special	Crassostrea_gigas_species_EVM0007218.1	Crassostrea_gigas_species_EVM0007550.1	Crassostrea_gigas_species_EVM0050440.1	Crassostrea_gigas_species_EVM0047175.1
group14369	species_special	Crassostrea_gigas_species_EVM0035595.1	Crassostrea_gigas_species_EVM0057403.1	Crassostrea_gigas_species_EVM0056346.1	Crassostrea_gigas_species_EVM0045394.1
group35730	species_special	Bathymodiolus_platifrons_species_5325:Bpl_scaf_37612-0.8-mRNA-1
group11327	other_ortholog	Corbicula_fluminea_species_EVM0005763.2	Lottia_gigantea_species_rna-XM_009066800.1	Crassostrea_virginica_species_rna-XM_022460347.1	Crassostrea_gigas_species_EVM0034434.1	Crassostrea_gigas_species_EVM0005961.1
group54805	species_special	Crassostrea_gigas_species_EVM0044231.1
group21883	species_special	Bathymodiolus_platifrons_species_2712:Bpl_scaf_10100-1.19-mRNA-1	Bathymodiolus_platifrons_species_15008:Bpl_scaf_34506-0.8-mRNA-1
group11059	single_ortholog	Bathymodiolus_platifrons_species_7794:Bpl_scaf_9391-6.14-mRNA-1	Crassostrea_gigas_species_EVM0002185.1	Crassostrea_virginica_species_rna-XM_022483693.1	Corbicula_fluminea_species_EVM0001626.1	Lottia_gigantea_species_rna-XM_009062198.1
group53908	species_special	Crassostrea_gigas_species_EVM0024275.1
group6871	other_ortholog	Crassostrea_gigas_species_EVM0045901.1	Crassostrea_gigas_species_EVM0048973.1	Crassostrea_virginica_species_rna-XM_022472095.1	Crassostrea_virginica_species_rna-XM_022467433.1	Crassostrea_virginica_species_rna-XM_022467432.1	Crassostrea_virginica_species_rna-XM_022467435.1	Crassostrea_virginica_species_rna-XM_022467434.1
group29925	species_special	Crassostrea_virginica_species_rna-XM_022461146.1	Crassostrea_virginica_species_rna-XM_022461148.1
group67488	species_special	Lottia_gigantea_species_rna-XM_009060008.1
group26049	species_special	Corbicula_fluminea_species_EVM0029832.1	Corbicula_fluminea_species_EVM0027551.1
group39436	species_special	Bathymodiolus_platifrons_species_15923:Bpl_scaf_58053-0.13-mRNA-1
group9361	species_special	Crassostrea_gigas_species_EVM0040850.1	Crassostrea_gigas_species_EVM0011529.1	Crassostrea_gigas_species_EVM0008259.1	Crassostrea_gigas_species_EVM0058343.1	Crassostrea_gigas_species_EVM0021605.1	Crassostrea_gigas_species_EVM0002911.1
group29593	other_ortholog	Crassostrea_gigas_species_EVM0011002.1	Crassostrea_virginica_species_rna-XM_022452236.1
group53234	species_special	Corbicula_fluminea_species_EVM0016275.1
group60364	species_special	Crassostrea_virginica_species_rna-XM_022435627.1
group35625	species_special	Bathymodiolus_platifrons_species_17843:Bpl_scaf_36595-7.56-mRNA-1
group69751	species_special	Lottia_gigantea_species_rna-XM_009065365.1
group57961	species_special	Crassostrea_gigas_species_EVM0006936.1
group4022	multi_ortholog	Bathymodiolus_platifrons_species_13699:Bpl_scaf_13745-1.8-mRNA-1	Crassostrea_virginica_species_rna-XM_022485394.1	Crassostrea_virginica_species_rna-XM_022485393.1	Lottia_gigantea_species_rna-XM_009060024.1	Crassostrea_gigas_species_EVM0039379.1	Corbicula_fluminea_species_EVM0023303.3	Crassostrea_gigas_species_EVM0039417.1	Crassostrea_virginica_species_rna-XM_022485395.1
group36019	species_special	Bathymodiolus_platifrons_species_2769:Bpl_scaf_39274-0.4-mRNA-1
group44966	species_special	Corbicula_fluminea_species_EVM0000265.1
group61390	species_special	Lottia_gigantea_species_rna-XM_009045753.1
group39109	species_special	Bathymodiolus_platifrons_species_8912:Bpl_scaf_56339-1.17-mRNA-1
group9888	other_ortholog	Crassostrea_gigas_species_EVM0032232.1	Crassostrea_gigas_species_EVM0016610.1	Crassostrea_virginica_species_rna-XM_022457208.1	Crassostrea_virginica_species_rna-XM_022463454.1	Crassostrea_virginica_species_rna-XM_022463453.1	Crassostrea_virginica_species_rna-XM_022463456.1
group24468	species_special	Corbicula_fluminea_species_EVM0010420.1	Corbicula_fluminea_species_EVM0013899.1
group27595	species_special	Crassostrea_gigas_species_EVM0032404.1	Crassostrea_gigas_species_EVM0029619.1
group15147	other_ortholog	Crassostrea_gigas_species_EVM0037625.1	Crassostrea_gigas_species_EVM0053941.1	Crassostrea_virginica_species_rna-XM_022482163.1	Crassostrea_virginica_species_rna-XM_022482162.1
group55629	species_special	Crassostrea_gigas_species_EVM0041818.1
group6166	other_ortholog	Bathymodiolus_platifrons_species_388:Bpl_scaf_57484-14.22-mRNA-1	Crassostrea_gigas_species_EVM0013677.2	Crassostrea_gigas_species_EVM0047217.2	Crassostrea_virginica_species_rna-XM_022483366.1	Crassostrea_virginica_species_rna-XM_022483369.1	Crassostrea_virginica_species_rna-XM_022483367.1	Corbicula_fluminea_species_EVM0019928.1
group41042	species_special	Bathymodiolus_platifrons_species_1041:Bpl_scaf_7524-5.12-mRNA-1
group5384	species_special	Bathymodiolus_platifrons_species_6080:Bpl_scaf_19377-0.0-mRNA-1	Bathymodiolus_platifrons_species_14404:Bpl_scaf_37981-0.6-mRNA-1	Bathymodiolus_platifrons_species_4663:Bpl_scaf_34579-0.2-mRNA-1	Bathymodiolus_platifrons_species_634:Bpl_scaf_45731-6.2-mRNA-1	Bathymodiolus_platifrons_species_15370:Bpl_scaf_63324-0.0-mRNA-1	Bathymodiolus_platifrons_species_11554:Bpl_scaf_4065-0.3-mRNA-1	Bathymodiolus_platifrons_species_6741:Bpl_scaf_27288-1.7-mRNA-1
group30857	species_special	Lottia_gigantea_species_rna-XM_009052981.1	Lottia_gigantea_species_rna-XM_009061144.1
group59021	species_special	Crassostrea_virginica_species_rna-XM_022460998.1
group14771	other_ortholog	Crassostrea_gigas_species_EVM0033241.1	Crassostrea_gigas_species_EVM0004228.1	Crassostrea_gigas_species_EVM0008801.1	Crassostrea_virginica_species_rna-XM_022434122.1
group59533	species_special	Crassostrea_virginica_species_rna-XM_022476225.1
group8435	multi_ortholog	Bathymodiolus_platifrons_species_6261:Bpl_scaf_5428-13.2-mRNA-1	Crassostrea_virginica_species_rna-XM_022470602.1	Crassostrea_gigas_species_EVM0057018.1	Crassostrea_gigas_species_EVM0008083.1	Corbicula_fluminea_species_EVM0026033.1	Lottia_gigantea_species_rna-XM_009046052.1
group55274	species_special	Crassostrea_gigas_species_EVM0032895.1
group45671	species_special	Corbicula_fluminea_species_EVM0005902.1
group42244	species_special	Corbicula_fluminea_species_EVM0010043.1
group40892	species_special	Bathymodiolus_platifrons_species_640:Bpl_scaf_680-0.12-mRNA-1
group45728	species_special	Corbicula_fluminea_species_EVM0020338.1
group16449	species_special	Bathymodiolus_platifrons_species_9007:Bpl_scaf_12857-0.6-mRNA-1	Bathymodiolus_platifrons_species_8175:Bpl_scaf_37314-0.7-mRNA-1	Bathymodiolus_platifrons_species_13977:Bpl_scaf_3643-13.5-mRNA-1
group47256	species_special	Corbicula_fluminea_species_EVM0017444.1
group69405	species_special	Lottia_gigantea_species_rna-XM_009064482.1
group20899	other_ortholog	Crassostrea_gigas_species_EVM0007272.1	Crassostrea_gigas_species_EVM0045375.1	Crassostrea_virginica_species_rna-XM_022458219.1
group17028	other_ortholog	Bathymodiolus_platifrons_species_2098:Bpl_scaf_40566-0.3-mRNA-1	Lottia_gigantea_species_rna-XM_009054912.1	Crassostrea_gigas_species_EVM0026135.1
group25022	species_special	Corbicula_fluminea_species_EVM0027587.1	Corbicula_fluminea_species_EVM0015328.1
group6662	species_special	Crassostrea_gigas_species_EVM0018492.1	Crassostrea_gigas_species_EVM0011161.1	Crassostrea_gigas_species_EVM0034589.1	Crassostrea_gigas_species_EVM0020435.1	Crassostrea_gigas_species_EVM0037495.1	Crassostrea_gigas_species_EVM0037350.1	Crassostrea_gigas_species_EVM0027832.1
group35553	species_special	Bathymodiolus_platifrons_species_3559:Bpl_scaf_36180-5.13-mRNA-1
group2297	multi_ortholog	Bathymodiolus_platifrons_species_15214:Bpl_scaf_19731-5.9-mRNA-1	Crassostrea_virginica_species_rna-XM_022432214.1	Crassostrea_virginica_species_rna-XM_022432216.1	Crassostrea_virginica_species_rna-XM_022432215.1	Crassostrea_virginica_species_rna-XM_022432217.1	Crassostrea_virginica_species_rna-XM_022432219.1	Crassostrea_gigas_species_EVM0014416.1	Crassostrea_gigas_species_EVM0047478.1	Corbicula_fluminea_species_EVM0006101.1	Crassostrea_virginica_species_rna-XM_022432218.1	Lottia_gigantea_species_rna-XM_009067651.1
group48557	species_special	Corbicula_fluminea_species_EVM0002448.1
group63115	species_special	Lottia_gigantea_species_rna-XM_009049682.1
group58628	species_special	Crassostrea_virginica_species_rna-XM_022473912.1
group5755	multi_ortholog	Bathymodiolus_platifrons_species_9809:Bpl_scaf_38288-11.24-mRNA-1	Corbicula_fluminea_species_EVM0003003.1	Crassostrea_virginica_species_rna-XM_022478417.1	Crassostrea_virginica_species_rna-XM_022478226.1	Lottia_gigantea_species_rna-XM_009048034.1	Crassostrea_gigas_species_EVM0008313.1	Crassostrea_gigas_species_EVM0008378.1
group5559	multi_ortholog	Bathymodiolus_platifrons_species_6536:Bpl_scaf_2847-4.19-mRNA-1	Corbicula_fluminea_species_EVM0023273.1	Crassostrea_virginica_species_rna-XM_022469891.1	Crassostrea_virginica_species_rna-XM_022470336.1	Lottia_gigantea_species_rna-XM_009057196.1	Crassostrea_gigas_species_EVM0024864.1	Crassostrea_gigas_species_EVM0024352.1
group56711	species_special	Crassostrea_gigas_species_EVM0002958.1
group35465	species_special	Bathymodiolus_platifrons_species_17657:Bpl_scaf_35683-0.1-mRNA-1
group12765	other_ortholog	Bathymodiolus_platifrons_species_10785:Bpl_scaf_12940-0.9-mRNA-1	Lottia_gigantea_species_rna-XM_009054439.1	Lottia_gigantea_species_rna-XM_009055538.1	Lottia_gigantea_species_rna-XM_009064968.1
group24815	species_special	Corbicula_fluminea_species_EVM0010040.1	Corbicula_fluminea_species_EVM0034618.1
group13244	species_special	Bathymodiolus_platifrons_species_3126:Bpl_scaf_38861-0.6-mRNA-1	Bathymodiolus_platifrons_species_5963:Bpl_scaf_54419-0.7-mRNA-1	Bathymodiolus_platifrons_species_6309:Bpl_scaf_563-1.59-mRNA-1	Bathymodiolus_platifrons_species_12645:Bpl_scaf_9704-4.16-mRNA-1
group34586	species_special	Bathymodiolus_platifrons_species_4763:Bpl_scaf_30291-0.20-mRNA-1
group45389	species_special	Corbicula_fluminea_species_EVM0034261.1
group66621	species_special	Lottia_gigantea_species_rna-XM_009057866.1
group62322	species_special	Lottia_gigantea_species_rna-XM_009047956.1
group36942	species_special	Bathymodiolus_platifrons_species_8986:Bpl_scaf_44748-0.5-mRNA-1
group10499	single_ortholog	Bathymodiolus_platifrons_species_3193:Bpl_scaf_31818-3.33-mRNA-1	Crassostrea_gigas_species_EVM0046615.1	Crassostrea_virginica_species_rna-XM_022438773.1	Corbicula_fluminea_species_EVM0034070.1	Lottia_gigantea_species_rna-XM_009061449.1
group67427	species_special	Lottia_gigantea_species_rna-XM_009059845.1
group63201	species_special	Lottia_gigantea_species_rna-XM_009049866.1
group8470	multi_ortholog	Bathymodiolus_platifrons_species_15460:Bpl_scaf_54882-1.7-mRNA-1	Crassostrea_virginica_species_rna-XM_022482330.1	Crassostrea_gigas_species_EVM0023455.1	Lottia_gigantea_species_rna-XM_009051876.1	Corbicula_fluminea_species_EVM0029563.1	Crassostrea_gigas_species_EVM0022865.1
group13014	species_special	Bathymodiolus_platifrons_species_17540:Bpl_scaf_23635-0.2-mRNA-1	Bathymodiolus_platifrons_species_9032:Bpl_scaf_27998-0.13-mRNA-1	Bathymodiolus_platifrons_species_9767:Bpl_scaf_56354-11.8-mRNA-1	Bathymodiolus_platifrons_species_9032:Bpl_scaf_27998-0.12-mRNA-1
group31061	species_special	Lottia_gigantea_species_rna-XM_009060904.1	Lottia_gigantea_species_rna-XM_009060905.1
group23218	species_special	Bathymodiolus_platifrons_species_5427:Bpl_scaf_45214-4.1-mRNA-1	Bathymodiolus_platifrons_species_18469:Bpl_scaf_52366-0.2-mRNA-1
group43186	species_special	Corbicula_fluminea_species_EVM0005987.1
group36480	species_special	Bathymodiolus_platifrons_species_12950:Bpl_scaf_41791-0.10-mRNA-1
group9191	other_ortholog	Corbicula_fluminea_species_EVM0002095.1	Lottia_gigantea_species_rna-XM_009055279.1	Corbicula_fluminea_species_EVM0029516.1	Corbicula_fluminea_species_EVM0022914.1	Corbicula_fluminea_species_EVM0003624.1	Lottia_gigantea_species_rna-XM_009059562.1
group33862	species_special	Bathymodiolus_platifrons_species_680:Bpl_scaf_26054-0.1-mRNA-1
group11468	species_special	Corbicula_fluminea_species_EVM0034018.1	Corbicula_fluminea_species_EVM0034438.1	Corbicula_fluminea_species_EVM0003994.1	Corbicula_fluminea_species_EVM0000360.1	Corbicula_fluminea_species_EVM0017189.1
group25980	other_ortholog	Corbicula_fluminea_species_EVM0013160.1	Lottia_gigantea_species_rna-XM_009051627.1
group18452	other_ortholog	Crassostrea_gigas_species_EVM0011085.1	Crassostrea_gigas_species_EVM0040741.1	Crassostrea_virginica_species_rna-XM_022454984.1
group30454	species_special	Crassostrea_virginica_species_rna-XM_022444149.1	Crassostrea_virginica_species_rna-XM_022444150.1
group28123	species_special	Crassostrea_gigas_species_EVM0031625.1	Crassostrea_gigas_species_EVM0009605.1
group39140	species_special	Bathymodiolus_platifrons_species_9767:Bpl_scaf_56354-11.6-mRNA-1
group65124	species_special	Lottia_gigantea_species_rna-XM_009054288.1
group25279	species_special	Corbicula_fluminea_species_EVM0031101.1	Corbicula_fluminea_species_EVM0013130.1
group5172	species_special	Bathymodiolus_platifrons_species_17761:Bpl_scaf_53995-0.10-mRNA-1	Bathymodiolus_platifrons_species_2253:Bpl_scaf_51325-0.31-mRNA-1	Bathymodiolus_platifrons_species_3347:Bpl_scaf_1324-0.1-mRNA-1	Bathymodiolus_platifrons_species_16441:Bpl_scaf_65377-0.20-mRNA-1	Bathymodiolus_platifrons_species_9304:Bpl_scaf_51660-0.2-mRNA-1	Bathymodiolus_platifrons_species_9799:Bpl_scaf_48626-0.22-mRNA-1	Bathymodiolus_platifrons_species_11320:Bpl_scaf_16281-0.29-mRNA-1
group50767	species_special	Corbicula_fluminea_species_EVM0027428.1
group5127	species_special	Lottia_gigantea_species_rna-XM_009049068.1	Lottia_gigantea_species_rna-XM_009049070.1	Lottia_gigantea_species_rna-XM_009049072.1	Lottia_gigantea_species_rna-XM_009057389.1	Lottia_gigantea_species_rna-XM_009064911.1	Lottia_gigantea_species_rna-XM_009050835.1	Lottia_gigantea_species_rna-XM_009050837.1	Lottia_gigantea_species_rna-XM_009051806.1
group54034	species_special	Crassostrea_gigas_species_EVM0052117.1
group13343	other_ortholog	Bathymodiolus_platifrons_species_15931:Bpl_scaf_48941-0.14-mRNA-1	Crassostrea_virginica_species_rna-XM_022433323.1	Crassostrea_gigas_species_EVM0036158.1	Crassostrea_gigas_species_EVM0037128.1
group58207	species_special	Crassostrea_gigas_species_EVM0009606.1
group57023	species_special	Crassostrea_gigas_species_EVM0043211.1
group3506	multi_ortholog	Bathymodiolus_platifrons_species_17530:Bpl_scaf_53117-2.13-mRNA-1	Corbicula_fluminea_species_EVM0023247.1	Lottia_gigantea_species_rna-XM_009065197.1	Crassostrea_virginica_species_rna-XM_022471490.1	Crassostrea_virginica_species_rna-XM_022471491.1	Crassostrea_virginica_species_rna-XM_022471492.1	Crassostrea_virginica_species_rna-XM_022471493.1	Crassostrea_gigas_species_EVM0058020.1	Crassostrea_gigas_species_EVM0000946.1
group49560	species_special	Corbicula_fluminea_species_EVM0007004.1
group66567	species_special	Lottia_gigantea_species_rna-XM_009057741.1
group7332	other_ortholog	Bathymodiolus_platifrons_species_11634:Bpl_scaf_16370-0.29-mRNA-1	Crassostrea_virginica_species_rna-XM_022476524.1	Crassostrea_gigas_species_EVM0000640.1	Crassostrea_gigas_species_EVM0045982.1	Crassostrea_gigas_species_EVM0013844.1	Crassostrea_gigas_species_EVM0026647.1
group51476	species_special	Corbicula_fluminea_species_EVM0025894.1
group38927	species_special	Bathymodiolus_platifrons_species_14902:Bpl_scaf_5555-2.15-mRNA-1
group52378	species_special	Corbicula_fluminea_species_EVM0023984.1
group42564	species_special	Corbicula_fluminea_species_EVM0021477.1
group67949	species_special	Lottia_gigantea_species_rna-XM_009061129.1
group63203	species_special	Lottia_gigantea_species_rna-XM_009049869.1
group47030	species_special	Corbicula_fluminea_species_EVM0001459.1
group26731	species_special	Crassostrea_gigas_species_EVM0056154.1	Crassostrea_gigas_species_EVM0046250.1
group33637	species_special	Bathymodiolus_platifrons_species_6424:Bpl_scaf_24834-0.3-mRNA-1
group65029	species_special	Lottia_gigantea_species_rna-XM_009054095.1
group53322	species_special	Corbicula_fluminea_species_EVM0036391.1
group48932	species_special	Corbicula_fluminea_species_EVM0000110.1
group39721	species_special	Bathymodiolus_platifrons_species_2654:Bpl_scaf_59648-11.6-mRNA-1
group11376	other_ortholog	Corbicula_fluminea_species_EVM0037487.1	Crassostrea_virginica_species_rna-XM_022484884.1	Crassostrea_gigas_species_EVM0030599.1	Lottia_gigantea_species_rna-XM_009046964.1	Crassostrea_gigas_species_EVM0003002.1
group4558	multi_ortholog	Bathymodiolus_platifrons_species_6059:Bpl_scaf_58266-5.3-mRNA-1	Crassostrea_virginica_species_rna-XM_022474322.1	Crassostrea_gigas_species_EVM0001998.1	Crassostrea_virginica_species_rna-XM_022474320.1	Crassostrea_virginica_species_rna-XM_022474323.1	Corbicula_fluminea_species_EVM0009838.1	Crassostrea_gigas_species_EVM0056090.1	Lottia_gigantea_species_rna-XM_009063380.1
group64495	species_special	Lottia_gigantea_species_rna-XM_009052873.1
group34040	species_special	Bathymodiolus_platifrons_species_3371:Bpl_scaf_27297-1.4-mRNA-1
group67862	species_special	Lottia_gigantea_species_rna-XM_009060924.1
group45168	species_special	Corbicula_fluminea_species_EVM0007371.1
group48148	species_special	Corbicula_fluminea_species_EVM0000713.1
group59232	species_special	Crassostrea_virginica_species_rna-XM_022467092.1
group60907	species_special	Crassostrea_virginica_species_rna-XM_022452261.1
group67792	species_special	Lottia_gigantea_species_rna-XM_009060747.1
group41462	species_special	Corbicula_fluminea_species_EVM0005205.1
group54534	species_special	Crassostrea_gigas_species_EVM0026003.1
group26879	species_special	Crassostrea_gigas_species_EVM0001595.1	Crassostrea_gigas_species_EVM0000393.1
group46852	species_special	Corbicula_fluminea_species_EVM0019837.1
group54042	species_special	Crassostrea_gigas_species_EVM0006367.2
group27768	species_special	Crassostrea_gigas_species_EVM0056460.1	Crassostrea_gigas_species_EVM0055871.1
group7293	multi_ortholog	Bathymodiolus_platifrons_species_10363:Bpl_scaf_15294-7.7-mRNA-1	Crassostrea_gigas_species_EVM0035255.1	Crassostrea_virginica_species_rna-XM_022475911.1	Crassostrea_gigas_species_EVM0035700.1	Lottia_gigantea_species_rna-XM_009067516.1	Corbicula_fluminea_species_EVM0027682.2
group22779	species_special	Bathymodiolus_platifrons_species_2531:Bpl_scaf_30925-0.13-mRNA-1	Bathymodiolus_platifrons_species_2531:Bpl_scaf_30925-0.8-mRNA-1
group46543	species_special	Corbicula_fluminea_species_EVM0019494.3
group15752	species_special	Crassostrea_gigas_species_EVM0030018.1	Crassostrea_gigas_species_EVM0012345.1	Crassostrea_gigas_species_EVM0043199.1	Crassostrea_gigas_species_EVM0051580.1
group1836	species_special	Crassostrea_gigas_species_EVM0005853.1	Crassostrea_gigas_species_EVM0014479.1	Crassostrea_gigas_species_EVM0048161.1	Crassostrea_gigas_species_EVM0035940.2	Crassostrea_gigas_species_EVM0018765.1	Crassostrea_gigas_species_EVM0035275.1	Crassostrea_gigas_species_EVM0040194.1	Crassostrea_gigas_species_EVM0026120.1	Crassostrea_gigas_species_EVM0019156.1	Crassostrea_gigas_species_EVM0040818.1	Crassostrea_gigas_species_EVM0019457.1	Crassostrea_gigas_species_EVM0005383.1	Crassostrea_gigas_species_EVM0014665.1
group49241	species_special	Corbicula_fluminea_species_EVM0023422.1
group16033	species_special	Crassostrea_virginica_species_rna-XM_022477087.1	Crassostrea_virginica_species_rna-XM_022467293.1	Crassostrea_virginica_species_rna-XM_022467285.1	Crassostrea_virginica_species_rna-XM_022449014.1
group59590	species_special	Crassostrea_virginica_species_rna-XM_022488602.1
group45756	species_special	Corbicula_fluminea_species_EVM0018460.1
group14419	species_special	Crassostrea_gigas_species_EVM0053358.1	Crassostrea_gigas_species_EVM0012854.1	Crassostrea_gigas_species_EVM0030954.1	Crassostrea_gigas_species_EVM0004942.1
group51850	species_special	Corbicula_fluminea_species_EVM0023363.1
group15136	other_ortholog	Crassostrea_gigas_species_EVM0043826.1	Crassostrea_gigas_species_EVM0027796.1	Crassostrea_virginica_species_rna-XM_022482881.1	Crassostrea_virginica_species_rna-XM_022489004.1
group44962	species_special	Corbicula_fluminea_species_EVM0030869.1
group19593	species_special	Crassostrea_gigas_species_EVM0055007.1	Crassostrea_gigas_species_EVM0006157.1	Crassostrea_gigas_species_EVM0018347.1
group47667	species_special	Corbicula_fluminea_species_EVM0025962.1
group54115	species_special	Crassostrea_gigas_species_EVM0024308.1
group56527	species_special	Crassostrea_gigas_species_EVM0032706.1
group31763	species_special	Bathymodiolus_platifrons_species_9757:Bpl_scaf_1372-8.4-mRNA-1
group25868	species_special	Corbicula_fluminea_species_EVM0016183.1	Corbicula_fluminea_species_EVM0017928.1
group30425	species_special	Crassostrea_virginica_species_rna-XM_022443592.1	Crassostrea_virginica_species_rna-XM_022443593.1
group22001	species_special	Bathymodiolus_platifrons_species_2655:Bpl_scaf_12878-0.4-mRNA-1	Bathymodiolus_platifrons_species_2458:Bpl_scaf_16927-0.10-mRNA-1
group70824	species_special	Lottia_gigantea_species_rna-XM_009067952.1
group19466	other_ortholog	Crassostrea_gigas_species_EVM0043716.1	Crassostrea_virginica_species_rna-XM_022438568.1	Crassostrea_virginica_species_rna-XM_022438600.1
group54906	species_special	Crassostrea_gigas_species_EVM0013150.1
group30988	species_special	Lottia_gigantea_species_rna-XM_009057374.1	Lottia_gigantea_species_rna-XM_009057375.1
group66669	species_special	Lottia_gigantea_species_rna-XM_009057991.1
group56475	species_special	Crassostrea_gigas_species_EVM0048285.1
group55784	species_special	Crassostrea_gigas_species_EVM0054869.1
group48128	species_special	Corbicula_fluminea_species_EVM0004129.1
group207	other_ortholog	Bathymodiolus_platifrons_species_1776:Bpl_scaf_49256-2.7-mRNA-1	Crassostrea_gigas_species_EVM0007959.1	Crassostrea_gigas_species_EVM0026718.1	Crassostrea_gigas_species_EVM0050039.1	Crassostrea_gigas_species_EVM0018395.1	Crassostrea_gigas_species_EVM0030654.1	Crassostrea_gigas_species_EVM0037223.1	Crassostrea_gigas_species_EVM0037137.1	Crassostrea_gigas_species_EVM0052778.1	Crassostrea_gigas_species_EVM0011550.1	Crassostrea_gigas_species_EVM0008749.1	Crassostrea_gigas_species_EVM0019756.1	Crassostrea_gigas_species_EVM0054403.1	Crassostrea_gigas_species_EVM0048148.1	Crassostrea_gigas_species_EVM0041324.1	Crassostrea_gigas_species_EVM0002055.1	Crassostrea_gigas_species_EVM0036092.1	Crassostrea_gigas_species_EVM0003685.1	Lottia_gigantea_species_rna-XM_009061369.1	Crassostrea_gigas_species_EVM0011409.1	Crassostrea_virginica_species_rna-XM_022463226.1	Crassostrea_virginica_species_rna-XM_022463225.1	Crassostrea_virginica_species_rna-XM_022474928.1	Crassostrea_virginica_species_rna-XM_022435614.1	Lottia_gigantea_species_rna-XM_009053877.1	Lottia_gigantea_species_rna-XM_009055169.1	Lottia_gigantea_species_rna-XM_009056396.1	Lottia_gigantea_species_rna-XM_009058128.1	Lottia_gigantea_species_rna-XM_009060846.1	Lottia_gigantea_species_rna-XM_009061051.1	Lottia_gigantea_species_rna-XM_009063121.1	Lottia_gigantea_species_rna-XM_009067482.1	Lottia_gigantea_species_rna-XM_009069022.1
group24777	species_special	Corbicula_fluminea_species_EVM0018220.1	Corbicula_fluminea_species_EVM0016090.1
group68508	species_special	Lottia_gigantea_species_rna-XM_009062393.1
group8199	multi_ortholog	Bathymodiolus_platifrons_species_10313:Bpl_scaf_45934-2.10-mRNA-1	Corbicula_fluminea_species_EVM0000024.1	Crassostrea_gigas_species_EVM0022060.1	Crassostrea_virginica_species_rna-XM_022470851.1	Lottia_gigantea_species_rna-XM_009058269.1	Crassostrea_gigas_species_EVM0007091.1
group9545	other_ortholog	Crassostrea_gigas_species_EVM0031931.1	Crassostrea_virginica_species_rna-XM_022436043.1	Crassostrea_virginica_species_rna-XM_022436042.1	Crassostrea_virginica_species_rna-XM_022436177.1	Crassostrea_virginica_species_rna-XM_022436176.1	Crassostrea_virginica_species_rna-XM_022436044.1
group11782	other_ortholog	Crassostrea_gigas_species_EVM0046071.1	Crassostrea_virginica_species_rna-XM_022448878.1	Crassostrea_virginica_species_rna-XM_022448870.1	Crassostrea_virginica_species_rna-XM_022448872.1	Crassostrea_virginica_species_rna-XM_022448868.1
group27463	species_special	Crassostrea_gigas_species_EVM0019162.1	Crassostrea_gigas_species_EVM0009826.1
group3007	other_ortholog	Corbicula_fluminea_species_EVM0000134.1	Crassostrea_gigas_species_EVM0032250.1	Crassostrea_gigas_species_EVM0003796.1	Crassostrea_virginica_species_rna-XM_022447658.1	Crassostrea_virginica_species_rna-XM_022447659.1	Crassostrea_virginica_species_rna-XM_022447657.1	Crassostrea_virginica_species_rna-XM_022447656.1	Crassostrea_virginica_species_rna-XM_022447660.1	Lottia_gigantea_species_rna-XM_009058075.1	Crassostrea_gigas_species_EVM0027546.1
group21113	other_ortholog	Crassostrea_gigas_species_EVM0042049.1	Crassostrea_gigas_species_EVM0056062.1	Crassostrea_virginica_species_rna-XM_022463523.1
group22219	species_special	Bathymodiolus_platifrons_species_7545:Bpl_scaf_17125-1.13-mRNA-1	Bathymodiolus_platifrons_species_12404:Bpl_scaf_29418-0.10-mRNA-1
group69190	species_special	Lottia_gigantea_species_rna-XM_009063955.1
group14174	other_ortholog	Crassostrea_gigas_species_EVM0026817.1	Crassostrea_gigas_species_EVM0014456.1	Crassostrea_virginica_species_rna-XM_022454487.1	Crassostrea_virginica_species_rna-XM_022454493.1
group64347	species_special	Lottia_gigantea_species_rna-XM_009052558.1
group15426	other_ortholog	Crassostrea_gigas_species_EVM0017878.1	Crassostrea_gigas_species_EVM0050472.1	Crassostrea_virginica_species_rna-XM_022471271.1	Crassostrea_virginica_species_rna-XM_022462346.1
group12159	other_ortholog	Crassostrea_gigas_species_EVM0044133.1	Crassostrea_gigas_species_EVM0008386.1	Crassostrea_virginica_species_rna-XM_022464849.1	Crassostrea_virginica_species_rna-XM_022464443.1	Crassostrea_virginica_species_rna-XM_022464444.1
group3134	other_ortholog	Crassostrea_gigas_species_EVM0026829.1	Crassostrea_gigas_species_EVM0019166.1	Crassostrea_virginica_species_rna-XM_022465720.1	Crassostrea_virginica_species_rna-XM_022464402.1	Crassostrea_virginica_species_rna-XM_022465722.1	Crassostrea_virginica_species_rna-XM_022465719.1	Crassostrea_virginica_species_rna-XM_022464401.1	Crassostrea_virginica_species_rna-XM_022465721.1	Crassostrea_virginica_species_rna-XM_022464400.1	Crassostrea_virginica_species_rna-XM_022464398.1
group67301	species_special	Lottia_gigantea_species_rna-XM_009059578.1
group19743	other_ortholog	Crassostrea_gigas_species_EVM0027984.1	Crassostrea_gigas_species_EVM0014314.1	Crassostrea_virginica_species_rna-XM_022490256.1
group12755	species_special	Bathymodiolus_platifrons_species_16658:Bpl_scaf_12470-0.3-mRNA-1	Bathymodiolus_platifrons_species_15314:Bpl_scaf_49174-0.17-mRNA-1	Bathymodiolus_platifrons_species_5820:Bpl_scaf_19142-0.4-mRNA-1	Bathymodiolus_platifrons_species_8956:Bpl_scaf_60227-0.2-mRNA-1
group32757	species_special	Bathymodiolus_platifrons_species_10312:Bpl_scaf_19372-3.14-mRNA-1
group39248	species_special	Bathymodiolus_platifrons_species_18461:Bpl_scaf_57006-1.28-mRNA-1
group25476	species_special	Corbicula_fluminea_species_EVM0010173.1	Corbicula_fluminea_species_EVM0021586.1
group59044	species_special	Crassostrea_virginica_species_rna-XM_022463635.1
group39659	species_special	Bathymodiolus_platifrons_species_17166:Bpl_scaf_59459-1.25-mRNA-1
group30639	species_special	Lottia_gigantea_species_rna-XM_009045399.1	Lottia_gigantea_species_rna-XM_009054758.1
group10080	other_ortholog	Bathymodiolus_platifrons_species_9563:Bpl_scaf_12088-0.10-mRNA-1	Bathymodiolus_platifrons_species_219:Bpl_scaf_43289-0.5-mRNA-1	Crassostrea_gigas_species_EVM0054500.1	Crassostrea_gigas_species_EVM0042445.1	Crassostrea_gigas_species_EVM0006249.1
group26415	species_special	Crassostrea_gigas_species_EVM0034462.1	Crassostrea_gigas_species_EVM0028842.1
group37033	species_special	Bathymodiolus_platifrons_species_15647:Bpl_scaf_45239-2.18-mRNA-1
group13785	species_special	Corbicula_fluminea_species_EVM0004561.1	Corbicula_fluminea_species_EVM0015763.1	Corbicula_fluminea_species_EVM0003084.1	Corbicula_fluminea_species_EVM0012873.1
group10073	species_special	Bathymodiolus_platifrons_species_6528:Bpl_scaf_11663-3.4-mRNA-1	Bathymodiolus_platifrons_species_17827:Bpl_scaf_34531-1.27-mRNA-1	Bathymodiolus_platifrons_species_13694:Bpl_scaf_21361-1.12-mRNA-1	Bathymodiolus_platifrons_species_12517:Bpl_scaf_6522-4.10-mRNA-1	Bathymodiolus_platifrons_species_17530:Bpl_scaf_53117-3.9-mRNA-1
group68917	species_special	Lottia_gigantea_species_rna-XM_009063342.1
group28072	species_special	Crassostrea_gigas_species_EVM0042816.1	Crassostrea_gigas_species_EVM0056898.1
group50109	species_special	Corbicula_fluminea_species_EVM0001389.1
group6525	species_special	Corbicula_fluminea_species_EVM0023620.1	Corbicula_fluminea_species_EVM0024927.1	Corbicula_fluminea_species_EVM0030917.1	Corbicula_fluminea_species_EVM0020188.1	Corbicula_fluminea_species_EVM0016121.1	Corbicula_fluminea_species_EVM0027324.1	Corbicula_fluminea_species_EVM0038240.1
group34666	species_special	Bathymodiolus_platifrons_species_7109:Bpl_scaf_30775-0.5-mRNA-1
group21774	species_special	Lottia_gigantea_species_rna-XM_009051392.1	Lottia_gigantea_species_rna-XM_009051393.1	Lottia_gigantea_species_rna-XM_009069138.1
group69833	species_special	Lottia_gigantea_species_rna-XM_009065584.1
group57569	species_special	Crassostrea_gigas_species_EVM0002256.1
group9625	other_ortholog	Crassostrea_gigas_species_EVM0001291.1	Crassostrea_gigas_species_EVM0008678.1	Crassostrea_virginica_species_rna-XM_022479665.1	Crassostrea_virginica_species_rna-XM_022479664.1	Crassostrea_virginica_species_rna-XM_022479756.1	Crassostrea_virginica_species_rna-XM_022479755.1
group4023	species_special	Bathymodiolus_platifrons_species_10310:Bpl_scaf_13988-1.3-mRNA-1	Bathymodiolus_platifrons_species_8494:Bpl_scaf_24466-10.0-mRNA-1	Bathymodiolus_platifrons_species_16072:Bpl_scaf_43983-3.4-mRNA-1	Bathymodiolus_platifrons_species_9877:Bpl_scaf_36964-6.0-mRNA-1	Bathymodiolus_platifrons_species_10441:Bpl_scaf_23677-9.2-mRNA-1	Bathymodiolus_platifrons_species_18307:Bpl_scaf_20952-9.1-mRNA-1	Bathymodiolus_platifrons_species_14405:Bpl_scaf_35486-0.13-mRNA-1	Bathymodiolus_platifrons_species_1184:Bpl_scaf_36259-0.0-mRNA-1
group24207	species_special	Corbicula_fluminea_species_EVM0031737.1	Corbicula_fluminea_species_EVM0035341.1
group33612	species_special	Bathymodiolus_platifrons_species_13954:Bpl_scaf_24657-0.11-mRNA-1
group51705	species_special	Corbicula_fluminea_species_EVM0018096.1
group13541	species_special	Corbicula_fluminea_species_EVM0007402.1	Corbicula_fluminea_species_EVM0023584.1	Corbicula_fluminea_species_EVM0017337.1	Corbicula_fluminea_species_EVM0014798.1
group20500	other_ortholog	Crassostrea_virginica_species_rna-XM_022467151.1	Crassostrea_gigas_species_EVM0042461.1	Crassostrea_gigas_species_EVM0026954.1
group66703	species_special	Lottia_gigantea_species_rna-XM_009058078.1
group19392	other_ortholog	Crassostrea_gigas_species_EVM0009042.1	Crassostrea_gigas_species_EVM0021488.1	Crassostrea_virginica_species_rna-XM_022483151.1
group10102	other_ortholog	Bathymodiolus_platifrons_species_14291:Bpl_scaf_12887-0.15-mRNA-1	Crassostrea_gigas_species_EVM0056950.1	Corbicula_fluminea_species_EVM0036059.1	Crassostrea_gigas_species_EVM0016888.1	Crassostrea_virginica_species_rna-XM_022490160.1
group46874	species_special	Corbicula_fluminea_species_EVM0022061.1
group16002	other_ortholog	Crassostrea_gigas_species_EVM0006223.1	Crassostrea_gigas_species_EVM0017363.1	Crassostrea_virginica_species_rna-XM_022433768.1	Crassostrea_virginica_species_rna-XM_022433985.1
group43357	species_special	Corbicula_fluminea_species_EVM0006252.1
group32661	species_special	Bathymodiolus_platifrons_species_10118:Bpl_scaf_18878-0.3-mRNA-1
group66985	species_special	Lottia_gigantea_species_rna-XM_009058764.1
group36227	species_special	Bathymodiolus_platifrons_species_14148:Bpl_scaf_40880-0.15-mRNA-1
group34866	species_special	Bathymodiolus_platifrons_species_3193:Bpl_scaf_31818-3.34-mRNA-1
group37806	species_special	Bathymodiolus_platifrons_species_924:Bpl_scaf_49759-11.7-mRNA-1
group28814	species_special	Crassostrea_gigas_species_EVM0058591.1	Crassostrea_gigas_species_EVM0039683.1
group16007	other_ortholog	Crassostrea_gigas_species_EVM0030576.1	Crassostrea_gigas_species_EVM0045362.1	Crassostrea_virginica_species_rna-XM_022464235.1	Crassostrea_virginica_species_rna-XM_022463555.1
group6971	other_ortholog	Crassostrea_gigas_species_EVM0012662.1	Crassostrea_gigas_species_EVM0011607.1	Crassostrea_gigas_species_EVM0017478.1	Crassostrea_virginica_species_rna-XM_022457836.1	Crassostrea_virginica_species_rna-XM_022458529.1	Crassostrea_gigas_species_EVM0021629.1	Crassostrea_gigas_species_EVM0011294.1
group31138	species_special	Lottia_gigantea_species_rna-XM_009066397.1	Lottia_gigantea_species_rna-XM_009066398.1
group58299	species_special	Crassostrea_gigas_species_EVM0006965.1
group31767	species_special	Bathymodiolus_platifrons_species_9757:Bpl_scaf_1372-11.14-mRNA-1
group58400	species_special	Crassostrea_gigas_species_EVM0045779.1
group8657	multi_ortholog	Bathymodiolus_platifrons_species_4424:Bpl_scaf_61121-0.27-mRNA-1	Crassostrea_virginica_species_rna-XM_022451657.1	Corbicula_fluminea_species_EVM0010094.1	Crassostrea_gigas_species_EVM0013087.1	Crassostrea_gigas_species_EVM0024940.1	Lottia_gigantea_species_rna-XM_009046754.1
group2135	other_ortholog	Crassostrea_gigas_species_EVM0033883.2	Crassostrea_virginica_species_rna-XM_022486761.1	Crassostrea_virginica_species_rna-XM_022486752.1	Crassostrea_virginica_species_rna-XM_022486726.1	Crassostrea_virginica_species_rna-XM_022486734.1	Crassostrea_virginica_species_rna-XM_022486743.1	Crassostrea_virginica_species_rna-XM_022486715.1	Crassostrea_virginica_species_rna-XM_022486769.1	Crassostrea_virginica_species_rna-XM_022486775.1	Crassostrea_gigas_species_EVM0000508.1	Crassostrea_virginica_species_rna-XM_022486782.1	Crassostrea_virginica_species_rna-XM_022486791.1
group45095	species_special	Corbicula_fluminea_species_EVM0007597.1
group47663	species_special	Corbicula_fluminea_species_EVM0031166.1
group1866	species_special	Bathymodiolus_platifrons_species_5362:Bpl_scaf_10280-0.3-mRNA-1	Bathymodiolus_platifrons_species_14597:Bpl_scaf_62577-2.13-mRNA-1	Bathymodiolus_platifrons_species_13768:Bpl_scaf_26746-1.5-mRNA-1	Bathymodiolus_platifrons_species_2486:Bpl_scaf_35780-0.1-mRNA-1	Bathymodiolus_platifrons_species_5427:Bpl_scaf_45214-3.12-mRNA-1	Bathymodiolus_platifrons_species_11482:Bpl_scaf_7661-0.4-mRNA-1	Bathymodiolus_platifrons_species_4955:Bpl_scaf_17877-2.9-mRNA-1	Bathymodiolus_platifrons_species_1774:Bpl_scaf_1314-0.19-mRNA-1	Bathymodiolus_platifrons_species_16346:Bpl_scaf_26250-0.3-mRNA-1	Bathymodiolus_platifrons_species_18596:Bpl_scaf_22037-0.15-mRNA-1	Bathymodiolus_platifrons_species_15329:Bpl_scaf_46578-6.22-mRNA-1	Bathymodiolus_platifrons_species_8686:Bpl_scaf_56822-1.1-mRNA-1
group65145	species_special	Lottia_gigantea_species_rna-XM_009054338.1
group32849	species_special	Bathymodiolus_platifrons_species_11565:Bpl_scaf_19895-1.21-mRNA-1
group31704	species_special	Bathymodiolus_platifrons_species_928:Bpl_scaf_13259-0.0-mRNA-1
group68284	species_special	Lottia_gigantea_species_rna-XM_009061919.1
group69364	species_special	Lottia_gigantea_species_rna-XM_009064380.1
group35805	species_special	Bathymodiolus_platifrons_species_7745:Bpl_scaf_38078-4.11-mRNA-1
group16177	species_special	Crassostrea_virginica_species_rna-XM_022434862.1	Crassostrea_virginica_species_rna-XM_022452365.1	Crassostrea_virginica_species_rna-XM_022452366.1	Crassostrea_virginica_species_rna-XM_022452364.1
group69001	species_special	Lottia_gigantea_species_rna-XM_009063512.1
group58883	species_special	Crassostrea_virginica_species_rna-XM_022463443.1
group59409	species_special	Crassostrea_virginica_species_rna-XM_022474427.1
group17495	species_special	Corbicula_fluminea_species_EVM0032136.1	Corbicula_fluminea_species_EVM0024802.1	Corbicula_fluminea_species_EVM0004004.1
group9850	other_ortholog	Crassostrea_gigas_species_EVM0056083.1	Crassostrea_gigas_species_EVM0046511.1	Crassostrea_virginica_species_rna-XM_022462753.1	Crassostrea_virginica_species_rna-XM_022458683.1	Crassostrea_virginica_species_rna-XM_022458684.1	Crassostrea_virginica_species_rna-XM_022462752.1
group20071	species_special	Crassostrea_gigas_species_EVM0030569.1	Crassostrea_gigas_species_EVM0013042.1	Crassostrea_gigas_species_EVM0040915.1
group17097	other_ortholog	Bathymodiolus_platifrons_species_7175:Bpl_scaf_45183-4.10-mRNA-1	Corbicula_fluminea_species_EVM0013869.1	Lottia_gigantea_species_rna-XM_009056434.1
group19844	other_ortholog	Crassostrea_gigas_species_EVM0047351.1	Crassostrea_virginica_species_rna-XM_022479875.1	Crassostrea_virginica_species_rna-XM_022479876.1
group43304	species_special	Corbicula_fluminea_species_EVM0004200.1
group11648	other_ortholog	Crassostrea_gigas_species_EVM0003629.1	Crassostrea_virginica_species_rna-XM_022449545.1	Crassostrea_gigas_species_EVM0001294.1	Crassostrea_virginica_species_rna-XM_022439098.1	Crassostrea_virginica_species_rna-XM_022452842.1
group64757	species_special	Lottia_gigantea_species_rna-XM_009053499.1
group37144	species_special	Bathymodiolus_platifrons_species_9821:Bpl_scaf_46053-2.26-mRNA-1
group11041	other_ortholog	Bathymodiolus_platifrons_species_389:Bpl_scaf_7632-1.8-mRNA-1	Crassostrea_virginica_species_rna-XM_022479490.1	Crassostrea_gigas_species_EVM0008623.1	Crassostrea_gigas_species_EVM0043332.1	Crassostrea_virginica_species_rna-XM_022479498.1
group50903	species_special	Corbicula_fluminea_species_EVM0033812.1
group14819	other_ortholog	Crassostrea_gigas_species_EVM0037288.1	Crassostrea_gigas_species_EVM0006338.1	Crassostrea_virginica_species_rna-XM_022482300.1	Crassostrea_virginica_species_rna-XM_022482299.1
group5229	species_special	Bathymodiolus_platifrons_species_13753:Bpl_scaf_13697-0.45-mRNA-1	Bathymodiolus_platifrons_species_2292:Bpl_scaf_48232-10.8-mRNA-1	Bathymodiolus_platifrons_species_8754:Bpl_scaf_5334-4.30-mRNA-1	Bathymodiolus_platifrons_species_9615:Bpl_scaf_7824-0.5-mRNA-1	Bathymodiolus_platifrons_species_10931:Bpl_scaf_22360-0.7-mRNA-1	Bathymodiolus_platifrons_species_13978:Bpl_scaf_61538-0.6-mRNA-1	Bathymodiolus_platifrons_species_5830:Bpl_scaf_46551-3.0-mRNA-1
group17640	species_special	Corbicula_fluminea_species_EVM0014270.1	Corbicula_fluminea_species_EVM0007973.1	Corbicula_fluminea_species_EVM0002039.1
group45007	species_special	Corbicula_fluminea_species_EVM0008203.1
group24225	species_special	Corbicula_fluminea_species_EVM0034519.1	Corbicula_fluminea_species_EVM0019573.1
group47468	species_special	Corbicula_fluminea_species_EVM0003304.1
group4522	other_ortholog	Bathymodiolus_platifrons_species_10812:Bpl_scaf_5538-4.10-mRNA-1	Crassostrea_virginica_species_rna-XM_022477072.1	Crassostrea_virginica_species_rna-XM_022477067.1	Crassostrea_virginica_species_rna-XM_022477069.1	Crassostrea_virginica_species_rna-XM_022477071.1	Lottia_gigantea_species_rna-XM_009058555.1	Crassostrea_virginica_species_rna-XM_022477065.1	Crassostrea_virginica_species_rna-XM_022477064.1
group37876	species_special	Bathymodiolus_platifrons_species_4360:Bpl_scaf_50061-0.1-mRNA-1
group3713	species_special	Crassostrea_gigas_species_EVM0002246.1	Crassostrea_gigas_species_EVM0051726.1	Crassostrea_gigas_species_EVM0046580.1	Crassostrea_gigas_species_EVM0018922.1	Crassostrea_gigas_species_EVM0012833.1	Crassostrea_gigas_species_EVM0038243.1	Crassostrea_gigas_species_EVM0029078.1	Crassostrea_gigas_species_EVM0045865.1	Crassostrea_gigas_species_EVM0002552.1
group15523	other_ortholog	Crassostrea_gigas_species_EVM0047489.1	Crassostrea_virginica_species_rna-XM_022444034.1	Crassostrea_virginica_species_rna-XM_022444035.1	Crassostrea_gigas_species_EVM0042239.1
group29662	other_ortholog	Crassostrea_gigas_species_EVM0049712.1	Crassostrea_virginica_species_rna-XM_022485570.1
group23722	other_ortholog	Bathymodiolus_platifrons_species_2318:Bpl_scaf_920-5.15-mRNA-1	Lottia_gigantea_species_rna-XM_009054145.1
group12426	other_ortholog	Crassostrea_gigas_species_EVM0008067.1	Crassostrea_gigas_species_EVM0002561.1	Crassostrea_virginica_species_rna-XM_022463132.1	Crassostrea_virginica_species_rna-XM_022463133.1	Crassostrea_virginica_species_rna-XM_022457886.1
group24505	species_special	Corbicula_fluminea_species_EVM0014285.1	Corbicula_fluminea_species_EVM0035084.1
group43378	species_special	Corbicula_fluminea_species_EVM0023516.1
group36341	species_special	Bathymodiolus_platifrons_species_12681:Bpl_scaf_41128-11.15-mRNA-1
group18280	other_ortholog	Crassostrea_gigas_species_EVM0011118.1	Crassostrea_virginica_species_rna-XM_022454879.1	Lottia_gigantea_species_rna-XM_009050847.1
group16369	species_special	Bathymodiolus_platifrons_species_2712:Bpl_scaf_10100-1.15-mRNA-1	Bathymodiolus_platifrons_species_18775:Bpl_scaf_59494-1.13-mRNA-1	Bathymodiolus_platifrons_species_18775:Bpl_scaf_59494-1.33-mRNA-1
group70904	species_special	Lottia_gigantea_species_rna-XM_009068123.1
group4441	multi_ortholog	Bathymodiolus_platifrons_species_5706:Bpl_scaf_48965-3.7-mRNA-1	Corbicula_fluminea_species_EVM0038636.1	Lottia_gigantea_species_rna-XM_009067567.1	Crassostrea_virginica_species_rna-XM_022487796.1	Crassostrea_virginica_species_rna-XM_022487804.1	Crassostrea_gigas_species_EVM0034003.1	Crassostrea_virginica_species_rna-XM_022487788.1	Crassostrea_gigas_species_EVM0052148.1
group54691	species_special	Crassostrea_gigas_species_EVM0053280.1
group19801	other_ortholog	Crassostrea_gigas_species_EVM0058498.1	Crassostrea_gigas_species_EVM0004011.1	Crassostrea_virginica_species_rna-XM_022431148.1
group43636	species_special	Corbicula_fluminea_species_EVM0023425.1
group17447	species_special	Corbicula_fluminea_species_EVM0026292.1	Corbicula_fluminea_species_EVM0004880.1	Corbicula_fluminea_species_EVM0024218.1
group65142	species_special	Lottia_gigantea_species_rna-XM_009054329.1
group2247	multi_ortholog	Bathymodiolus_platifrons_species_7211:Bpl_scaf_11942-0.11-mRNA-1	Crassostrea_gigas_species_EVM0015060.1	Crassostrea_gigas_species_EVM0029709.1	Crassostrea_virginica_species_rna-XM_022484535.1	Corbicula_fluminea_species_EVM0000241.1	Corbicula_fluminea_species_EVM0023623.1	Lottia_gigantea_species_rna-XM_009053950.1	Bathymodiolus_platifrons_species_5423:Bpl_scaf_65556-2.6-mRNA-1	Corbicula_fluminea_species_EVM0008068.1	Crassostrea_gigas_species_EVM0001886.1	Crassostrea_gigas_species_EVM0056512.1
group5904	other_ortholog	Bathymodiolus_platifrons_species_5414:Bpl_scaf_46651-2.13-mRNA-1	Lottia_gigantea_species_rna-XM_009045701.1	Crassostrea_virginica_species_rna-XM_022477762.1	Crassostrea_gigas_species_EVM0057860.1	Bathymodiolus_platifrons_species_16389:Bpl_scaf_54972-2.2-mRNA-1	Crassostrea_virginica_species_rna-XM_022477761.1	Crassostrea_gigas_species_EVM0041877.1
group5692	multi_ortholog	Bathymodiolus_platifrons_species_9808:Bpl_scaf_34753-1.25-mRNA-1	Crassostrea_gigas_species_EVM0049493.1	Crassostrea_gigas_species_EVM0039802.1	Crassostrea_virginica_species_rna-XM_022482424.1	Crassostrea_virginica_species_rna-XM_022487454.1	Corbicula_fluminea_species_EVM0003852.1	Lottia_gigantea_species_rna-XM_009063263.1
group21482	species_special	Crassostrea_virginica_species_rna-XM_022479661.1	Crassostrea_virginica_species_rna-XM_022479659.1	Crassostrea_virginica_species_rna-XM_022479660.1
group34509	species_special	Bathymodiolus_platifrons_species_12543:Bpl_scaf_2991-0.7-mRNA-1
group28464	species_special	Crassostrea_gigas_species_EVM0000070.1	Crassostrea_gigas_species_EVM0046609.1
group49627	species_special	Corbicula_fluminea_species_EVM0003904.1
group6165	other_ortholog	Bathymodiolus_platifrons_species_388:Bpl_scaf_57484-13.9-mRNA-1	Crassostrea_gigas_species_EVM0052250.1	Crassostrea_gigas_species_EVM0038414.1	Crassostrea_virginica_species_rna-XM_022482366.1	Crassostrea_virginica_species_rna-XM_022488964.1	Crassostrea_gigas_species_EVM0002567.1	Crassostrea_gigas_species_EVM0006961.1
group9741	other_ortholog	Crassostrea_gigas_species_EVM0013443.1	Crassostrea_gigas_species_EVM0024162.1	Crassostrea_virginica_species_rna-XM_022435355.1	Crassostrea_gigas_species_EVM0051773.1	Crassostrea_gigas_species_EVM0012610.1	Crassostrea_virginica_species_rna-XM_022450584.1
group18490	other_ortholog	Crassostrea_gigas_species_EVM0007864.1	Crassostrea_gigas_species_EVM0031446.1	Crassostrea_virginica_species_rna-XM_022458653.1
group49329	species_special	Corbicula_fluminea_species_EVM0009446.1
group32132	species_special	Bathymodiolus_platifrons_species_8761:Bpl_scaf_16143-6.11-mRNA-1
group69088	species_special	Lottia_gigantea_species_rna-XM_009063726.1
group48853	species_special	Corbicula_fluminea_species_EVM0016751.1
group9848	other_ortholog	Crassostrea_gigas_species_EVM0016092.2	Crassostrea_gigas_species_EVM0020940.1	Crassostrea_virginica_species_rna-XM_022462210.1	Crassostrea_virginica_species_rna-XM_022462211.1	Crassostrea_virginica_species_rna-XM_022463185.1	Crassostrea_virginica_species_rna-XM_022463186.1
group14220	other_ortholog	Crassostrea_gigas_species_EVM0018921.1	Crassostrea_gigas_species_EVM0057944.1	Crassostrea_gigas_species_EVM0036287.1	Crassostrea_virginica_species_rna-XM_022454219.1
group23382	species_special	Bathymodiolus_platifrons_species_1264:Bpl_scaf_51190-0.8-mRNA-1	Bathymodiolus_platifrons_species_10986:Bpl_scaf_7999-0.7-mRNA-1
group65714	species_special	Lottia_gigantea_species_rna-XM_009055714.1
group56203	species_special	Crassostrea_gigas_species_EVM0032860.1
group10631	species_special	Bathymodiolus_platifrons_species_1211:Bpl_scaf_40888-0.0-mRNA-1	Bathymodiolus_platifrons_species_7124:Bpl_scaf_7423-7.3-mRNA-1	Bathymodiolus_platifrons_species_1211:Bpl_scaf_40888-0.1-mRNA-1	Bathymodiolus_platifrons_species_7124:Bpl_scaf_7423-8.24-mRNA-1	Bathymodiolus_platifrons_species_7124:Bpl_scaf_7423-7.4-mRNA-1
group36189	species_special	Bathymodiolus_platifrons_species_17757:Bpl_scaf_40595-3.4-mRNA-1
group8431	multi_ortholog	Bathymodiolus_platifrons_species_8653:Bpl_scaf_54129-6.8-mRNA-1	Crassostrea_virginica_species_rna-XM_022459648.1	Crassostrea_gigas_species_EVM0031364.1	Crassostrea_gigas_species_EVM0052599.1	Corbicula_fluminea_species_EVM0000253.1	Lottia_gigantea_species_rna-XM_009066313.1
group63243	species_special	Lottia_gigantea_species_rna-XM_009049973.1
group56875	species_special	Crassostrea_gigas_species_EVM0038584.1
group40299	species_special	Bathymodiolus_platifrons_species_14597:Bpl_scaf_62577-3.10-mRNA-1
group65528	species_special	Lottia_gigantea_species_rna-XM_009055292.1
group41286	species_special	Bathymodiolus_platifrons_species_3663:Bpl_scaf_9316-5.18-mRNA-1
group47263	species_special	Corbicula_fluminea_species_EVM0000328.1
group33981	species_special	Bathymodiolus_platifrons_species_6020:Bpl_scaf_27116-6.22-mRNA-1
group3823	other_ortholog	Crassostrea_gigas_species_EVM0049852.1	Crassostrea_gigas_species_EVM0049293.1	Crassostrea_virginica_species_rna-XM_022487235.1	Crassostrea_virginica_species_rna-XM_022487237.1	Crassostrea_virginica_species_rna-XM_022487234.1	Crassostrea_virginica_species_rna-XM_022487240.1	Crassostrea_virginica_species_rna-XM_022487238.1	Crassostrea_virginica_species_rna-XM_022487236.1	Crassostrea_virginica_species_rna-XM_022487239.1
group28769	species_special	Crassostrea_gigas_species_EVM0043704.1	Crassostrea_gigas_species_EVM0004960.1
group61949	species_special	Lottia_gigantea_species_rna-XM_009047084.1
group44763	species_special	Corbicula_fluminea_species_EVM0015534.1
group46520	species_special	Corbicula_fluminea_species_EVM0003545.1
group51948	species_special	Corbicula_fluminea_species_EVM0003395.1
group63808	species_special	Lottia_gigantea_species_rna-XM_009051279.1
group44982	species_special	Corbicula_fluminea_species_EVM0034057.1
group15859	other_ortholog	Crassostrea_gigas_species_EVM0010168.1	Crassostrea_gigas_species_EVM0004248.1	Crassostrea_virginica_species_rna-XM_022463820.1	Crassostrea_virginica_species_rna-XM_022463116.1
group5860	species_special	Bathymodiolus_platifrons_species_12349:Bpl_scaf_44625-0.2-mRNA-1	Bathymodiolus_platifrons_species_16925:Bpl_scaf_47430-1.6-mRNA-1	Bathymodiolus_platifrons_species_7477:Bpl_scaf_48528-5.17-mRNA-1	Bathymodiolus_platifrons_species_3415:Bpl_scaf_6051-1.8-mRNA-1	Bathymodiolus_platifrons_species_4613:Bpl_scaf_6407-0.7-mRNA-1	Bathymodiolus_platifrons_species_15329:Bpl_scaf_46578-8.10-mRNA-1	Bathymodiolus_platifrons_species_6899:Bpl_scaf_48191-0.2-mRNA-1
group56034	species_special	Crassostrea_gigas_species_EVM0031103.1
group23748	species_special	Corbicula_fluminea_species_EVM0026762.1	Corbicula_fluminea_species_EVM0024040.1
group29947	species_special	Crassostrea_virginica_species_rna-XM_022469054.1	Crassostrea_virginica_species_rna-XM_022472348.1
group52231	species_special	Corbicula_fluminea_species_EVM0025350.1
group52851	species_special	Corbicula_fluminea_species_EVM0010031.1
group31256	species_special	Bathymodiolus_platifrons_species_2942:Bpl_scaf_10277-2.10-mRNA-1
group55147	species_special	Crassostrea_gigas_species_EVM0027924.1
group61064	species_special	Crassostrea_virginica_species_rna-XM_022452654.1
group37493	species_special	Bathymodiolus_platifrons_species_15309:Bpl_scaf_48237-0.0-mRNA-1
group58000	species_special	Crassostrea_gigas_species_EVM0022601.2
group66478	species_special	Lottia_gigantea_species_rna-XM_009057517.1
group23541	species_special	Bathymodiolus_platifrons_species_7171:Bpl_scaf_57332-0.8-mRNA-1	Bathymodiolus_platifrons_species_18800:Bpl_scaf_60133-0.18-mRNA-1
group21863	species_special	Lottia_gigantea_species_rna-XM_009062519.1	Lottia_gigantea_species_rna-XM_009064182.1	Lottia_gigantea_species_rna-XM_009062521.1
group30432	species_special	Crassostrea_virginica_species_rna-XM_022443022.1	Crassostrea_virginica_species_rna-XM_022453392.1
group58864	species_special	Crassostrea_virginica_species_rna-XM_022437747.1
group59446	species_special	Crassostrea_virginica_species_rna-XM_022479169.1
group23525	species_special	Bathymodiolus_platifrons_species_8912:Bpl_scaf_56339-1.15-mRNA-1	Bathymodiolus_platifrons_species_8912:Bpl_scaf_56339-2.16-mRNA-1
group55879	species_special	Crassostrea_gigas_species_EVM0004035.1
group7119	multi_ortholog	Bathymodiolus_platifrons_species_13892:Bpl_scaf_10347-4.13-mRNA-1	Corbicula_fluminea_species_EVM0023685.1	Crassostrea_gigas_species_EVM0039196.1	Crassostrea_gigas_species_EVM0053778.1	Crassostrea_virginica_species_rna-XM_022447406.1	Lottia_gigantea_species_rna-XM_009050299.1
group59556	species_special	Crassostrea_virginica_species_rna-XM_022479509.1
group12111	other_ortholog	Crassostrea_gigas_species_EVM0054073.1	Crassostrea_gigas_species_EVM0028272.1	Crassostrea_virginica_species_rna-XM_022483287.1	Crassostrea_virginica_species_rna-XM_022483289.1	Crassostrea_virginica_species_rna-XM_022483288.1
group4825	species_special	Crassostrea_gigas_species_EVM0055512.1	Crassostrea_gigas_species_EVM0031671.1	Crassostrea_gigas_species_EVM0026522.1	Crassostrea_gigas_species_EVM0052643.1	Crassostrea_gigas_species_EVM0018516.1	Crassostrea_gigas_species_EVM0045942.1	Crassostrea_gigas_species_EVM0036172.1	Crassostrea_gigas_species_EVM0052066.1
group45518	species_special	Corbicula_fluminea_species_EVM0026731.1
group6091	multi_ortholog	Bathymodiolus_platifrons_species_15812:Bpl_scaf_54651-5.11-mRNA-1	Crassostrea_gigas_species_EVM0002118.1	Crassostrea_virginica_species_rna-XM_022432988.1	Crassostrea_virginica_species_rna-XM_022433302.1	Crassostrea_gigas_species_EVM0005623.1	Lottia_gigantea_species_rna-XM_009063733.1	Corbicula_fluminea_species_EVM0011589.1
group62292	species_special	Lottia_gigantea_species_rna-XM_009047907.1
group51659	species_special	Corbicula_fluminea_species_EVM0035902.1
group63190	species_special	Lottia_gigantea_species_rna-XM_009049841.1
group53942	species_special	Crassostrea_gigas_species_EVM0035504.1
group14326	other_ortholog	Crassostrea_gigas_species_EVM0058382.1	Crassostrea_gigas_species_EVM0040464.1	Crassostrea_virginica_species_rna-XM_022458881.1	Crassostrea_virginica_species_rna-XM_022458890.1
group27263	species_special	Crassostrea_gigas_species_EVM0047282.1	Crassostrea_gigas_species_EVM0003435.1
group39197	species_special	Bathymodiolus_platifrons_species_15655:Bpl_scaf_56778-0.13-mRNA-1
group18523	other_ortholog	Crassostrea_gigas_species_EVM0048740.1	Crassostrea_gigas_species_EVM0042453.1	Crassostrea_virginica_species_rna-XM_022467718.1
group13815	other_ortholog	Corbicula_fluminea_species_EVM0024375.1	Crassostrea_gigas_species_EVM0037328.1	Crassostrea_gigas_species_EVM0055215.1	Crassostrea_virginica_species_rna-XM_022470115.1
group20321	other_ortholog	Crassostrea_gigas_species_EVM0006822.1	Crassostrea_gigas_species_EVM0044112.1	Crassostrea_virginica_species_rna-XM_022465698.1
group55138	species_special	Crassostrea_gigas_species_EVM0016942.1
group45598	species_special	Corbicula_fluminea_species_EVM0018687.1
group36002	species_special	Bathymodiolus_platifrons_species_3126:Bpl_scaf_38861-2.10-mRNA-1
group27351	species_special	Crassostrea_gigas_species_EVM0053282.1	Crassostrea_gigas_species_EVM0033030.1
group35456	species_special	Bathymodiolus_platifrons_species_7024:Bpl_scaf_35557-0.0-mRNA-1
group52967	species_special	Corbicula_fluminea_species_EVM0030702.1
group5794	multi_ortholog	Bathymodiolus_platifrons_species_9139:Bpl_scaf_40950-0.8-mRNA-1	Crassostrea_virginica_species_rna-XM_022470305.1	Crassostrea_virginica_species_rna-XM_022470304.1	Crassostrea_gigas_species_EVM0038153.1	Crassostrea_gigas_species_EVM0034639.1	Corbicula_fluminea_species_EVM0023241.2	Lottia_gigantea_species_rna-XM_009050867.1
group33946	species_special	Bathymodiolus_platifrons_species_8866:Bpl_scaf_26739-3.24-mRNA-1
group63925	species_special	Lottia_gigantea_species_rna-XM_009051508.1
group18091	species_special	Corbicula_fluminea_species_EVM0035269.1	Corbicula_fluminea_species_EVM0002687.1	Corbicula_fluminea_species_EVM0037242.1
group14338	other_ortholog	Crassostrea_gigas_species_EVM0051435.1	Crassostrea_virginica_species_rna-XM_022445208.1	Crassostrea_virginica_species_rna-XM_022432680.1	Crassostrea_virginica_species_rna-XM_022432679.1
group50257	species_special	Corbicula_fluminea_species_EVM0023246.1
group43781	species_special	Corbicula_fluminea_species_EVM0036087.1
group63027	species_special	Lottia_gigantea_species_rna-XM_009049505.1
group46518	species_special	Corbicula_fluminea_species_EVM0037105.1
group24144	species_special	Corbicula_fluminea_species_EVM0007318.1	Corbicula_fluminea_species_EVM0037835.1
group38266	species_special	Bathymodiolus_platifrons_species_6308:Bpl_scaf_52750-0.19-mRNA-1
group65763	species_special	Lottia_gigantea_species_rna-XM_009055835.1
group46751	species_special	Corbicula_fluminea_species_EVM0011874.1
group7048	species_special	Crassostrea_virginica_species_rna-XM_022446278.1	Crassostrea_virginica_species_rna-XM_022446279.1	Crassostrea_virginica_species_rna-XM_022446998.1	Crassostrea_virginica_species_rna-XM_022446280.1	Crassostrea_virginica_species_rna-XM_022446920.1	Crassostrea_virginica_species_rna-XM_022446921.1	Crassostrea_virginica_species_rna-XM_022446922.1
group31240	species_special	Bathymodiolus_platifrons_species_11754:Bpl_scaf_1023-0.1-mRNA-1
group9522	other_ortholog	Crassostrea_gigas_species_EVM0038585.1	Crassostrea_gigas_species_EVM0009974.1	Crassostrea_virginica_species_rna-XM_022433756.1	Crassostrea_virginica_species_rna-XM_022431483.1	Crassostrea_gigas_species_EVM0056163.1	Crassostrea_gigas_species_EVM0022516.1
group39933	species_special	Bathymodiolus_platifrons_species_14365:Bpl_scaf_60774-10.1-mRNA-1
group44361	species_special	Corbicula_fluminea_species_EVM0019448.1
group40148	species_special	Bathymodiolus_platifrons_species_6211:Bpl_scaf_61932-0.12-mRNA-1
group60123	species_special	Crassostrea_virginica_species_rna-XM_022434827.1
group56969	species_special	Crassostrea_gigas_species_EVM0052314.1
group58504	species_special	Crassostrea_gigas_species_EVM0022578.1
group29089	other_ortholog	Crassostrea_gigas_species_EVM0036230.1	Crassostrea_virginica_species_rna-XM_022447523.1
group59005	species_special	Crassostrea_virginica_species_rna-XM_022461817.1
group69232	species_special	Lottia_gigantea_species_rna-XM_009064043.1
group47063	species_special	Corbicula_fluminea_species_EVM0004645.1
group26887	other_ortholog	Crassostrea_gigas_species_EVM0005347.1	Crassostrea_virginica_species_rna-XM_022455814.1
group33703	species_special	Bathymodiolus_platifrons_species_9439:Bpl_scaf_25048-2.13-mRNA-1
group218	species_special	Crassostrea_virginica_species_rna-XM_022467387.1	Crassostrea_virginica_species_rna-XM_022465056.1	Crassostrea_virginica_species_rna-XM_022465058.1	Crassostrea_virginica_species_rna-XM_022465057.1	Crassostrea_virginica_species_rna-XM_022465059.1	Crassostrea_virginica_species_rna-XM_022465060.1	Crassostrea_virginica_species_rna-XM_022465061.1	Crassostrea_virginica_species_rna-XM_022467378.1	Crassostrea_virginica_species_rna-XM_022467376.1	Crassostrea_virginica_species_rna-XM_022467377.1	Crassostrea_virginica_species_rna-XM_022467371.1	Crassostrea_virginica_species_rna-XM_022467367.1	Crassostrea_virginica_species_rna-XM_022467368.1	Crassostrea_virginica_species_rna-XM_022467370.1	Crassostrea_virginica_species_rna-XM_022467373.1	Crassostrea_virginica_species_rna-XM_022467374.1	Crassostrea_virginica_species_rna-XM_022467372.1	Crassostrea_virginica_species_rna-XM_022467369.1	Crassostrea_virginica_species_rna-XM_022467379.1	Crassostrea_virginica_species_rna-XM_022467366.1	Crassostrea_virginica_species_rna-XM_022467365.1	Crassostrea_virginica_species_rna-XM_022465581.1	Crassostrea_virginica_species_rna-XM_022465579.1	Crassostrea_virginica_species_rna-XM_022467381.1	Crassostrea_virginica_species_rna-XM_022467380.1	Crassostrea_virginica_species_rna-XM_022467375.1	Crassostrea_virginica_species_rna-XM_022467383.1	Crassostrea_virginica_species_rna-XM_022467382.1	Crassostrea_virginica_species_rna-XM_022465582.1	Crassostrea_virginica_species_rna-XM_022467386.1	Crassostrea_virginica_species_rna-XM_022467385.1	Crassostrea_virginica_species_rna-XM_022467384.1	Crassostrea_virginica_species_rna-XM_022467388.1
group67638	species_special	Lottia_gigantea_species_rna-XM_009060376.1
group47921	species_special	Corbicula_fluminea_species_EVM0001943.1
group13575	species_special	Corbicula_fluminea_species_EVM0016465.1	Corbicula_fluminea_species_EVM0018956.1	Corbicula_fluminea_species_EVM0032113.1	Corbicula_fluminea_species_EVM0025774.1
group12939	species_special	Bathymodiolus_platifrons_species_12835:Bpl_scaf_19600-0.7-mRNA-1	Bathymodiolus_platifrons_species_14189:Bpl_scaf_49544-0.3-mRNA-1	Bathymodiolus_platifrons_species_8220:Bpl_scaf_25595-0.11-mRNA-1	Bathymodiolus_platifrons_species_4340:Bpl_scaf_6191-0.3-mRNA-1
group21068	other_ortholog	Crassostrea_gigas_species_EVM0004845.1	Crassostrea_gigas_species_EVM0055864.1	Crassostrea_virginica_species_rna-XM_022463212.1
group59121	species_special	Crassostrea_virginica_species_rna-XM_022472727.1
group46992	species_special	Corbicula_fluminea_species_EVM0004044.1
group35200	species_special	Bathymodiolus_platifrons_species_14779:Bpl_scaf_34294-0.0-mRNA-1
group70506	species_special	Lottia_gigantea_species_rna-XM_009067236.1
group45939	species_special	Corbicula_fluminea_species_EVM0020660.1
group43829	species_special	Corbicula_fluminea_species_EVM0001910.1
group26878	species_special	Crassostrea_gigas_species_EVM0016963.1	Crassostrea_gigas_species_EVM0004289.1
group66737	species_special	Lottia_gigantea_species_rna-XM_009058166.1
group1134	other_ortholog	Crassostrea_virginica_species_rna-XM_022456367.1	Crassostrea_virginica_species_rna-XM_022455657.1	Crassostrea_virginica_species_rna-XM_022455195.1	Crassostrea_gigas_species_EVM0053657.1	Crassostrea_virginica_species_rna-XM_022455658.1	Crassostrea_virginica_species_rna-XM_022456714.1	Crassostrea_virginica_species_rna-XM_022456715.1	Crassostrea_virginica_species_rna-XM_022456716.1	Crassostrea_gigas_species_EVM0023911.1	Crassostrea_gigas_species_EVM0013264.1	Crassostrea_virginica_species_rna-XM_022456366.1	Crassostrea_virginica_species_rna-XM_022456365.1	Crassostrea_virginica_species_rna-XM_022456717.1	Crassostrea_gigas_species_EVM0009560.1	Crassostrea_virginica_species_rna-XM_022455659.1	Crassostrea_gigas_species_EVM0014213.1
group53961	species_special	Crassostrea_gigas_species_EVM0055663.1
group1825	other_ortholog	Crassostrea_gigas_species_EVM0049306.1	Crassostrea_gigas_species_EVM0017679.1	Crassostrea_gigas_species_EVM0053774.1	Crassostrea_gigas_species_EVM0026010.1	Crassostrea_gigas_species_EVM0017508.1	Crassostrea_gigas_species_EVM0026531.1	Crassostrea_gigas_species_EVM0028150.1	Crassostrea_gigas_species_EVM0035339.1	Crassostrea_gigas_species_EVM0040550.1	Crassostrea_gigas_species_EVM0049933.1	Crassostrea_gigas_species_EVM0038132.1	Crassostrea_virginica_species_rna-XM_022453681.1	Crassostrea_gigas_species_EVM0024485.1
group47525	species_special	Corbicula_fluminea_species_EVM0036922.1
group28138	other_ortholog	Crassostrea_gigas_species_EVM0017982.1	Crassostrea_virginica_species_rna-XM_022487875.1
group63386	species_special	Lottia_gigantea_species_rna-XM_009050314.1
group3659	other_ortholog	Corbicula_fluminea_species_EVM0012266.1	Crassostrea_virginica_species_rna-XM_022483856.1	Crassostrea_virginica_species_rna-XM_022483854.1	Crassostrea_virginica_species_rna-XM_022483857.1	Crassostrea_virginica_species_rna-XM_022483853.1	Crassostrea_gigas_species_EVM0027684.1	Crassostrea_virginica_species_rna-XM_022483858.1	Lottia_gigantea_species_rna-XM_009059891.1	Crassostrea_gigas_species_EVM0041991.1
group345	multi_ortholog	Bathymodiolus_platifrons_species_18583:Bpl_scaf_26757-3.20-mRNA-1	Crassostrea_gigas_species_EVM0016837.1	Crassostrea_virginica_species_rna-XM_022471177.1	Crassostrea_virginica_species_rna-XM_022466657.1	Corbicula_fluminea_species_EVM0022587.1	Lottia_gigantea_species_rna-XM_009046288.1	Corbicula_fluminea_species_EVM0005047.1	Crassostrea_gigas_species_EVM0008579.1	Corbicula_fluminea_species_EVM0001106.1	Corbicula_fluminea_species_EVM0038339.2	Lottia_gigantea_species_rna-XM_009046289.1	Crassostrea_gigas_species_EVM0032859.2	Crassostrea_gigas_species_EVM0025416.2	Corbicula_fluminea_species_EVM0028665.1	Crassostrea_virginica_species_rna-XM_022471703.1	Crassostrea_virginica_species_rna-XM_022471702.1	Crassostrea_virginica_species_rna-XM_022471701.1	Crassostrea_virginica_species_rna-XM_022471704.1	Crassostrea_virginica_species_rna-XM_022471705.1	Crassostrea_virginica_species_rna-XM_022466652.1	Crassostrea_virginica_species_rna-XM_022466653.1	Corbicula_fluminea_species_EVM0037500.1	Corbicula_fluminea_species_EVM0033059.1	Corbicula_fluminea_species_EVM0002760.1	Corbicula_fluminea_species_EVM0027794.1	Crassostrea_virginica_species_rna-XM_022466654.1	Crassostrea_virginica_species_rna-XM_022466655.1
group54724	species_special	Crassostrea_gigas_species_EVM0040677.1
group44628	species_special	Corbicula_fluminea_species_EVM0024865.1
group69913	species_special	Lottia_gigantea_species_rna-XM_009065711.1
group50463	species_special	Corbicula_fluminea_species_EVM0005375.1
group9327	species_special	Crassostrea_gigas_species_EVM0011078.1	Crassostrea_gigas_species_EVM0032304.1	Crassostrea_gigas_species_EVM0021081.1	Crassostrea_gigas_species_EVM0028053.1	Crassostrea_gigas_species_EVM0054481.1	Crassostrea_gigas_species_EVM0047216.1
group33344	species_special	Bathymodiolus_platifrons_species_4886:Bpl_scaf_23287-7.31-mRNA-1
group7551	multi_ortholog	Bathymodiolus_platifrons_species_18500:Bpl_scaf_23346-3.7-mRNA-1	Crassostrea_virginica_species_rna-XM_022485284.1	Crassostrea_gigas_species_EVM0058246.1	Crassostrea_gigas_species_EVM0003331.1	Lottia_gigantea_species_rna-XM_009052195.1	Corbicula_fluminea_species_EVM0003142.1
group35869	species_special	Bathymodiolus_platifrons_species_17795:Bpl_scaf_38266-9.7-mRNA-1
group62970	species_special	Lottia_gigantea_species_rna-XM_009049387.1
group29254	species_special	Crassostrea_gigas_species_EVM0021113.1	Crassostrea_gigas_species_EVM0007490.1
group54771	species_special	Crassostrea_gigas_species_EVM0022464.1
group582	species_special	Crassostrea_virginica_species_rna-XM_022444511.1	Crassostrea_virginica_species_rna-XM_022448902.1	Crassostrea_virginica_species_rna-XM_022448901.1	Crassostrea_virginica_species_rna-XM_022450364.1	Crassostrea_virginica_species_rna-XM_022450367.1	Crassostrea_virginica_species_rna-XM_022450369.1	Crassostrea_virginica_species_rna-XM_022450370.1	Crassostrea_virginica_species_rna-XM_022450372.1	Crassostrea_virginica_species_rna-XM_022450371.1	Crassostrea_virginica_species_rna-XM_022448906.1	Crassostrea_virginica_species_rna-XM_022449389.1	Crassostrea_virginica_species_rna-XM_022450886.1	Crassostrea_virginica_species_rna-XM_022455122.1	Crassostrea_virginica_species_rna-XM_022455123.1	Crassostrea_virginica_species_rna-XM_022447729.1	Crassostrea_virginica_species_rna-XM_022450363.1	Crassostrea_virginica_species_rna-XM_022455124.1	Crassostrea_virginica_species_rna-XM_022450362.1	Crassostrea_virginica_species_rna-XM_022453048.1	Crassostrea_virginica_species_rna-XM_022453046.1	Crassostrea_virginica_species_rna-XM_022453045.1	Crassostrea_virginica_species_rna-XM_022453047.1
group43766	species_special	Corbicula_fluminea_species_EVM0035236.1
group61343	species_special	Lottia_gigantea_species_rna-XM_009045633.1
group40520	species_special	Bathymodiolus_platifrons_species_220:Bpl_scaf_6373-13.12-mRNA-1
group56890	species_special	Crassostrea_gigas_species_EVM0001811.1
group28145	species_special	Crassostrea_gigas_species_EVM0037762.1	Crassostrea_gigas_species_EVM0035250.1
group37935	species_special	Bathymodiolus_platifrons_species_3269:Bpl_scaf_50488-0.16-mRNA-1
group4005	multi_ortholog	Bathymodiolus_platifrons_species_15939:Bpl_scaf_12973-0.19-mRNA-1	Crassostrea_gigas_species_EVM0027211.1	Crassostrea_virginica_species_rna-XM_022437719.1	Crassostrea_gigas_species_EVM0028431.1	Corbicula_fluminea_species_EVM0018587.1	Lottia_gigantea_species_rna-XM_009063930.1	Lottia_gigantea_species_rna-XM_009063928.1	Corbicula_fluminea_species_EVM0013008.1
group68776	species_special	Lottia_gigantea_species_rna-XM_009063060.1
group39327	species_special	Bathymodiolus_platifrons_species_18158:Bpl_scaf_57331-0.10-mRNA-1
group32019	species_special	Bathymodiolus_platifrons_species_4572:Bpl_scaf_15516-4.4-mRNA-1
group46618	species_special	Corbicula_fluminea_species_EVM0026398.1
group13085	other_ortholog	Bathymodiolus_platifrons_species_10287:Bpl_scaf_27157-0.3-mRNA-1	Crassostrea_gigas_species_EVM0057859.1	Crassostrea_virginica_species_rna-XM_022440316.1	Crassostrea_gigas_species_EVM0016843.1
group19932	other_ortholog	Crassostrea_gigas_species_EVM0044850.1	Crassostrea_gigas_species_EVM0052310.1	Crassostrea_virginica_species_rna-XM_022481243.1
group4982	other_ortholog	Crassostrea_gigas_species_EVM0021522.1	Crassostrea_gigas_species_EVM0047693.1	Crassostrea_gigas_species_EVM0043564.2	Crassostrea_gigas_species_EVM0034758.2	Crassostrea_gigas_species_EVM0020893.1	Crassostrea_gigas_species_EVM0027200.1	Crassostrea_virginica_species_rna-XM_022479849.1	Crassostrea_virginica_species_rna-XM_022479848.1
group41345	species_special	Bathymodiolus_platifrons_species_6770:Bpl_scaf_9536-0.4-mRNA-1
group3613	multi_ortholog	Bathymodiolus_platifrons_species_15805:Bpl_scaf_9153-4.14-mRNA-1	Crassostrea_virginica_species_rna-XM_022471200.1	Crassostrea_virginica_species_rna-XM_022471201.1	Crassostrea_virginica_species_rna-XM_022471198.1	Crassostrea_virginica_species_rna-XM_022471199.1	Crassostrea_gigas_species_EVM0055299.1	Corbicula_fluminea_species_EVM0037313.2	Crassostrea_gigas_species_EVM0001487.1	Lottia_gigantea_species_rna-XM_009049154.1
group19305	other_ortholog	Crassostrea_gigas_species_EVM0055982.1	Crassostrea_gigas_species_EVM0038821.2	Crassostrea_virginica_species_rna-XM_022431839.1
group31656	species_special	Bathymodiolus_platifrons_species_10544:Bpl_scaf_13059-1.14-mRNA-1
group38117	species_special	Bathymodiolus_platifrons_species_5255:Bpl_scaf_51814-0.6-mRNA-1
group47600	species_special	Corbicula_fluminea_species_EVM0020928.1
group16606	species_special	Bathymodiolus_platifrons_species_1809:Bpl_scaf_8052-0.7-mRNA-1	Bathymodiolus_platifrons_species_1809:Bpl_scaf_8052-0.0-mRNA-1	Bathymodiolus_platifrons_species_9834:Bpl_scaf_8775-9.5-mRNA-1
group64732	species_special	Lottia_gigantea_species_rna-XM_009053443.1
group37356	species_special	Bathymodiolus_platifrons_species_10125:Bpl_scaf_47548-0.4-mRNA-1
group18318	other_ortholog	Crassostrea_gigas_species_EVM0050426.1	Crassostrea_virginica_species_rna-XM_022439320.1	Crassostrea_virginica_species_rna-XM_022443671.1
group67160	species_special	Lottia_gigantea_species_rna-XM_009059220.1
group51488	species_special	Corbicula_fluminea_species_EVM0003992.1
group29954	species_special	Crassostrea_virginica_species_rna-XM_022464664.1	Crassostrea_virginica_species_rna-XM_022466181.1
group39887	species_special	Bathymodiolus_platifrons_species_5920:Bpl_scaf_6068-0.9-mRNA-1
group30772	species_special	Lottia_gigantea_species_rna-XM_009050242.1	Lottia_gigantea_species_rna-XM_009068937.1
group49443	species_special	Corbicula_fluminea_species_EVM0002033.1
group1382	species_special	Bathymodiolus_platifrons_species_12973:Bpl_scaf_17025-0.24-mRNA-1	Bathymodiolus_platifrons_species_10306:Bpl_scaf_48146-0.0-mRNA-1	Bathymodiolus_platifrons_species_17652:Bpl_scaf_58007-0.7-mRNA-1	Bathymodiolus_platifrons_species_13508:Bpl_scaf_57670-0.9-mRNA-1	Bathymodiolus_platifrons_species_12795:Bpl_scaf_49821-2.7-mRNA-1	Bathymodiolus_platifrons_species_211:Bpl_scaf_60734-0.2-mRNA-1	Bathymodiolus_platifrons_species_2662:Bpl_scaf_25032-0.2-mRNA-1	Bathymodiolus_platifrons_species_12973:Bpl_scaf_17025-0.30-mRNA-1	Bathymodiolus_platifrons_species_12973:Bpl_scaf_17025-0.27-mRNA-1	Bathymodiolus_platifrons_species_12973:Bpl_scaf_17025-0.26-mRNA-1	Bathymodiolus_platifrons_species_13508:Bpl_scaf_57670-1.8-mRNA-1	Bathymodiolus_platifrons_species_12973:Bpl_scaf_17025-0.29-mRNA-1	Bathymodiolus_platifrons_species_10306:Bpl_scaf_48146-0.17-mRNA-1	Bathymodiolus_platifrons_species_6943:Bpl_scaf_50475-0.5-mRNA-1
group35804	species_special	Bathymodiolus_platifrons_species_7745:Bpl_scaf_38078-4.6-mRNA-1
group47303	species_special	Corbicula_fluminea_species_EVM0035842.1
group28186	species_special	Crassostrea_gigas_species_EVM0039064.1	Crassostrea_gigas_species_EVM0058112.1
group70620	species_special	Lottia_gigantea_species_rna-XM_009067523.1
group60710	species_special	Crassostrea_virginica_species_rna-XM_022451799.1
group61800	species_special	Lottia_gigantea_species_rna-XM_009046710.1
group22825	species_special	Bathymodiolus_platifrons_species_9292:Bpl_scaf_32250-0.16-mRNA-1	Bathymodiolus_platifrons_species_18767:Bpl_scaf_49160-1.12-mRNA-1
group28597	species_special	Crassostrea_gigas_species_EVM0005580.1	Crassostrea_gigas_species_EVM0003491.1
group12066	other_ortholog	Crassostrea_gigas_species_EVM0018919.1	Crassostrea_gigas_species_EVM0033526.1	Crassostrea_gigas_species_EVM0020682.1	Crassostrea_virginica_species_rna-XM_022480297.1	Crassostrea_gigas_species_EVM0058302.1
group10376	species_special	Bathymodiolus_platifrons_species_241:Bpl_scaf_25006-0.13-mRNA-1	Bathymodiolus_platifrons_species_16398:Bpl_scaf_48682-0.36-mRNA-1	Bathymodiolus_platifrons_species_8548:Bpl_scaf_31289-4.11-mRNA-1	Bathymodiolus_platifrons_species_13533:Bpl_scaf_64029-1.15-mRNA-1	Bathymodiolus_platifrons_species_10370:Bpl_scaf_49352-1.8-mRNA-1
group17693	species_special	Corbicula_fluminea_species_EVM0038198.1	Corbicula_fluminea_species_EVM0034555.1	Corbicula_fluminea_species_EVM0012566.1
group56002	species_special	Crassostrea_gigas_species_EVM0041492.1
group25950	species_special	Corbicula_fluminea_species_EVM0015428.1	Corbicula_fluminea_species_EVM0009113.1
group51818	species_special	Corbicula_fluminea_species_EVM0033575.1
group65125	species_special	Lottia_gigantea_species_rna-XM_009054290.1
group53115	species_special	Corbicula_fluminea_species_EVM0024217.1
group12236	other_ortholog	Crassostrea_gigas_species_EVM0025544.1	Crassostrea_gigas_species_EVM0005171.1	Crassostrea_gigas_species_EVM0054172.1	Crassostrea_gigas_species_EVM0011129.1	Crassostrea_virginica_species_rna-XM_022468535.1
group53451	species_special	Crassostrea_gigas_species_EVM0002467.1
group17629	other_ortholog	Corbicula_fluminea_species_EVM0009641.1	Corbicula_fluminea_species_EVM0020663.1	Lottia_gigantea_species_rna-XM_009056604.1
group3399	multi_ortholog	Bathymodiolus_platifrons_species_18187:Bpl_scaf_34879-4.16-mRNA-1	Crassostrea_virginica_species_rna-XM_022434452.1	Crassostrea_virginica_species_rna-XM_022434453.1	Crassostrea_gigas_species_EVM0034119.1	Crassostrea_gigas_species_EVM0058051.1	Corbicula_fluminea_species_EVM0018039.2	Crassostrea_gigas_species_EVM0022638.1	Lottia_gigantea_species_rna-XM_009058922.1	Crassostrea_gigas_species_EVM0040414.1
group33834	species_special	Bathymodiolus_platifrons_species_4069:Bpl_scaf_25973-3.2-mRNA-1
group48463	species_special	Corbicula_fluminea_species_EVM0032780.1
group64130	species_special	Lottia_gigantea_species_rna-XM_009052014.1
group25330	species_special	Corbicula_fluminea_species_EVM0027300.1	Corbicula_fluminea_species_EVM0004270.1
group64394	species_special	Lottia_gigantea_species_rna-XM_009052712.1
group9678	other_ortholog	Crassostrea_gigas_species_EVM0039340.1	Crassostrea_gigas_species_EVM0055373.1	Crassostrea_virginica_species_rna-XM_022467269.1	Crassostrea_virginica_species_rna-XM_022464918.1	Crassostrea_virginica_species_rna-XM_022467271.1	Crassostrea_virginica_species_rna-XM_022467273.1
group8281	multi_ortholog	Bathymodiolus_platifrons_species_16077:Bpl_scaf_4919-0.2-mRNA-1	Lottia_gigantea_species_rna-XM_009049873.1	Corbicula_fluminea_species_EVM0002574.1	Crassostrea_gigas_species_EVM0051608.1	Crassostrea_gigas_species_EVM0050340.1	Crassostrea_virginica_species_rna-XM_022467669.1
group46253	species_special	Corbicula_fluminea_species_EVM0010784.1
group2427	multi_ortholog	Bathymodiolus_platifrons_species_18543:Bpl_scaf_56928-0.3-mRNA-1	Crassostrea_gigas_species_EVM0003919.1	Crassostrea_gigas_species_EVM0022970.1	Corbicula_fluminea_species_EVM0016731.1	Lottia_gigantea_species_rna-XM_009068379.1	Crassostrea_virginica_species_rna-XM_022483983.1	Crassostrea_virginica_species_rna-XM_022483984.1	Crassostrea_virginica_species_rna-XM_022490417.1	Crassostrea_virginica_species_rna-XM_022483981.1	Crassostrea_virginica_species_rna-XM_022483982.1	Crassostrea_virginica_species_rna-XM_022490416.1
group66322	species_special	Lottia_gigantea_species_rna-XM_009057164.1
group31855	species_special	Bathymodiolus_platifrons_species_4845:Bpl_scaf_14503-1.54-mRNA-1
group48424	species_special	Corbicula_fluminea_species_EVM0030872.1
group35642	species_special	Bathymodiolus_platifrons_species_18215:Bpl_scaf_36688-1.3-mRNA-1
group68029	species_special	Lottia_gigantea_species_rna-XM_009061293.1
group68584	species_special	Lottia_gigantea_species_rna-XM_009062605.1
group51900	species_special	Corbicula_fluminea_species_EVM0009873.1
group39819	species_special	Bathymodiolus_platifrons_species_4783:Bpl_scaf_60284-2.22-mRNA-1
group65886	species_special	Lottia_gigantea_species_rna-XM_009056106.1
group61264	species_special	Lottia_gigantea_species_rna-XM_009045444.1
group63951	species_special	Lottia_gigantea_species_rna-XM_009051601.1
group48259	species_special	Corbicula_fluminea_species_EVM0003913.1
group28022	species_special	Crassostrea_gigas_species_EVM0033428.1	Crassostrea_gigas_species_EVM0034139.1
group51246	species_special	Corbicula_fluminea_species_EVM0003354.1
group21556	species_special	Crassostrea_virginica_species_rna-XM_022437168.1	Crassostrea_virginica_species_rna-XM_022452724.1	Crassostrea_virginica_species_rna-XM_022451155.1
group35981	species_special	Bathymodiolus_platifrons_species_10282:Bpl_scaf_38783-1.16-mRNA-1
group68723	species_special	Lottia_gigantea_species_rna-XM_009062933.1
group25491	species_special	Corbicula_fluminea_species_EVM0013394.1	Corbicula_fluminea_species_EVM0025016.1
group42821	species_special	Corbicula_fluminea_species_EVM0036251.1
group48999	species_special	Corbicula_fluminea_species_EVM0035257.1
group10044	species_special	Bathymodiolus_platifrons_species_1539:Bpl_scaf_64890-0.19-mRNA-1	Bathymodiolus_platifrons_species_5225:Bpl_scaf_62822-0.21-mRNA-1	Bathymodiolus_platifrons_species_9821:Bpl_scaf_46053-3.23-mRNA-1	Bathymodiolus_platifrons_species_931:Bpl_scaf_42281-0.19-mRNA-1	Bathymodiolus_platifrons_species_13294:Bpl_scaf_39318-0.13-mRNA-1
group52778	species_special	Corbicula_fluminea_species_EVM0037095.1
group69270	species_special	Lottia_gigantea_species_rna-XM_009064117.1
group35679	species_special	Bathymodiolus_platifrons_species_4556:Bpl_scaf_36963-1.11-mRNA-1
group9086	other_ortholog	Corbicula_fluminea_species_EVM0013348.2	Corbicula_fluminea_species_EVM0028782.1	Crassostrea_gigas_species_EVM0022115.1	Crassostrea_virginica_species_rna-XM_022437532.1	Crassostrea_virginica_species_rna-XM_022437534.1	Crassostrea_virginica_species_rna-XM_022437535.1
group12677	species_special	Bathymodiolus_platifrons_species_5119:Bpl_scaf_10062-1.0-mRNA-1	Bathymodiolus_platifrons_species_17440:Bpl_scaf_1622-0.0-mRNA-1	Bathymodiolus_platifrons_species_12809:Bpl_scaf_54918-0.0-mRNA-1	Bathymodiolus_platifrons_species_17139:Bpl_scaf_62502-0.0-mRNA-1
group10379	other_ortholog	Bathymodiolus_platifrons_species_15515:Bpl_scaf_25441-5.23-mRNA-1	Corbicula_fluminea_species_EVM0019815.1	Crassostrea_virginica_species_rna-XM_022464320.1	Crassostrea_gigas_species_EVM0051150.1	Crassostrea_gigas_species_EVM0027914.1
group25220	species_special	Corbicula_fluminea_species_EVM0004119.1	Corbicula_fluminea_species_EVM0020788.1
group49530	species_special	Corbicula_fluminea_species_EVM0006637.1
group60535	species_special	Crassostrea_virginica_species_rna-XM_022441186.1
group15095	other_ortholog	Crassostrea_gigas_species_EVM0006731.1	Crassostrea_gigas_species_EVM0001638.1	Crassostrea_virginica_species_rna-XM_022482103.1	Crassostrea_virginica_species_rna-XM_022480479.1
group25373	species_special	Corbicula_fluminea_species_EVM0014953.1	Corbicula_fluminea_species_EVM0015716.1
group28572	species_special	Crassostrea_gigas_species_EVM0048762.1	Crassostrea_gigas_species_EVM0024046.1
group3224	multi_ortholog	Bathymodiolus_platifrons_species_15333:Bpl_scaf_13236-4.21-mRNA-1	Lottia_gigantea_species_rna-XM_009066190.1	Lottia_gigantea_species_rna-XM_009046934.1	Crassostrea_virginica_species_rna-XM_022479682.1	Bathymodiolus_platifrons_species_7510:Bpl_scaf_65525-1.15-mRNA-1	Crassostrea_gigas_species_EVM0032959.1	Corbicula_fluminea_species_EVM0009204.1	Crassostrea_gigas_species_EVM0032800.1	Corbicula_fluminea_species_EVM0038648.1
group55357	species_special	Crassostrea_gigas_species_EVM0016447.1
group7451	multi_ortholog	Bathymodiolus_platifrons_species_539:Bpl_scaf_1989-12.16-mRNA-1	Corbicula_fluminea_species_EVM0037400.1	Crassostrea_gigas_species_EVM0049376.1	Lottia_gigantea_species_rna-XM_009052944.1	Crassostrea_gigas_species_EVM0050109.1	Crassostrea_virginica_species_rna-XM_022465113.1
group35082	species_special	Bathymodiolus_platifrons_species_3584:Bpl_scaf_33564-0.5-mRNA-1
group27338	other_ortholog	Crassostrea_gigas_species_EVM0008475.1	Crassostrea_virginica_species_rna-XM_022477519.1
group24311	species_special	Corbicula_fluminea_species_EVM0031668.1	Corbicula_fluminea_species_EVM0031671.1
group21486	species_special	Crassostrea_virginica_species_rna-XM_022483292.1	Crassostrea_virginica_species_rna-XM_022481393.1	Crassostrea_virginica_species_rna-XM_022481394.1
group30878	species_special	Lottia_gigantea_species_rna-XM_009053879.1	Lottia_gigantea_species_rna-XM_009058374.1
group11112	species_special	Corbicula_fluminea_species_EVM0005698.1	Corbicula_fluminea_species_EVM0029961.1	Corbicula_fluminea_species_EVM0034887.1	Corbicula_fluminea_species_EVM0003270.1	Corbicula_fluminea_species_EVM0036327.1
group24668	species_special	Corbicula_fluminea_species_EVM0037967.1	Corbicula_fluminea_species_EVM0037126.1
group66874	species_special	Lottia_gigantea_species_rna-XM_009058475.1
group8184	other_ortholog	Bathymodiolus_platifrons_species_3619:Bpl_scaf_45392-3.14-mRNA-1	Corbicula_fluminea_species_EVM0003853.1	Crassostrea_gigas_species_EVM0031173.1	Crassostrea_gigas_species_EVM0016768.1	Crassostrea_virginica_species_rna-XM_022466797.1	Crassostrea_virginica_species_rna-XM_022471615.1
group52477	species_special	Corbicula_fluminea_species_EVM0025304.1
group7907	species_special	Bathymodiolus_platifrons_species_12160:Bpl_scaf_34481-0.0-mRNA-1	Bathymodiolus_platifrons_species_9821:Bpl_scaf_46053-3.9-mRNA-1	Bathymodiolus_platifrons_species_5225:Bpl_scaf_62822-0.20-mRNA-1	Bathymodiolus_platifrons_species_17940:Bpl_scaf_59503-0.0-mRNA-1	Bathymodiolus_platifrons_species_5752:Bpl_scaf_488-0.0-mRNA-1	Bathymodiolus_platifrons_species_14689:Bpl_scaf_5766-0.1-mRNA-1
group64764	species_special	Lottia_gigantea_species_rna-XM_009053510.1
group26484	species_special	Crassostrea_gigas_species_EVM0016924.1	Crassostrea_gigas_species_EVM0024744.2
group37031	species_special	Bathymodiolus_platifrons_species_17684:Bpl_scaf_45229-2.5-mRNA-1
group46031	species_special	Corbicula_fluminea_species_EVM0032808.1
group57232	species_special	Crassostrea_gigas_species_EVM0049771.1
group55182	species_special	Crassostrea_gigas_species_EVM0034544.1
group6336	multi_ortholog	Bathymodiolus_platifrons_species_5402:Bpl_scaf_6719-0.10-mRNA-1	Crassostrea_virginica_species_rna-XM_022472874.1	Crassostrea_virginica_species_rna-XM_022472875.1	Crassostrea_gigas_species_EVM0029421.1	Crassostrea_gigas_species_EVM0003316.1	Corbicula_fluminea_species_EVM0030864.1	Lottia_gigantea_species_rna-XM_009063043.1
group5597	multi_ortholog	Bathymodiolus_platifrons_species_11321:Bpl_scaf_30056-0.4-mRNA-1	Crassostrea_gigas_species_EVM0020544.1	Crassostrea_gigas_species_EVM0048167.1	Corbicula_fluminea_species_EVM0003477.1	Crassostrea_virginica_species_rna-XM_022470588.1	Corbicula_fluminea_species_EVM0003658.1	Lottia_gigantea_species_rna-XM_009061609.1
group35507	species_special	Bathymodiolus_platifrons_species_16350:Bpl_scaf_35997-1.10-mRNA-1
group25239	species_special	Corbicula_fluminea_species_EVM0008569.1	Corbicula_fluminea_species_EVM0030792.1
group35863	species_special	Bathymodiolus_platifrons_species_17795:Bpl_scaf_38266-1.2-mRNA-1
group54457	species_special	Crassostrea_gigas_species_EVM0007686.1
group63602	species_special	Lottia_gigantea_species_rna-XM_009050819.1
group47367	species_special	Corbicula_fluminea_species_EVM0008531.1
group44576	species_special	Corbicula_fluminea_species_EVM0010398.1
group67101	species_special	Lottia_gigantea_species_rna-XM_009059087.1
group38768	species_special	Bathymodiolus_platifrons_species_4678:Bpl_scaf_54922-1.16-mRNA-1
group38495	species_special	Bathymodiolus_platifrons_species_8953:Bpl_scaf_53786-2.3-mRNA-1
group18564	species_special	Crassostrea_gigas_species_EVM0005470.1	Crassostrea_gigas_species_EVM0056867.1	Crassostrea_gigas_species_EVM0037379.1
group1244	other_ortholog	Crassostrea_virginica_species_rna-XM_022471285.1	Crassostrea_virginica_species_rna-XM_022471664.1	Crassostrea_gigas_species_EVM0021525.1	Crassostrea_gigas_species_EVM0021686.1	Corbicula_fluminea_species_EVM0012682.1	Corbicula_fluminea_species_EVM0017875.1	Bathymodiolus_platifrons_species_14526:Bpl_scaf_5728-0.5-mRNA-1	Corbicula_fluminea_species_EVM0001548.1	Corbicula_fluminea_species_EVM0029613.1	Corbicula_fluminea_species_EVM0028999.1	Corbicula_fluminea_species_EVM0015914.1	Corbicula_fluminea_species_EVM0013484.1	Corbicula_fluminea_species_EVM0008020.1	Corbicula_fluminea_species_EVM0016429.1	Crassostrea_gigas_species_EVM0004855.1
group37117	species_special	Bathymodiolus_platifrons_species_16079:Bpl_scaf_45936-1.16-mRNA-1
group15424	other_ortholog	Crassostrea_gigas_species_EVM0031665.1	Crassostrea_gigas_species_EVM0022667.1	Crassostrea_virginica_species_rna-XM_022468419.1	Crassostrea_virginica_species_rna-XM_022468639.1
group44843	species_special	Corbicula_fluminea_species_EVM0037198.1
group61512	species_special	Lottia_gigantea_species_rna-XM_009046041.1
group668	other_ortholog	Bathymodiolus_platifrons_species_8548:Bpl_scaf_31289-3.7-mRNA-1	Crassostrea_virginica_species_rna-XM_022469055.1	Crassostrea_virginica_species_rna-XM_022469074.1	Crassostrea_virginica_species_rna-XM_022455865.1	Crassostrea_virginica_species_rna-XM_022455857.1	Crassostrea_gigas_species_EVM0028156.1	Crassostrea_gigas_species_EVM0018860.1	Crassostrea_virginica_species_rna-XM_022469083.1	Crassostrea_virginica_species_rna-XM_022469117.1	Crassostrea_virginica_species_rna-XM_022469135.1	Crassostrea_virginica_species_rna-XM_022469047.1	Crassostrea_virginica_species_rna-XM_022469066.1	Crassostrea_virginica_species_rna-XM_022469091.1	Crassostrea_virginica_species_rna-XM_022469099.1	Crassostrea_virginica_species_rna-XM_022469109.1	Crassostrea_virginica_species_rna-XM_022469124.1	Crassostrea_virginica_species_rna-XM_022478091.1	Crassostrea_gigas_species_EVM0024774.1	Bathymodiolus_platifrons_species_12705:Bpl_scaf_8157-1.6-mRNA-1	Crassostrea_gigas_species_EVM0056137.1
group45179	species_special	Corbicula_fluminea_species_EVM0036397.1
group53753	species_special	Crassostrea_gigas_species_EVM0004353.1
group9824	other_ortholog	Crassostrea_gigas_species_EVM0015787.1	Crassostrea_gigas_species_EVM0051362.1	Crassostrea_virginica_species_rna-XM_022448307.1	Crassostrea_virginica_species_rna-XM_022448306.1	Crassostrea_virginica_species_rna-XM_022448310.1	Crassostrea_virginica_species_rna-XM_022448309.1
group16581	species_special	Bathymodiolus_platifrons_species_16381:Bpl_scaf_17187-8.27-mRNA-1	Bathymodiolus_platifrons_species_9392:Bpl_scaf_3882-0.5-mRNA-1	Bathymodiolus_platifrons_species_16713:Bpl_scaf_35989-0.3-mRNA-1
group20098	species_special	Crassostrea_gigas_species_EVM0000947.1	Crassostrea_gigas_species_EVM0022378.1	Crassostrea_gigas_species_EVM0024695.1
group47683	species_special	Corbicula_fluminea_species_EVM0001648.1
group1712	other_ortholog	Bathymodiolus_platifrons_species_15221:Bpl_scaf_57711-4.6-mRNA-1	Crassostrea_gigas_species_EVM0022309.1	Crassostrea_gigas_species_EVM0039076.1	Crassostrea_virginica_species_rna-XM_022437632.1	Crassostrea_virginica_species_rna-XM_022437633.1	Crassostrea_virginica_species_rna-XM_022437635.1	Crassostrea_virginica_species_rna-XM_022437636.1	Crassostrea_virginica_species_rna-XM_022437631.1	Crassostrea_virginica_species_rna-XM_022438092.1	Crassostrea_virginica_species_rna-XM_022438093.1	Crassostrea_virginica_species_rna-XM_022438094.1	Corbicula_fluminea_species_EVM0000282.1	Corbicula_fluminea_species_EVM0026523.1
group43379	species_special	Corbicula_fluminea_species_EVM0004704.1
group50118	species_special	Corbicula_fluminea_species_EVM0036400.1
group28947	species_special	Crassostrea_gigas_species_EVM0056278.1	Crassostrea_gigas_species_EVM0019640.1
group56915	species_special	Crassostrea_gigas_species_EVM0024874.1
group42877	species_special	Corbicula_fluminea_species_EVM0007136.1
group1669	multi_ortholog	Bathymodiolus_platifrons_species_12653:Bpl_scaf_4115-1.16-mRNA-1	Crassostrea_virginica_species_rna-XM_022451481.1	Crassostrea_gigas_species_EVM0040912.1	Crassostrea_virginica_species_rna-XM_022451477.1	Crassostrea_virginica_species_rna-XM_022451482.1	Crassostrea_virginica_species_rna-XM_022451479.1	Crassostrea_virginica_species_rna-XM_022451478.1	Crassostrea_virginica_species_rna-XM_022451476.1	Crassostrea_virginica_species_rna-XM_022451475.1	Crassostrea_virginica_species_rna-XM_022451480.1	Corbicula_fluminea_species_EVM0019233.1	Crassostrea_gigas_species_EVM0008681.2	Lottia_gigantea_species_rna-XM_009061246.1
group57046	species_special	Crassostrea_gigas_species_EVM0005612.1
group28256	species_special	Crassostrea_gigas_species_EVM0032814.1	Crassostrea_gigas_species_EVM0027988.1
group3308	multi_ortholog	Bathymodiolus_platifrons_species_5239:Bpl_scaf_23288-4.5-mRNA-1	Lottia_gigantea_species_rna-XM_009051648.1	Bathymodiolus_platifrons_species_4905:Bpl_scaf_49537-9.24-mRNA-1	Crassostrea_virginica_species_rna-XM_022490056.1	Crassostrea_virginica_species_rna-XM_022489538.1	Corbicula_fluminea_species_EVM0007628.1	Crassostrea_gigas_species_EVM0009676.1	Lottia_gigantea_species_rna-XM_009048521.1	Crassostrea_gigas_species_EVM0039670.1
group30575	species_special	Crassostrea_virginica_species_rna-XM_022449636.1	Crassostrea_virginica_species_rna-XM_022449637.1
group16671	other_ortholog	Bathymodiolus_platifrons_species_16850:Bpl_scaf_20847-4.15-mRNA-1	Crassostrea_gigas_species_EVM0055033.1	Crassostrea_virginica_species_rna-XM_022438342.1
group38832	species_special	Bathymodiolus_platifrons_species_12080:Bpl_scaf_55215-0.5-mRNA-1
group56374	species_special	Crassostrea_gigas_species_EVM0023442.1
group69600	species_special	Lottia_gigantea_species_rna-XM_009064984.1
group52139	species_special	Corbicula_fluminea_species_EVM0031310.1
group14341	species_special	Crassostrea_virginica_species_rna-XM_022456013.1	Crassostrea_virginica_species_rna-XM_022456009.1	Crassostrea_virginica_species_rna-XM_022459459.1	Crassostrea_virginica_species_rna-XM_022459469.1
group46372	species_special	Corbicula_fluminea_species_EVM0030474.1
group68422	species_special	Lottia_gigantea_species_rna-XM_009062194.1
group6800	other_ortholog	Crassostrea_virginica_species_rna-XM_022433486.1	Crassostrea_virginica_species_rna-XM_022433678.1	Crassostrea_gigas_species_EVM0037777.1	Crassostrea_gigas_species_EVM0000678.1	Crassostrea_gigas_species_EVM0010656.1	Crassostrea_gigas_species_EVM0034478.1	Crassostrea_gigas_species_EVM0005332.1
group63291	species_special	Lottia_gigantea_species_rna-XM_009050082.1
group39317	species_special	Bathymodiolus_platifrons_species_1230:Bpl_scaf_57248-5.41-mRNA-1
group54304	species_special	Crassostrea_gigas_species_EVM0053164.1
group46800	species_special	Corbicula_fluminea_species_EVM0038219.1
group3469	other_ortholog	Bathymodiolus_platifrons_species_4219:Bpl_scaf_45908-3.1-mRNA-1	Crassostrea_gigas_species_EVM0051342.1	Crassostrea_virginica_species_rna-XM_022466082.1	Crassostrea_virginica_species_rna-XM_022466081.1	Crassostrea_virginica_species_rna-XM_022468855.1	Crassostrea_virginica_species_rna-XM_022468854.1	Crassostrea_gigas_species_EVM0034762.1	Corbicula_fluminea_species_EVM0009491.1	Corbicula_fluminea_species_EVM0026168.1
group11526	species_special	Corbicula_fluminea_species_EVM0024163.1	Corbicula_fluminea_species_EVM0031451.1	Corbicula_fluminea_species_EVM0025618.1	Corbicula_fluminea_species_EVM0002729.1	Corbicula_fluminea_species_EVM0015788.1
group27829	species_special	Crassostrea_gigas_species_EVM0032060.1	Crassostrea_gigas_species_EVM0014036.1
group43023	species_special	Corbicula_fluminea_species_EVM0013540.1
group4999	other_ortholog	Crassostrea_gigas_species_EVM0014816.1	Crassostrea_gigas_species_EVM0048590.1	Crassostrea_virginica_species_rna-XM_022470401.1	Crassostrea_virginica_species_rna-XM_022470402.1	Crassostrea_virginica_species_rna-XM_022469948.1	Crassostrea_virginica_species_rna-XM_022469949.1	Crassostrea_virginica_species_rna-XM_022469950.1	Crassostrea_virginica_species_rna-XM_022469952.1
group14980	species_special	Crassostrea_gigas_species_EVM0046962.1	Crassostrea_gigas_species_EVM0022228.1	Crassostrea_gigas_species_EVM0033219.1	Crassostrea_gigas_species_EVM0022248.1
group18829	other_ortholog	Crassostrea_gigas_species_EVM0004466.1	Crassostrea_gigas_species_EVM0035643.1	Crassostrea_virginica_species_rna-XM_022478740.1
group68524	species_special	Lottia_gigantea_species_rna-XM_009062455.1
group38873	species_special	Bathymodiolus_platifrons_species_10812:Bpl_scaf_5538-15.6-mRNA-1
group36131	species_special	Bathymodiolus_platifrons_species_15226:Bpl_scaf_40374-0.35-mRNA-1
group11687	other_ortholog	Crassostrea_gigas_species_EVM0048679.1	Crassostrea_gigas_species_EVM0007329.1	Crassostrea_virginica_species_rna-XM_022438475.1	Crassostrea_virginica_species_rna-XM_022443383.1	Crassostrea_virginica_species_rna-XM_022438481.1
group28237	species_special	Crassostrea_gigas_species_EVM0037900.1	Crassostrea_gigas_species_EVM0040242.1
group29163	species_special	Crassostrea_gigas_species_EVM0023656.2	Crassostrea_gigas_species_EVM0001840.1
group12965	other_ortholog	Bathymodiolus_platifrons_species_4436:Bpl_scaf_21348-1.14-mRNA-1	Crassostrea_gigas_species_EVM0002725.1	Corbicula_fluminea_species_EVM0014960.1	Corbicula_fluminea_species_EVM0034010.1
group60124	species_special	Crassostrea_virginica_species_rna-XM_022431231.1
group7312	multi_ortholog	Bathymodiolus_platifrons_species_18076:Bpl_scaf_15951-9.6-mRNA-1	Lottia_gigantea_species_rna-XM_009049092.1	Corbicula_fluminea_species_EVM0005531.1	Crassostrea_gigas_species_EVM0031298.1	Crassostrea_virginica_species_rna-XM_022467503.1	Crassostrea_gigas_species_EVM0020300.1
group16730	species_special	Bathymodiolus_platifrons_species_3950:Bpl_scaf_23203-4.29-mRNA-1	Bathymodiolus_platifrons_species_13629:Bpl_scaf_910-0.10-mRNA-1	Bathymodiolus_platifrons_species_18492:Bpl_scaf_43288-1.22-mRNA-1
group56504	species_special	Crassostrea_gigas_species_EVM0000185.1
group18215	other_ortholog	Crassostrea_gigas_species_EVM0033703.1	Crassostrea_gigas_species_EVM0000551.1	Crassostrea_virginica_species_rna-XM_022436913.1
group66342	species_special	Lottia_gigantea_species_rna-XM_009057191.1
group54873	species_special	Crassostrea_gigas_species_EVM0012806.1
group44552	species_special	Corbicula_fluminea_species_EVM0015457.1
group4439	multi_ortholog	Bathymodiolus_platifrons_species_14610:Bpl_scaf_48789-4.0-mRNA-1	Crassostrea_virginica_species_rna-XM_022470889.1	Crassostrea_virginica_species_rna-XM_022470888.1	Crassostrea_virginica_species_rna-XM_022470890.1	Crassostrea_gigas_species_EVM0054413.1	Lottia_gigantea_species_rna-XM_009046809.1	Crassostrea_gigas_species_EVM0049668.1	Corbicula_fluminea_species_EVM0005913.1
group69083	species_special	Lottia_gigantea_species_rna-XM_009063699.1
group17269	other_ortholog	Bathymodiolus_platifrons_species_6386:Bpl_scaf_63657-0.22-mRNA-1	Corbicula_fluminea_species_EVM0016990.1	Lottia_gigantea_species_rna-XM_009053762.1
group39457	species_special	Bathymodiolus_platifrons_species_10062:Bpl_scaf_58140-2.2-mRNA-1
group69082	species_special	Lottia_gigantea_species_rna-XM_009063697.1
group40038	species_special	Bathymodiolus_platifrons_species_16641:Bpl_scaf_61387-2.36-mRNA-1
group11748	species_special	Crassostrea_gigas_species_EVM0035384.1	Crassostrea_gigas_species_EVM0004926.1	Crassostrea_gigas_species_EVM0028538.1	Crassostrea_gigas_species_EVM0027305.1	Crassostrea_gigas_species_EVM0058535.1
group36868	species_special	Bathymodiolus_platifrons_species_2916:Bpl_scaf_44428-1.5-mRNA-1
group7976	multi_ortholog	Bathymodiolus_platifrons_species_5325:Bpl_scaf_37612-0.9-mRNA-1	Crassostrea_gigas_species_EVM0014247.1	Crassostrea_gigas_species_EVM0005442.1	Crassostrea_virginica_species_rna-XM_022483039.1	Corbicula_fluminea_species_EVM0017494.1	Lottia_gigantea_species_rna-XM_009054425.1
group22973	other_ortholog	Bathymodiolus_platifrons_species_8071:Bpl_scaf_37323-0.3-mRNA-1	Lottia_gigantea_species_rna-XM_009046248.1
group48868	species_special	Corbicula_fluminea_species_EVM0013214.1
group39799	species_special	Bathymodiolus_platifrons_species_10530:Bpl_scaf_60194-1.29-mRNA-1
group69123	species_special	Lottia_gigantea_species_rna-XM_009063811.1
group53697	species_special	Crassostrea_gigas_species_EVM0053493.1
group15478	other_ortholog	Crassostrea_gigas_species_EVM0058210.1	Crassostrea_gigas_species_EVM0002313.1	Crassostrea_virginica_species_rna-XM_022456384.1	Crassostrea_virginica_species_rna-XM_022457129.1
group50442	species_special	Corbicula_fluminea_species_EVM0019945.1
group43660	species_special	Corbicula_fluminea_species_EVM0014069.1
group53809	species_special	Crassostrea_gigas_species_EVM0057831.1
group50279	species_special	Corbicula_fluminea_species_EVM0009992.1
group63846	species_special	Lottia_gigantea_species_rna-XM_009051349.1
group1334	other_ortholog	Crassostrea_gigas_species_EVM0044575.1	Crassostrea_virginica_species_rna-XM_022439641.1	Crassostrea_virginica_species_rna-XM_022435080.1	Crassostrea_gigas_species_EVM0039933.1	Crassostrea_virginica_species_rna-XM_022438634.1	Crassostrea_virginica_species_rna-XM_022435074.1	Crassostrea_virginica_species_rna-XM_022435064.1	Crassostrea_virginica_species_rna-XM_022437209.1	Crassostrea_virginica_species_rna-XM_022450675.1	Crassostrea_virginica_species_rna-XM_022438633.1	Crassostrea_virginica_species_rna-XM_022439640.1	Crassostrea_virginica_species_rna-XM_022435075.1	Crassostrea_virginica_species_rna-XM_022435065.1	Crassostrea_virginica_species_rna-XM_022435076.1	Crassostrea_virginica_species_rna-XM_022435066.1
group13475	other_ortholog	Bathymodiolus_platifrons_species_7470:Bpl_scaf_62564-0.13-mRNA-1	Corbicula_fluminea_species_EVM0038256.1	Crassostrea_gigas_species_EVM0053473.1	Crassostrea_gigas_species_EVM0009031.1
group17165	species_special	Bathymodiolus_platifrons_species_6600:Bpl_scaf_52096-0.1-mRNA-1	Bathymodiolus_platifrons_species_12447:Bpl_scaf_54715-0.3-mRNA-1	Bathymodiolus_platifrons_species_4517:Bpl_scaf_63539-1.0-mRNA-1
group55720	species_special	Crassostrea_gigas_species_EVM0009044.1
group69535	species_special	Lottia_gigantea_species_rna-XM_009064826.1
group43312	species_special	Corbicula_fluminea_species_EVM0003466.1
group62277	species_special	Lottia_gigantea_species_rna-XM_009047877.1
group33308	species_special	Bathymodiolus_platifrons_species_5293:Bpl_scaf_23-3.20-mRNA-1
group45430	species_special	Corbicula_fluminea_species_EVM0001256.1
group37506	species_special	Bathymodiolus_platifrons_species_13276:Bpl_scaf_48255-0.3-mRNA-1
group4913	other_ortholog	Crassostrea_gigas_species_EVM0019046.1	Crassostrea_gigas_species_EVM0022526.1	Crassostrea_virginica_species_rna-XM_022486470.1	Crassostrea_virginica_species_rna-XM_022486472.1	Crassostrea_virginica_species_rna-XM_022486474.1	Crassostrea_virginica_species_rna-XM_022486475.1	Crassostrea_virginica_species_rna-XM_022486473.1	Crassostrea_virginica_species_rna-XM_022486471.1
group13195	other_ortholog	Bathymodiolus_platifrons_species_1078:Bpl_scaf_35206-6.28-mRNA-1	Crassostrea_virginica_species_rna-XM_022467078.1	Crassostrea_gigas_species_EVM0044352.1	Crassostrea_gigas_species_EVM0008719.1
group10896	other_ortholog	Bathymodiolus_platifrons_species_1623:Bpl_scaf_57425-0.7-mRNA-1	Crassostrea_gigas_species_EVM0056486.1	Crassostrea_gigas_species_EVM0016049.1	Crassostrea_virginica_species_rna-XM_022447261.1	Crassostrea_virginica_species_rna-XM_022435305.1
group28806	species_special	Crassostrea_gigas_species_EVM0047394.1	Crassostrea_gigas_species_EVM0024483.1
group28320	species_special	Crassostrea_gigas_species_EVM0049324.1	Crassostrea_gigas_species_EVM0054558.1
group51867	species_special	Corbicula_fluminea_species_EVM0018068.1
group42638	species_special	Corbicula_fluminea_species_EVM0035405.1
group49492	species_special	Corbicula_fluminea_species_EVM0029074.1
group70962	species_special	Lottia_gigantea_species_rna-XM_009068284.1
group8552	multi_ortholog	Bathymodiolus_platifrons_species_1292:Bpl_scaf_56926-0.13-mRNA-1	Crassostrea_gigas_species_EVM0015329.1	Crassostrea_virginica_species_rna-XM_022440598.1	Crassostrea_gigas_species_EVM0055366.1	Lottia_gigantea_species_rna-XM_009066670.1	Corbicula_fluminea_species_EVM0006354.1
group48447	species_special	Corbicula_fluminea_species_EVM0035422.1
group22465	species_special	Bathymodiolus_platifrons_species_5570:Bpl_scaf_22882-0.3-mRNA-1	Bathymodiolus_platifrons_species_1273:Bpl_scaf_32359-0.0-mRNA-1
group40784	species_special	Bathymodiolus_platifrons_species_9879:Bpl_scaf_65171-1.2-mRNA-1
group15378	other_ortholog	Crassostrea_gigas_species_EVM0030414.1	Crassostrea_gigas_species_EVM0028891.1	Crassostrea_virginica_species_rna-XM_022469032.1	Crassostrea_virginica_species_rna-XM_022465736.1
group7346	multi_ortholog	Bathymodiolus_platifrons_species_6813:Bpl_scaf_16621-7.2-mRNA-1	Lottia_gigantea_species_rna-XM_009045597.1	Crassostrea_gigas_species_EVM0028904.1	Crassostrea_virginica_species_rna-XM_022463767.1	Corbicula_fluminea_species_EVM0034413.1	Crassostrea_gigas_species_EVM0012558.1
group50214	species_special	Corbicula_fluminea_species_EVM0011109.1
group16109	species_special	Crassostrea_virginica_species_rna-XM_022476177.1	Crassostrea_virginica_species_rna-XM_022434654.1	Crassostrea_virginica_species_rna-XM_022482885.1	Crassostrea_virginica_species_rna-XM_022443075.1
group52128	species_special	Corbicula_fluminea_species_EVM0037923.1
group63509	species_special	Lottia_gigantea_species_rna-XM_009050602.1
group2083	other_ortholog	Corbicula_fluminea_species_EVM0015824.1	Crassostrea_gigas_species_EVM0026071.1	Crassostrea_virginica_species_rna-XM_022465541.1	Crassostrea_virginica_species_rna-XM_022465544.1	Crassostrea_virginica_species_rna-XM_022465543.1	Crassostrea_virginica_species_rna-XM_022467412.1	Crassostrea_virginica_species_rna-XM_022467414.1	Crassostrea_virginica_species_rna-XM_022467415.1	Crassostrea_virginica_species_rna-XM_022467416.1	Crassostrea_virginica_species_rna-XM_022465545.1	Crassostrea_virginica_species_rna-XM_022467417.1	Crassostrea_gigas_species_EVM0054955.1
group24512	species_special	Corbicula_fluminea_species_EVM0018348.1	Corbicula_fluminea_species_EVM0009040.1
group14081	species_special	Corbicula_fluminea_species_EVM0032004.1	Corbicula_fluminea_species_EVM0036690.1	Corbicula_fluminea_species_EVM0012448.1	Corbicula_fluminea_species_EVM0016480.1
group54417	species_special	Crassostrea_gigas_species_EVM0024480.1
group44164	species_special	Corbicula_fluminea_species_EVM0014649.1
group36983	species_special	Bathymodiolus_platifrons_species_15001:Bpl_scaf_45115-0.15-mRNA-1
group56775	species_special	Crassostrea_gigas_species_EVM0020979.1
group50662	species_special	Corbicula_fluminea_species_EVM0027343.1
group8265	other_ortholog	Crassostrea_gigas_species_EVM0022547.1	Crassostrea_gigas_species_EVM0029994.1	Crassostrea_gigas_species_EVM0018012.1	Crassostrea_virginica_species_rna-XM_022453603.1	Crassostrea_virginica_species_rna-XM_022454253.1	Crassostrea_gigas_species_EVM0052358.1
group48281	species_special	Corbicula_fluminea_species_EVM0011381.3
group39359	species_special	Bathymodiolus_platifrons_species_15552:Bpl_scaf_57479-0.0-mRNA-1
group37201	species_special	Bathymodiolus_platifrons_species_18402:Bpl_scaf_46488-6.24-mRNA-1
group32938	species_special	Bathymodiolus_platifrons_species_15283:Bpl_scaf_20513-0.49-mRNA-1
group42151	species_special	Corbicula_fluminea_species_EVM0031538.1
group22569	other_ortholog	Bathymodiolus_platifrons_species_8422:Bpl_scaf_24996-4.9-mRNA-1	Lottia_gigantea_species_rna-XM_009053070.1
group54657	species_special	Crassostrea_gigas_species_EVM0000898.1
group18112	species_special	Corbicula_fluminea_species_EVM0019465.1	Corbicula_fluminea_species_EVM0006730.1	Corbicula_fluminea_species_EVM0005385.1
group34648	species_special	Bathymodiolus_platifrons_species_18373:Bpl_scaf_30485-1.5-mRNA-1
group67731	species_special	Lottia_gigantea_species_rna-XM_009060564.1
group2625	other_ortholog	Crassostrea_gigas_species_EVM0024026.1	Crassostrea_gigas_species_EVM0034419.1	Crassostrea_virginica_species_rna-XM_022446775.1	Crassostrea_virginica_species_rna-XM_022446777.1	Crassostrea_virginica_species_rna-XM_022446774.1	Crassostrea_virginica_species_rna-XM_022440112.1	Crassostrea_virginica_species_rna-XM_022440113.1	Crassostrea_virginica_species_rna-XM_022440111.1	Crassostrea_virginica_species_rna-XM_022446061.1	Crassostrea_virginica_species_rna-XM_022446062.1	Crassostrea_virginica_species_rna-XM_022440738.1
group8769	other_ortholog	Bathymodiolus_platifrons_species_13695:Bpl_scaf_64904-6.8-mRNA-1	Crassostrea_gigas_species_EVM0013107.1	Crassostrea_gigas_species_EVM0002323.1	Crassostrea_virginica_species_rna-XM_022488543.1	Crassostrea_virginica_species_rna-XM_022488544.1	Crassostrea_virginica_species_rna-XM_022488545.1
group2201	other_ortholog	Crassostrea_gigas_species_EVM0043265.1	Crassostrea_gigas_species_EVM0002468.1	Crassostrea_virginica_species_rna-XM_022441465.1	Crassostrea_virginica_species_rna-XM_022441464.1	Crassostrea_virginica_species_rna-XM_022441466.1	Crassostrea_virginica_species_rna-XM_022441456.1	Crassostrea_virginica_species_rna-XM_022443687.1	Crassostrea_virginica_species_rna-XM_022441455.1	Crassostrea_virginica_species_rna-XM_022441467.1	Crassostrea_virginica_species_rna-XM_022440141.1	Crassostrea_virginica_species_rna-XM_022441457.1	Crassostrea_virginica_species_rna-XM_022443688.1
group66859	species_special	Lottia_gigantea_species_rna-XM_009058449.1
group57197	species_special	Crassostrea_gigas_species_EVM0016550.1
group8924	species_special	Corbicula_fluminea_species_EVM0008548.1	Corbicula_fluminea_species_EVM0012446.1	Corbicula_fluminea_species_EVM0005944.1	Corbicula_fluminea_species_EVM0015236.1	Corbicula_fluminea_species_EVM0028893.1	Corbicula_fluminea_species_EVM0015409.1
group41844	species_special	Corbicula_fluminea_species_EVM0034559.1
group60059	species_special	Crassostrea_virginica_species_rna-XM_022431766.1
group27570	species_special	Crassostrea_gigas_species_EVM0004939.1	Crassostrea_gigas_species_EVM0002667.1
group13547	species_special	Corbicula_fluminea_species_EVM0025678.1	Corbicula_fluminea_species_EVM0017134.1	Corbicula_fluminea_species_EVM0033433.1	Corbicula_fluminea_species_EVM0017321.1
group14227	species_special	Crassostrea_gigas_species_EVM0031451.1	Crassostrea_gigas_species_EVM0034230.1	Crassostrea_gigas_species_EVM0029319.1	Crassostrea_gigas_species_EVM0046638.1
group14800	other_ortholog	Crassostrea_gigas_species_EVM0009452.1	Crassostrea_gigas_species_EVM0011697.1	Crassostrea_virginica_species_rna-XM_022430967.1	Crassostrea_virginica_species_rna-XM_022430968.1
group53166	species_special	Corbicula_fluminea_species_EVM0015634.1
group36149	species_special	Bathymodiolus_platifrons_species_11527:Bpl_scaf_40426-0.2-mRNA-1
group9923	species_special	Crassostrea_virginica_species_rna-XM_022457438.1	Crassostrea_virginica_species_rna-XM_022457439.1	Crassostrea_virginica_species_rna-XM_022457440.1	Crassostrea_virginica_species_rna-XM_022457972.1	Crassostrea_virginica_species_rna-XM_022457970.1	Crassostrea_virginica_species_rna-XM_022457971.1
group64640	species_special	Lottia_gigantea_species_rna-XM_009053234.1
group42304	species_special	Corbicula_fluminea_species_EVM0031116.1
group16600	species_special	Bathymodiolus_platifrons_species_9844:Bpl_scaf_17888-3.14-mRNA-1	Bathymodiolus_platifrons_species_6089:Bpl_scaf_18163-0.4-mRNA-1	Bathymodiolus_platifrons_species_10055:Bpl_scaf_19764-0.2-mRNA-1
group63047	species_special	Lottia_gigantea_species_rna-XM_009049557.1
group9661	other_ortholog	Crassostrea_gigas_species_EVM0002281.1	Crassostrea_gigas_species_EVM0006038.1	Crassostrea_virginica_species_rna-XM_022489648.1	Crassostrea_virginica_species_rna-XM_022485864.1	Crassostrea_virginica_species_rna-XM_022489649.1	Crassostrea_virginica_species_rna-XM_022485865.1
group21359	species_special	Crassostrea_virginica_species_rna-XM_022464600.1	Crassostrea_virginica_species_rna-XM_022464598.1	Crassostrea_virginica_species_rna-XM_022464599.1
group49058	species_special	Corbicula_fluminea_species_EVM0004147.1
group15051	other_ortholog	Crassostrea_gigas_species_EVM0034690.1	Crassostrea_gigas_species_EVM0046598.1	Crassostrea_virginica_species_rna-XM_022486652.1	Crassostrea_virginica_species_rna-XM_022480109.1
group1269	multi_ortholog	Bathymodiolus_platifrons_species_6748:Bpl_scaf_49383-1.14-mRNA-1	Crassostrea_gigas_species_EVM0053253.1	Crassostrea_gigas_species_EVM0049829.1	Crassostrea_virginica_species_rna-XM_022451369.1	Crassostrea_virginica_species_rna-XM_022451373.1	Crassostrea_virginica_species_rna-XM_022451370.1	Crassostrea_virginica_species_rna-XM_022449792.1	Crassostrea_virginica_species_rna-XM_022449795.1	Crassostrea_virginica_species_rna-XM_022449793.1	Crassostrea_virginica_species_rna-XM_022451371.1	Crassostrea_virginica_species_rna-XM_022449794.1	Corbicula_fluminea_species_EVM0008572.1	Lottia_gigantea_species_rna-XM_009063089.1	Crassostrea_virginica_species_rna-XM_022451374.1	Crassostrea_virginica_species_rna-XM_022449797.1
group3718	other_ortholog	Crassostrea_gigas_species_EVM0039979.2	Crassostrea_gigas_species_EVM0001640.1	Crassostrea_virginica_species_rna-XM_022449705.1	Crassostrea_virginica_species_rna-XM_022449713.1	Crassostrea_virginica_species_rna-XM_022449723.1	Crassostrea_gigas_species_EVM0034519.1	Crassostrea_gigas_species_EVM0025819.1	Crassostrea_gigas_species_EVM0017367.1	Crassostrea_virginica_species_rna-XM_022467203.1
group245	other_ortholog	Bathymodiolus_platifrons_species_13932:Bpl_scaf_12374-10.32-mRNA-1	Bathymodiolus_platifrons_species_1892:Bpl_scaf_39524-0.1-mRNA-1	Bathymodiolus_platifrons_species_11762:Bpl_scaf_44296-5.10-mRNA-1	Bathymodiolus_platifrons_species_2497:Bpl_scaf_62452-0.19-mRNA-1	Bathymodiolus_platifrons_species_18516:Bpl_scaf_56804-1.6-mRNA-1	Bathymodiolus_platifrons_species_8705:Bpl_scaf_53568-0.1-mRNA-1	Bathymodiolus_platifrons_species_4293:Bpl_scaf_38703-10.36-mRNA-1	Bathymodiolus_platifrons_species_11935:Bpl_scaf_23613-0.0-mRNA-1	Crassostrea_virginica_species_rna-XM_022456883.1	Bathymodiolus_platifrons_species_456:Bpl_scaf_2382-0.5-mRNA-1	Bathymodiolus_platifrons_species_5713:Bpl_scaf_3488-0.21-mRNA-1	Bathymodiolus_platifrons_species_10831:Bpl_scaf_34981-0.10-mRNA-1	Bathymodiolus_platifrons_species_18775:Bpl_scaf_59494-0.14-mRNA-1	Bathymodiolus_platifrons_species_17698:Bpl_scaf_23676-5.22-mRNA-1	Bathymodiolus_platifrons_species_9930:Bpl_scaf_59873-0.11-mRNA-1	Bathymodiolus_platifrons_species_1258:Bpl_scaf_24335-1.15-mRNA-1	Bathymodiolus_platifrons_species_18652:Bpl_scaf_60908-4.10-mRNA-1	Bathymodiolus_platifrons_species_14882:Bpl_scaf_21087-0.4-mRNA-1	Bathymodiolus_platifrons_species_7020:Bpl_scaf_33847-0.0-mRNA-1	Bathymodiolus_platifrons_species_9132:Bpl_scaf_46583-0.9-mRNA-1	Bathymodiolus_platifrons_species_1105:Bpl_scaf_15594-0.19-mRNA-1	Bathymodiolus_platifrons_species_7370:Bpl_scaf_65520-8.20-mRNA-1	Bathymodiolus_platifrons_species_5242:Bpl_scaf_25987-2.15-mRNA-1	Bathymodiolus_platifrons_species_14060:Bpl_scaf_64988-0.14-mRNA-1	Bathymodiolus_platifrons_species_1104:Bpl_scaf_54829-0.9-mRNA-1	Bathymodiolus_platifrons_species_563:Bpl_scaf_60249-2.18-mRNA-1	Bathymodiolus_platifrons_species_3052:Bpl_scaf_29710-0.1-mRNA-1	Bathymodiolus_platifrons_species_10938:Bpl_scaf_21889-0.3-mRNA-1	Bathymodiolus_platifrons_species_16079:Bpl_scaf_45936-6.4-mRNA-1	Bathymodiolus_platifrons_species_17582:Bpl_scaf_22448-0.4-mRNA-1	Crassostrea_virginica_species_rna-XM_022454155.1
group51296	species_special	Corbicula_fluminea_species_EVM0002150.1
group6892	other_ortholog	Crassostrea_gigas_species_EVM0026475.1	Crassostrea_gigas_species_EVM0011655.1	Crassostrea_virginica_species_rna-XM_022468605.1	Crassostrea_virginica_species_rna-XM_022468604.1	Crassostrea_virginica_species_rna-XM_022468606.1	Crassostrea_virginica_species_rna-XM_022468607.1	Crassostrea_virginica_species_rna-XM_022468437.1
group14073	other_ortholog	Corbicula_fluminea_species_EVM0021575.1	Crassostrea_virginica_species_rna-XM_022475060.1	Crassostrea_virginica_species_rna-XM_022475061.1	Crassostrea_virginica_species_rna-XM_022475062.1
group59159	species_special	Crassostrea_virginica_species_rna-XM_022470486.1
group56926	species_special	Crassostrea_gigas_species_EVM0005746.1
group21934	species_special	Bathymodiolus_platifrons_species_17207:Bpl_scaf_11334-0.27-mRNA-1	Bathymodiolus_platifrons_species_5944:Bpl_scaf_18484-0.19-mRNA-1
group30839	species_special	Lottia_gigantea_species_rna-XM_009052233.1	Lottia_gigantea_species_rna-XM_009065520.1
group39996	species_special	Bathymodiolus_platifrons_species_18512:Bpl_scaf_61230-3.2-mRNA-1
group3034	other_ortholog	Crassostrea_gigas_species_EVM0004611.1	Crassostrea_gigas_species_EVM0028694.1	Crassostrea_gigas_species_EVM0019573.1	Crassostrea_gigas_species_EVM0036870.1	Crassostrea_virginica_species_rna-XM_022438210.1	Crassostrea_virginica_species_rna-XM_022438209.1	Crassostrea_virginica_species_rna-XM_022438207.1	Crassostrea_virginica_species_rna-XM_022438208.1	Crassostrea_virginica_species_rna-XM_022487020.1	Crassostrea_virginica_species_rna-XM_022443503.1
group26612	species_special	Crassostrea_gigas_species_EVM0030680.1	Crassostrea_gigas_species_EVM0031345.1
group38478	species_special	Bathymodiolus_platifrons_species_17978:Bpl_scaf_53686-0.1-mRNA-1
group55591	species_special	Crassostrea_gigas_species_EVM0049251.1
group937	species_special	Bathymodiolus_platifrons_species_8243:Bpl_scaf_50796-0.0-mRNA-1	Bathymodiolus_platifrons_species_18563:Bpl_scaf_65504-1.15-mRNA-1	Bathymodiolus_platifrons_species_14666:Bpl_scaf_13817-2.3-mRNA-1	Bathymodiolus_platifrons_species_5270:Bpl_scaf_43088-1.10-mRNA-1	Bathymodiolus_platifrons_species_15625:Bpl_scaf_45888-1.5-mRNA-1	Bathymodiolus_platifrons_species_13987:Bpl_scaf_19931-2.6-mRNA-1	Bathymodiolus_platifrons_species_18093:Bpl_scaf_30792-0.18-mRNA-1	Bathymodiolus_platifrons_species_17776:Bpl_scaf_64954-1.6-mRNA-1	Bathymodiolus_platifrons_species_17776:Bpl_scaf_64954-1.4-mRNA-1	Bathymodiolus_platifrons_species_18093:Bpl_scaf_30792-0.56-mRNA-1	Bathymodiolus_platifrons_species_3998:Bpl_scaf_58640-0.39-mRNA-1	Bathymodiolus_platifrons_species_17776:Bpl_scaf_64954-1.5-mRNA-1	Bathymodiolus_platifrons_species_11408:Bpl_scaf_49470-1.3-mRNA-1	Bathymodiolus_platifrons_species_18093:Bpl_scaf_30792-0.52-mRNA-1	Bathymodiolus_platifrons_species_18093:Bpl_scaf_30792-0.16-mRNA-1	Bathymodiolus_platifrons_species_5775:Bpl_scaf_50990-0.2-mRNA-1	Bathymodiolus_platifrons_species_4115:Bpl_scaf_40704-4.5-mRNA-1
group56763	species_special	Crassostrea_gigas_species_EVM0054788.1
group44924	species_special	Corbicula_fluminea_species_EVM0024599.1
group22409	species_special	Bathymodiolus_platifrons_species_2192:Bpl_scaf_2146-0.3-mRNA-1	Bathymodiolus_platifrons_species_10397:Bpl_scaf_8797-0.3-mRNA-1
group70353	species_special	Lottia_gigantea_species_rna-XM_009066887.1
group8293	multi_ortholog	Bathymodiolus_platifrons_species_10581:Bpl_scaf_4947-1.5-mRNA-1	Lottia_gigantea_species_rna-XM_009063538.1	Crassostrea_virginica_species_rna-XM_022472956.1	Crassostrea_gigas_species_EVM0053430.1	Crassostrea_gigas_species_EVM0051548.1	Corbicula_fluminea_species_EVM0019143.1
group38214	species_special	Bathymodiolus_platifrons_species_2536:Bpl_scaf_52351-0.0-mRNA-1
group42735	species_special	Corbicula_fluminea_species_EVM0001723.1
group40385	species_special	Bathymodiolus_platifrons_species_18145:Bpl_scaf_63107-3.30-mRNA-1
group54545	species_special	Crassostrea_gigas_species_EVM0004891.1
group5243	other_ortholog	Crassostrea_virginica_species_rna-XM_022435681.1	Crassostrea_virginica_species_rna-XM_022435682.1	Crassostrea_gigas_species_EVM0048574.1	Crassostrea_gigas_species_EVM0009944.1	Crassostrea_gigas_species_EVM0016952.1	Crassostrea_gigas_species_EVM0003134.1	Crassostrea_virginica_species_rna-XM_022443289.1
group29772	species_special	Crassostrea_virginica_species_rna-XM_022448106.1	Crassostrea_virginica_species_rna-XM_022448114.1
group55542	species_special	Crassostrea_gigas_species_EVM0054653.1
group38381	species_special	Bathymodiolus_platifrons_species_9565:Bpl_scaf_53185-8.6-mRNA-1
group59404	species_special	Crassostrea_virginica_species_rna-XM_022473279.1
group50114	species_special	Corbicula_fluminea_species_EVM0021824.1
group27748	other_ortholog	Crassostrea_gigas_species_EVM0029194.1	Crassostrea_virginica_species_rna-XM_022439363.1
group62973	species_special	Lottia_gigantea_species_rna-XM_009049392.1
group5075	other_ortholog	Crassostrea_gigas_species_EVM0034596.2	Crassostrea_gigas_species_EVM0022452.1	Crassostrea_virginica_species_rna-XM_022462392.1	Crassostrea_virginica_species_rna-XM_022462391.1	Crassostrea_virginica_species_rna-XM_022462393.1	Crassostrea_virginica_species_rna-XM_022463044.1	Crassostrea_virginica_species_rna-XM_022463043.1	Crassostrea_virginica_species_rna-XM_022463045.1
group17424	species_special	Corbicula_fluminea_species_EVM0004936.1	Corbicula_fluminea_species_EVM0002724.1	Corbicula_fluminea_species_EVM0034003.1
group43253	species_special	Corbicula_fluminea_species_EVM0038651.1
group10583	other_ortholog	Bathymodiolus_platifrons_species_16498:Bpl_scaf_3805-4.12-mRNA-1	Crassostrea_gigas_species_EVM0038885.1	Crassostrea_gigas_species_EVM0003765.1	Crassostrea_virginica_species_rna-XM_022479159.1	Crassostrea_virginica_species_rna-XM_022473273.1
group35915	species_special	Bathymodiolus_platifrons_species_15542:Bpl_scaf_38338-7.8-mRNA-1
group68181	species_special	Lottia_gigantea_species_rna-XM_009061713.1
group905	other_ortholog	Crassostrea_gigas_species_EVM0008634.1	Crassostrea_gigas_species_EVM0017842.2	Crassostrea_virginica_species_rna-XM_022431694.1	Crassostrea_virginica_species_rna-XM_022431570.1	Crassostrea_virginica_species_rna-XM_022431569.1	Crassostrea_virginica_species_rna-XM_022431571.1	Crassostrea_virginica_species_rna-XM_022431572.1	Crassostrea_virginica_species_rna-XM_022431573.1	Crassostrea_virginica_species_rna-XM_022448117.1	Crassostrea_virginica_species_rna-XM_022448119.1	Crassostrea_virginica_species_rna-XM_022448118.1	Crassostrea_virginica_species_rna-XM_022448120.1	Crassostrea_virginica_species_rna-XM_022448116.1	Crassostrea_virginica_species_rna-XM_022448121.1	Crassostrea_virginica_species_rna-XM_022434114.1	Crassostrea_virginica_species_rna-XM_022434113.1	Crassostrea_virginica_species_rna-XM_022431269.1	Crassostrea_virginica_species_rna-XM_022431270.1
group183	other_ortholog	Bathymodiolus_platifrons_species_5866:Bpl_scaf_4775-1.14-mRNA-1	Lottia_gigantea_species_rna-XM_009045615.1	Lottia_gigantea_species_rna-XM_009046619.1	Lottia_gigantea_species_rna-XM_009048799.1	Lottia_gigantea_species_rna-XM_009049270.1	Lottia_gigantea_species_rna-XM_009049548.1	Lottia_gigantea_species_rna-XM_009049587.1	Lottia_gigantea_species_rna-XM_009052068.1	Lottia_gigantea_species_rna-XM_009053876.1	Lottia_gigantea_species_rna-XM_009054491.1	Lottia_gigantea_species_rna-XM_009055152.1	Lottia_gigantea_species_rna-XM_009060323.1	Lottia_gigantea_species_rna-XM_009060641.1	Lottia_gigantea_species_rna-XM_009061368.1	Lottia_gigantea_species_rna-XM_009061674.1	Lottia_gigantea_species_rna-XM_009064180.1	Lottia_gigantea_species_rna-XM_009067485.1	Lottia_gigantea_species_rna-XM_009068840.1	Lottia_gigantea_species_rna-XM_009069172.1	Crassostrea_gigas_species_EVM0044045.1	Crassostrea_gigas_species_EVM0025362.1	Lottia_gigantea_species_rna-XM_009050765.1	Lottia_gigantea_species_rna-XM_009066350.1	Lottia_gigantea_species_rna-XM_009065816.1	Lottia_gigantea_species_rna-XM_009060494.1	Lottia_gigantea_species_rna-XM_009047636.1	Lottia_gigantea_species_rna-XM_009060847.1	Lottia_gigantea_species_rna-XM_009061672.1	Lottia_gigantea_species_rna-XM_009049475.1	Lottia_gigantea_species_rna-XM_009050146.1	Lottia_gigantea_species_rna-XM_009050763.1	Lottia_gigantea_species_rna-XM_009064747.1	Lottia_gigantea_species_rna-XM_009060845.1	Lottia_gigantea_species_rna-XM_009067487.1	Lottia_gigantea_species_rna-XM_009068890.1
group61073	species_special	Crassostrea_virginica_species_rna-XM_022452672.1
group18170	species_special	Crassostrea_gigas_species_EVM0027239.1	Crassostrea_gigas_species_EVM0002491.1	Crassostrea_gigas_species_EVM0003555.1
group68131	species_special	Lottia_gigantea_species_rna-XM_009061576.1
group17923	species_special	Corbicula_fluminea_species_EVM0007790.1	Corbicula_fluminea_species_EVM0007970.1	Corbicula_fluminea_species_EVM0024885.1
group41829	species_special	Corbicula_fluminea_species_EVM0007750.1
group53117	species_special	Corbicula_fluminea_species_EVM0023059.1
group69775	species_special	Lottia_gigantea_species_rna-XM_009065409.1
group1695	multi_ortholog	Bathymodiolus_platifrons_species_7364:Bpl_scaf_51395-0.15-mRNA-1	Bathymodiolus_platifrons_species_7364:Bpl_scaf_51395-0.14-mRNA-1	Crassostrea_gigas_species_EVM0004932.1	Crassostrea_gigas_species_EVM0001404.1	Crassostrea_virginica_species_rna-XM_022460670.1	Crassostrea_virginica_species_rna-XM_022460669.1	Lottia_gigantea_species_rna-XM_009063771.1	Crassostrea_gigas_species_EVM0049169.1	Crassostrea_gigas_species_EVM0058377.1	Corbicula_fluminea_species_EVM0005966.1	Lottia_gigantea_species_rna-XM_009063772.1	Corbicula_fluminea_species_EVM0023115.1	Corbicula_fluminea_species_EVM0016723.1
group18933	other_ortholog	Crassostrea_gigas_species_EVM0003749.1	Crassostrea_gigas_species_EVM0023117.1	Crassostrea_virginica_species_rna-XM_022477989.1
group48626	species_special	Corbicula_fluminea_species_EVM0000672.1
group38598	species_special	Bathymodiolus_platifrons_species_6261:Bpl_scaf_5428-16.9-mRNA-1
group59191	species_special	Crassostrea_virginica_species_rna-XM_022466135.1
group60702	species_special	Crassostrea_virginica_species_rna-XM_022451786.1
group56971	species_special	Crassostrea_gigas_species_EVM0032920.1
group27133	species_special	Crassostrea_gigas_species_EVM0053884.1	Crassostrea_gigas_species_EVM0021743.1
group34986	species_special	Bathymodiolus_platifrons_species_16048:Bpl_scaf_32713-5.13-mRNA-1
group11271	other_ortholog	Corbicula_fluminea_species_EVM0033323.1	Corbicula_fluminea_species_EVM0037957.1	Crassostrea_virginica_species_rna-XM_022463822.1	Crassostrea_gigas_species_EVM0044138.1	Crassostrea_gigas_species_EVM0048502.1
group63575	species_special	Lottia_gigantea_species_rna-XM_009050755.1
group11516	other_ortholog	Corbicula_fluminea_species_EVM0003062.1	Crassostrea_virginica_species_rna-XM_022449690.1	Crassostrea_virginica_species_rna-XM_022447264.1	Crassostrea_gigas_species_EVM0051176.1	Crassostrea_gigas_species_EVM0055765.2
group41253	species_special	Bathymodiolus_platifrons_species_13550:Bpl_scaf_9015-3.1-mRNA-1
group10979	other_ortholog	Bathymodiolus_platifrons_species_4888:Bpl_scaf_62887-0.4-mRNA-1	Crassostrea_gigas_species_EVM0054773.1	Corbicula_fluminea_species_EVM0016313.1	Crassostrea_gigas_species_EVM0012774.1	Crassostrea_virginica_species_rna-XM_022481640.1
group9140	other_ortholog	Corbicula_fluminea_species_EVM0024776.1	Corbicula_fluminea_species_EVM0021939.1	Lottia_gigantea_species_rna-XM_009057146.1	Crassostrea_gigas_species_EVM0021544.1	Crassostrea_gigas_species_EVM0029978.1	Crassostrea_virginica_species_rna-XM_022464931.1
group53223	species_special	Corbicula_fluminea_species_EVM0018322.1
group36151	species_special	Bathymodiolus_platifrons_species_2221:Bpl_scaf_40435-0.0-mRNA-1
group54652	species_special	Crassostrea_gigas_species_EVM0031088.1
group50723	species_special	Corbicula_fluminea_species_EVM0016969.1
group45997	species_special	Corbicula_fluminea_species_EVM0024801.1
group70995	species_special	Lottia_gigantea_species_rna-XM_009068158.1
group61556	species_special	Lottia_gigantea_species_rna-XM_009046131.1
group70684	species_special	Lottia_gigantea_species_rna-XM_009067677.1
group57601	species_special	Crassostrea_gigas_species_EVM0002655.1
group3393	multi_ortholog	Bathymodiolus_platifrons_species_13645:Bpl_scaf_33993-0.19-mRNA-1	Crassostrea_virginica_species_rna-XM_022490266.1	Crassostrea_virginica_species_rna-XM_022490265.1	Crassostrea_virginica_species_rna-XM_022490267.1	Crassostrea_virginica_species_rna-XM_022490268.1	Crassostrea_gigas_species_EVM0057826.1	Corbicula_fluminea_species_EVM0003755.1	Crassostrea_gigas_species_EVM0057987.1	Lottia_gigantea_species_rna-XM_009052366.1
group28261	species_special	Crassostrea_gigas_species_EVM0056996.3	Crassostrea_gigas_species_EVM0024560.1
group20107	species_special	Crassostrea_gigas_species_EVM0045612.1	Crassostrea_gigas_species_EVM0031697.1	Crassostrea_gigas_species_EVM0004179.1
group15980	other_ortholog	Crassostrea_gigas_species_EVM0051263.1	Crassostrea_virginica_species_rna-XM_022451981.1	Crassostrea_virginica_species_rna-XM_022452712.1	Lottia_gigantea_species_rna-XM_009065820.1
group30272	species_special	Crassostrea_virginica_species_rna-XM_022434934.1	Crassostrea_virginica_species_rna-XM_022438459.1
group37431	species_special	Bathymodiolus_platifrons_species_1784:Bpl_scaf_48125-1.16-mRNA-1
group2929	multi_ortholog	Bathymodiolus_platifrons_species_13615:Bpl_scaf_61340-13.6-mRNA-1	Corbicula_fluminea_species_EVM0035857.1	Crassostrea_gigas_species_EVM0006277.1	Crassostrea_virginica_species_rna-XM_022460193.1	Crassostrea_virginica_species_rna-XM_022460192.1	Crassostrea_gigas_species_EVM0041016.1	Crassostrea_virginica_species_rna-XM_022460077.1	Crassostrea_virginica_species_rna-XM_022460078.1	Crassostrea_virginica_species_rna-XM_022460079.1	Lottia_gigantea_species_rna-XM_009056528.1
group67984	species_special	Lottia_gigantea_species_rna-XM_009061191.1
group45268	species_special	Corbicula_fluminea_species_EVM0007263.1
group9350	other_ortholog	Crassostrea_gigas_species_EVM0000257.1	Crassostrea_gigas_species_EVM0051830.1	Crassostrea_gigas_species_EVM0030992.1	Crassostrea_gigas_species_EVM0056201.1	Crassostrea_gigas_species_EVM0023756.1	Crassostrea_virginica_species_rna-XM_022445177.1
group7080	species_special	Lottia_gigantea_species_rna-XM_009047317.1	Lottia_gigantea_species_rna-XM_009065681.1	Lottia_gigantea_species_rna-XM_009067302.1	Lottia_gigantea_species_rna-XM_009052276.1	Lottia_gigantea_species_rna-XM_009067288.1	Lottia_gigantea_species_rna-XM_009057596.1	Lottia_gigantea_species_rna-XM_009065133.1
group1891	species_special	Bathymodiolus_platifrons_species_2786:Bpl_scaf_4150-5.6-mRNA-1	Bathymodiolus_platifrons_species_13959:Bpl_scaf_3213-0.14-mRNA-1	Bathymodiolus_platifrons_species_7662:Bpl_scaf_3378-0.9-mRNA-1	Bathymodiolus_platifrons_species_6032:Bpl_scaf_33027-0.14-mRNA-1	Bathymodiolus_platifrons_species_6273:Bpl_scaf_16398-1.19-mRNA-1	Bathymodiolus_platifrons_species_12861:Bpl_scaf_17573-0.17-mRNA-1	Bathymodiolus_platifrons_species_12822:Bpl_scaf_40684-0.3-mRNA-1	Bathymodiolus_platifrons_species_16360:Bpl_scaf_37654-3.52-mRNA-1	Bathymodiolus_platifrons_species_7981:Bpl_scaf_36542-0.9-mRNA-1	Bathymodiolus_platifrons_species_8217:Bpl_scaf_45815-0.24-mRNA-1	Bathymodiolus_platifrons_species_13971:Bpl_scaf_42599-0.4-mRNA-1	Bathymodiolus_platifrons_species_6032:Bpl_scaf_33027-1.5-mRNA-1
group1069	multi_ortholog	Bathymodiolus_platifrons_species_13887:Bpl_scaf_21031-0.36-mRNA-1	Crassostrea_virginica_species_rna-XM_022481014.1	Crassostrea_virginica_species_rna-XM_022482654.1	Crassostrea_gigas_species_EVM0017801.1	Crassostrea_gigas_species_EVM0048567.1	Corbicula_fluminea_species_EVM0030120.1	Corbicula_fluminea_species_EVM0018026.1	Corbicula_fluminea_species_EVM0036940.1	Lottia_gigantea_species_rna-XM_009061285.1	Corbicula_fluminea_species_EVM0030201.1	Corbicula_fluminea_species_EVM0012717.1	Corbicula_fluminea_species_EVM0012076.1	Corbicula_fluminea_species_EVM0008482.1	Corbicula_fluminea_species_EVM0035210.1	Corbicula_fluminea_species_EVM0011160.1	Corbicula_fluminea_species_EVM0033725.1
group27150	species_special	Crassostrea_gigas_species_EVM0056485.4	Crassostrea_gigas_species_EVM0056281.1
group35463	species_special	Bathymodiolus_platifrons_species_8499:Bpl_scaf_35634-0.9-mRNA-1
group6387	multi_ortholog	Bathymodiolus_platifrons_species_8407:Bpl_scaf_9507-2.17-mRNA-1	Crassostrea_gigas_species_EVM0033217.1	Crassostrea_virginica_species_rna-XM_022437409.1	Crassostrea_virginica_species_rna-XM_022437411.1	Crassostrea_virginica_species_rna-XM_022437410.1	Corbicula_fluminea_species_EVM0004848.1	Lottia_gigantea_species_rna-XM_009062085.1
group6697	species_special	Crassostrea_gigas_species_EVM0022306.1	Crassostrea_gigas_species_EVM0048504.1	Crassostrea_gigas_species_EVM0036038.1	Crassostrea_gigas_species_EVM0006220.1	Crassostrea_gigas_species_EVM0038909.1	Crassostrea_gigas_species_EVM0047134.1	Crassostrea_gigas_species_EVM0057666.1
group69106	species_special	Lottia_gigantea_species_rna-XM_009063763.1
group38441	species_special	Bathymodiolus_platifrons_species_17569:Bpl_scaf_53585-0.0-mRNA-1
group66891	species_special	Lottia_gigantea_species_rna-XM_009058518.1
group48151	species_special	Corbicula_fluminea_species_EVM0005679.1
group38245	species_special	Bathymodiolus_platifrons_species_2532:Bpl_scaf_52671-2.19-mRNA-1
group58797	species_special	Crassostrea_virginica_species_rna-XM_022430520.1
group52249	species_special	Corbicula_fluminea_species_EVM0033715.1
group12279	other_ortholog	Crassostrea_gigas_species_EVM0027703.1	Crassostrea_gigas_species_EVM0034054.1	Crassostrea_virginica_species_rna-XM_022445963.1	Crassostrea_gigas_species_EVM0026690.1	Crassostrea_virginica_species_rna-XM_022444772.1
group45683	species_special	Corbicula_fluminea_species_EVM0007368.1
group8193	multi_ortholog	Bathymodiolus_platifrons_species_8410:Bpl_scaf_45868-1.7-mRNA-1	Crassostrea_gigas_species_EVM0016372.2	Crassostrea_virginica_species_rna-XM_022476205.1	Lottia_gigantea_species_rna-XM_009051069.1	Corbicula_fluminea_species_EVM0001727.1	Crassostrea_gigas_species_EVM0002675.1
group9620	other_ortholog	Crassostrea_gigas_species_EVM0047521.1	Crassostrea_virginica_species_rna-XM_022488110.1	Crassostrea_virginica_species_rna-XM_022488111.1	Crassostrea_virginica_species_rna-XM_022488113.1	Crassostrea_virginica_species_rna-XM_022488112.1	Crassostrea_virginica_species_rna-XM_022488114.1
group67366	species_special	Lottia_gigantea_species_rna-XM_009059740.1
group69521	species_special	Lottia_gigantea_species_rna-XM_009064788.1
group65431	species_special	Lottia_gigantea_species_rna-XM_009055026.1
group22859	species_special	Bathymodiolus_platifrons_species_280:Bpl_scaf_33543-3.17-mRNA-1	Bathymodiolus_platifrons_species_280:Bpl_scaf_33543-3.1-mRNA-1
group35477	species_special	Bathymodiolus_platifrons_species_7278:Bpl_scaf_35876-0.9-mRNA-1
group21057	other_ortholog	Crassostrea_gigas_species_EVM0019866.1	Crassostrea_gigas_species_EVM0011292.1	Crassostrea_virginica_species_rna-XM_022462959.1
group61865	species_special	Lottia_gigantea_species_rna-XM_009046898.1
group33736	species_special	Bathymodiolus_platifrons_species_17874:Bpl_scaf_25269-0.5-mRNA-1
group46104	species_special	Corbicula_fluminea_species_EVM0030361.1
group25035	species_special	Corbicula_fluminea_species_EVM0022794.1	Corbicula_fluminea_species_EVM0032735.1
group31743	species_special	Bathymodiolus_platifrons_species_4991:Bpl_scaf_13698-7.29-mRNA-1
group5196	multi_ortholog	Bathymodiolus_platifrons_species_14291:Bpl_scaf_12887-0.51-mRNA-1	Crassostrea_virginica_species_rna-XM_022484771.1	Crassostrea_gigas_species_EVM0023152.1	Corbicula_fluminea_species_EVM0017108.1	Corbicula_fluminea_species_EVM0007271.1	Crassostrea_gigas_species_EVM0027921.1	Lottia_gigantea_species_rna-XM_009046268.1
group25180	species_special	Corbicula_fluminea_species_EVM0011754.1	Corbicula_fluminea_species_EVM0005222.1
group12084	other_ortholog	Crassostrea_gigas_species_EVM0012540.1	Crassostrea_gigas_species_EVM0055830.1	Crassostrea_virginica_species_rna-XM_022488535.1	Crassostrea_virginica_species_rna-XM_022481120.1	Crassostrea_virginica_species_rna-XM_022481119.1
group20953	other_ortholog	Crassostrea_gigas_species_EVM0028872.1	Crassostrea_gigas_species_EVM0008954.1	Crassostrea_virginica_species_rna-XM_022463982.1
group45707	species_special	Corbicula_fluminea_species_EVM0001269.1
group62685	species_special	Lottia_gigantea_species_rna-XM_009048749.1
group58179	species_special	Crassostrea_gigas_species_EVM0012430.1
group28646	species_special	Crassostrea_gigas_species_EVM0005142.1	Crassostrea_gigas_species_EVM0009362.1
group46573	species_special	Corbicula_fluminea_species_EVM0024841.1
group15034	other_ortholog	Crassostrea_virginica_species_rna-XM_022482546.1	Crassostrea_virginica_species_rna-XM_022487836.1	Crassostrea_gigas_species_EVM0056544.1	Crassostrea_gigas_species_EVM0002029.1
group25684	species_special	Corbicula_fluminea_species_EVM0025212.1	Corbicula_fluminea_species_EVM0015341.1
group8316	multi_ortholog	Bathymodiolus_platifrons_species_5520:Bpl_scaf_50404-2.11-mRNA-1	Crassostrea_gigas_species_EVM0002390.1	Crassostrea_virginica_species_rna-XM_022480992.1	Crassostrea_gigas_species_EVM0004496.1	Corbicula_fluminea_species_EVM0021707.1	Lottia_gigantea_species_rna-XM_009050638.1
group64806	species_special	Lottia_gigantea_species_rna-XM_009053615.1
group37110	species_special	Bathymodiolus_platifrons_species_4219:Bpl_scaf_45908-9.27-mRNA-1
group53521	species_special	Crassostrea_gigas_species_EVM0029640.1
group31973	species_special	Bathymodiolus_platifrons_species_6212:Bpl_scaf_15271-3.18-mRNA-1
group43058	species_special	Corbicula_fluminea_species_EVM0021293.1
group55739	species_special	Crassostrea_gigas_species_EVM0047968.1
group50115	species_special	Corbicula_fluminea_species_EVM0023892.1
group18125	species_special	Corbicula_fluminea_species_EVM0010236.1	Corbicula_fluminea_species_EVM0008819.1	Corbicula_fluminea_species_EVM0035837.1
group36959	species_special	Bathymodiolus_platifrons_species_5876:Bpl_scaf_44832-4.1-mRNA-1
group60942	species_special	Crassostrea_virginica_species_rna-XM_022452349.1
group45811	species_special	Corbicula_fluminea_species_EVM0002554.1
group23682	species_special	Bathymodiolus_platifrons_species_17776:Bpl_scaf_64954-2.0-mRNA-1	Bathymodiolus_platifrons_species_14149:Bpl_scaf_8199-0.0-mRNA-1
group16010	other_ortholog	Crassostrea_gigas_species_EVM0008052.1	Crassostrea_gigas_species_EVM0028280.1	Crassostrea_virginica_species_rna-XM_022441137.1	Crassostrea_virginica_species_rna-XM_022474726.1
group12565	species_special	Crassostrea_virginica_species_rna-XM_022433651.1	Crassostrea_virginica_species_rna-XM_022433652.1	Crassostrea_virginica_species_rna-XM_022433653.1	Crassostrea_virginica_species_rna-XM_022433654.1	Crassostrea_virginica_species_rna-XM_022434652.1
group2551	other_ortholog	Crassostrea_gigas_species_EVM0053766.1	Crassostrea_virginica_species_rna-XM_022451805.1	Crassostrea_virginica_species_rna-XM_022456386.1	Crassostrea_virginica_species_rna-XM_022457106.1	Crassostrea_gigas_species_EVM0006671.1	Crassostrea_virginica_species_rna-XM_022449816.1	Crassostrea_virginica_species_rna-XM_022457107.1	Crassostrea_virginica_species_rna-XM_022456387.1	Crassostrea_virginica_species_rna-XM_022454695.1	Crassostrea_virginica_species_rna-XM_022454696.1	Crassostrea_virginica_species_rna-XM_022454694.1
group15864	other_ortholog	Crassostrea_virginica_species_rna-XM_022460139.1	Crassostrea_virginica_species_rna-XM_022460138.1	Crassostrea_virginica_species_rna-XM_022460137.1	Lottia_gigantea_species_rna-XM_009067118.1
group64007	species_special	Lottia_gigantea_species_rna-XM_009051727.1
group2214	species_special	Crassostrea_virginica_species_rna-XM_022441518.1	Crassostrea_virginica_species_rna-XM_022441339.1	Crassostrea_virginica_species_rna-XM_022441923.1	Crassostrea_virginica_species_rna-XM_022446478.1	Crassostrea_virginica_species_rna-XM_022446209.1	Crassostrea_virginica_species_rna-XM_022446208.1	Crassostrea_virginica_species_rna-XM_022446479.1	Crassostrea_virginica_species_rna-XM_022446210.1	Crassostrea_virginica_species_rna-XM_022441180.1	Crassostrea_virginica_species_rna-XM_022442902.1	Crassostrea_virginica_species_rna-XM_022441182.1	Crassostrea_virginica_species_rna-XM_022441181.1
group15418	other_ortholog	Crassostrea_gigas_species_EVM0046656.1	Crassostrea_gigas_species_EVM0001478.1	Crassostrea_virginica_species_rna-XM_022472381.1	Crassostrea_virginica_species_rna-XM_022471145.1
group33524	species_special	Bathymodiolus_platifrons_species_8533:Bpl_scaf_2428-2.19-mRNA-1
group48560	species_special	Corbicula_fluminea_species_EVM0034956.1
group32662	species_special	Bathymodiolus_platifrons_species_13394:Bpl_scaf_18892-0.6-mRNA-1
group6444	species_special	Corbicula_fluminea_species_EVM0006825.1	Corbicula_fluminea_species_EVM0015134.1	Corbicula_fluminea_species_EVM0015204.1	Corbicula_fluminea_species_EVM0020510.1	Corbicula_fluminea_species_EVM0035966.1	Corbicula_fluminea_species_EVM0036923.1	Corbicula_fluminea_species_EVM0013781.1
group1231	multi_ortholog	Bathymodiolus_platifrons_species_649:Bpl_scaf_20125-4.4-mRNA-1	Crassostrea_virginica_species_rna-XM_022453333.1	Crassostrea_virginica_species_rna-XM_022453334.1	Crassostrea_virginica_species_rna-XM_022453335.1	Crassostrea_virginica_species_rna-XM_022453332.1	Crassostrea_virginica_species_rna-XM_022454437.1	Crassostrea_virginica_species_rna-XM_022454440.1	Crassostrea_virginica_species_rna-XM_022454438.1	Crassostrea_virginica_species_rna-XM_022454439.1	Crassostrea_virginica_species_rna-XM_022454436.1	Crassostrea_virginica_species_rna-XM_022454441.1	Crassostrea_gigas_species_EVM0024898.3	Lottia_gigantea_species_rna-XM_009056376.1	Crassostrea_gigas_species_EVM0048540.1	Corbicula_fluminea_species_EVM0008325.1
group14968	other_ortholog	Crassostrea_gigas_species_EVM0037708.1	Crassostrea_gigas_species_EVM0025766.1	Crassostrea_virginica_species_rna-XM_022435168.1	Crassostrea_virginica_species_rna-XM_022430699.1
group64207	species_special	Lottia_gigantea_species_rna-XM_009052220.1
group38371	species_special	Bathymodiolus_platifrons_species_18666:Bpl_scaf_53159-3.11-mRNA-1
group32410	species_special	Bathymodiolus_platifrons_species_13315:Bpl_scaf_17128-9.16-mRNA-1
group44865	species_special	Corbicula_fluminea_species_EVM0028951.1
group68714	species_special	Lottia_gigantea_species_rna-XM_009062867.1
group3558	multi_ortholog	Bathymodiolus_platifrons_species_2654:Bpl_scaf_59648-5.6-mRNA-1	Crassostrea_virginica_species_rna-XM_022446502.1	Crassostrea_virginica_species_rna-XM_022447239.1	Crassostrea_virginica_species_rna-XM_022447240.1	Crassostrea_gigas_species_EVM0013819.1	Corbicula_fluminea_species_EVM0033339.1	Corbicula_fluminea_species_EVM0022188.1	Lottia_gigantea_species_rna-XM_009051931.1	Crassostrea_gigas_species_EVM0017570.1
group62586	species_special	Lottia_gigantea_species_rna-XM_009048529.1
group51197	species_special	Corbicula_fluminea_species_EVM0028919.1
group49420	species_special	Corbicula_fluminea_species_EVM0024263.1
group62427	species_special	Lottia_gigantea_species_rna-XM_009048210.1
group40166	species_special	Bathymodiolus_platifrons_species_16920:Bpl_scaf_61969-3.9-mRNA-1
group54530	species_special	Crassostrea_gigas_species_EVM0019726.2
group6688	other_ortholog	Crassostrea_gigas_species_EVM0041581.1	Crassostrea_gigas_species_EVM0055812.1	Crassostrea_virginica_species_rna-XM_022450694.1	Crassostrea_virginica_species_rna-XM_022450695.1	Crassostrea_virginica_species_rna-XM_022450696.1	Crassostrea_virginica_species_rna-XM_022450697.1	Crassostrea_virginica_species_rna-XM_022450698.1
group9268	other_ortholog	Crassostrea_gigas_species_EVM0052511.1	Crassostrea_gigas_species_EVM0017121.1	Crassostrea_virginica_species_rna-XM_022438659.1	Crassostrea_virginica_species_rna-XM_022438669.1	Crassostrea_virginica_species_rna-XM_022453485.1	Crassostrea_virginica_species_rna-XM_022453476.1
group68203	species_special	Lottia_gigantea_species_rna-XM_009061758.1
group32759	species_special	Bathymodiolus_platifrons_species_12687:Bpl_scaf_19386-1.2-mRNA-1
group15978	other_ortholog	Crassostrea_gigas_species_EVM0024441.1	Crassostrea_gigas_species_EVM0003635.1	Crassostrea_virginica_species_rna-XM_022467582.1	Crassostrea_gigas_species_EVM0053028.1
group41304	species_special	Bathymodiolus_platifrons_species_17195:Bpl_scaf_9415-4.4-mRNA-1
group28112	species_special	Crassostrea_gigas_species_EVM0048279.1	Crassostrea_gigas_species_EVM0012524.1
group60111	species_special	Crassostrea_virginica_species_rna-XM_022434791.1
group26926	species_special	Crassostrea_gigas_species_EVM0023375.1	Crassostrea_gigas_species_EVM0005349.1
group13609	species_special	Corbicula_fluminea_species_EVM0025410.1	Corbicula_fluminea_species_EVM0001702.1	Corbicula_fluminea_species_EVM0009559.1	Corbicula_fluminea_species_EVM0029480.1
group24678	species_special	Corbicula_fluminea_species_EVM0004094.1	Corbicula_fluminea_species_EVM0008944.1
group5114	species_special	Crassostrea_virginica_species_rna-XM_022453999.1	Crassostrea_virginica_species_rna-XM_022454630.1	Crassostrea_virginica_species_rna-XM_022454001.1	Crassostrea_virginica_species_rna-XM_022454631.1	Crassostrea_virginica_species_rna-XM_022454479.1	Crassostrea_virginica_species_rna-XM_022454002.1	Crassostrea_virginica_species_rna-XM_022454480.1	Crassostrea_virginica_species_rna-XM_022454481.1
group31065	species_special	Lottia_gigantea_species_rna-XM_009061084.1	Lottia_gigantea_species_rna-XM_009064119.1
group11599	species_special	Crassostrea_gigas_species_EVM0027527.1	Crassostrea_gigas_species_EVM0044752.1	Crassostrea_gigas_species_EVM0043647.1	Crassostrea_gigas_species_EVM0020156.1	Crassostrea_gigas_species_EVM0000097.1
group66707	species_special	Lottia_gigantea_species_rna-XM_009058086.1
group16424	species_special	Bathymodiolus_platifrons_species_18672:Bpl_scaf_1211-0.0-mRNA-1	Bathymodiolus_platifrons_species_1939:Bpl_scaf_5646-0.0-mRNA-1	Bathymodiolus_platifrons_species_6884:Bpl_scaf_64837-1.4-mRNA-1
group3253	multi_ortholog	Bathymodiolus_platifrons_species_13465:Bpl_scaf_16054-2.22-mRNA-1	Corbicula_fluminea_species_EVM0031160.2	Crassostrea_gigas_species_EVM0049119.1	Crassostrea_gigas_species_EVM0049304.1	Crassostrea_virginica_species_rna-XM_022458980.1	Crassostrea_virginica_species_rna-XM_022468170.1	Crassostrea_virginica_species_rna-XM_022468171.1	Lottia_gigantea_species_rna-XM_009066328.1	Lottia_gigantea_species_rna-XM_009067515.1
group45274	species_special	Corbicula_fluminea_species_EVM0013840.1
group3365	multi_ortholog	Bathymodiolus_platifrons_species_9120:Bpl_scaf_30260-2.33-mRNA-1	Corbicula_fluminea_species_EVM0037516.1	Crassostrea_gigas_species_EVM0055293.1	Lottia_gigantea_species_rna-XM_009053718.1	Crassostrea_virginica_species_rna-XM_022436699.1	Crassostrea_virginica_species_rna-XM_022436705.1	Crassostrea_virginica_species_rna-XM_022441918.1	Crassostrea_virginica_species_rna-XM_022441924.1	Bathymodiolus_platifrons_species_540:Bpl_scaf_49265-0.0-mRNA-1
group11746	species_special	Crassostrea_gigas_species_EVM0048403.1	Crassostrea_gigas_species_EVM0043522.1	Crassostrea_gigas_species_EVM0036108.1	Crassostrea_gigas_species_EVM0009254.1	Crassostrea_gigas_species_EVM0058209.1
group41415	species_special	Corbicula_fluminea_species_EVM0031558.1
group18079	species_special	Corbicula_fluminea_species_EVM0024264.1	Corbicula_fluminea_species_EVM0019803.1	Corbicula_fluminea_species_EVM0010377.1
group6838	other_ortholog	Crassostrea_gigas_species_EVM0031343.1	Crassostrea_gigas_species_EVM0010188.1	Crassostrea_gigas_species_EVM0056089.1	Crassostrea_gigas_species_EVM0035354.1	Crassostrea_virginica_species_rna-XM_022487500.1	Crassostrea_virginica_species_rna-XM_022487499.1	Crassostrea_virginica_species_rna-XM_022487502.1
group21563	species_special	Crassostrea_virginica_species_rna-XM_022439307.1	Crassostrea_virginica_species_rna-XM_022455460.1	Crassostrea_virginica_species_rna-XM_022455331.1
group19992	other_ortholog	Crassostrea_gigas_species_EVM0020399.1	Crassostrea_gigas_species_EVM0034555.1	Crassostrea_virginica_species_rna-XM_022483769.1
group3884	other_ortholog	Crassostrea_gigas_species_EVM0038711.1	Crassostrea_gigas_species_EVM0056737.1	Crassostrea_gigas_species_EVM0019488.1	Crassostrea_virginica_species_rna-XM_022451446.1	Crassostrea_gigas_species_EVM0016246.1	Crassostrea_gigas_species_EVM0002304.1	Crassostrea_gigas_species_EVM0035857.1	Crassostrea_gigas_species_EVM0056555.1	Crassostrea_gigas_species_EVM0042589.1
group66136	species_special	Lottia_gigantea_species_rna-XM_009056731.1
group7028	species_special	Crassostrea_virginica_species_rna-XM_022434911.1	Crassostrea_virginica_species_rna-XM_022437006.1	Crassostrea_virginica_species_rna-XM_022457127.1	Crassostrea_virginica_species_rna-XM_022453259.1	Crassostrea_virginica_species_rna-XM_022455110.1	Crassostrea_virginica_species_rna-XM_022442448.1	Crassostrea_virginica_species_rna-XM_022450093.1
group15543	other_ortholog	Crassostrea_gigas_species_EVM0000513.1	Crassostrea_gigas_species_EVM0004141.1	Crassostrea_virginica_species_rna-XM_022443559.1	Crassostrea_virginica_species_rna-XM_022443766.1
group34573	species_special	Bathymodiolus_platifrons_species_17912:Bpl_scaf_30249-1.2-mRNA-1
group52048	species_special	Corbicula_fluminea_species_EVM0026374.1
group17769	species_special	Corbicula_fluminea_species_EVM0036539.1	Corbicula_fluminea_species_EVM0015472.1	Corbicula_fluminea_species_EVM0033057.1
group70251	species_special	Lottia_gigantea_species_rna-XM_009066631.1
group28385	species_special	Crassostrea_gigas_species_EVM0041120.1	Crassostrea_gigas_species_EVM0034277.1
group54122	species_special	Crassostrea_gigas_species_EVM0044122.1
group20340	other_ortholog	Crassostrea_gigas_species_EVM0028905.1	Crassostrea_gigas_species_EVM0044368.1	Crassostrea_virginica_species_rna-XM_022467256.1
group65253	species_special	Lottia_gigantea_species_rna-XM_009054603.1
group58383	species_special	Crassostrea_gigas_species_EVM0020015.1
group37907	species_special	Bathymodiolus_platifrons_species_7590:Bpl_scaf_50294-3.10-mRNA-1
group64696	species_special	Lottia_gigantea_species_rna-XM_009053375.1
group63398	species_special	Lottia_gigantea_species_rna-XM_009050336.1
group50444	species_special	Corbicula_fluminea_species_EVM0015469.1
group40282	species_special	Bathymodiolus_platifrons_species_2194:Bpl_scaf_62515-2.8-mRNA-1
group45772	species_special	Corbicula_fluminea_species_EVM0016806.1
group63913	species_special	Lottia_gigantea_species_rna-XM_009051487.1
group60420	species_special	Crassostrea_virginica_species_rna-XM_022444910.1
group37241	species_special	Bathymodiolus_platifrons_species_5414:Bpl_scaf_46651-2.41-mRNA-1
group17041	species_special	Bathymodiolus_platifrons_species_10159:Bpl_scaf_41436-4.1-mRNA-1	Bathymodiolus_platifrons_species_10159:Bpl_scaf_41436-4.5-mRNA-1	Bathymodiolus_platifrons_species_13022:Bpl_scaf_59823-0.5-mRNA-1
group67809	species_special	Lottia_gigantea_species_rna-XM_009060787.1
group68885	species_special	Lottia_gigantea_species_rna-XM_009063272.1
group41302	species_special	Bathymodiolus_platifrons_species_17195:Bpl_scaf_9415-3.6-mRNA-1
group14784	other_ortholog	Crassostrea_gigas_species_EVM0000107.1	Crassostrea_gigas_species_EVM0046201.1	Crassostrea_virginica_species_rna-XM_022487199.1	Crassostrea_virginica_species_rna-XM_022488313.1
group22022	other_ortholog	Bathymodiolus_platifrons_species_3347:Bpl_scaf_1324-2.24-mRNA-1	Corbicula_fluminea_species_EVM0036743.1
group6626	species_special	Crassostrea_gigas_species_EVM0020111.1	Crassostrea_gigas_species_EVM0022774.1	Crassostrea_gigas_species_EVM0009610.1	Crassostrea_gigas_species_EVM0007471.1	Crassostrea_gigas_species_EVM0020110.1	Crassostrea_gigas_species_EVM0043153.1	Crassostrea_gigas_species_EVM0003725.1
group4238	multi_ortholog	Bathymodiolus_platifrons_species_13039:Bpl_scaf_2945-1.8-mRNA-1	Lottia_gigantea_species_rna-XM_009057558.1	Bathymodiolus_platifrons_species_13302:Bpl_scaf_52731-7.5-mRNA-1	Crassostrea_gigas_species_EVM0044522.1	Crassostrea_virginica_species_rna-XM_022476434.1	Crassostrea_virginica_species_rna-XM_022476476.1	Corbicula_fluminea_species_EVM0009448.1	Crassostrea_gigas_species_EVM0034804.1
group22676	other_ortholog	Bathymodiolus_platifrons_species_7921:Bpl_scaf_28059-1.20-mRNA-1	Corbicula_fluminea_species_EVM0000759.1
group53075	species_special	Corbicula_fluminea_species_EVM0033918.1
group59188	species_special	Crassostrea_virginica_species_rna-XM_022466984.1
group50946	species_special	Corbicula_fluminea_species_EVM0001606.1
group59359	species_special	Crassostrea_virginica_species_rna-XM_022479126.1
group33760	species_special	Bathymodiolus_platifrons_species_14980:Bpl_scaf_25498-0.16-mRNA-1
group1534	other_ortholog	Crassostrea_gigas_species_EVM0043388.1	Crassostrea_gigas_species_EVM0049164.1	Crassostrea_virginica_species_rna-XM_022434086.1	Crassostrea_virginica_species_rna-XM_022434085.1	Crassostrea_virginica_species_rna-XM_022434084.1	Crassostrea_virginica_species_rna-XM_022433568.1	Crassostrea_virginica_species_rna-XM_022434083.1	Crassostrea_virginica_species_rna-XM_022434082.1	Crassostrea_virginica_species_rna-XM_022434079.1	Crassostrea_virginica_species_rna-XM_022434081.1	Crassostrea_virginica_species_rna-XM_022434078.1	Crassostrea_virginica_species_rna-XM_022434624.1	Crassostrea_virginica_species_rna-XM_022434632.1	Crassostrea_virginica_species_rna-XM_022449168.1
group25830	species_special	Corbicula_fluminea_species_EVM0030515.1	Corbicula_fluminea_species_EVM0007502.1
group41182	species_special	Bathymodiolus_platifrons_species_5403:Bpl_scaf_8610-0.16-mRNA-1
group17515	species_special	Corbicula_fluminea_species_EVM0018947.1	Corbicula_fluminea_species_EVM0025167.1	Corbicula_fluminea_species_EVM0002364.1
group47237	species_special	Corbicula_fluminea_species_EVM0023242.1
group13720	species_special	Corbicula_fluminea_species_EVM0016974.1	Corbicula_fluminea_species_EVM0028781.1	Corbicula_fluminea_species_EVM0034496.1	Corbicula_fluminea_species_EVM0023787.1
group125	other_ortholog	Crassostrea_gigas_species_EVM0004941.1	Crassostrea_gigas_species_EVM0039290.1	Crassostrea_virginica_species_rna-XM_022479811.1	Crassostrea_virginica_species_rna-XM_022479812.1	Crassostrea_virginica_species_rna-XM_022479824.1	Crassostrea_virginica_species_rna-XM_022479813.1	Crassostrea_virginica_species_rna-XM_022479814.1	Crassostrea_virginica_species_rna-XM_022479816.1	Crassostrea_virginica_species_rna-XM_022479817.1	Crassostrea_virginica_species_rna-XM_022479818.1	Crassostrea_virginica_species_rna-XM_022479819.1	Crassostrea_virginica_species_rna-XM_022479820.1	Crassostrea_virginica_species_rna-XM_022479821.1	Crassostrea_virginica_species_rna-XM_022479822.1	Crassostrea_virginica_species_rna-XM_022479823.1	Crassostrea_virginica_species_rna-XM_022479825.1	Crassostrea_virginica_species_rna-XM_022479810.1	Crassostrea_virginica_species_rna-XM_022479808.1	Crassostrea_virginica_species_rna-XM_022479807.1	Crassostrea_virginica_species_rna-XM_022484173.1	Crassostrea_virginica_species_rna-XM_022484174.1	Crassostrea_virginica_species_rna-XM_022484181.1	Crassostrea_virginica_species_rna-XM_022484178.1	Crassostrea_virginica_species_rna-XM_022484179.1	Crassostrea_virginica_species_rna-XM_022484180.1	Crassostrea_virginica_species_rna-XM_022484175.1	Crassostrea_virginica_species_rna-XM_022484177.1	Crassostrea_virginica_species_rna-XM_022484157.1	Crassostrea_virginica_species_rna-XM_022484158.1	Crassostrea_virginica_species_rna-XM_022484169.1	Crassostrea_virginica_species_rna-XM_022484171.1	Crassostrea_virginica_species_rna-XM_022484161.1	Crassostrea_virginica_species_rna-XM_022484159.1	Crassostrea_virginica_species_rna-XM_022484165.1	Crassostrea_virginica_species_rna-XM_022484162.1	Crassostrea_virginica_species_rna-XM_022484163.1	Crassostrea_virginica_species_rna-XM_022484164.1	Crassostrea_virginica_species_rna-XM_022484166.1	Crassostrea_virginica_species_rna-XM_022484170.1	Crassostrea_virginica_species_rna-XM_022484167.1	Crassostrea_virginica_species_rna-XM_022484168.1	Crassostrea_virginica_species_rna-XM_022484172.1
group27492	other_ortholog	Crassostrea_gigas_species_EVM0002375.1	Crassostrea_virginica_species_rna-XM_022453454.1
group42890	species_special	Corbicula_fluminea_species_EVM0026674.1
group2385	multi_ortholog	Bathymodiolus_platifrons_species_119:Bpl_scaf_46023-5.17-mRNA-1	Crassostrea_gigas_species_EVM0042459.3	Crassostrea_virginica_species_rna-XM_022481941.1	Crassostrea_virginica_species_rna-XM_022481940.1	Crassostrea_virginica_species_rna-XM_022481939.1	Crassostrea_virginica_species_rna-XM_022479785.1	Crassostrea_virginica_species_rna-XM_022479784.1	Corbicula_fluminea_species_EVM0038841.1	Lottia_gigantea_species_rna-XM_009055052.1	Crassostrea_gigas_species_EVM0014845.1	Corbicula_fluminea_species_EVM0024875.1
group24478	species_special	Corbicula_fluminea_species_EVM0030999.1	Corbicula_fluminea_species_EVM0013625.1
group16120	species_special	Crassostrea_virginica_species_rna-XM_022481200.1	Crassostrea_virginica_species_rna-XM_022481199.1	Crassostrea_virginica_species_rna-XM_022481198.1	Crassostrea_virginica_species_rna-XM_022481203.1
group36105	species_special	Bathymodiolus_platifrons_species_17789:Bpl_scaf_40105-5.10-mRNA-1
group51978	species_special	Corbicula_fluminea_species_EVM0019530.1
group51133	species_special	Corbicula_fluminea_species_EVM0017356.1
group22936	species_special	Bathymodiolus_platifrons_species_7973:Bpl_scaf_36028-1.6-mRNA-1	Bathymodiolus_platifrons_species_3730:Bpl_scaf_38476-1.3-mRNA-1
group27117	species_special	Crassostrea_gigas_species_EVM0016003.1	Crassostrea_gigas_species_EVM0039931.1
group4392	multi_ortholog	Bathymodiolus_platifrons_species_1706:Bpl_scaf_44166-5.6-mRNA-1	Crassostrea_virginica_species_rna-XM_022460685.1	Crassostrea_virginica_species_rna-XM_022459617.1	Crassostrea_gigas_species_EVM0000239.1	Crassostrea_gigas_species_EVM0023359.1	Lottia_gigantea_species_rna-XM_009049761.1	Corbicula_fluminea_species_EVM0026581.1	Lottia_gigantea_species_rna-XM_009061719.1
group22194	species_special	Bathymodiolus_platifrons_species_8652:Bpl_scaf_16875-0.1-mRNA-1	Bathymodiolus_platifrons_species_1781:Bpl_scaf_37249-0.15-mRNA-1
group25910	species_special	Corbicula_fluminea_species_EVM0019691.1	Corbicula_fluminea_species_EVM0012912.1
group35692	species_special	Bathymodiolus_platifrons_species_3305:Bpl_scaf_3705-3.15-mRNA-1
group57145	species_special	Crassostrea_gigas_species_EVM0015649.1
group44766	species_special	Corbicula_fluminea_species_EVM0021226.2
group1228	species_special	Bathymodiolus_platifrons_species_9922:Bpl_scaf_19490-3.0-mRNA-1	Bathymodiolus_platifrons_species_9808:Bpl_scaf_34753-0.0-mRNA-1	Bathymodiolus_platifrons_species_4681:Bpl_scaf_22160-1.0-mRNA-1	Bathymodiolus_platifrons_species_4166:Bpl_scaf_6079-1.0-mRNA-1	Bathymodiolus_platifrons_species_6008:Bpl_scaf_44615-3.0-mRNA-1	Bathymodiolus_platifrons_species_16997:Bpl_scaf_64310-3.1-mRNA-1	Bathymodiolus_platifrons_species_16823:Bpl_scaf_34276-0.1-mRNA-1	Bathymodiolus_platifrons_species_4352:Bpl_scaf_53484-0.0-mRNA-1	Bathymodiolus_platifrons_species_1798:Bpl_scaf_2981-0.8-mRNA-1	Bathymodiolus_platifrons_species_11453:Bpl_scaf_43466-5.0-mRNA-1	Bathymodiolus_platifrons_species_14882:Bpl_scaf_21087-0.0-mRNA-1	Bathymodiolus_platifrons_species_13238:Bpl_scaf_33255-0.0-mRNA-1	Bathymodiolus_platifrons_species_14709:Bpl_scaf_38115-0.0-mRNA-1	Bathymodiolus_platifrons_species_4219:Bpl_scaf_45908-6.2-mRNA-1	Bathymodiolus_platifrons_species_825:Bpl_scaf_58886-2.0-mRNA-1
group69774	species_special	Lottia_gigantea_species_rna-XM_009065407.1
group52559	species_special	Corbicula_fluminea_species_EVM0036888.1
group63218	species_special	Lottia_gigantea_species_rna-XM_009049898.1
group34058	species_special	Bathymodiolus_platifrons_species_2088:Bpl_scaf_2733-2.9-mRNA-1
group16661	other_ortholog	Corbicula_fluminea_species_EVM0011189.2	Bathymodiolus_platifrons_species_3160:Bpl_scaf_41893-1.8-mRNA-1	Bathymodiolus_platifrons_species_3160:Bpl_scaf_41893-2.20-mRNA-1
group55693	species_special	Crassostrea_gigas_species_EVM0012433.1
group28851	species_special	Crassostrea_gigas_species_EVM0030701.3	Crassostrea_gigas_species_EVM0006488.1
group17782	species_special	Corbicula_fluminea_species_EVM0028970.1	Corbicula_fluminea_species_EVM0009339.1	Corbicula_fluminea_species_EVM0018843.1
group25484	species_special	Corbicula_fluminea_species_EVM0006481.1	Corbicula_fluminea_species_EVM0033646.1
group49501	species_special	Corbicula_fluminea_species_EVM0007712.1
group10069	species_special	Bathymodiolus_platifrons_species_9331:Bpl_scaf_11586-15.12-mRNA-1	Bathymodiolus_platifrons_species_3138:Bpl_scaf_28712-8.3-mRNA-1	Bathymodiolus_platifrons_species_18290:Bpl_scaf_43006-0.5-mRNA-1	Bathymodiolus_platifrons_species_14082:Bpl_scaf_41228-0.13-mRNA-1	Bathymodiolus_platifrons_species_10353:Bpl_scaf_34230-0.0-mRNA-1
group23084	species_special	Bathymodiolus_platifrons_species_8279:Bpl_scaf_40962-6.2-mRNA-1	Bathymodiolus_platifrons_species_12389:Bpl_scaf_51665-0.0-mRNA-1
group51861	species_special	Corbicula_fluminea_species_EVM0005912.2
group56260	species_special	Crassostrea_gigas_species_EVM0025430.2
group30030	species_special	Crassostrea_virginica_species_rna-XM_022472321.1	Crassostrea_virginica_species_rna-XM_022467235.1
group13706	species_special	Corbicula_fluminea_species_EVM0019156.1	Corbicula_fluminea_species_EVM0008797.1	Corbicula_fluminea_species_EVM0038044.1	Corbicula_fluminea_species_EVM0018859.1
group45543	species_special	Corbicula_fluminea_species_EVM0037552.1
group39620	species_special	Bathymodiolus_platifrons_species_13904:Bpl_scaf_59079-18.1-mRNA-1
group49566	species_special	Corbicula_fluminea_species_EVM0023493.1
group32452	species_special	Bathymodiolus_platifrons_species_5627:Bpl_scaf_17465-2.7-mRNA-1
group56213	species_special	Crassostrea_gigas_species_EVM0051462.1
group39496	species_special	Bathymodiolus_platifrons_species_6059:Bpl_scaf_58266-9.19-mRNA-1
group31183	species_special	Lottia_gigantea_species_rna-XM_009068839.1	Lottia_gigantea_species_rna-XM_009068857.1
group56762	species_special	Crassostrea_gigas_species_EVM0049614.1
group16839	species_special	Bathymodiolus_platifrons_species_8449:Bpl_scaf_28609-4.36-mRNA-1	Bathymodiolus_platifrons_species_9664:Bpl_scaf_35200-0.13-mRNA-1	Bathymodiolus_platifrons_species_15682:Bpl_scaf_49891-0.5-mRNA-1
group2122	other_ortholog	Crassostrea_gigas_species_EVM0057487.1	Crassostrea_gigas_species_EVM0003008.1	Crassostrea_virginica_species_rna-XM_022482234.1	Crassostrea_virginica_species_rna-XM_022482193.1	Crassostrea_virginica_species_rna-XM_022482223.1	Crassostrea_virginica_species_rna-XM_022482273.1	Crassostrea_virginica_species_rna-XM_022482265.1	Crassostrea_virginica_species_rna-XM_022482186.1	Crassostrea_virginica_species_rna-XM_022482202.1	Crassostrea_virginica_species_rna-XM_022482256.1	Crassostrea_virginica_species_rna-XM_022482245.1	Crassostrea_virginica_species_rna-XM_022482212.1
group64886	species_special	Lottia_gigantea_species_rna-XM_009053772.1
group1937	other_ortholog	Bathymodiolus_platifrons_species_14775:Bpl_scaf_24592-3.5-mRNA-1	Crassostrea_virginica_species_rna-XM_022431966.1	Crassostrea_virginica_species_rna-XM_022431963.1	Crassostrea_virginica_species_rna-XM_022431964.1	Crassostrea_virginica_species_rna-XM_022431968.1	Crassostrea_virginica_species_rna-XM_022431970.1	Crassostrea_virginica_species_rna-XM_022431965.1	Crassostrea_virginica_species_rna-XM_022431967.1	Crassostrea_gigas_species_EVM0058183.1	Crassostrea_virginica_species_rna-XM_022431969.1	Corbicula_fluminea_species_EVM0023368.1	Crassostrea_gigas_species_EVM0025631.2
group70007	species_special	Lottia_gigantea_species_rna-XM_009066005.1
group13295	other_ortholog	Bathymodiolus_platifrons_species_1510:Bpl_scaf_43972-3.22-mRNA-1	Crassostrea_virginica_species_rna-XM_022435462.1	Crassostrea_gigas_species_EVM0006567.1	Crassostrea_gigas_species_EVM0048736.1
group23634	species_special	Bathymodiolus_platifrons_species_8713:Bpl_scaf_62500-6.15-mRNA-1	Bathymodiolus_platifrons_species_8713:Bpl_scaf_62500-7.7-mRNA-1
group10674	other_ortholog	Bathymodiolus_platifrons_species_2916:Bpl_scaf_44428-7.9-mRNA-1	Corbicula_fluminea_species_EVM0022775.1	Crassostrea_virginica_species_rna-XM_022480087.1	Crassostrea_gigas_species_EVM0014166.1	Crassostrea_gigas_species_EVM0045445.1
group29796	species_special	Crassostrea_virginica_species_rna-XM_022475038.1	Crassostrea_virginica_species_rna-XM_022475029.1
group22579	other_ortholog	Bathymodiolus_platifrons_species_12286:Bpl_scaf_2517-0.45-mRNA-1	Corbicula_fluminea_species_EVM0000091.1
group8655	multi_ortholog	Bathymodiolus_platifrons_species_5906:Bpl_scaf_60986-4.8-mRNA-1	Crassostrea_gigas_species_EVM0054344.1	Crassostrea_gigas_species_EVM0007129.1	Crassostrea_virginica_species_rna-XM_022474953.1	Corbicula_fluminea_species_EVM0019668.1	Lottia_gigantea_species_rna-XM_009056573.1
group56484	species_special	Crassostrea_gigas_species_EVM0044051.1
group18083	other_ortholog	Crassostrea_virginica_species_rna-XM_022468927.1	Corbicula_fluminea_species_EVM0010180.1	Crassostrea_gigas_species_EVM0021666.3
group50530	species_special	Corbicula_fluminea_species_EVM0005104.1
group41281	species_special	Bathymodiolus_platifrons_species_3663:Bpl_scaf_9316-3.10-mRNA-1
group14765	other_ortholog	Crassostrea_gigas_species_EVM0005850.1	Crassostrea_gigas_species_EVM0021566.1	Crassostrea_virginica_species_rna-XM_022483772.1	Crassostrea_virginica_species_rna-XM_022483773.1
group24656	species_special	Corbicula_fluminea_species_EVM0010256.1	Corbicula_fluminea_species_EVM0000397.1
group62493	species_special	Lottia_gigantea_species_rna-XM_009048338.1
group43291	species_special	Corbicula_fluminea_species_EVM0025229.1
group55751	species_special	Crassostrea_gigas_species_EVM0025166.1
group6367	other_ortholog	Bathymodiolus_platifrons_species_4406:Bpl_scaf_817-3.5-mRNA-1	Crassostrea_virginica_species_rna-XM_022489732.1	Crassostrea_virginica_species_rna-XM_022456868.1	Crassostrea_gigas_species_EVM0024221.1	Crassostrea_gigas_species_EVM0027020.1	Crassostrea_gigas_species_EVM0041685.1	Crassostrea_gigas_species_EVM0056663.1
group4069	multi_ortholog	Bathymodiolus_platifrons_species_730:Bpl_scaf_16961-4.16-mRNA-1	Corbicula_fluminea_species_EVM0004662.1	Corbicula_fluminea_species_EVM0023008.1	Crassostrea_gigas_species_EVM0041731.1	Crassostrea_virginica_species_rna-XM_022440672.1	Crassostrea_virginica_species_rna-XM_022443860.1	Crassostrea_gigas_species_EVM0043921.1	Lottia_gigantea_species_rna-XM_009065892.1
group70801	species_special	Lottia_gigantea_species_rna-XM_009067827.1
group29532	species_special	Crassostrea_gigas_species_EVM0050723.1	Crassostrea_gigas_species_EVM0037701.1
group38366	species_special	Bathymodiolus_platifrons_species_9888:Bpl_scaf_53149-3.10-mRNA-1
group36354	species_special	Bathymodiolus_platifrons_species_10814:Bpl_scaf_41157-2.1-mRNA-1
group19035	other_ortholog	Crassostrea_gigas_species_EVM0047976.1	Crassostrea_gigas_species_EVM0014857.1	Crassostrea_virginica_species_rna-XM_022475740.1
group70308	species_special	Lottia_gigantea_species_rna-XM_009066762.1
group50203	species_special	Corbicula_fluminea_species_EVM0007226.1
group36077	species_special	Bathymodiolus_platifrons_species_13934:Bpl_scaf_39700-2.15-mRNA-1
group1267	other_ortholog	Crassostrea_virginica_species_rna-XM_022448280.1	Corbicula_fluminea_species_EVM0000715.1	Crassostrea_virginica_species_rna-XM_022447976.1	Crassostrea_virginica_species_rna-XM_022453480.1	Crassostrea_virginica_species_rna-XM_022484713.1	Crassostrea_gigas_species_EVM0013500.1	Crassostrea_gigas_species_EVM0049472.1	Crassostrea_gigas_species_EVM0020725.1	Crassostrea_gigas_species_EVM0044728.1	Crassostrea_gigas_species_EVM0016560.1	Crassostrea_gigas_species_EVM0020688.1	Crassostrea_gigas_species_EVM0043867.1	Crassostrea_gigas_species_EVM0043170.1	Crassostrea_gigas_species_EVM0010105.1	Crassostrea_virginica_species_rna-XM_022455379.1
group25804	species_special	Corbicula_fluminea_species_EVM0019717.1	Corbicula_fluminea_species_EVM0012486.1
group19173	other_ortholog	Crassostrea_gigas_species_EVM0035034.1	Crassostrea_virginica_species_rna-XM_022484110.1	Crassostrea_gigas_species_EVM0037741.1
group25560	species_special	Corbicula_fluminea_species_EVM0021695.1	Corbicula_fluminea_species_EVM0006861.1
group52007	species_special	Corbicula_fluminea_species_EVM0030190.1
group49826	species_special	Corbicula_fluminea_species_EVM0020740.4
group9548	other_ortholog	Crassostrea_gigas_species_EVM0012383.1	Crassostrea_gigas_species_EVM0023377.1	Crassostrea_virginica_species_rna-XM_022436394.1	Crassostrea_virginica_species_rna-XM_022435333.1	Crassostrea_virginica_species_rna-XM_022439704.1	Crassostrea_virginica_species_rna-XM_022439705.1
group43390	species_special	Corbicula_fluminea_species_EVM0021942.1
group16360	species_special	Lottia_gigantea_species_rna-XM_009061950.1	Lottia_gigantea_species_rna-XM_009061952.1	Lottia_gigantea_species_rna-XM_009061951.1	Lottia_gigantea_species_rna-XM_009061953.1
group8182	multi_ortholog	Bathymodiolus_platifrons_species_16969:Bpl_scaf_45382-2.5-mRNA-1	Crassostrea_virginica_species_rna-XM_022484787.1	Crassostrea_gigas_species_EVM0030195.1	Crassostrea_gigas_species_EVM0003430.1	Lottia_gigantea_species_rna-XM_009067424.1	Corbicula_fluminea_species_EVM0018656.1
group15744	other_ortholog	Crassostrea_gigas_species_EVM0049095.3	Crassostrea_gigas_species_EVM0025708.1	Crassostrea_virginica_species_rna-XM_022451514.1	Crassostrea_virginica_species_rna-XM_022451515.1
group65076	species_special	Lottia_gigantea_species_rna-XM_009054188.1
group11262	species_special	Corbicula_fluminea_species_EVM0019587.1	Corbicula_fluminea_species_EVM0031685.1	Corbicula_fluminea_species_EVM0009286.1	Corbicula_fluminea_species_EVM0037410.1	Corbicula_fluminea_species_EVM0008013.1
group23586	species_special	Bathymodiolus_platifrons_species_10017:Bpl_scaf_59687-0.4-mRNA-1	Bathymodiolus_platifrons_species_7463:Bpl_scaf_62840-1.14-mRNA-1
group31479	species_special	Bathymodiolus_platifrons_species_10365:Bpl_scaf_11798-0.6-mRNA-1
group40949	species_special	Bathymodiolus_platifrons_species_12596:Bpl_scaf_713-3.3-mRNA-1
group17392	species_special	Corbicula_fluminea_species_EVM0034353.1	Corbicula_fluminea_species_EVM0028376.1	Corbicula_fluminea_species_EVM0021511.1
group47894	species_special	Corbicula_fluminea_species_EVM0018217.1
group39550	species_special	Bathymodiolus_platifrons_species_14143:Bpl_scaf_58750-0.31-mRNA-1
group39265	species_special	Bathymodiolus_platifrons_species_2780:Bpl_scaf_57026-1.7-mRNA-1
group27037	species_special	Crassostrea_gigas_species_EVM0026116.1	Crassostrea_gigas_species_EVM0055076.1
group30930	species_special	Lottia_gigantea_species_rna-XM_009055346.1	Lottia_gigantea_species_rna-XM_009055347.1
group31797	species_special	Bathymodiolus_platifrons_species_10041:Bpl_scaf_13986-2.9-mRNA-1
group8013	multi_ortholog	Bathymodiolus_platifrons_species_7561:Bpl_scaf_38716-1.7-mRNA-1	Crassostrea_virginica_species_rna-XM_022465158.1	Crassostrea_gigas_species_EVM0008072.1	Crassostrea_gigas_species_EVM0030467.1	Corbicula_fluminea_species_EVM0022250.1	Lottia_gigantea_species_rna-XM_009067529.1
group50434	species_special	Corbicula_fluminea_species_EVM0006383.1
group61972	species_special	Lottia_gigantea_species_rna-XM_009047145.1
group25244	species_special	Corbicula_fluminea_species_EVM0033742.1	Corbicula_fluminea_species_EVM0032227.1
group24052	species_special	Corbicula_fluminea_species_EVM0000096.1	Corbicula_fluminea_species_EVM0006903.1
group36310	species_special	Bathymodiolus_platifrons_species_10412:Bpl_scaf_41094-4.9-mRNA-1
group11784	other_ortholog	Crassostrea_gigas_species_EVM0023841.1	Crassostrea_gigas_species_EVM0057905.1	Crassostrea_virginica_species_rna-XM_022473666.1	Crassostrea_virginica_species_rna-XM_022473668.1	Crassostrea_virginica_species_rna-XM_022473667.1
group52437	species_special	Corbicula_fluminea_species_EVM0014974.1
group42525	species_special	Corbicula_fluminea_species_EVM0028309.1
group30808	species_special	Lottia_gigantea_species_rna-XM_009051432.1	Lottia_gigantea_species_rna-XM_009054006.1
group26313	other_ortholog	Corbicula_fluminea_species_EVM0034283.1	Lottia_gigantea_species_rna-XM_009063112.1
group31339	species_special	Bathymodiolus_platifrons_species_3471:Bpl_scaf_10772-1.10-mRNA-1
group3646	species_special	Corbicula_fluminea_species_EVM0000365.1	Corbicula_fluminea_species_EVM0005141.1	Corbicula_fluminea_species_EVM0007822.1	Corbicula_fluminea_species_EVM0005079.1	Corbicula_fluminea_species_EVM0022184.2	Corbicula_fluminea_species_EVM0034908.1	Corbicula_fluminea_species_EVM0026902.2	Corbicula_fluminea_species_EVM0024797.1	Corbicula_fluminea_species_EVM0022201.1
group20360	other_ortholog	Crassostrea_gigas_species_EVM0040104.2	Crassostrea_gigas_species_EVM0021844.1	Crassostrea_virginica_species_rna-XM_022467728.1
group7480	multi_ortholog	Bathymodiolus_platifrons_species_17666:Bpl_scaf_21200-0.26-mRNA-1	Crassostrea_virginica_species_rna-XM_022484235.1	Crassostrea_gigas_species_EVM0012160.1	Corbicula_fluminea_species_EVM0017754.1	Crassostrea_gigas_species_EVM0026566.1	Lottia_gigantea_species_rna-XM_009064539.1
group52871	species_special	Corbicula_fluminea_species_EVM0013871.1
group11709	species_special	Crassostrea_gigas_species_EVM0054995.1	Crassostrea_gigas_species_EVM0000798.1	Crassostrea_gigas_species_EVM0008533.1	Crassostrea_gigas_species_EVM0016641.1	Crassostrea_gigas_species_EVM0043292.1
group58441	species_special	Crassostrea_gigas_species_EVM0038363.1
group44638	species_special	Corbicula_fluminea_species_EVM0015024.1
group58911	species_special	Crassostrea_virginica_species_rna-XM_022462250.1
group13691	species_special	Corbicula_fluminea_species_EVM0007647.1	Corbicula_fluminea_species_EVM0033982.1	Corbicula_fluminea_species_EVM0004140.1	Corbicula_fluminea_species_EVM0004164.1
group36038	species_special	Bathymodiolus_platifrons_species_15813:Bpl_scaf_3948-0.2-mRNA-1
group24739	species_special	Corbicula_fluminea_species_EVM0025905.1	Corbicula_fluminea_species_EVM0029330.1
group518	other_ortholog	Crassostrea_gigas_species_EVM0018856.1	Crassostrea_gigas_species_EVM0006476.1	Crassostrea_gigas_species_EVM0040213.1	Crassostrea_gigas_species_EVM0056740.1	Crassostrea_gigas_species_EVM0003202.1	Crassostrea_virginica_species_rna-XM_022455633.1	Crassostrea_virginica_species_rna-XM_022455630.1	Crassostrea_virginica_species_rna-XM_022455631.1	Crassostrea_virginica_species_rna-XM_022455634.1	Crassostrea_virginica_species_rna-XM_022455629.1	Crassostrea_virginica_species_rna-XM_022455635.1	Crassostrea_virginica_species_rna-XM_022456118.1	Crassostrea_gigas_species_EVM0020827.1	Crassostrea_virginica_species_rna-XM_022456117.1	Crassostrea_gigas_species_EVM0038844.2	Crassostrea_virginica_species_rna-XM_022456789.1	Crassostrea_gigas_species_EVM0024724.1	Crassostrea_virginica_species_rna-XM_022455636.1	Crassostrea_gigas_species_EVM0000607.1	Crassostrea_gigas_species_EVM0028765.1	Crassostrea_virginica_species_rna-XM_022455778.1	Crassostrea_virginica_species_rna-XM_022455779.1	Crassostrea_virginica_species_rna-XM_022455242.1
[truncated: 69,332 more rows]
[truncated: 301 more columns]
