# Supplementary material for: Dissecting the chromosome-level genome of the Asian Clam (Corbicula fluminea)
Source: Sci Rep. 2021 Jul 22;11:15021. doi: 10.1038/s41598-021-94545-2 (PMC8298618; doi:10.1038/s41598-021-94545-2)
Supplement: Supplementary file 8 — Supplementary Table S13. [file 41598_2021_94545_MOESM8_ESM.xls]

## Sheet: cafe_contraction_expansion_fami
family name	Corbicula fluminea number	ancestors number	change	type
2OG-FeII_Oxy_2	6	8	-2	contraction
AAA_6	19	22	-3	contraction
Acyl-CoA_dh_1	12	15	-3	contraction
Acyl-CoA_dh_N	11	13	-2	contraction
AF-4	0	2	-2	contraction
ALO	0	2	-2	contraction
Alpha_L_fucos	3	12	-9	contraction
Amidohydro_1	6	8	-2	contraction
Aminotran_1_2	22	25	-3	contraction
ANAPC3	3	5	-2	contraction
Anticodon_1	5	7	-2	contraction
Antistasin	10	24	-14	contraction
ArfGap	10	12	-2	contraction
Asp	2	4	-2	contraction
AT_hook	2	6	-4	contraction
Baculo_F	0	3	-3	contraction
BAR	6	8	-2	contraction
Beta-Casp	3	5	-2	contraction
BK_channel_a	3	5	-2	contraction
C8	12	15	-3	contraction
Cadherin_2	13	17	-4	contraction
Cadherin-like	0	2	-2	contraction
Carn_acyltransf	7	9	-2	contraction
CBS	15	18	-3	contraction
CDP-OH_P_transf	4	6	-2	contraction
CHGN	5	7	-2	contraction
Choline_transpo	5	7	-2	contraction
Chorein_N	4	6	-2	contraction
Complex1_LYR	4	7	-3	contraction
CPSase_L_D2	7	9	-2	contraction
DENN	7	9	-2	contraction
DHC_N2	20	23	-3	contraction
DNA_mis_repair	3	5	-2	contraction
Drf_FH3	6	8	-2	contraction
DRY_EERY	0	2	-2	contraction
Dsh_C	0	2	-2	contraction
dsrm	11	19	-8	contraction
DUF1965	0	2	-2	contraction
DUF640	0	2	-2	contraction
DUF971	0	2	-2	contraction
EF-hand_4	5	9	-4	contraction
ELO	8	12	-4	contraction
EST1	1	3	-2	contraction
Exo_endo_phos	24	32	-8	contraction
Exo_endo_phos_2	22	25	-3	contraction
Exostosin	3	5	-2	contraction
F-box-like	47	52	-5	contraction
FA	5	7	-2	contraction
Fer2	5	7	-2	contraction
FERM_C	11	16	-5	contraction
FERM_N	12	18	-6	contraction
FR47	0	3	-3	contraction
Fucosidase_C	3	8	-5	contraction
Fuseless	0	2	-2	contraction
FYVE_2	2	5	-3	contraction
Gal_Lectin	17	20	-3	contraction
GCV_T	3	5	-2	contraction
Glyco_hydro_10	4	6	-2	contraction
Glyco_hydro_18	25	30	-5	contraction
Glyco_transf_49	2	4	-2	contraction
GRAM	7	9	-2	contraction
GST_C	5	9	-4	contraction
GST_N_3	10	13	-3	contraction
Guanylate_kin	10	15	-5	contraction
HAT	0	2	-2	contraction
HEAT_2	5	10	-5	contraction
Hemopexin	9	15	-6	contraction
HMG_box	27	32	-5	contraction
HMG_box_2	3	5	-2	contraction
HNOB	5	7	-2	contraction
HtrL_YibB	0	3	-3	contraction
Hyd_WA	2	6	-4	contraction
Hydrolase_4	3	6	-3	contraction
I_LWEQ	1	3	-2	contraction
IBN_N	10	13	-3	contraction
ILEI	3	5	-2	contraction
Integrin_B_tail	2	4	-2	contraction
Kelch_4	15	25	-10	contraction
Kelch_5	3	7	-4	contraction
Kinesin	42	50	-8	contraction
L27	2	4	-2	contraction
Laminin_N	6	9	-3	contraction
Ldl_recept_b	80	89	-9	contraction
LicD	3	6	-3	contraction
Lig_chan	27	35	-8	contraction
Lig_chan-Glu_bd	22	30	-8	contraction
Linker_histone	9	15	-6	contraction
LRR_4	6	9	-3	contraction
Lustrin_cystein	2	4	-2	contraction
MAPEG	5	7	-2	contraction
MatE	0	4	-4	contraction
Methyltransf_25	6	10	-4	contraction
Methyltransf_31	6	12	-6	contraction
Methyltransf_7	0	2	-2	contraction
MFS_2	6	8	-2	contraction
MGS	1	3	-2	contraction
MutS_I	1	3	-2	contraction
MutS_II	2	4	-2	contraction
MutS_III	3	5	-2	contraction
MutS_IV	3	5	-2	contraction
Myb_DNA-bind_6	1	3	-2	contraction
MYCBPAP	1	3	-2	contraction
NCD3G	5	7	-2	contraction
Noc2	0	2	-2	contraction
Nucleoside_tran	1	3	-2	contraction
Nup188	0	2	-2	contraction
OB_NTP_bind	11	14	-3	contraction
OTCace	0	2	-2	contraction
OTCace_N	0	2	-2	contraction
PAH	2	4	-2	contraction
PAX	7	9	-2	contraction
Peptidase_M10	7	9	-2	contraction
Peptidase_M14	13	19	-6	contraction
Peptidase_M3	2	4	-2	contraction
Peptidase_S10	3	6	-3	contraction
Peroxin-3	0	2	-2	contraction
PFK	2	4	-2	contraction
PG_binding_1	3	5	-2	contraction
PHD	49	56	-7	contraction
PhoLip_ATPase_N	5	7	-2	contraction
Phytochelatin	0	2	-2	contraction
PI-PLC-X	6	8	-2	contraction
PI-PLC-Y	5	7	-2	contraction
PID	13	18	-5	contraction
PIP49_C	4	7	-3	contraction
PKD	7	9	-2	contraction
Pkinase_C	10	12	-2	contraction
POLO_box	4	7	-3	contraction
Polysacc_deac_1	3	6	-3	contraction
PTCB-BRCT	1	6	-5	contraction
PWWP	9	14	-5	contraction
PX	29	33	-4	contraction
RA	19	22	-3	contraction
Rad21_Rec8	0	2	-2	contraction
Ran_BP1	3	7	-4	contraction
RasGEF	14	17	-3	contraction
Recep_L_domain	4	10	-6	contraction
Reprolysin_2	2	4	-2	contraction
Retrotrans_gag	1	5	-4	contraction
RGS	22	25	-3	contraction
Rhomboid	5	8	-3	contraction
RPEL	5	7	-2	contraction
RRM_5	2	4	-2	contraction
RTT107_BRCT_5	0	3	-3	contraction
RUN	12	15	-3	contraction
SBP_bac_3	4	6	-2	contraction
Sec1	5	7	-2	contraction
Sec63	6	9	-3	contraction
SH3_2	23	28	-5	contraction
SHIPPO-rpt	26	29	-3	contraction
SLC12	5	9	-4	contraction
SLED	1	3	-2	contraction
Spc97_Spc98	5	7	-2	contraction
Stathmin	4	9	-5	contraction
STELLO	0	3	-3	contraction
Sugar_tr	48	68	-20	contraction
Surp	4	6	-2	contraction
Synaptobrevin	6	8	-2	contraction
TB	0	7	-7	contraction
Tektin	6	10	-4	contraction
TFIIB	2	4	-2	contraction
ThiF	11	13	-2	contraction
Thymosin	1	6	-5	contraction
Thyroglobulin_1	7	9	-2	contraction
Tim17	3	5	-2	contraction
TMEM72	0	2	-2	contraction
TPR_10	7	9	-2	contraction
TPR_8	68	75	-7	contraction
Transferrin	2	4	-2	contraction
Transket_pyr	5	7	-2	contraction
Trefoil	4	7	-3	contraction
TRP_2	5	7	-2	contraction
TUDOR	38	47	-9	contraction
UBX	10	12	-2	contraction
UDPGT	0	8	-8	contraction
V-set	10	12	-2	contraction
VIT	8	12	-4	contraction
VPS13	2	4	-2	contraction
VPS13_mid_rpt	1	4	-3	contraction
VWC	25	32	-7	contraction
WAP	23	29	-6	contraction
WH1	4	6	-2	contraction
XPG_N	4	6	-2	contraction
Yippee-Mis18	3	5	-2	contraction
zf-C2H2_4	49	55	-6	contraction
zf-C2HC	8	10	-2	contraction
zf-CCCH_2	0	8	-8	contraction
zf-H2C2_2	1	15	-14	contraction
zf-HC5HC2H_2	5	7	-2	contraction
zf-TRAF	9	11	-2	contraction
ZU5	5	7	-2	contraction
3Beta_HSD	10	7	3	expansion
4F5	2	1	1	expansion
5_nucleotid_C	7	5	2	expansion
7tm_3	33	24	9	expansion
7TM_GPCR_Srsx	2	1	1	expansion
7TM_GPCR_Srw	53	46	7	expansion
A_deaminase_N	4	2	2	expansion
A2M	34	15	19	expansion
A2M_comp	45	19	26	expansion
A2M_N	16	12	4	expansion
A2M_N_2	34	15	19	expansion
A2M_recep	32	15	17	expansion
AA_kinase	6	3	3	expansion
AAA_11	65	38	27	expansion
AAA_12	53	31	22	expansion
AAA_18	3	2	1	expansion
AAA_19	3	1	2	expansion
AAA_22	2	1	1	expansion
AAA_30	4	1	3	expansion
AAA_assoc_2	2	1	1	expansion
AAT	14	2	12	expansion
ABC2_membrane_3	21	18	3	expansion
Abi	4	2	2	expansion
Acetyltransf_10	15	3	12	expansion
Acetyltransf_7	4	1	3	expansion
Actin	40	35	5	expansion
Acyl_transf_1	17	9	8	expansion
Acyl_transf_3	17	11	6	expansion
Acylphosphatase	4	2	2	expansion
Acyltransf_C	7	5	2	expansion
Acyltransferase	18	15	3	expansion
ADAM_spacer1	20	14	6	expansion
Adap_comp_sub	13	10	3	expansion
ADH_N	26	18	8	expansion
adh_short_C2	31	22	9	expansion
ADH_zinc_N	28	21	7	expansion
ADP_ribosyl_GH	18	12	6	expansion
AhpC-TSA_2	5	3	2	expansion
Aida_C2	2	1	1	expansion
Aida_N	2	1	1	expansion
AIG1	33	28	5	expansion
AlbA_2	7	5	2	expansion
Aldose_epim	10	5	5	expansion
Alk_phosphatase	9	6	3	expansion
Alkyl_sulf_dimr	10	3	7	expansion
Alpha-amylase_C	8	3	5	expansion
Alpha-mann_mid	14	9	5	expansion
ALS2CR8	24	8	16	expansion
Amidohydro_3	7	2	5	expansion
ANF_receptor	119	87	32	expansion
Annexin	97	59	38	expansion
Anp1	8	2	6	expansion
APCDDC	3	2	1	expansion
ApeC	32	10	22	expansion
APOBEC_N	4	2	2	expansion
ApoL	10	4	6	expansion
Apolipoprotein	7	4	3	expansion
ARF7EP_C	2	1	1	expansion
Arginase	8	4	4	expansion
Arm_2	2	1	1	expansion
ART	8	1	7	expansion
Arv1	2	1	1	expansion
ASC	49	44	5	expansion
ATG27	12	5	7	expansion
ATP_bind_1	8	4	4	expansion
ATP_synt_H	2	1	1	expansion
ATP-sulfurylase	2	1	1	expansion
ATP-synt_ab_N	7	5	2	expansion
ATP-synt_F6	2	1	1	expansion
ATP12	2	1	1	expansion
Avidin	6	2	4	expansion
Avl9	3	2	1	expansion
B12-binding_2	2	1	1	expansion
BAAT_C	13	7	6	expansion
Bac_surface_Ag	2	1	1	expansion
Band_7	25	20	5	expansion
BBE	8	3	5	expansion
BCL_N	2	1	1	expansion
Bcl-2_BAD	2	1	1	expansion
BEN	18	10	8	expansion
Bestrophin	3	2	1	expansion
Beta_elim_lyase	5	2	3	expansion
Beta_helix	30	10	20	expansion
Beta-lactamase	21	17	4	expansion
BetaGal_dom4_5	2	1	1	expansion
Bile_Hydr_Trans	11	6	5	expansion
BOP1NT	3	1	2	expansion
BRCA-2_helical	2	1	1	expansion
BRCA-2_OB1	2	1	1	expansion
BRCA-2_OB3	2	1	1	expansion
BRCA2	26	7	19	expansion
BRICHOS	8	6	2	expansion
Brix	8	6	2	expansion
BTB_2	68	53	15	expansion
BTK	3	2	1	expansion
C1_4	2	1	1	expansion
C2-set_2	62	4	58	expansion
CAAP1	2	1	1	expansion
CABIT	22	12	10	expansion
CAF1-p150_C2	2	1	1	expansion
CAF1C_H4-bd	3	2	1	expansion
Calpain_III	24	18	6	expansion
Calponin	56	25	31	expansion
Calx-beta	55	46	9	expansion
CAP_GLY	18	12	6	expansion
CAP_N	7	2	5	expansion
Carb_anhydrase	27	23	4	expansion
CARD	59	45	14	expansion
CARD_2	39	10	29	expansion
CARDB	15	1	14	expansion
CARMIL_C	3	2	1	expansion
Cas1_AcylT	4	2	2	expansion
CASP_C	2	1	1	expansion
Caveolin	22	13	9	expansion
CBM_21	6	4	2	expansion
CBM_4_9	3	2	1	expansion
CBM39	2	1	1	expansion
CBM9_1	5	2	3	expansion
CCCAP	4	2	2	expansion
CCD48	3	1	2	expansion
CCDC50_N	3	2	1	expansion
CD225	34	23	11	expansion
CDC27	3	2	1	expansion
CDC73_C	2	1	1	expansion
CDI	2	1	1	expansion
CDK2AP	2	1	1	expansion
CDO_I	3	2	1	expansion
CECR6_TMEM121	18	4	14	expansion
cEGF	58	16	42	expansion
Cellulase	5	1	4	expansion
CHB_HEX	17	8	9	expansion
CHB_HEX_C	11	6	5	expansion
CHB_HEX_C_1	3	2	1	expansion
Chibby	2	1	1	expansion
Chitin_synth_2	23	18	5	expansion
Chlorophyllase2	5	2	3	expansion
Chromo	32	27	5	expansion
CIA30	3	2	1	expansion
CIDE-N	9	4	5	expansion
CKAP2_C	2	1	1	expansion
Claudin_2	19	13	6	expansion
CLCA	10	4	6	expansion
ClpS	2	1	1	expansion
Cluap1	2	1	1	expansion
CN_hydrolase	20	11	9	expansion
CNDH2_C	2	1	1	expansion
CNRIP1	2	1	1	expansion
COesterase	64	58	6	expansion
COG5	2	1	1	expansion
COG7	3	2	1	expansion
Cohesin_load	2	1	1	expansion
Collagen_mid	2	1	1	expansion
Condensation	10	3	7	expansion
Copine	20	12	8	expansion
COR	79	5	74	expansion
COX6A	2	1	1	expansion
CPSF_A	6	4	2	expansion
CRAL_TRIO	19	15	4	expansion
CRF-BP	3	1	2	expansion
CRIM	2	1	1	expansion
CRT-like	3	2	1	expansion
Cse1	3	1	2	expansion
Ctr	12	9	3	expansion
Cu_amine_oxid	23	11	12	expansion
Cu_amine_oxidN2	12	7	5	expansion
Cu_amine_oxidN3	6	1	5	expansion
Cu2_monoox_C	31	23	8	expansion
Cu2_monooxygen	29	22	7	expansion
CUE	8	6	2	expansion
Cupin_2	2	1	1	expansion
Cupin_4	2	1	1	expansion
Cupin_5	2	1	1	expansion
CwfJ_C_1	3	2	1	expansion
Cyclin_N2	2	1	1	expansion
Cys_knot	4	2	2	expansion
Cystatin	7	5	2	expansion
Cyto_heme_lyase	2	1	1	expansion
Cytochrom_B558a	3	1	2	expansion
Cytochrom_B561	16	11	5	expansion
D123	3	2	1	expansion
DAZAP2	3	2	1	expansion
DB	8	5	3	expansion
DBC1	3	2	1	expansion
DC_STAMP	11	6	5	expansion
DcpS_C	6	3	3	expansion
DDE_1	43	31	12	expansion
DDE_3	24	11	13	expansion
DDE_Tnp_1_7	40	23	17	expansion
DDE_Tnp_IS1595	6	4	2	expansion
DDRGK	2	1	1	expansion
Death	96	25	71	expansion
DED	21	15	6	expansion
Defensin_2	2	1	1	expansion
Defensin_big	2	1	1	expansion
DegT_DnrJ_EryC1	2	1	1	expansion
DERM	6	3	3	expansion
Destabilase	9	3	6	expansion
DHDPS	9	5	4	expansion
DHHA1	2	1	1	expansion
DHHC	37	31	6	expansion
DIE2_ALG10	2	1	1	expansion
Dimer_Tnp_hAT	58	33	25	expansion
DMA	3	2	1	expansion
DNA_binding_1	2	1	1	expansion
DNA_pack_C	6	1	5	expansion
DNA_pack_N	6	1	5	expansion
DNA_photolyase	7	5	2	expansion
DNA_pol_B	9	6	3	expansion
DNA_pol3_delta2	2	1	1	expansion
DNA_repr_REX1B	2	1	1	expansion
Dna2	2	1	1	expansion
DNase_NucA_NucB	3	1	2	expansion
dNK	29	5	24	expansion
DOMON	33	22	11	expansion
DOR	2	1	1	expansion
DS	8	2	6	expansion
DUF1325	2	1	1	expansion
DUF1647	18	11	7	expansion
DUF1690	2	1	1	expansion
DUF1754	2	1	1	expansion
DUF1757	2	1	1	expansion
DUF1794	2	1	1	expansion
DUF1897	3	2	1	expansion
DUF1977	2	1	1	expansion
DUF2040	2	1	1	expansion
DUF2054	2	1	1	expansion
DUF2367	5	2	3	expansion
DUF2723	2	1	1	expansion
DUF3421	3	1	2	expansion
DUF3452	3	2	1	expansion
DUF3504	76	22	54	expansion
DUF3689	2	1	1	expansion
DUF3695	3	1	2	expansion
DUF3752	2	1	1	expansion
DUF382	2	1	1	expansion
DUF3827	3	2	1	expansion
DUF4071	3	2	1	expansion
DUF4149	2	1	1	expansion
DUF4205	7	4	3	expansion
DUF4211	3	2	1	expansion
DUF4218	3	2	1	expansion
DUF4291	2	1	1	expansion
DUF4347	2	1	1	expansion
DUF4371	53	22	31	expansion
DUF4430	5	3	2	expansion
DUF4456	2	1	1	expansion
DUF4457	6	4	2	expansion
DUF4460	2	1	1	expansion
DUF4461	2	1	1	expansion
DUF4472	2	1	1	expansion
DUF4507	2	1	1	expansion
DUF4532	2	1	1	expansion
DUF4537	7	5	2	expansion
DUF4542	3	2	1	expansion
DUF4559	186	7	179	expansion
DUF4573	10	3	7	expansion
DUF4600	6	4	2	expansion
DUF4606	2	1	1	expansion
DUF4618	2	1	1	expansion
DUF4735	8	5	3	expansion
DUF4743	2	1	1	expansion
DUF4773	12	4	8	expansion
DUF4800	2	1	1	expansion
DUF4976	2	1	1	expansion
DUF563	22	11	11	expansion
DUF572	3	2	1	expansion
DUF667	6	4	2	expansion
DUF846	2	1	1	expansion
DUF872	3	2	1	expansion
DUSP	7	5	2	expansion
Dynactin_p62	4	2	2	expansion
Dynamin_N	31	25	6	expansion
Dynamitin	2	1	1	expansion
Dyp_perox	3	1	2	expansion
DZR	4	1	3	expansion
E1_DerP2_DerF2	27	15	12	expansion
EBP	5	3	2	expansion
EDR1	2	1	1	expansion
EF-hand_6	18	13	5	expansion
EGF_2	18	13	5	expansion
eIF-5a	3	2	1	expansion
ELFV_dehydrog	2	1	1	expansion
ELL	2	1	1	expansion
EMI	3	2	1	expansion
Endosulfine	2	1	1	expansion
Endotoxin_N	2	1	1	expansion
ER_lumen_recept	2	1	1	expansion
ERCC3_RAD25_C	2	1	1	expansion
Es2	3	1	2	expansion
Esterase	5	2	3	expansion
Esterase_phd	4	1	3	expansion
ETX_MTX2	7	3	4	expansion
EVE	2	1	1	expansion
Exo5	7	3	4	expansion
EXS	3	1	2	expansion
FACT-Spt16_Nlob	2	1	1	expansion
FAD_binding_3	8	5	3	expansion
FAD_binding_4	13	10	3	expansion
FAD_binding_7	9	5	4	expansion
FAD_oxidored	2	1	1	expansion
FAIM1	3	2	1	expansion
FAM101	2	1	1	expansion
FAM117	2	1	1	expansion
FAM181	3	2	1	expansion
FAM193_C	2	1	1	expansion
FAM221	6	4	2	expansion
FancD2	3	2	1	expansion
FANCI_HD1	2	1	1	expansion
FANCI_HD2	2	1	1	expansion
FANCI_S1	2	1	1	expansion
FANCI_S2	2	1	1	expansion
FANCI_S3	2	1	1	expansion
FANCI_S4	2	1	1	expansion
FANCL_C	2	1	1	expansion
Fasciclin	55	44	11	expansion
FBA	9	2	7	expansion
Fcf1	4	2	2	expansion
Fcf2	4	1	3	expansion
Fer4_21	2	1	1	expansion
FERM_M	26	18	8	expansion
FG-GAP	33	16	17	expansion
FGGY_C	10	7	3	expansion
FGGY_N	10	7	3	expansion
Fibrinogen_BP	16	3	13	expansion
Fis1_TPR_C	2	1	1	expansion
Fis1_TPR_N	2	1	1	expansion
FIST_C	2	1	1	expansion
FKBP_C	18	15	3	expansion
FLYWCH	28	9	19	expansion
FMN_red	4	1	3	expansion
FMO-like	54	28	26	expansion
Formyl_trans_C	5	3	2	expansion
Formyl_trans_N	7	5	2	expansion
Fringe	18	15	3	expansion
FTHFS	2	1	1	expansion
FtsJ	8	6	2	expansion
FYTT	3	1	2	expansion
G_glu_transpept	15	9	6	expansion
G10	2	1	1	expansion
G8	21	12	9	expansion
Gal-3-0_sulfotr	32	17	15	expansion
Gar1	3	2	1	expansion
Gate	8	5	3	expansion
GBP	51	4	47	expansion
GBP_C	25	3	22	expansion
GCD14	2	1	1	expansion
GCM	2	1	1	expansion
GDC-P	3	2	1	expansion
GFA	2	1	1	expansion
GH3	5	2	3	expansion
GIDA	2	1	1	expansion
Git3	2	1	1	expansion
GIY-YIG	5	2	3	expansion
GLE1	2	1	1	expansion
Gln-synt_C	12	4	8	expansion
Gln-synt_N	8	3	5	expansion
Globin	22	17	5	expansion
GLTT	7	1	6	expansion
Glucosamine_iso	6	4	2	expansion
Gly_transf_sug	54	11	43	expansion
Glyco_hydro_114	4	2	2	expansion
Glyco_hydro_16	14	9	5	expansion
Glyco_hydro_20	28	17	11	expansion
Glyco_hydro_20b	16	9	7	expansion
Glyco_hydro_30	7	3	4	expansion
Glyco_hydro_38	12	9	3	expansion
Glyco_hydro_38C	14	10	4	expansion
Glyco_hydro_76	2	1	1	expansion
Glyco_trans_2_3	11	3	8	expansion
Glyco_transf_18	3	2	1	expansion
Glyco_transf_41	3	2	1	expansion
Glyco_transf_92	44	18	26	expansion
Glycohydro_20b2	8	5	3	expansion
Glycolytic	3	2	1	expansion
Glycoprotein_B	6	1	5	expansion
GMC_oxred_C	19	15	4	expansion
GMC_oxred_N	20	15	5	expansion
GRDP-like	20	8	12	expansion
GSHPx	13	8	5	expansion
GST_C_2	11	6	5	expansion
GST_N_2	7	2	5	expansion
GTP_EFTU_D2	20	15	5	expansion
GWT1	2	1	1	expansion
HA2	24	18	6	expansion
Hairy_orange	24	15	9	expansion
Ham1p_like	5	2	3	expansion
HAND	2	1	1	expansion
HbrB	2	1	1	expansion
HD	14	7	7	expansion
He_PIG	2	1	1	expansion
HECT	74	47	27	expansion
Helicase_C_3	2	1	1	expansion
Helitron_like_N	19	11	8	expansion
HemolysinCabind	7	1	6	expansion
HEPN	22	8	14	expansion
Herpes_Helicase	4	1	3	expansion
Herpes_ori_bp	5	1	4	expansion
Herpes_teg_N	15	4	11	expansion
hGDE_central	2	1	1	expansion
HgmA	2	1	1	expansion
HGTP_anticodon2	2	1	1	expansion
HIN	5	1	4	expansion
HIRAN	9	3	6	expansion
Histone	82	68	14	expansion
HMG-CoA_red	2	1	1	expansion
HRM	30	24	6	expansion
HTH_23	2	1	1	expansion
HTH_38	15	1	14	expansion
HTH_psq	75	17	58	expansion
HTH_Tnp_4	58	26	32	expansion
HTH_Tnp_Tc3_2	29	8	21	expansion
HTH_Tnp_Tc5	38	16	22	expansion
HUN	2	1	1	expansion
Hus1	2	1	1	expansion
HVSL	2	1	1	expansion
Hydrolase_2	2	1	1	expansion
HYR	73	28	45	expansion
IBB	7	5	2	expansion
Ig_2	47	14	33	expansion
IgGFc_binding	72	30	42	expansion
IIGP	90	6	84	expansion
IL17	21	16	5	expansion
InaF-motif	2	1	1	expansion
Inhibitor_I29	25	15	10	expansion
Insulin	5	3	2	expansion
Integrin_alpha2	15	9	6	expansion
Ion_trans_2	45	41	4	expansion
Ipi1_N	2	1	1	expansion
IstB_IS21	6	1	5	expansion
IU_nuc_hydro	7	5	2	expansion
Jagunal	2	1	1	expansion
KAsynt_C_assoc	15	8	7	expansion
Kazal_1	17	11	6	expansion
Kdo	2	1	1	expansion
Kelch_2	8	3	5	expansion
Kelch_6	19	16	3	expansion
ketoacyl-synt	18	12	6	expansion
Ketoacyl-synt_C	24	10	14	expansion
KIAA1430	5	3	2	expansion
Kinetochor_Ybp2	2	1	1	expansion
KR	15	8	7	expansion
Laminin_G_3	35	29	6	expansion
Laminin_I	2	1	1	expansion
Lamp	5	2	3	expansion
LCCL	2	1	1	expansion
LEM	5	3	2	expansion
LigB	3	2	1	expansion
LIN52	2	1	1	expansion
Lipase_3	10	3	7	expansion
Lipase_GDSL_2	19	7	12	expansion
Lipocalin_2	9	7	2	expansion
Lipocalin_7	5	3	2	expansion
Lipoxygenase	14	11	3	expansion
LisH_2	2	1	1	expansion
LPMO_10	22	17	5	expansion
LRAT	35	14	21	expansion
LRR_9	37	32	5	expansion
Lung_7-TM_R	5	3	2	expansion
Lyase_aromatic	5	3	2	expansion
Lys	2	1	1	expansion
MA3	11	8	3	expansion
MACPF	42	11	31	expansion
Macro	146	11	135	expansion
MADF_DNA_bdg	46	15	31	expansion
MamL-1	2	1	1	expansion
MATH	8	6	2	expansion
MCM_bind	2	1	1	expansion
Med10	2	1	1	expansion
Med16	2	1	1	expansion
Med17	2	1	1	expansion
Med21	2	1	1	expansion
Med22	2	1	1	expansion
Med31	3	2	1	expansion
Meiosis_expr	2	1	1	expansion
Melibiase_2	16	6	10	expansion
Melibiase_2_C	13	5	8	expansion
Met_synt_B12	4	1	3	expansion
Metallothio	3	1	2	expansion
Methyltr_RsmB-F	9	7	2	expansion
Methyltransf_12	7	2	5	expansion
Methyltransf_22	21	18	3	expansion
Methyltransf_32	8	5	3	expansion
Methyltransf_33	3	2	1	expansion
Methyltransf_PK	2	1	1	expansion
Methyltrn_RNA_3	3	1	2	expansion
MFS_5	3	2	1	expansion
MgsA_C	2	1	1	expansion
MIB_HERC2	58	0	58	expansion
Mid2	3	1	2	expansion
MIF4G_like_2	3	1	2	expansion
MIP	29	18	11	expansion
MitoNEET_N	2	1	1	expansion
MMR_HSR1	71	31	40	expansion
MMS22L_C	3	2	1	expansion
MMS22L_N	2	1	1	expansion
Motile_Sperm	8	5	3	expansion
MOZART2	2	1	1	expansion
MRP-S27	3	2	1	expansion
MSL2-CXC	2	1	1	expansion
MTBP_C	2	1	1	expansion
MTCP1	2	1	1	expansion
Mucin-like	3	2	1	expansion
Mucin2_WxxW	31	19	12	expansion
MULE	31	15	16	expansion
Mur_ligase_M	3	2	1	expansion
Myb_DNA-bind_4	61	12	49	expansion
Myb_DNA-bind_5	60	21	39	expansion
Myosin_head	30	25	5	expansion
Na_Ca_ex	24	19	5	expansion
Na_H_Exchanger	16	13	3	expansion
Na_Pi_cotrans	17	9	8	expansion
Na_sulph_symp	20	15	5	expansion
NAAA-beta	3	2	1	expansion
NACHT	99	10	89	expansion
NAD_binding_8	9	7	2	expansion
NAPRTase	3	2	1	expansion
NB-ARC	14	5	9	expansion
Ndc80_HEC	3	1	2	expansion
Neurexophilin	8	5	3	expansion
Neuro_bHLH	2	1	1	expansion
NGF	5	2	3	expansion
NID	4	1	3	expansion
NIDO	30	14	16	expansion
NifU_N	2	1	1	expansion
NKAP	2	1	1	expansion
NMT	2	1	1	expansion
NMT_C	2	1	1	expansion
Nop10p	2	1	1	expansion
Nop14	2	1	1	expansion
Nop25	2	1	1	expansion
NosD	3	1	2	expansion
Npa1	2	1	1	expansion
NPH3	2	1	1	expansion
NRDE-2	2	1	1	expansion
NTR	11	5	6	expansion
Nuc_sug_transp	8	6	2	expansion
Nucleoporin_FG	16	6	10	expansion
Nucleoporin2	2	1	1	expansion
Nucleos_tra2_C	18	11	7	expansion
Nucleos_tra2_N	17	9	8	expansion
Nucleotid_trans	16	7	9	expansion
Nup54	2	1	1	expansion
Nup96	3	1	2	expansion
NYD-SP28	3	2	1	expansion
NYD-SP28_assoc	3	2	1	expansion
OAS1_C	4	2	2	expansion
Octopine_DH	7	5	2	expansion
OGFr_N	21	2	19	expansion
OHCU_decarbox	5	2	3	expansion
OrfB_IS605	15	1	14	expansion
OrfB_Zn_ribbon	25	1	24	expansion
Orn_Arg_deC_N	11	6	5	expansion
OTU	33	24	9	expansion
P_proprotein	30	15	15	expansion
P-mevalo_kinase	2	1	1	expansion
P53_TAD	2	1	1	expansion
PA	16	13	3	expansion
PA14	6	3	3	expansion
PAC4	2	1	1	expansion
Palm_thioest	5	3	2	expansion
PAP2	18	12	6	expansion
PAPS_reduct	4	2	2	expansion
PARP	88	51	37	expansion
Patched	37	26	11	expansion
PBP	14	5	9	expansion
PBP_like_2	3	1	2	expansion
PC4	75	7	68	expansion
PCNA_C	2	1	1	expansion
PCNA_N	2	1	1	expansion
PCRF	2	1	1	expansion
PEP_mutase	2	1	1	expansion
Peptidase_A17	24	14	10	expansion
Peptidase_C1	35	26	9	expansion
Peptidase_C13	4	2	2	expansion
Peptidase_C14	70	54	16	expansion
Peptidase_C2	28	24	4	expansion
Peptidase_C48	15	10	5	expansion
Peptidase_C54	3	2	1	expansion
Peptidase_M23	5	1	4	expansion
Peptidase_M28	20	16	4	expansion
Peptidase_M43	2	1	1	expansion
Peptidase_S21	11	1	10	expansion
Peptidase_S51	2	1	1	expansion
Peptidase_S64	2	1	1	expansion
Peptidase_S8	41	21	20	expansion
PFU	2	1	1	expansion
Phage_lysozyme	2	1	1	expansion
PhoPQ_related	4	2	2	expansion
PHTB1_C	3	2	1	expansion
PhyH	30	24	6	expansion
Phyto_Pns9_10	2	1	1	expansion
PI3K_C2	7	5	2	expansion
PI3K_p85B	4	2	2	expansion
PIF1	49	24	25	expansion
PIG-L	3	1	2	expansion
PIG-S	2	1	1	expansion
PigN	3	2	1	expansion
PIH1	8	6	2	expansion
PLAC8	21	14	7	expansion
Plectin	3	2	1	expansion
PMP22_Claudin	47	20	27	expansion
PMT	3	2	1	expansion
PMT_4TMC	4	2	2	expansion
PP-binding	24	12	12	expansion
PP1c_bdg	2	1	1	expansion
PP2C_2	2	1	1	expansion
PP2C_C	2	1	1	expansion
Prenyltrans	19	16	3	expansion
PrmA	11	8	3	expansion
Pro_isomerase	24	21	3	expansion
Prokineticin	2	1	1	expansion
Prominin	14	9	5	expansion
Propeptide_C1	3	1	2	expansion
PRP3	3	1	2	expansion
PS-DH	16	7	9	expansion
PSP	3	2	1	expansion
PTPlike_phytase	3	2	1	expansion
PTPS	4	1	3	expansion
PUA_2	2	1	1	expansion
PUL	3	2	1	expansion
QVR	5	2	3	expansion
RabGGT_insert	2	1	1	expansion
RAC_head	2	1	1	expansion
Rad50_zn_hook	2	1	1	expansion
Rad9	2	1	1	expansion
RAI16-like	7	4	3	expansion
RasGAP_C	2	1	1	expansion
RB_B	3	2	1	expansion
Rb_C	2	1	1	expansion
RBD	9	7	2	expansion
RdRP	3	2	1	expansion
Rdx	3	2	1	expansion
RecQ_Zn_bind	10	7	3	expansion
Reeler	24	19	5	expansion
Renin_r	2	1	1	expansion
Rep_fac-A_C	4	2	2	expansion
REPA_OB_2	4	2	2	expansion
Reprolysin	40	24	16	expansion
ResIII	18	9	9	expansion
REV1_C	2	1	1	expansion
RFC1	2	1	1	expansion
RhoGAP	31	21	10	expansion
Rib_hydrolayse	6	2	4	expansion
RIBIOP_C	3	2	1	expansion
Ribonuc_2-5A	4	2	2	expansion
Ribophorin_II	2	1	1	expansion
Ribosomal_L17	2	1	1	expansion
Ribosomal_L18_c	2	1	1	expansion
Ribosomal_L22	3	2	1	expansion
Ribosomal_L22e	2	1	1	expansion
Ribosomal_L37ae	2	1	1	expansion
Ribosomal_L40e	2	1	1	expansion
Ribosomal_L5e	2	1	1	expansion
Ribosomal_S19e	2	1	1	expansion
Ribosomal_S24e	2	1	1	expansion
Ribosomal_S26e	2	1	1	expansion
Ribosomal_S28e	2	1	1	expansion
Ricin_B_lectin	26	22	4	expansion
Rieske	9	6	3	expansion
Rieske_2	2	1	1	expansion
RIG-I_C-RD	17	7	10	expansion
RNA_bind	2	1	1	expansion
RNA_POL_M_15KD	3	2	1	expansion
RNA_pol_N	2	1	1	expansion
RNA_pol_Rpa2_4	2	1	1	expansion
RNA_pol_Rpb1_R	34	27	7	expansion
RNA_pol_Rpc82	3	1	2	expansion
RNase_T	28	19	9	expansion
RNase_Zc3h12a	6	3	3	expansion
Roc	84	34	50	expansion
Rotamase	2	1	1	expansion
RPE65	10	7	3	expansion
RRM_4	2	1	1	expansion
rRNA_proc-arch	6	3	3	expansion
Rrp15p	2	1	1	expansion
RtxA	24	1	23	expansion
RuvB_N	4	1	3	expansion
RVT_2	2	1	1	expansion
S-methyl_trans	15	10	5	expansion
SAA	10	1	9	expansion
Sacchrp_dh_NADP	5	3	2	expansion
SAM_2	48	39	9	expansion
SAM_decarbox	2	1	1	expansion
SapA	5	3	2	expansion
SapB_2	17	10	7	expansion
SART-1	5	3	2	expansion
SASA	9	6	3	expansion
SCAI	3	2	1	expansion
SCAN	15	5	10	expansion
SDF	17	13	4	expansion
Sec10	3	2	1	expansion
Sec39	2	1	1	expansion
Sec62	2	1	1	expansion
SecA_DEAD	3	1	2	expansion
Sel1	49	36	13	expansion
Sen15	3	1	2	expansion
Septin	16	12	4	expansion
SERTA	7	2	5	expansion
SET	67	47	20	expansion
SGL	22	9	13	expansion
SH3_3	4	2	2	expansion
SH3_9	56	27	29	expansion
SIN1_PH	2	1	1	expansion
SLIDE	2	1	1	expansion
Slx4	2	1	1	expansion
Smg4_UPF3	3	1	2	expansion
SOR_SNZ	2	1	1	expansion
SOXp	3	2	1	expansion
SPAR_C	2	1	1	expansion
SPATA6	2	1	1	expansion
Spec3	7	5	2	expansion
Spin-Ssty	11	1	10	expansion
SPO22	2	1	1	expansion
SprT-like	5	3	2	expansion
SPX	5	3	2	expansion
SRP-alpha_N	2	1	1	expansion
SRP19	2	1	1	expansion
Ssl1	3	1	2	expansion
Stanniocalcin	4	2	2	expansion
STAS	20	13	7	expansion
Stealth_CR1	3	1	2	expansion
Stealth_CR2	3	2	1	expansion
Stealth_CR3	3	1	2	expansion
Stealth_CR4	2	1	1	expansion
STT3	4	2	2	expansion
Succ_DH_flav_C	2	1	1	expansion
Sulfate_transp	19	15	4	expansion
Sulfotransfer_1	109	34	75	expansion
Sulfotransfer_2	40	32	8	expansion
SWIM	12	5	7	expansion
SynMuv_product	2	1	1	expansion
TAF6_C	3	2	1	expansion
TAFII55_N	2	1	1	expansion
TauD	11	8	3	expansion
TBP	21	8	13	expansion
Tcf25	2	1	1	expansion
Tctex-1	21	18	3	expansion
Telomere_reg-2	2	1	1	expansion
TerD	2	1	1	expansion
Tetraspannin	68	58	10	expansion
TFIID_20kDa	2	1	1	expansion
TFIID_30kDa	2	1	1	expansion
TFIIF_beta	3	2	1	expansion
TFR_dimer	13	7	6	expansion
TH1	2	1	1	expansion
THAP	51	43	8	expansion
Thaumatin	6	1	5	expansion
THF_DHG_CYH	3	2	1	expansion
Thiol-ester_cl	37	13	24	expansion
Thioredoxin_8	9	6	3	expansion
Tho2	2	1	1	expansion
Tim44	3	2	1	expansion
TIR_2	87	58	29	expansion
TLD	45	16	29	expansion
TM2	21	12	9	expansion
TMEM132D_N	2	1	1	expansion
TMEM173	16	8	8	expansion
TMEM234	2	1	1	expansion
TMEM70	3	2	1	expansion
TNF	37	17	20	expansion
Tnp_P_element	10	4	6	expansion
Tnp_zf-ribbon_2	5	3	2	expansion
Torsin	7	3	4	expansion
Tower	2	1	1	expansion
Tox-ART-HYD1	6	1	5	expansion
TPH	8	6	2	expansion
TPR_16	32	25	7	expansion
TPR_19	13	7	6	expansion
TraB	3	2	1	expansion
TRAM_LAG1_CLN8	23	14	9	expansion
Transglut_C	12	9	3	expansion
Transglut_core	39	21	18	expansion
Transglut_core2	2	1	1	expansion
Transposase_21	13	6	7	expansion
Transposase_mut	6	1	5	expansion
TRAP_beta	2	1	1	expansion
TRAPPC10	2	1	1	expansion
TRIC	2	1	1	expansion
TRM13	3	1	2	expansion
tRNA_anti-codon	8	6	2	expansion
tRNA_bind_2	3	1	2	expansion
tRNA_edit	3	2	1	expansion
TROVE	7	5	2	expansion
Trypsin	82	65	17	expansion
Trypsin_2	24	8	16	expansion
TSC22	3	1	2	expansion
TSP_3	39	22	17	expansion
TSP_C	5	3	2	expansion
Tyr_Deacylase	3	2	1	expansion
Tyrosinase	54	42	12	expansion
U-box	9	7	2	expansion
U5_2-snRNA_bdg	2	1	1	expansion
UBA	22	19	3	expansion
UBA_5	2	1	1	expansion
ubiquitin	69	53	16	expansion
Ubiquitin_3	6	3	3	expansion
UBN_AB	2	1	1	expansion
UDG	7	4	3	expansion
UEV	2	1	1	expansion
UPF0122	7	1	6	expansion
UPF0515	9	3	6	expansion
UPF0669	2	1	1	expansion
Uricase	4	2	2	expansion
Usp	38	21	17	expansion
UvrD_C_2	2	1	1	expansion
V-SNARE_C	8	6	2	expansion
VBS	13	5	8	expansion
Vitellogenin_N	13	9	4	expansion
VOMI	30	4	26	expansion
VPS11_C	2	1	1	expansion
VSP	4	1	3	expansion
VWA_3	21	17	4	expansion
W2	8	6	2	expansion
WWE	52	26	26	expansion
Wyosine_form	2	1	1	expansion
Xan_ur_permease	29	21	8	expansion
XPC-binding	2	1	1	expansion
XPG_I_2	6	2	4	expansion
XRN_N	6	2	4	expansion
XYPPX	2	1	1	expansion
YccV-like	5	3	2	expansion
YhhN	3	2	1	expansion
YqaJ	68	11	57	expansion
Zf_RING	3	2	1	expansion
zf-3CxxC	3	2	1	expansion
zf-4CXXC_R1	3	1	2	expansion
zf-BED	12	4	8	expansion
zf-C2H2_11	8	5	3	expansion
zf-C2HE	2	1	1	expansion
zf-C3Hc3H	6	4	2	expansion
zf-C4	50	42	8	expansion
zf-CCHC_2	4	2	2	expansion
zf-CDGSH	7	4	3	expansion
zf-CHCC	3	1	2	expansion
zf-CHY	4	2	2	expansion
zf-DNA_Pol	2	1	1	expansion
zf-GRF	9	7	2	expansion
zf-H2C2	13	4	9	expansion
zf-H2C2_5	29	25	4	expansion
zf-nanos	4	2	2	expansion
zf-NF-X1	28	21	7	expansion
zf-RING_10	2	1	1	expansion
zf-RING_2	56	51	5	expansion
zf-RVT	3	2	1	expansion
zf-Sec23_Sec24	8	6	2	expansion
zf-TRM13_CCCH	2	1	1	expansion
ZFYVE21_C	2	1	1	expansion
zinc_ribbon_6	3	1	2	expansion
Zn_dep_PLPC	3	1	2	expansion
Zona_pellucida	17	11	6	expansion
ZT_dimer	3	2	1	expansion
