# Supplementary material for: Dissecting the chromosome-level genome of the Asian Clam (Corbicula fluminea)
Source: Sci Rep. 2021 Jul 22;11:15021. doi: 10.1038/s41598-021-94545-2 (PMC8298618; doi:10.1038/s41598-021-94545-2)
Supplement: Supplementary file 10 — Supplementary Table S15. [file 41598_2021_94545_MOESM10_ESM.xlsx]

## Sheet: Sheet1
categories	GO.ID	Term	Annotated	Significant	Expected	classicFisher	FDR
Biological process	GO:0006508	proteolysis	458	272	144.55	< 1e-30	NA
Biological process	GO:0006915	apoptotic process	105	92	33.14	< 1e-30	NA
Biological process	GO:0008219	cell death	105	92	33.14	< 1e-30	NA
Biological process	GO:0012501	programmed cell death	105	92	33.14	< 1e-30	NA
Biological process	GO:0051260	protein homooligomerization	67	66	21.15	< 1e-30	NA
Biological process	GO:0051259	protein oligomerization	71	68	22.41	< 1e-30	NA
Biological process	GO:0010941	regulation of cell death	93	82	29.35	3.6e-30	9.612e-28
Biological process	GO:0042981	regulation of apoptotic process	93	82	29.35	3.6e-30	9.612e-28
Biological process	GO:0043067	regulation of programmed cell death	93	82	29.35	3.6e-30	9.612e-28
Biological process	GO:0006814	sodium ion transport	69	64	21.78	8.8e-27	1.7622e-24
Biological process	GO:0015672	monovalent inorganic cation transport	113	90	35.66	3.5e-26	5.607e-24
Biological process	GO:0006313	transposition, DNA-mediated	45	45	14.2	2.2e-23	2.51743e-21
Biological process	GO:0032196	transposition	45	45	14.2	2.2e-23	2.51743e-21
Biological process	GO:0000723	telomere maintenance	46	45	14.52	6.9e-22	5.5269e-20
Biological process	GO:0032200	telomere organization	46	45	14.52	6.9e-22	5.5269e-20
Biological process	GO:0060249	anatomical structure homeostasis	46	45	14.52	6.9e-22	5.5269e-20
Biological process	GO:0002376	immune system process	49	46	15.47	4.2e-20	2.71108e-18
Biological process	GO:0006955	immune response	49	46	15.47	4.2e-20	2.71108e-18
Biological process	GO:0016043	cellular component organization	321	179	101.31	4.4e-20	2.71108e-18
Biological process	GO:0071840	cellular component organization or bioge...	350	191	110.47	6e-20	3.43286e-18
Biological process	GO:0071822	protein complex subunit organization	108	78	34.09	2.9e-18	1.5486e-16
Biological process	GO:0016567	protein ubiquitination	56	49	17.67	3.7e-18	1.85231e-16
Biological process	GO:0032446	protein modification by small protein co...	57	49	17.99	1.8e-17	8.48118e-16
Biological process	GO:0006461	protein complex assembly	101	73	31.88	3.3e-17	1.39121e-15
Biological process	GO:0070271	protein complex biogenesis	101	73	31.88	3.3e-17	1.39121e-15
Biological process	GO:0006950	response to stress	150	95	47.34	6.6e-16	2.6433e-14
Biological process	GO:0008152	metabolic process	4126	1454	1302.24	8.2e-15	3.12771e-13
Biological process	GO:0006310	DNA recombination	69	52	21.78	7.5e-14	2.73068e-12
Biological process	GO:0022607	cellular component assembly	165	98	52.08	8.9e-14	3.09952e-12
Biological process	GO:0030001	metal ion transport	143	88	45.13	9.3e-14	3.10387e-12
Biological process	GO:0006812	cation transport	214	119	67.54	1.4e-13	4.4856e-12
Biological process	GO:0044085	cellular component biogenesis	194	110	61.23	2.1e-13	6.46962e-12
Biological process	GO:0000413	protein peptidyl-prolyl isomerization	24	24	7.57	8.8e-13	2.51743e-11
Biological process	GO:0018208	peptidyl-proline modification	24	24	7.57	8.8e-13	2.51743e-11
Biological process	GO:0001765	membrane raft assembly	22	22	6.94	9e-12	2.05971e-10
Biological process	GO:0031579	membrane raft organization	22	22	6.94	9e-12	2.05971e-10
Biological process	GO:0044091	membrane biogenesis	22	22	6.94	9e-12	2.05971e-10
Biological process	GO:0044854	plasma membrane raft assembly	22	22	6.94	9e-12	2.05971e-10
Biological process	GO:0044857	plasma membrane raft organization	22	22	6.94	9e-12	2.05971e-10
Biological process	GO:0070836	caveola assembly	22	22	6.94	9e-12	2.05971e-10
Biological process	GO:0071709	membrane assembly	22	22	6.94	9e-12	2.05971e-10
Biological process	GO:0007009	plasma membrane organization	25	24	7.89	1.5e-11	3.3375e-10
Biological process	GO:0043933	macromolecular complex subunit organizat...	133	79	41.98	2.3e-11	4.97919e-10
Biological process	GO:0044238	primary metabolic process	3262	1158	1029.55	5.5e-11	1.15934e-09
Biological process	GO:0065003	macromolecular complex assembly	124	74	39.14	7.4e-11	1.51985e-09
Biological process	GO:0009247	glycolipid biosynthetic process	46	36	14.52	8.5e-11	1.66061e-09
Biological process	GO:0046467	membrane lipid biosynthetic process	46	36	14.52	8.5e-11	1.66061e-09
Biological process	GO:0010256	endomembrane system organization	29	26	9.15	1.1e-10	2.09786e-09
Biological process	GO:0008272	sulfate transport	19	19	6	2.9e-10	5.27932e-09
Biological process	GO:0072348	sulfur compound transport	19	19	6	2.9e-10	5.27932e-09
Biological process	GO:0018193	peptidyl-amino acid modification	51	38	16.1	3.2e-10	5.696e-09
Biological process	GO:0006974	cellular response to DNA damage stimulus	114	68	35.98	4.5e-10	7.66915e-09
Biological process	GO:0033554	cellular response to stress	114	68	35.98	4.5e-10	7.66915e-09
Biological process	GO:0006281	DNA repair	107	64	33.77	1.3e-09	2.16937e-08
Biological process	GO:0061024	membrane organization	29	25	9.15	1.6e-09	2.61551e-08
Biological process	GO:0006664	glycolipid metabolic process	49	36	15.47	1.8e-09	2.82706e-08
Biological process	GO:1903509	liposaccharide metabolic process	49	36	15.47	1.8e-09	2.82706e-08
Biological process	GO:0071704	organic substance metabolic process	3401	1189	1073.42	3.6e-09	5.54538e-08
Biological process	GO:0006643	membrane lipid metabolic process	50	36	15.78	4.6e-09	6.95208e-08
Biological process	GO:0015698	inorganic anion transport	43	32	13.57	8.8e-09	1.30533e-07
Biological process	GO:0006013	mannose metabolic process	15	15	4.73	3e-08	4.36909e-07
Biological process	GO:0070647	protein modification by small protein co...	102	59	32.19	3.2e-08	4.57714e-07
Biological process	GO:0008202	steroid metabolic process	18	17	5.68	3.7e-08	5.19947e-07
Biological process	GO:0005975	carbohydrate metabolic process	248	117	78.27	1.3e-07	1.79534e-06
Biological process	GO:0006471	protein ADP-ribosylation	13	13	4.1	3e-07	4.07288e-06
Biological process	GO:0006351	transcription, DNA-templated	481	202	151.81	4e-07	5.25246e-06
Biological process	GO:0097659	nucleic acid-templated transcription	481	202	151.81	4e-07	5.25246e-06
Biological process	GO:0051276	chromosome organization	110	60	34.72	4.2e-07	5.42613e-06
Biological process	GO:0009308	amine metabolic process	30	23	9.47	4.7e-07	5.97571e-06
Biological process	GO:0032774	RNA biosynthetic process	484	202	152.76	6.8e-07	8.51062e-06
Biological process	GO:0006694	steroid biosynthetic process	12	12	3.79	9.6e-07	1.18302e-05
Biological process	GO:0006952	defense response	15	14	4.73	1e-06	1.19552e-05
Biological process	GO:0051239	regulation of multicellular organismal p...	15	14	4.73	1e-06	1.19552e-05
Biological process	GO:0006807	nitrogen compound metabolic process	2996	1036	945.59	2.3e-06	2.70926e-05
Biological process	GO:1901362	organic cyclic compound biosynthetic pro...	601	241	189.69	2.4e-06	2.78609e-05
Biological process	GO:0006979	response to oxidative stress	14	13	4.42	3e-06	3.38451e-05
Biological process	GO:0035434	copper ion transmembrane transport	11	11	3.47	3e-06	3.38451e-05
Biological process	GO:0008610	lipid biosynthetic process	87	48	27.46	3.9e-06	4.33875e-05
Biological process	GO:0034654	nucleobase-containing compound biosynthe...	568	228	179.27	4.2e-06	4.60849e-05
Biological process	GO:0010468	regulation of gene expression	420	175	132.56	4.5e-06	4.87095e-05
Biological process	GO:0007160	cell-matrix adhesion	49	31	15.47	4.6e-06	4.9128e-05
Biological process	GO:0010556	regulation of macromolecule biosynthetic...	417	173	131.61	7e-06	7.18846e-05
Biological process	GO:0031326	regulation of cellular biosynthetic proc...	417	173	131.61	7e-06	7.18846e-05
Biological process	GO:2000112	regulation of cellular macromolecule bio...	417	173	131.61	7e-06	7.18846e-05
Biological process	GO:1901360	organic cyclic compound metabolic proces...	1293	475	408.09	7.3e-06	7.40165e-05
Biological process	GO:0060255	regulation of macromolecule metabolic pr...	429	177	135.4	8.1e-06	7.5434e-05
Biological process	GO:0009889	regulation of biosynthetic process	418	173	131.93	8.2e-06	7.5434e-05
Biological process	GO:0031589	cell-substrate adhesion	50	31	15.78	8.5e-06	7.5434e-05
Biological process	GO:0051704	multi-organism process	18	15	5.68	8.5e-06	7.5434e-05
Biological process	GO:0001816	cytokine production	10	10	3.16	9.7e-06	7.5434e-05
Biological process	GO:0001817	regulation of cytokine production	10	10	3.16	9.7e-06	7.5434e-05
Biological process	GO:0001819	positive regulation of cytokine producti...	10	10	3.16	9.7e-06	7.5434e-05
Biological process	GO:0002218	activation of innate immune response	10	10	3.16	9.7e-06	7.5434e-05
Biological process	GO:0002253	activation of immune response	10	10	3.16	9.7e-06	7.5434e-05
Biological process	GO:0002682	regulation of immune system process	10	10	3.16	9.7e-06	7.5434e-05
Biological process	GO:0002684	positive regulation of immune system pro...	10	10	3.16	9.7e-06	7.5434e-05
Biological process	GO:0018149	peptide cross-linking	10	10	3.16	9.7e-06	7.5434e-05
Biological process	GO:0031347	regulation of defense response	10	10	3.16	9.7e-06	7.5434e-05
Biological process	GO:0031349	positive regulation of defense response	10	10	3.16	9.7e-06	7.5434e-05
Biological process	GO:0032479	regulation of type I interferon producti...	10	10	3.16	9.7e-06	7.5434e-05
Biological process	GO:0032481	positive regulation of type I interferon...	10	10	3.16	9.7e-06	7.5434e-05
Biological process	GO:0032606	type I interferon production	10	10	3.16	9.7e-06	7.5434e-05
Biological process	GO:0044341	sodium-dependent phosphate transport	10	10	3.16	9.7e-06	7.5434e-05
Biological process	GO:0045087	innate immune response	10	10	3.16	9.7e-06	7.5434e-05
Biological process	GO:0045088	regulation of innate immune response	10	10	3.16	9.7e-06	7.5434e-05
Biological process	GO:0045089	positive regulation of innate immune res...	10	10	3.16	9.7e-06	7.5434e-05
Biological process	GO:0050776	regulation of immune response	10	10	3.16	9.7e-06	7.5434e-05
Biological process	GO:0050778	positive regulation of immune response	10	10	3.16	9.7e-06	7.5434e-05
Biological process	GO:0051240	positive regulation of multicellular org...	10	10	3.16	9.7e-06	7.5434e-05
Biological process	GO:0055114	oxidation-reduction process	666	260	210.2	1.1e-05	8.47212e-05
Biological process	GO:0019222	regulation of metabolic process	432	177	136.35	1.3e-05	9.91714e-05
Biological process	GO:0019219	regulation of nucleobase-containing comp...	413	170	130.35	1.4e-05	0.000105792
Biological process	GO:0051171	regulation of nitrogen compound metaboli...	422	173	133.19	1.6e-05	0.000118667
Biological process	GO:0080090	regulation of primary metabolic process	422	173	133.19	1.6e-05	0.000118667
Biological process	GO:0006355	regulation of transcription, DNA-templat...	409	168	129.09	1.9e-05	0.000134681
Biological process	GO:0051252	regulation of RNA metabolic process	409	168	129.09	1.9e-05	0.000134681
Biological process	GO:1903506	regulation of nucleic acid-templated tra...	409	168	129.09	1.9e-05	0.000134681
Biological process	GO:2001141	regulation of RNA biosynthetic process	409	168	129.09	1.9e-05	0.000134681
Biological process	GO:0031323	regulation of cellular metabolic process	423	173	133.51	1.9e-05	0.000134681
Biological process	GO:0006139	nucleobase-containing compound metabolic...	1243	454	392.31	2.5e-05	0.00017355
Biological process	GO:0006825	copper ion transport	12	11	3.79	2.6e-05	0.00017355
Biological process	GO:0007276	gamete generation	12	11	3.79	2.6e-05	0.00017355
Biological process	GO:0019953	sexual reproduction	12	11	3.79	2.6e-05	0.00017355
Biological process	GO:0032504	multicellular organism reproduction	12	11	3.79	2.6e-05	0.00017355
Biological process	GO:0044703	multi-organism reproductive process	12	11	3.79	2.6e-05	0.00017355
Biological process	GO:0048609	multicellular organismal reproductive pr...	12	11	3.79	2.6e-05	0.00017355
Biological process	GO:0090304	nucleic acid metabolic process	1098	405	346.55	2.7e-05	0.00017727
Biological process	GO:0019438	aromatic compound biosynthetic process	584	229	184.32	2.7e-05	0.00017727
Biological process	GO:0006352	DNA-templated transcription, initiation	31	21	9.78	3.7e-05	0.000240951
Biological process	GO:0018130	heterocycle biosynthetic process	589	229	185.9	5.3e-05	0.000342363
Biological process	GO:0006725	cellular aromatic compound metabolic pro...	1274	461	402.1	6.2e-05	0.000397296
Biological process	GO:0080134	regulation of response to stress	11	10	3.47	7.6e-05	0.000483143
Biological process	GO:0032259	methylation	24	17	7.57	8.8e-05	0.000555024
Biological process	GO:0071702	organic substance transport	154	71	48.61	9.6e-05	0.000585806
Biological process	GO:0006542	glutamine biosynthetic process	8	8	2.52	9.8e-05	0.000585806
Biological process	GO:0008612	peptidyl-lysine modification to peptidyl...	8	8	2.52	9.8e-05	0.000585806
Biological process	GO:0015780	nucleotide-sugar transport	8	8	2.52	9.8e-05	0.000585806
Biological process	GO:0015781	pyrimidine nucleotide-sugar transport	8	8	2.52	9.8e-05	0.000585806
Biological process	GO:0072531	pyrimidine-containing compound transmemb...	8	8	2.52	9.8e-05	0.000585806
Biological process	GO:0090481	pyrimidine nucleotide-sugar transmembran...	8	8	2.52	9.8e-05	0.000585806
Biological process	GO:0017038	protein import	15	12	4.73	0.00016	0.000942353
Biological process	GO:0043170	macromolecule metabolic process	2766	943	873	0.00016	0.000942353
Biological process	GO:0042157	lipoprotein metabolic process	29	19	9.15	0.00017	0.000993942
Biological process	GO:0046483	heterocycle metabolic process	1272	456	401.47	0.00019	0.00109489
Biological process	GO:0034655	nucleobase-containing compound catabolic...	25	17	7.89	0.00019	0.00109489
Biological process	GO:0019318	hexose metabolic process	23	16	7.26	0.0002	0.00114429
Biological process	GO:0048518	positive regulation of biological proces...	32	20	10.1	0.0003	0.00170426
Biological process	GO:0006817	phosphate ion transport	12	10	3.79	0.00033	0.00184846
Biological process	GO:0048584	positive regulation of response to stimu...	12	10	3.79	0.00033	0.00184846
Biological process	GO:0006259	DNA metabolic process	455	177	143.61	0.00037	0.00205813
Biological process	GO:0005996	monosaccharide metabolic process	24	16	7.57	0.00042	0.00232014
Biological process	GO:1901292	nucleoside phosphate catabolic process	16	12	5.05	0.00045	0.00246884
Biological process	GO:0006869	lipid transport	40	23	12.62	0.0006	0.00326939
Biological process	GO:1901264	carbohydrate derivative transport	9	8	2.84	0.00063	0.00340966
Biological process	GO:0006813	potassium ion transport	19	13	6	0.00104	0.00559087
Biological process	GO:0000041	transition metal ion transport	15	11	4.73	0.00107	0.00569132
Biological process	GO:0000003	reproduction	17	12	5.37	0.00108	0.00569132
Biological process	GO:0022414	reproductive process	17	12	5.37	0.00108	0.00569132
Biological process	GO:0010876	lipid localization	42	23	13.26	0.0015	0.00785294
Biological process	GO:0033036	macromolecule localization	153	66	48.29	0.00155	0.00801
Biological process	GO:0006820	anion transport	64	32	20.2	0.00155	0.00801
Biological process	GO:0019439	aromatic compound catabolic process	33	19	10.42	0.00174	0.00893423
Biological process	GO:0006606	protein import into nucleus	8	7	2.52	0.0018	0.00901125
Biological process	GO:0016125	sterol metabolic process	8	7	2.52	0.0018	0.00901125
Biological process	GO:0034504	protein localization to nucleus	8	7	2.52	0.0018	0.00901125
Biological process	GO:0051170	nuclear import	8	7	2.52	0.0018	0.00901125
Cellular component	GO:0000786	nucleosome	88	80	27.79	< 1e-30	NA
Cellular component	GO:0032993	protein-DNA complex	89	80	28.11	< 1e-30	NA
Cellular component	GO:0044815	DNA packaging complex	89	80	28.11	< 1e-30	NA
Cellular component	GO:0000785	chromatin	90	80	28.43	3e-30	5.19e-28
Cellular component	GO:0044427	chromosomal part	114	88	36.01	4.2e-24	3.633e-22
Cellular component	GO:0005615	extracellular space	45	44	14.21	1.9e-21	1.09567e-19
Cellular component	GO:0005694	chromosome	124	89	39.17	1.4e-20	6.055e-19
Cellular component	GO:0044421	extracellular region part	52	44	16.42	2.5e-15	8.65e-14
Cellular component	GO:0005794	Golgi apparatus	67	51	21.16	5.6e-14	1.61467e-12
Cellular component	GO:0043229	intracellular organelle	843	356	266.26	2.5e-13	6.17857e-12
Cellular component	GO:0043226	organelle	847	356	267.52	5.7e-13	1.23262e-11
Cellular component	GO:0005622	intracellular	1053	422	332.59	1.3e-11	2.49889e-10
Cellular component	GO:0044446	intracellular organelle part	412	187	130.13	4.8e-10	8.304e-09
Cellular component	GO:0005623	cell	1080	423	341.12	6.6e-10	9.515e-09
Cellular component	GO:0044464	cell part	1080	423	341.12	6.6e-10	9.515e-09
Cellular component	GO:0044422	organelle part	415	187	131.08	1e-09	1.33077e-08
Cellular component	GO:0016459	myosin complex	29	25	9.16	1.5e-09	1.85357e-08
Cellular component	GO:0044424	intracellular part	984	387	310.8	2.9e-09	3.34467e-08
Cellular component	GO:0005576	extracellular region	217	108	68.54	8.2e-09	8.86625e-08
Cellular component	GO:0043228	non-membrane-bounded organelle	331	149	104.55	6.9e-08	6.63167e-07
Cellular component	GO:0043232	intracellular non-membrane-bounded organ...	331	149	104.55	6.9e-08	6.63167e-07
Cellular component	GO:0015629	actin cytoskeleton	41	29	12.95	2.7e-07	2.45842e-06
Cellular component	GO:0012505	endomembrane system	146	72	46.11	4.3e-06	3.7195e-05
Cellular component	GO:0043231	intracellular membrane-bounded organelle	541	214	170.87	1.7e-05	0.000140048
Cellular component	GO:0043227	membrane-bounded organelle	549	214	173.4	5.2e-05	0.000408909
Cellular component	GO:0012507	ER to Golgi transport vesicle membrane	8	8	2.53	9.8e-05	0.00067816
Cellular component	GO:0030127	COPII vesicle coat	8	8	2.53	9.8e-05	0.00067816
Cellular component	GO:0030134	COPII-coated ER to Golgi transport vesic...	8	8	2.53	9.8e-05	0.00067816
Cellular component	GO:0044431	Golgi apparatus part	37	22	11.69	0.00041	0.00272808
Molecular function	GO:0008146	sulfotransferase activity	174	174	56.96	< 1e-30	NA
Molecular function	GO:0016782	transferase activity, transferring sulfu...	176	174	57.62	< 1e-30	NA
Molecular function	GO:0004842	ubiquitin-protein transferase activity	129	124	42.23	< 1e-30	NA
Molecular function	GO:0019787	ubiquitin-like protein transferase activ...	129	124	42.23	< 1e-30	NA
Molecular function	GO:0004252	serine-type endopeptidase activity	136	128	44.52	< 1e-30	NA
Molecular function	GO:0003950	NAD+ ADP-ribosyltransferase activity	88	88	28.81	< 1e-30	NA
Molecular function	GO:0016763	transferase activity, transferring pento...	101	96	33.06	< 1e-30	NA
Molecular function	GO:0008236	serine-type peptidase activity	158	131	51.72	< 1e-30	NA
Molecular function	GO:0017171	serine hydrolase activity	158	131	51.72	< 1e-30	NA
Molecular function	GO:0004175	endopeptidase activity	296	202	96.9	< 1e-30	NA
Molecular function	GO:0001882	nucleoside binding	479	287	156.81	< 1e-30	NA
Molecular function	GO:0001883	purine nucleoside binding	477	285	156.16	< 1e-30	NA
Molecular function	GO:0005525	GTP binding	477	285	156.16	< 1e-30	NA
Molecular function	GO:0032549	ribonucleoside binding	477	285	156.16	< 1e-30	NA
Molecular function	GO:0032550	purine ribonucleoside binding	477	285	156.16	< 1e-30	NA
Molecular function	GO:0032561	guanyl ribonucleotide binding	477	285	156.16	< 1e-30	NA
Molecular function	GO:0019001	guanyl nucleotide binding	489	285	160.08	< 1e-30	NA
Molecular function	GO:0008233	peptidase activity	476	268	155.83	3.5e-27	1.638e-24
Molecular function	GO:0004386	helicase activity	91	79	29.79	9e-27	2.028e-24
Molecular function	GO:0070011	peptidase activity, acting on L-amino ac...	463	261	151.57	1.3e-26	2.028e-24
Molecular function	GO:0001653	peptide receptor activity	50	50	16.37	4.6e-25	4.3056e-23
Molecular function	GO:0008528	G-protein coupled peptide receptor activ...	50	50	16.37	4.6e-25	4.3056e-23
Molecular function	GO:0003677	DNA binding	818	404	267.79	1.2e-24	9.36e-23
Molecular function	GO:0003824	catalytic activity	4543	1735	1487.24	3.2e-23	2.13943e-21
Molecular function	GO:0004497	monooxygenase activity	66	60	21.61	5.4e-23	3.159e-21
Molecular function	GO:0005272	sodium channel activity	46	45	15.06	4e-21	1.872e-19
Molecular function	GO:0015081	sodium ion transmembrane transporter act...	46	45	15.06	4e-21	1.872e-19
Molecular function	GO:0050660	flavin adenine dinucleotide binding	86	70	28.15	1.5e-20	6.24e-19
Molecular function	GO:0015077	monovalent inorganic cation transmembran...	93	74	30.45	1.6e-20	6.24e-19
Molecular function	GO:0005126	cytokine receptor binding	36	36	11.79	3.1e-18	9.672e-17
Molecular function	GO:0005164	tumor necrosis factor receptor binding	36	36	11.79	3.1e-18	9.672e-17
Molecular function	GO:0032813	tumor necrosis factor receptor superfami...	36	36	11.79	3.1e-18	9.672e-17
Molecular function	GO:0003678	DNA helicase activity	59	51	19.31	1.5e-17	4.3875e-16
Molecular function	GO:0005261	cation channel activity	63	53	20.62	4.3e-17	1.18376e-15
Molecular function	GO:0016740	transferase activity	1551	650	507.75	3.2e-16	8.32e-15
Molecular function	GO:0004499	N,N-dimethylaniline monooxygenase activi...	31	31	10.15	8.5e-16	2.09368e-14
Molecular function	GO:0008234	cysteine-type peptidase activity	127	85	41.58	2.4e-15	5.616e-14
Molecular function	GO:0001733	galactosylceramide sulfotransferase acti...	29	29	9.49	8.1e-15	1.64817e-13
Molecular function	GO:0016715	oxidoreductase activity, acting on paire...	29	29	9.49	8.1e-15	1.64817e-13
Molecular function	GO:0050694	galactose 3-O-sulfotransferase activity	29	29	9.49	8.1e-15	1.64817e-13
Molecular function	GO:0016709	oxidoreductase activity, acting on paire...	32	31	10.48	1.9e-14	3.705e-13
Molecular function	GO:0016798	hydrolase activity, acting on glycosyl b...	161	99	52.71	5e-14	9.36e-13
Molecular function	GO:0004197	cysteine-type endopeptidase activity	30	29	9.82	1.7e-13	3.06e-12
Molecular function	GO:0015291	secondary active transmembrane transport...	33	31	10.8	2.1e-13	3.47226e-12
Molecular function	GO:0005102	receptor binding	107	72	35.03	2.2e-13	3.47226e-12
Molecular function	GO:0003755	peptidyl-prolyl cis-trans isomerase acti...	26	26	8.51	2.3e-13	3.47226e-12
Molecular function	GO:0004198	calcium-dependent cysteine-type endopept...	26	26	8.51	2.3e-13	3.47226e-12
Molecular function	GO:0016859	cis-trans isomerase activity	26	26	8.51	2.3e-13	3.47226e-12
Molecular function	GO:0004553	hydrolase activity, hydrolyzing O-glycos...	149	92	48.78	2.8e-13	4.095e-12
Molecular function	GO:0005544	calcium-dependent phospholipid binding	25	25	8.18	7.1e-13	1.00691e-11
Molecular function	GO:0050661	NADP binding	37	32	12.11	1.8e-11	2.47765e-10
Molecular function	GO:0005125	cytokine activity	21	21	6.87	6.3e-11	8.19e-10
Molecular function	GO:0008131	primary amine oxidase activity	21	21	6.87	6.3e-11	8.19e-10
Molecular function	GO:0005507	copper ion binding	73	51	23.9	8.4e-11	1.06249e-09
Molecular function	GO:0022890	inorganic cation transmembrane transport...	146	85	47.8	1.8e-10	2.21684e-09
Molecular function	GO:0046983	protein dimerization activity	163	92	53.36	3.2e-10	3.84e-09
Molecular function	GO:0016638	oxidoreductase activity, acting on the C...	26	24	8.51	3.4e-10	3.978e-09
Molecular function	GO:0015116	sulfate transmembrane transporter activi...	19	19	6.22	5.9e-10	6.57429e-09
Molecular function	GO:1901682	sulfur compound transmembrane transporte...	19	19	6.22	5.9e-10	6.57429e-09
Molecular function	GO:0004866	endopeptidase inhibitor activity	70	48	22.92	8.3e-10	8.82818e-09
Molecular function	GO:0061135	endopeptidase regulator activity	70	48	22.92	8.3e-10	8.82818e-09
Molecular function	GO:0016641	oxidoreductase activity, acting on the C...	22	21	7.2	9.6e-10	9.76696e-09
Molecular function	GO:0048038	quinone binding	22	21	7.2	9.6e-10	9.76696e-09
Molecular function	GO:0015103	inorganic anion transmembrane transporte...	41	32	13.42	3.2e-09	3.18638e-08
Molecular function	GO:0004803	transposase activity	16	16	5.24	1.7e-08	1.62367e-07
Molecular function	GO:0015293	symporter activity	16	16	5.24	1.7e-08	1.62367e-07
Molecular function	GO:0008324	cation transmembrane transporter activit...	169	90	55.33	2.4e-08	2.2464e-07
Molecular function	GO:0046873	metal ion transmembrane transporter acti...	106	62	34.7	4e-08	3.67059e-07
Molecular function	GO:0016757	transferase activity, transferring glyco...	316	149	103.45	4.9e-08	4.41e-07
Molecular function	GO:0015297	antiporter activity	15	15	4.91	5.2e-08	4.42473e-07
Molecular function	GO:0015298	solute:cation antiporter activity	15	15	4.91	5.2e-08	4.42473e-07
Molecular function	GO:0015299	solute:proton antiporter activity	15	15	4.91	5.2e-08	4.42473e-07
Molecular function	GO:0140097	catalytic activity, acting on DNA	144	78	47.14	8e-08	6.68571e-07
Molecular function	GO:0043531	ADP binding	14	14	4.58	1.6e-07	1.29103e-06
Molecular function	GO:0051537	2 iron, 2 sulfur cluster binding	14	14	4.58	1.6e-07	1.29103e-06
Molecular function	GO:0008509	anion transmembrane transporter activity	46	32	15.06	3.3e-07	2.61763e-06
Molecular function	GO:0004602	glutathione peroxidase activity	13	13	4.26	4.9e-07	3.822e-06
Molecular function	GO:0050662	coenzyme binding	155	80	50.74	7.9e-07	6.06098e-06
Molecular function	GO:0004356	glutamate-ammonia ligase activity	12	12	3.93	1.5e-06	1.09688e-05
Molecular function	GO:0016211	ammonia ligase activity	12	12	3.93	1.5e-06	1.09688e-05
Molecular function	GO:0016880	acid-ammonia (or amide) ligase activity	12	12	3.93	1.5e-06	1.09688e-05
Molecular function	GO:0016853	isomerase activity	67	41	21.93	1.6e-06	1.152e-05
Molecular function	GO:0016702	oxidoreductase activity, acting on singl...	41	28	13.42	3.3e-06	2.34e-05
Molecular function	GO:0004601	peroxidase activity	17	15	5.57	3.4e-06	2.37493e-05
Molecular function	GO:0003796	lysozyme activity	11	11	3.6	4.6e-06	3.12e-05
Molecular function	GO:0005375	copper ion transmembrane transporter act...	11	11	3.6	4.6e-06	3.12e-05
Molecular function	GO:0016787	hydrolase activity	1860	692	608.91	5.4e-06	3.61029e-05
Molecular function	GO:0016701	oxidoreductase activity, acting on singl...	42	28	13.75	6.8e-06	4.42e-05
Molecular function	GO:0051213	dioxygenase activity	42	28	13.75	6.8e-06	4.42e-05
Molecular function	GO:0016746	transferase activity, transferring acyl ...	84	47	27.5	9.3e-06	5.96219e-05
Molecular function	GO:0003854	3-beta-hydroxy-delta5-steroid dehydrogen...	10	10	3.27	1.4e-05	8.29367e-05
Molecular function	GO:0015114	phosphate ion transmembrane transporter ...	10	10	3.27	1.4e-05	8.29367e-05
Molecular function	GO:0015321	sodium-dependent phosphate transmembrane...	10	10	3.27	1.4e-05	8.29367e-05
Molecular function	GO:0016229	steroid dehydrogenase activity	10	10	3.27	1.4e-05	8.29367e-05
Molecular function	GO:0033764	steroid dehydrogenase activity, acting o...	10	10	3.27	1.4e-05	8.29367e-05
Molecular function	GO:1901677	phosphate transmembrane transporter acti...	10	10	3.27	1.4e-05	8.29367e-05
Molecular function	GO:0030414	peptidase inhibitor activity	94	50	30.77	3.2e-05	0.000184889
Molecular function	GO:0061134	peptidase regulator activity	94	50	30.77	3.2e-05	0.000184889
Molecular function	GO:0004559	alpha-mannosidase activity	21	16	6.87	5.6e-05	0.000315759
Molecular function	GO:0015923	mannosidase activity	21	16	6.87	5.6e-05	0.000315759
Molecular function	GO:0004857	enzyme inhibitor activity	102	52	33.39	9.8e-05	0.000546
Molecular function	GO:0003956	NAD(P)+-protein-arginine ADP-ribosyltran...	8	8	2.62	0.00013	0.00069931
Molecular function	GO:0005338	nucleotide-sugar transmembrane transport...	8	8	2.62	0.00013	0.00069931
Molecular function	GO:0015165	pyrimidine nucleotide-sugar transmembran...	8	8	2.62	0.00013	0.00069931
Molecular function	GO:0030545	receptor regulator activity	50	29	16.37	0.0002	0.00105169
Molecular function	GO:0048018	receptor ligand activity	50	29	16.37	0.0002	0.00105169
Molecular function	GO:0008289	lipid binding	90	46	29.46	0.00022	0.001144
Molecular function	GO:0003810	protein-glutamine gamma-glutamyltransfer...	7	7	2.29	0.0004	0.0020129
Molecular function	GO:0004869	cysteine-type endopeptidase inhibitor ac...	7	7	2.29	0.0004	0.0020129
Molecular function	GO:0061608	nuclear import signal receptor activity	7	7	2.29	0.0004	0.0020129
Molecular function	GO:0048037	cofactor binding	236	102	77.26	0.00043	0.00214085
Molecular function	GO:0046915	transition metal ion transmembrane trans...	14	11	4.58	0.00058	0.00285726
Molecular function	GO:0016684	oxidoreductase activity, acting on perox...	22	15	7.2	0.0007	0.0034125
Molecular function	GO:1901505	carbohydrate derivative transmembrane tr...	9	8	2.95	0.00084	0.00405278
Molecular function	GO:0015078	hydrogen ion transmembrane transporter a...	40	23	13.09	0.00108	0.00515755
Molecular function	GO:0140096	catalytic activity, acting on a protein	1437	522	470.43	0.00119	0.00537333
Molecular function	GO:0004970	ionotropic glutamate receptor activity	27	17	8.84	0.00121	0.00537333
Molecular function	GO:0008066	glutamate receptor activity	27	17	8.84	0.00121	0.00537333
Molecular function	GO:0022824	transmitter-gated ion channel activity	27	17	8.84	0.00121	0.00537333
Molecular function	GO:0022835	transmitter-gated channel activity	27	17	8.84	0.00121	0.00537333
Molecular function	GO:0030594	neurotransmitter receptor activity	27	17	8.84	0.00121	0.00537333
Molecular function	GO:0002161	aminoacyl-tRNA editing activity	6	6	1.96	0.00123	0.00537333
Molecular function	GO:0003953	NAD+ nucleosidase activity	6	6	1.96	0.00123	0.00537333
Molecular function	GO:0071949	FAD binding	6	6	1.96	0.00123	0.00537333
Molecular function	GO:0016491	oxidoreductase activity	710	270	232.43	0.00124	0.00537333
Molecular function	GO:0016209	antioxidant activity	23	15	7.53	0.00141	0.00605394
Molecular function	GO:0043168	anion binding	1625	584	531.97	0.0018	0.00765818
Molecular function	GO:0005543	phospholipid binding	65	33	21.28	0.00192	0.00809514
Molecular function	GO:0005487	nucleocytoplasmic transporter activity	8	7	2.62	0.00229	0.00948425
Molecular function	GO:0016742	hydroxymethyl-, formyl- and related tran...	8	7	2.62	0.00229	0.00948425
