# Supplementary material for: Dissecting the chromosome-level genome of the Asian Clam (Corbicula fluminea)
Source: Sci Rep. 2021 Jul 22;11:15021. doi: 10.1038/s41598-021-94545-2 (PMC8298618; doi:10.1038/s41598-021-94545-2)
Supplement: Supplementary file 11 — Supplementary Table S16. [file 41598_2021_94545_MOESM11_ESM.xls]

## Sheet: Sheet1
Pathway	Gene number	Enrichment	Correct p_value
ko05322:Systemic lupus erythematosus	87	3.37555	1.32359e-12
ko04210:Apoptosis	117	2.0045	1.18853e-06
ko00430:Taurine and hypotaurine metabolism	59	2.47958	2.58113e-05
ko04142:Lysosome	119	1.80812	2.96089e-05
ko00983:Drug metabolism - other enzymes	61	1.90603	0.000973771
ko05168:Herpes simplex infection	89	1.85226	0.00024979
ko00512:Mucin type O-Glycan biosynthesis	39	2.40759	0.00181045
ko00511:Other glycan degradation	33	2.61091	0.00197626
ko00604:Glycosphingolipid biosynthesis - ganglio series	22	3.33081	0.00291706
ko00910:Nitrogen metabolism	26	2.86459	0.0034325
ko00590:Arachidonic acid metabolism	47	1.96798	0.00731467
ko04622:RIG-I-like receptor signaling pathway	45	1.99871	0.00731467
ko04610:Complement and coagulation cascades	34	2.24886	0.00761583
ko05412:Arrhythmogenic right ventricular cardiomyopathy (ARVC)	35	2.19539	0.00810519
ko00513:Various types of N-glycan biosynthesis	56	1.80627	0.00831822
ko00603:Glycosphingolipid biosynthesis - globo series	35	2.15801	0.00897562
ko04214:Apoptosis - fly	48	1.87964	0.0094822
ko05161:Hepatitis B	66	1.68317	0.00965865
ko00600:Sphingolipid metabolism	32	1.77235	0.00974488
